# Supplementary material for: Development of a selective and scalable N1-indazole alkylation
Source: Royal Society of Chemistry journal article supplement (doi:10.1039/d4ra00598h), 2024-01-01
Supplement: d4ra00598h1.pdf [file d4ra00598h1.pdf]

# Data-Driven Development of a Selective and Scalable *N*1-Indazole Alkylation

## Supporting Information

Jimmy Wang<sup>\*1</sup>, Aaron Mccreanney<sup>‡1</sup>, Amelia Taylor-Young<sup>‡1</sup>, Harriet A. M. Fenton<sup>1</sup>, Rayyan Miah<sup>1</sup>, Rebecca A. Johnson<sup>1</sup>, James Clarke<sup>1</sup>, Adam Hopkins<sup>1</sup>, Ricky Jones<sup>1</sup>, William S. Waddington<sup>1</sup>, Steven J. Fussell<sup>1</sup>, Matthew Badland<sup>1</sup>, Benjamin Pibworth<sup>2</sup>, Robert Walton<sup>\*1</sup>

<sup>1</sup>Pfizer R&D UK Limited, Ramsgate Road, Sandwich, Kent, CT13 9NJ, United Kingdom.

<sup>2</sup>Concept Life Sciences, Ramsgate Road, Sandwich, Kent, CT13 9NJ, United Kingdom

\*To whom correspondence should be addressed:

[Jimmy.Wang2@pfizer.com](mailto:Jimmy.Wang2@pfizer.com)

[Robert.Walton@pfizer.com](mailto:Robert.Walton@pfizer.com)

<sup>‡</sup>AM and ATY contributed equally to this work.

## Contents

|                                                          |     |
|----------------------------------------------------------|-----|
| Contents.....                                            | 2   |
| General Considerations.....                              | 3   |
| Initial Synthesis and NMR Assignment (unoptimized) ..... | 4   |
| Lab Chemist Investigation .....                          | 14  |
| High-Throughput Experimentation Investigation .....      | 15  |
| Reaction Optimization .....                              | 38  |
| Reaction Scope.....                                      | 43  |
| Mechanistic Investigations .....                         | 56  |
| Process Optimization and Scale-Up .....                  | 80  |
| NMR Spectra of Products.....                             | 123 |
| References .....                                         | 257 |

## General Considerations

Reagents and solvents were purchased from commercial suppliers or external vendors and used without further purification.

Reactions were conducted on Mettler Toledo EasyMax 102 reactors. Hydrogenation reactions were conducted in Type 3 Buchiglasuster reactors.

Melting points were measured with a Stuart SMP50 Automatic Digital Melting Point Apparatus.

Infrared spectra were recorded on a Thermo Scientific Nicolet iS50 FTIR Spectrometer equipped with a diamond ATR module.

NMR spectra for characterisation were obtained on a Bruker AVANCE Neo 400 MHz spectrometer. Chemical shifts are reported in ppm and coupling constants are reported in Hz and rounded to the nearest 0.5 Hz.  $^1\text{H}$  and  $^{13}\text{C}$  chemical shifts are referenced to the appropriate residual solvent signal.<sup>1</sup>

High resolution mass spectra were recorded on an Agilent 6550 iFunnel Q-TOF LC/MS or ThermoFisher Orbitrap Exploris 120 Mass Spectrometers. High resolution values are calculated to four decimal places from the molecular formula and within a tolerance of  $\pm 5$  ppm.

## Initial Synthesis and NMR Assignment (unoptimized)

### Synthesis and Characterisation

#### Methyl 5-bromo-1-isobutyl-1*H*-indazole-6-carboxylate and methyl 5-bromo-2-isobutyl-2*H*-indazole-6-carboxylate (2a and 3a)

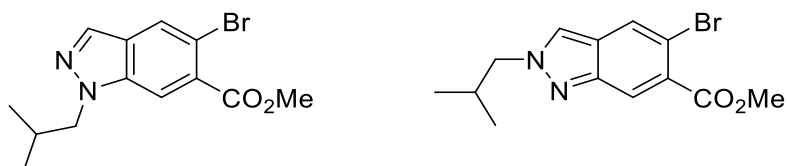

1-Bromo-2-methylpropane (0.85 mL, 7.84 mmol, 1.0 equiv) was added to potassium carbonate (1.20 g, 8.63 mmol, 1.1 equiv) and methyl 5-bromo-1*H*-indazole-6-carboxylate (2.00 g, 7.84 mmol, 1.0 equiv) in *N,N*-dimethylformamide (20 mL). The reaction mixture was heated to 120 °C for 1 hour, then cooled to 20 °C. The reaction mixture was diluted with MTBE (100 mL), then washed with H<sub>2</sub>O (100 mL), sat. brine (100 mL) and 5% LiCl<sub>(aq)</sub> (100 mL). The organic layer was dried over MgSO<sub>4</sub>, filtered, and concentrated to afford crude product. The crude product was purified by flash silica chromatography (elution gradient 0 to 40% EtOAc in heptane) to afford methyl 5-bromo-1-isobutyl-1*H*-indazole-6-carboxylate (1.15 g, 3.70 mmol, 47%) as an orange oil, followed by methyl 5-bromo-2-isobutyl-2*H*-indazole-6-carboxylate (0.62 g, 1.98 mmol, 25%) as a yellow oil.

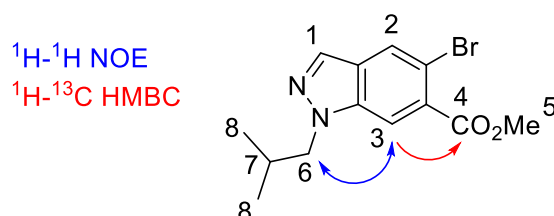

$\nu_{\text{max}}$  (neat) /cm<sup>-1</sup> 2957, 1729, 1470, 1244; <sup>1</sup>H NMR (400 MHz, CDCl<sub>3</sub>)  $\delta$  8.02 (s, 1H, **H2**), 7.97 (s, 1H, **H1**), 7.85 (s, 1H, **H3**), 4.19 (d, *J* = 7.5 Hz, 2H, **H6**), 3.99 (s, 3H, **H5**), 2.42 – 2.25 (m, 1H, **H7**), 0.93 (d, *J* = 6.5 Hz, 6H, **H8**); <sup>13</sup>C NMR (101 MHz, CDCl<sub>3</sub>)  $\delta$  167.3 (**C4**), 138.1, 131.6, 129.9, 126.5, 126.4, 112.6, 111.5, 56.8, 52.4, 30.2, 20.8; HRMS (ESI<sup>+</sup>) calc. for C<sub>13</sub>H<sub>16</sub><sup>79</sup>BrN<sub>2</sub>O<sub>2</sub> ([M+H]<sup>+</sup>) 311.0390; found 311.0392.

S5

## NMR Spectra for Assignment

### Methyl 5-bromo-2-isobutyl-1*H*-indazole-6-carboxylate

$^1\text{H}$  NMR (400 MHz,  $\text{CDCl}_3$ )

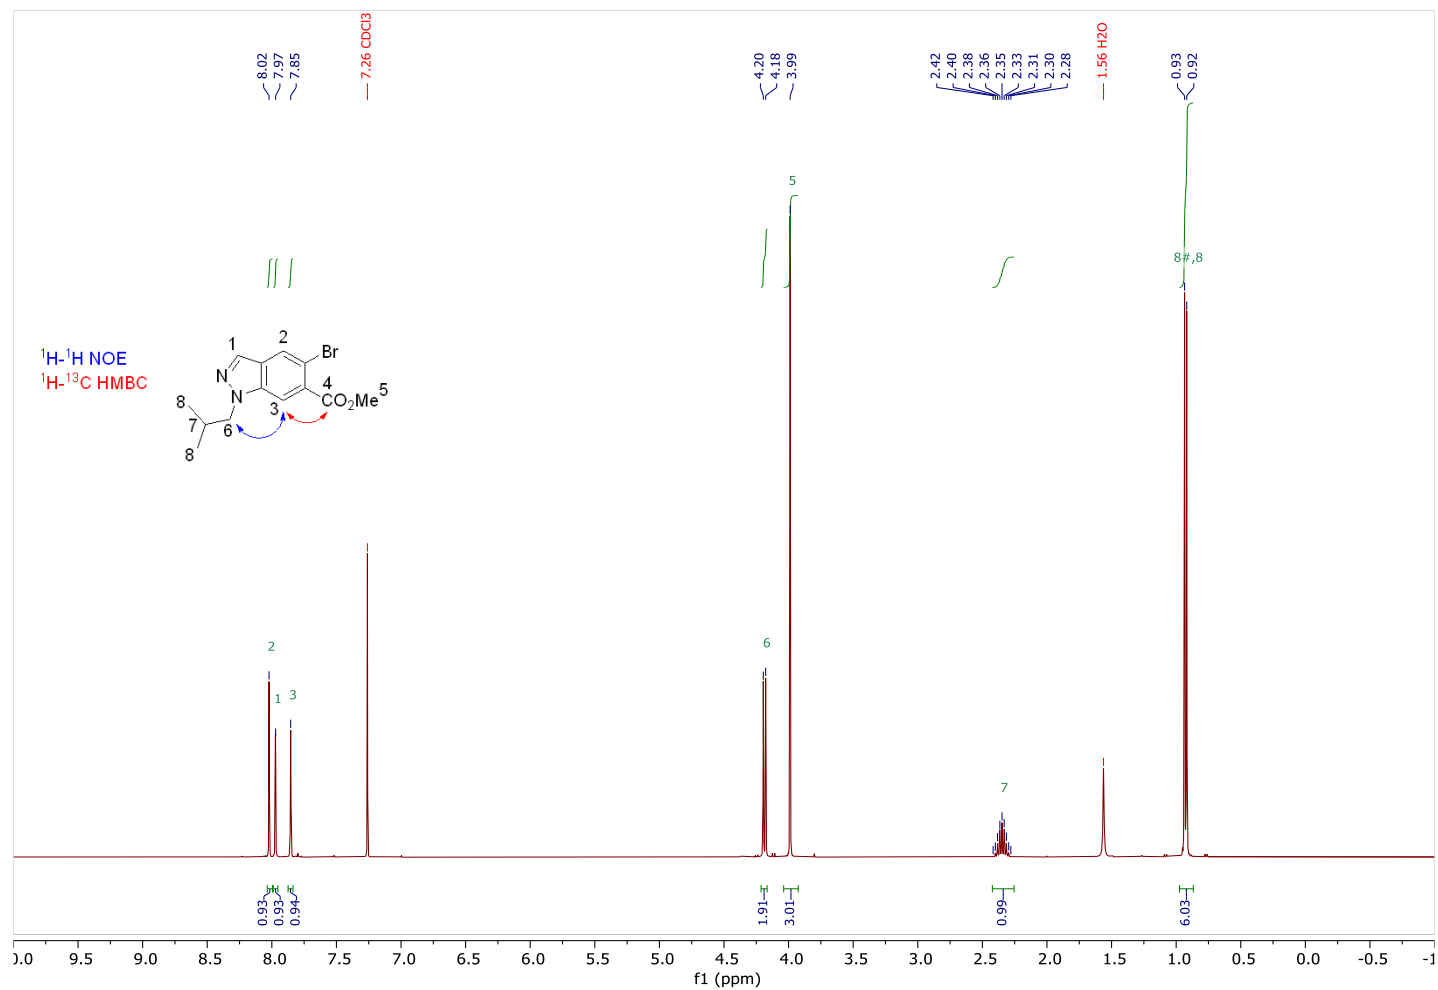

**$^{13}\text{C}$  NMR (101 MHz,  $\text{CDCl}_3$ )**

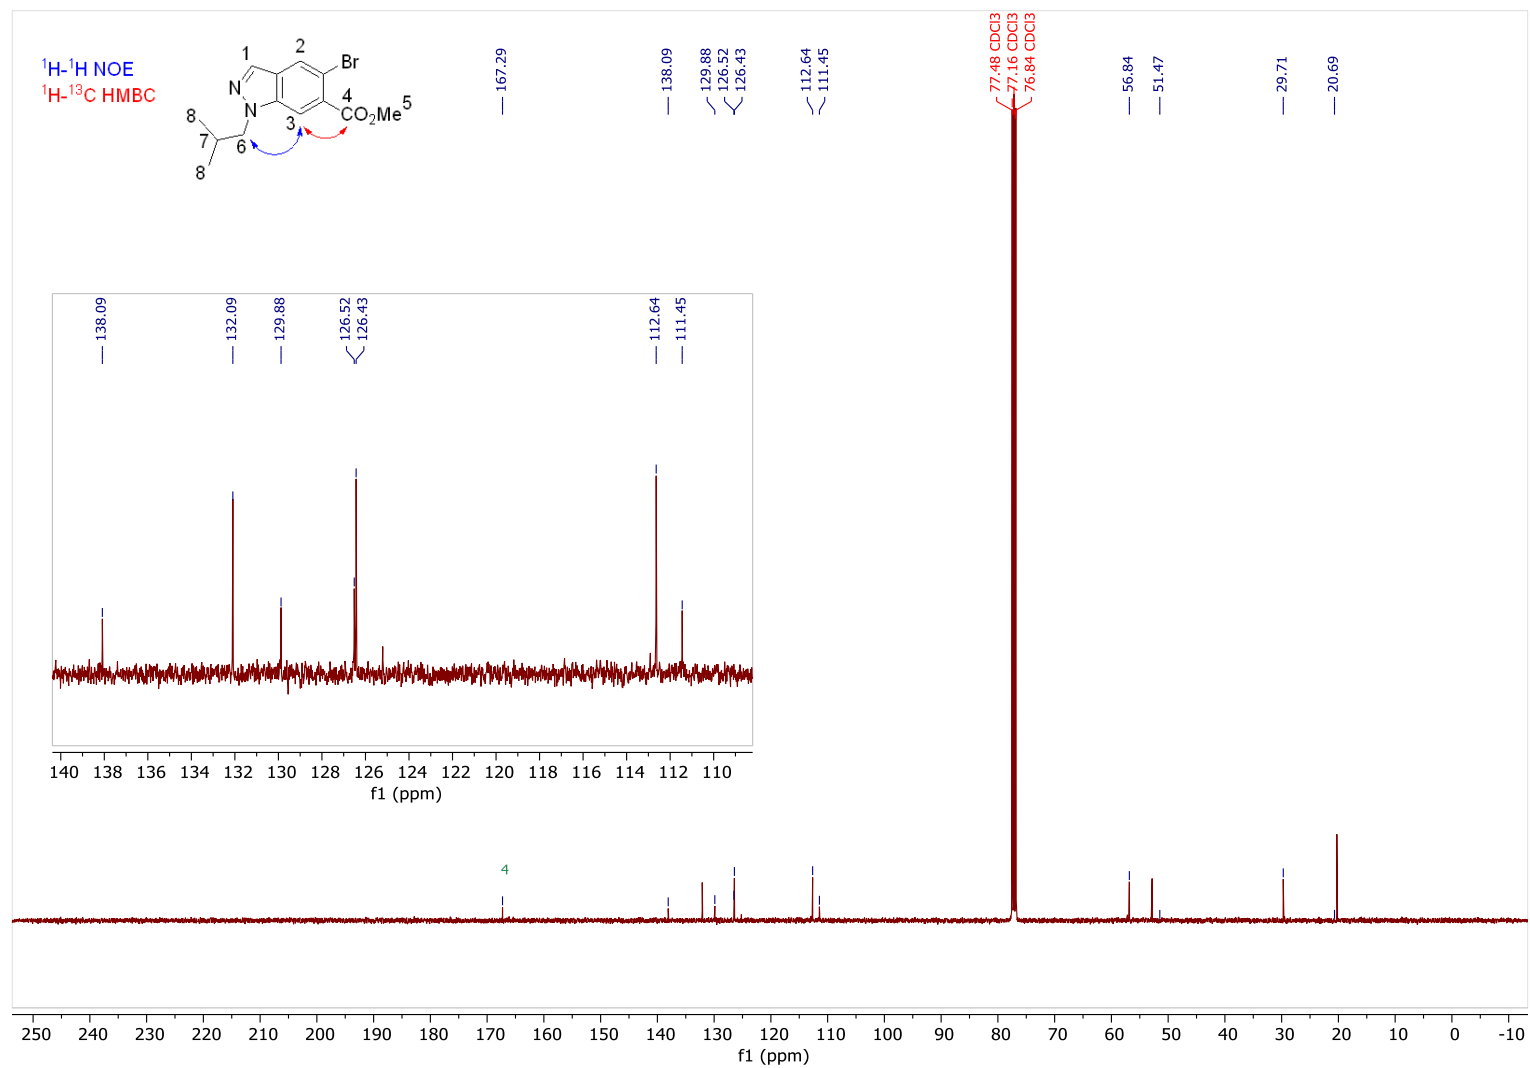

$^1\text{H}$ - $^{13}\text{C}$  HMBC ( $\text{CDCl}_3$ )

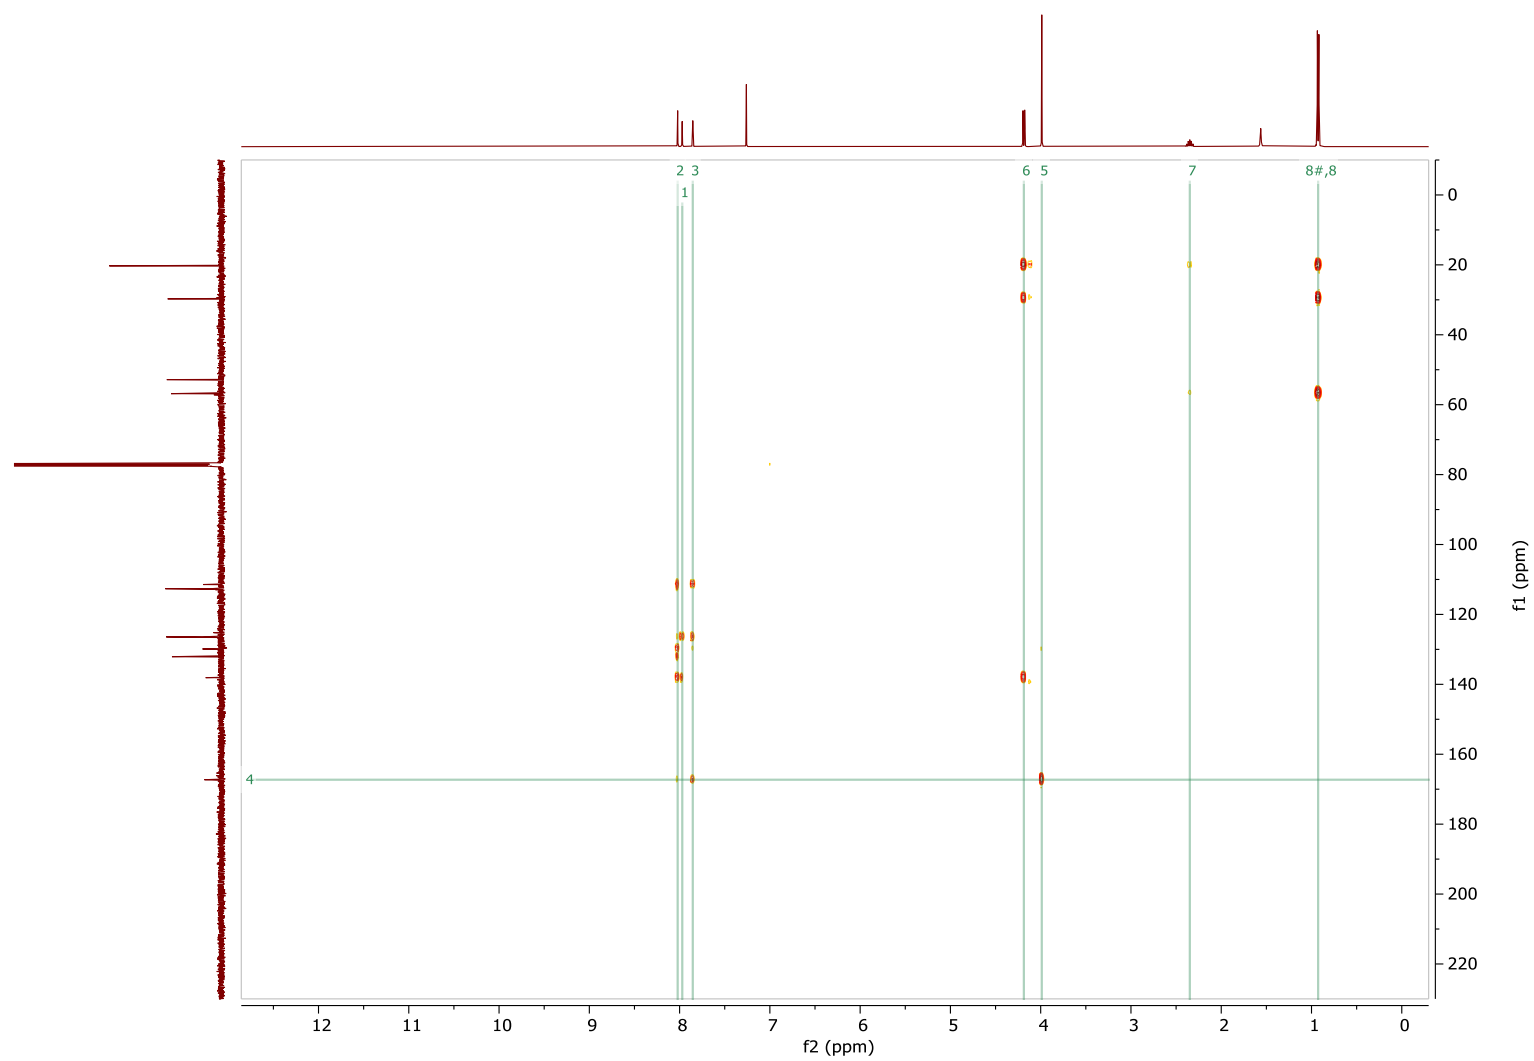

$^1\text{H}$ - $^1\text{H}$  NOESY (400 MHz,  $\text{CDCl}_3$ )

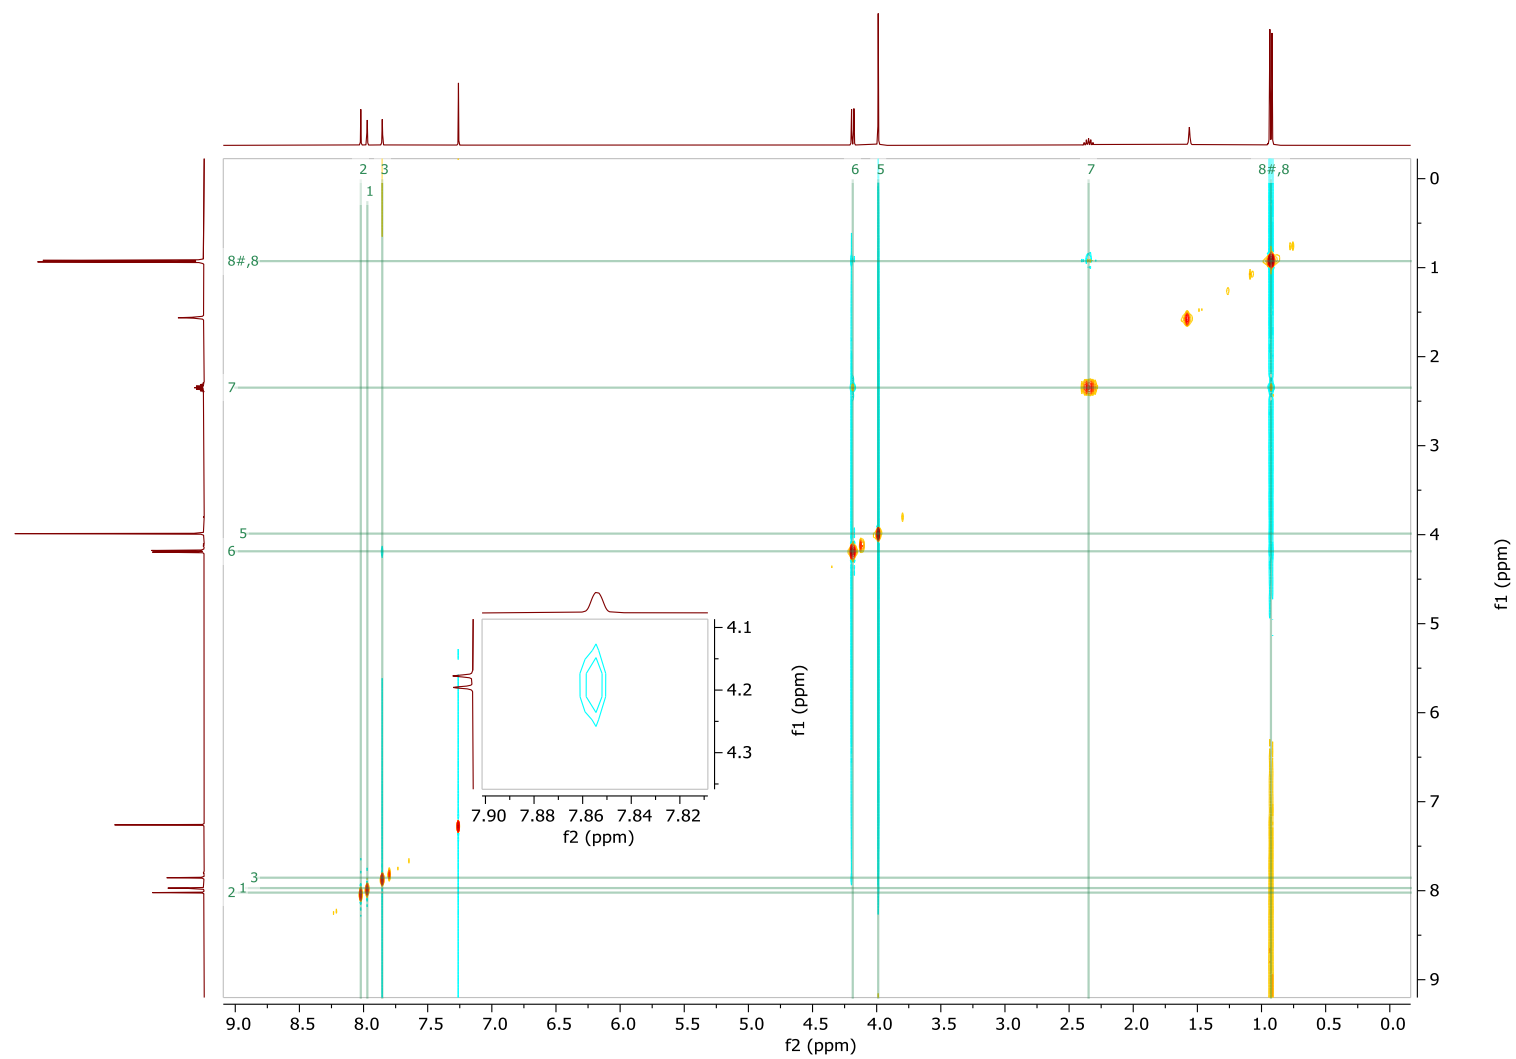

**Methyl 5-bromo-1-isobutyl-2H-indazole-6-carboxylate**

**$^1\text{H}$  NMR (400 MHz,  $\text{CDCl}_3$ )**

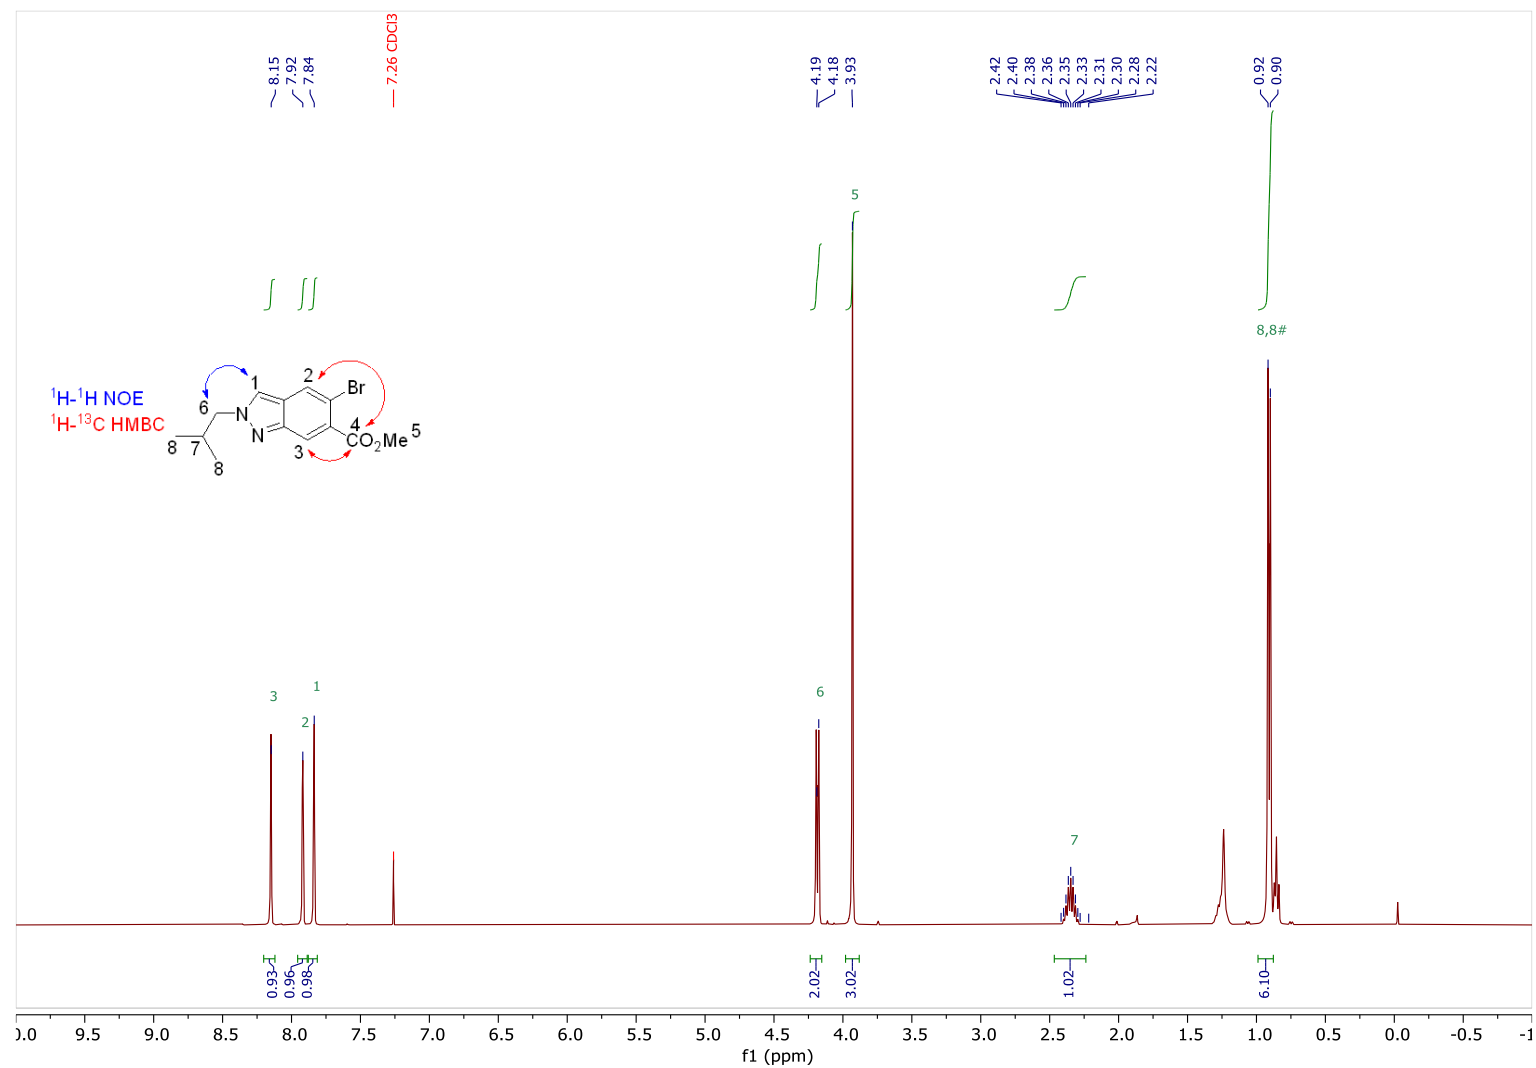

**$^{13}\text{C}$  NMR (101 MHz,  $\text{CDCl}_3$ )**

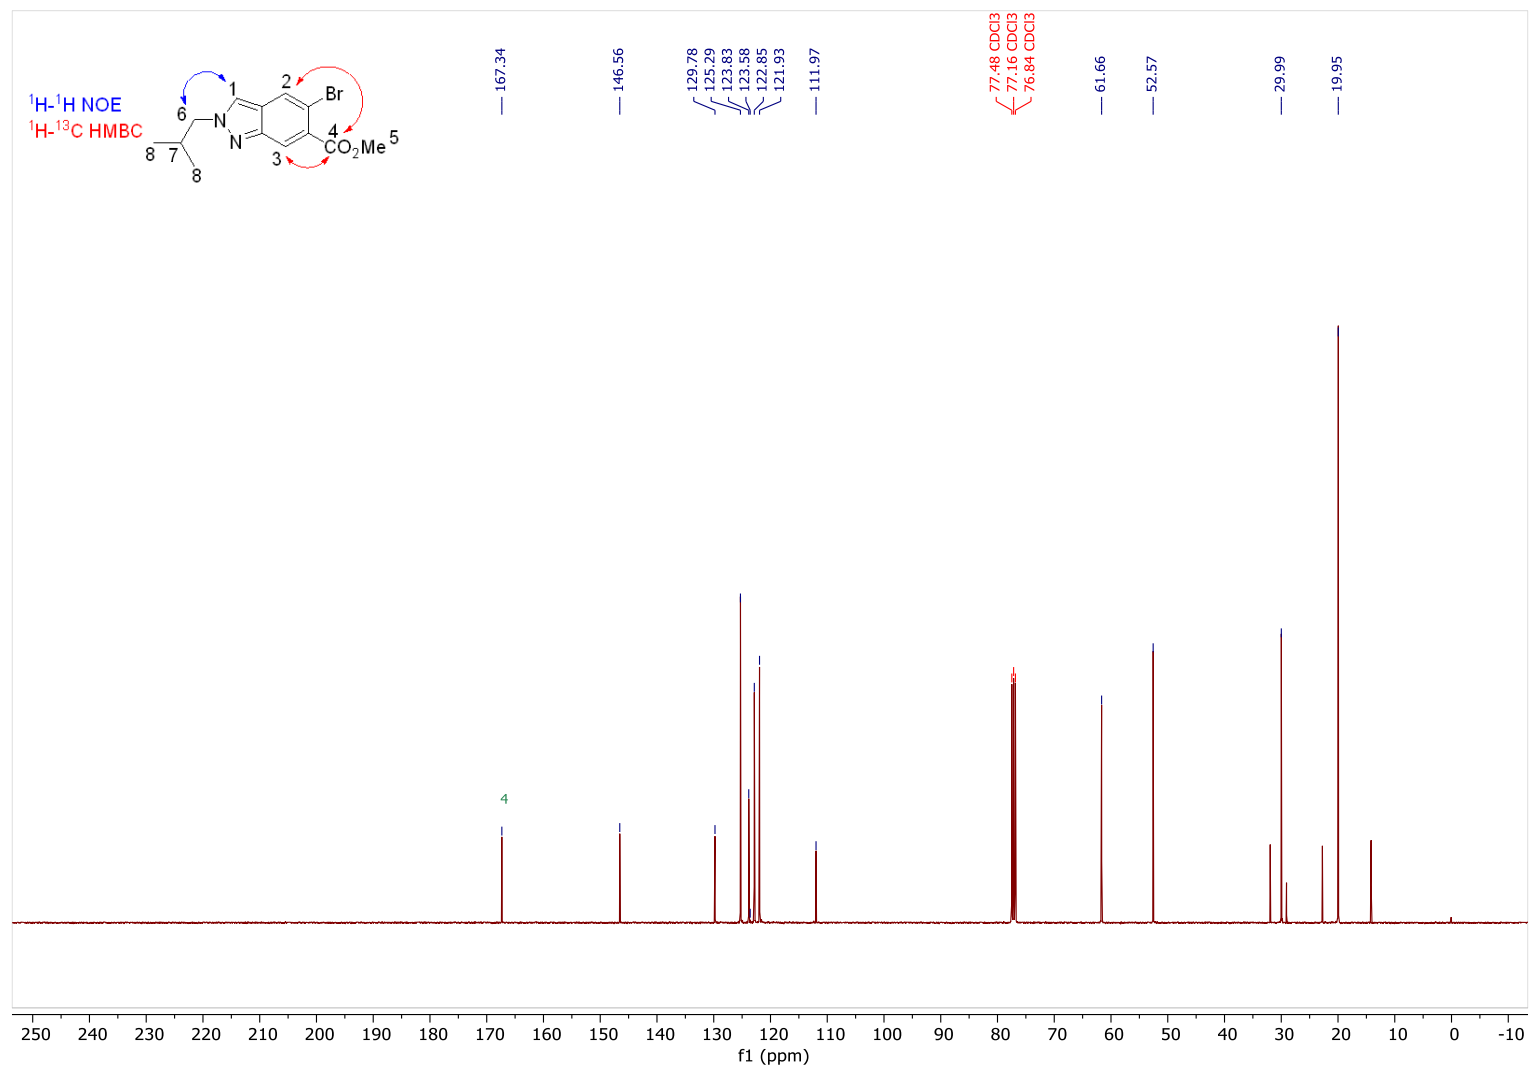

$^1\text{H}$ - $^{13}\text{C}$  HMBC ( $\text{CDCl}_3$ )

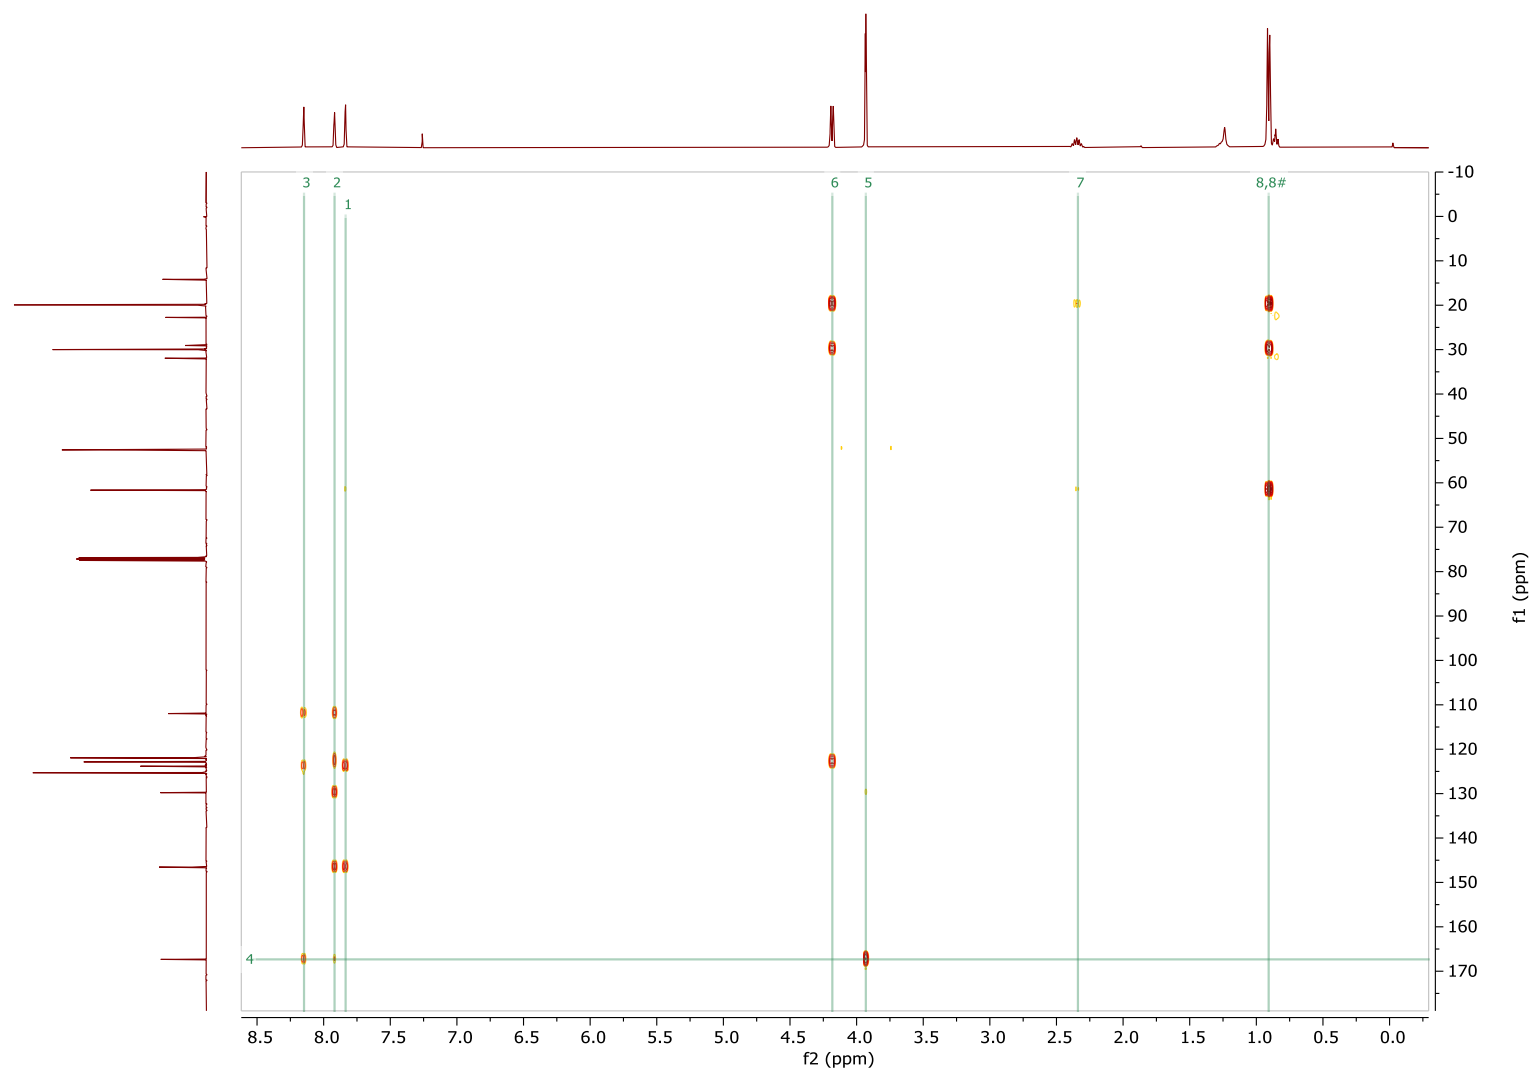

$^1\text{H}$ - $^1\text{H}$  NOESY (400 MHz,  $\text{CDCl}_3$ )

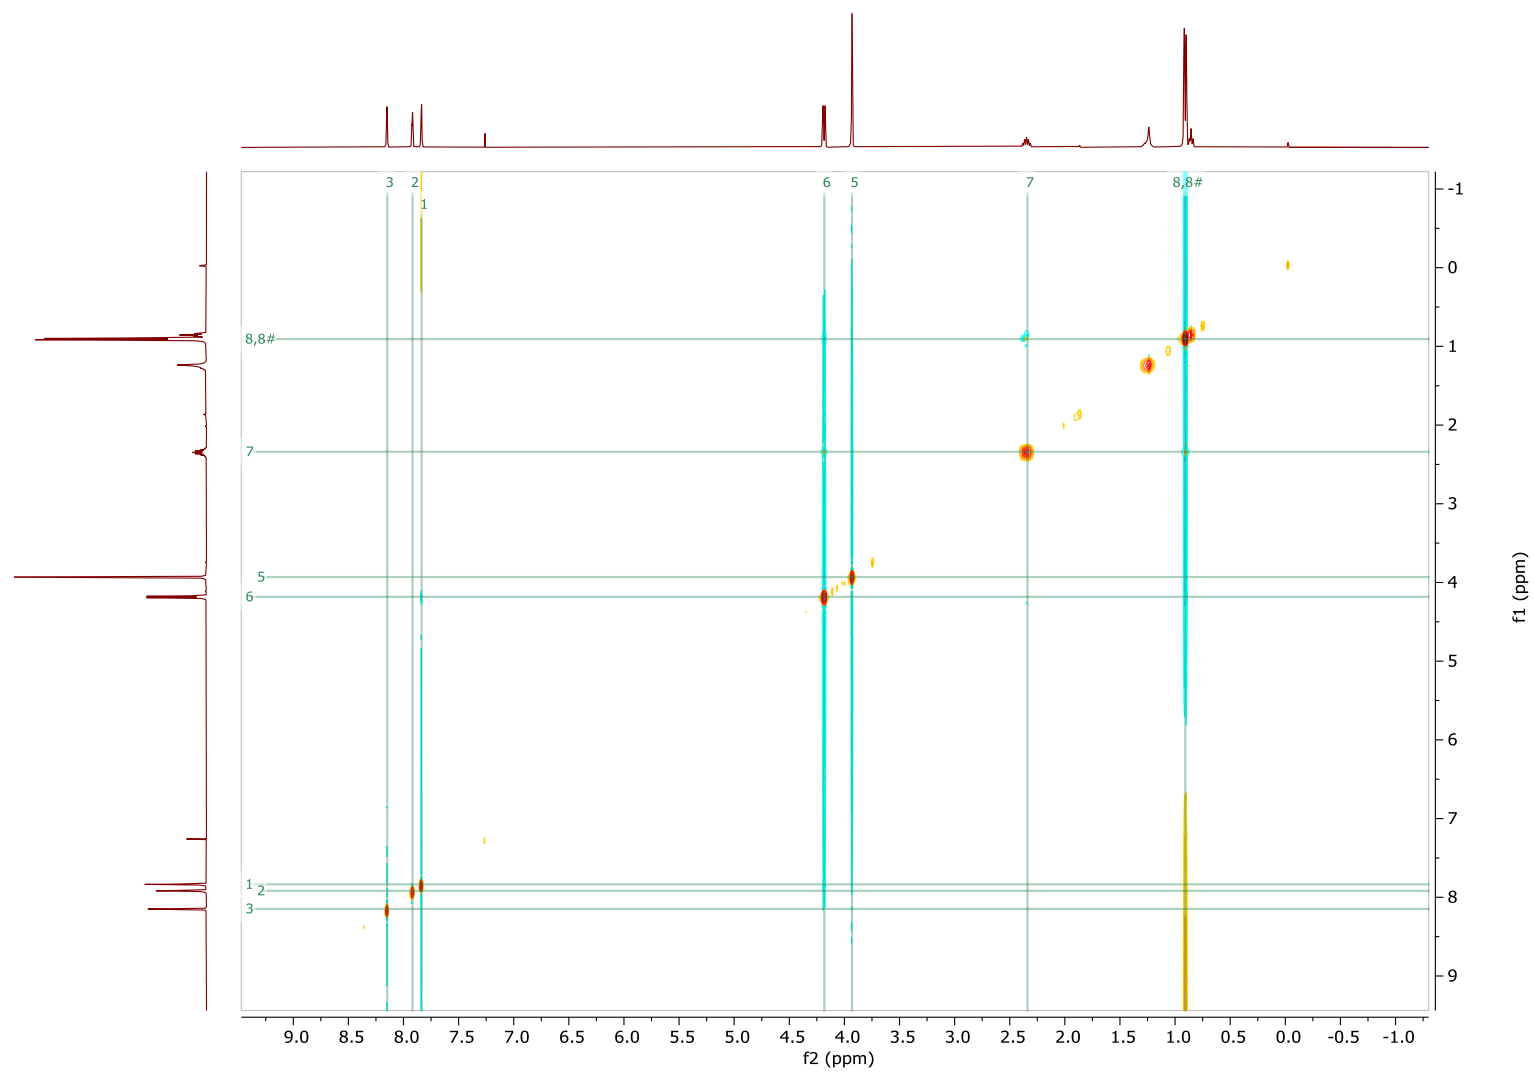

## Lab Chemist Investigation

Alkylation reagent was added to base, methyl 5-bromo-1*H*-indazole-6-carboxylate **1a**, and solvent in a sealed vial. The vial was stirred at the indicated temperature and time. A sample for LCMS analysis was prepared from 20  $\mu$ L of reaction mixture in MeCN:H<sub>2</sub>O (4:1, 1 mL). Conversion and *N*1:*N*2 ratio determined by LCMS at 225 nm.

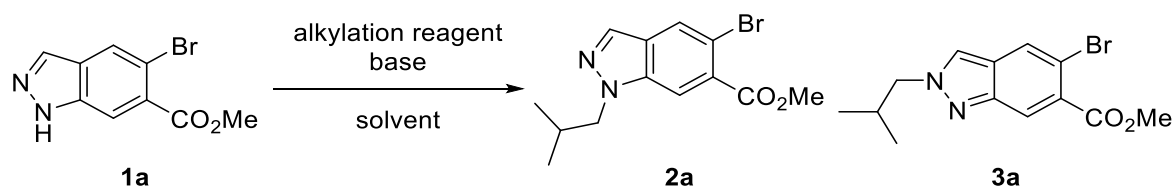

| entry | alkylation reagent        | base                                             | solvent                         | temp         | time | conversion<br>(ratio <b>2a:3a</b> ) |
|-------|---------------------------|--------------------------------------------------|---------------------------------|--------------|------|-------------------------------------|
| 1     | <i>i</i> BuBr (1.0 equiv) | K <sub>2</sub> CO <sub>3</sub> (1.1 equiv)       | DMF                             | 120 °C       | 1 h  | 90%<br>(58:42)                      |
| 2     | <i>i</i> BuBr (1.1 equiv) | K <sub>2</sub> CO <sub>3</sub> (1.1 equiv)       | DMF                             | 120 °C       | 1 h  | >99%<br>(58:42)                     |
| 3     | <i>i</i> BuBr (1.2 equiv) | NaH (60%) (1.2 equiv)                            | DMF                             | 0 °C         | 2 h  | 31%<br>(53:47)                      |
| 4     | <i>i</i> BuBr (1.5 equiv) | K <sub>2</sub> CO <sub>3</sub> (1.5 equiv)       | THF                             | 70 °C        | 21 h | 15%<br>(41:59)                      |
| 5     | <i>i</i> BuBr (1.2 equiv) | NaH (60%) (1.2 equiv)                            | THF                             | 0 °C         | 21 h | 2%<br>(56:44)                       |
| 6     | <i>i</i> BuBr (1.1 equiv) | Et <sub>3</sub> N (1.4 equiv)                    | CH <sub>2</sub> Cl <sub>2</sub> | 40 °C        | 3 h  | 1%<br>(69:31)                       |
| 7     | <i>i</i> BuI (1.1 equiv)  | Et <sub>3</sub> N (1.4 equiv)                    | CH <sub>2</sub> Cl <sub>2</sub> | 40 °C        | 3 h  | 7%<br>(4:96)                        |
| 8     | <i>i</i> BuOH (5.0 equiv) | PPh <sub>3</sub> (2.0 equiv)<br>DIAD (2.0 equiv) | THF                             | 60 °C<br>2 h | 2 h  | >99%<br>(53:47)                     |

## High-Throughput Experimentation Investigation

### Screen Design

#### Base selection

| entry | base                               | selected descriptors                          |           |           |
|-------|------------------------------------|-----------------------------------------------|-----------|-----------|
|       |                                    | pKa of conjugate acid                         | form (rt) | type      |
| 1     | Na <sub>2</sub> CO <sub>3</sub>    | 20.8±0.1 (DMSO) <sup>2</sup>                  | Solid     | Carbonate |
| 2     | K <sub>2</sub> CO <sub>3</sub>     | 20.8±0.1 (DMSO) <sup>2</sup>                  | Solid     | Carbonate |
| 3     | Cs <sub>2</sub> CO <sub>3</sub>    | 20.8±0.1 (DMSO) <sup>2</sup>                  | Solid     | Carbonate |
| 4     | K <sub>3</sub> PO <sub>4</sub>     | 12.35 (H <sub>2</sub> O) <sup>3</sup>         | Solid     | Phosphate |
| 5     | KO <sup>t</sup> Bu                 | 16.54 (H <sub>2</sub> O) <sup>4</sup>         | Solid     | Alkoxide  |
| 6     | KOSiMe <sub>3</sub>                | 11 <sup>5</sup>                               | Solid     | Alkoxide  |
| 7     | DMAP                               | 11.2 (THF) <sup>6</sup>                       | Solid     | Amine     |
| 8     | TBD                                | 21.0 (THF) <sup>6</sup>                       | Solid     | Amine     |
| 9     | pyridine                           | 5.5 (THF) <sup>6</sup>                        | Liquid    | Amine     |
| 10    | 2,6-di- <sup>t</sup> butylpyridine | 3.58 (EtOH/H <sub>2</sub> O 1:1) <sup>7</sup> | Liquid    | Amine     |
| 11    | Et <sub>3</sub> N                  | 12.5 (THF) <sup>6</sup>                       | Liquid    | Amine     |
| 12    | NaH (60%)                          | 35.3±0.3 (THF/18-crown-6) <sup>8</sup>        | Solid     | Hydride   |

#### Reagent selection

| entry | reagent           | selected descriptors |                                 |
|-------|-------------------|----------------------|---------------------------------|
|       |                   | leaving group        | b.p. (°C)                       |
| 1     | isobutyl bromide  | bromide              | 90-92 <sup>a</sup>              |
| 2     | isobutyl iodide   | iodide               | 120-121 <sup>a</sup>            |
| 3     | isobutyl mesylate | mesylate             | 82 (6.0 mmHg) <sup>b</sup>      |
| 4     | isobutyl tosylate | tosylate             | 163-165 (6.0 mmHg) <sup>c</sup> |

<sup>a</sup>Sigma-Aldrich. <sup>b</sup>Fisher Scientific. <sup>c</sup>ref 9.

#### Solvent selection

| entry | reagent | class    | selected descriptors                     |            |            |                                 | b.p. (°C) <sup>c</sup> |
|-------|---------|----------|------------------------------------------|------------|------------|---------------------------------|------------------------|
|       |         |          | Hansen solubility parameter <sup>a</sup> |            |            | Polarity <i>P'</i> <sup>b</sup> |                        |
|       |         |          | $\delta_d$                               | $\delta_p$ | $\delta_h$ |                                 |                        |
| 1     | MeCN    | nitrile  | 15.3                                     | 18.0       | 16.1       | 5.8                             | 82                     |
| 2     | THF     | ether    | 16.8                                     | 5.7        | 8.0        | 4.0                             | 66                     |
| 3     | NMP     | amide    | 18.0                                     | 12.3       | 7.2        | 6.7                             | 202                    |
| 4     | PhMe    | aromatic | 18.0                                     | 1.4        | 2.0        | 2.4                             | 110                    |

<sup>a</sup>ref 10. <sup>b</sup>ref 11. <sup>c</sup>Sigma-Aldrich.

## Procedure

Within a nitrogen glovebox (<100ppm O<sub>2</sub>), 2×96-well Paradox plates were prepared with 0.8 mL glass shell vials equipped with a tumble stir disc using a stir disc plate dispenser. Methyl 5-bromo-1*H*-indazole-6-carboxylate (15 mg, 58.8 μmol, 1.0 equiv) and solid bases (64.7 μmol, 1.1 equiv) were dispensed using the Mettler Toledo QX96. Solvents (300 μL) were dispensed using an autorepeat pipette follow by alkylation reagent (58.8 μmol, 1.0 equiv), and liquid bases (64.7 μmol, 1.1 equiv). Plates were sealed, and reaction mixtures stirred at T<sub>j</sub> 50 °C for 16 h at 500 rpm. Reaction plates were sampled using the 6-tip syringe arm on the Unchained Labs CM3 robot, set to dilute 15 μL of reaction mixture with MeCN:Water (1:1, 700 μL) into a 96 well sample plate. An image of the plate contents was taken at the end of the reaction to illustrate physical form of each reaction vial and its contents.

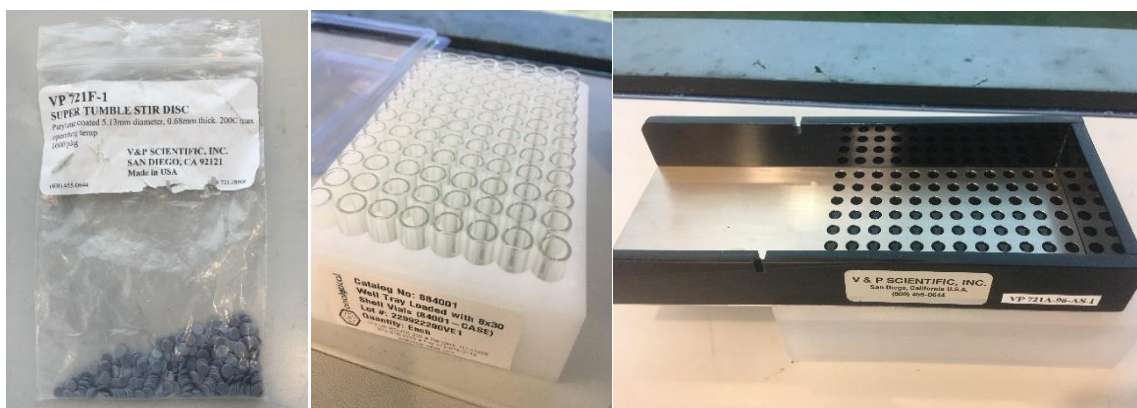

**Left:** Super tumble stir discs. **Middle:** 0.8 mL glass shell vials. **Right:** Stir disc plate dispenser.

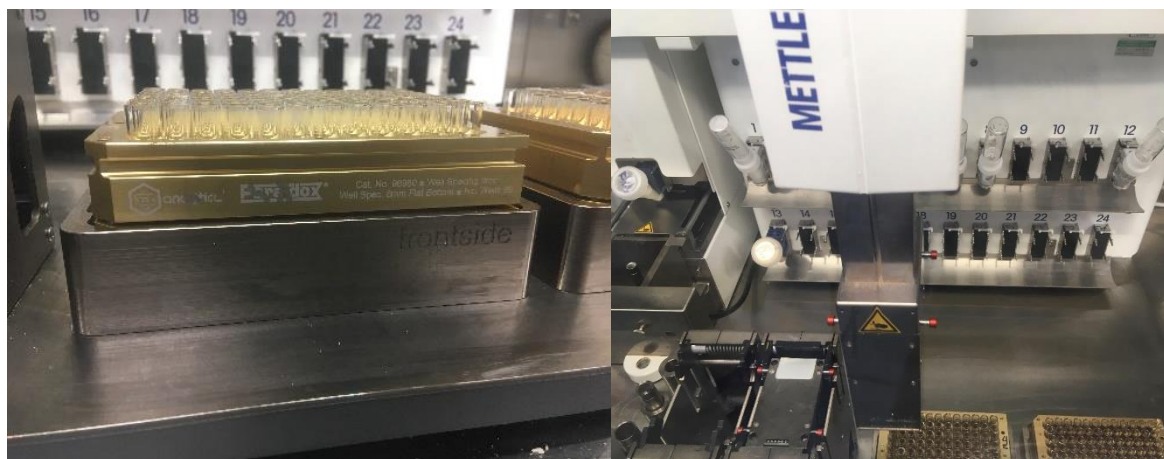

**Left:** Glass vials in 96-well Paradox plates. **Right:** Mettler Toledo QX96 powder dispensing robot.

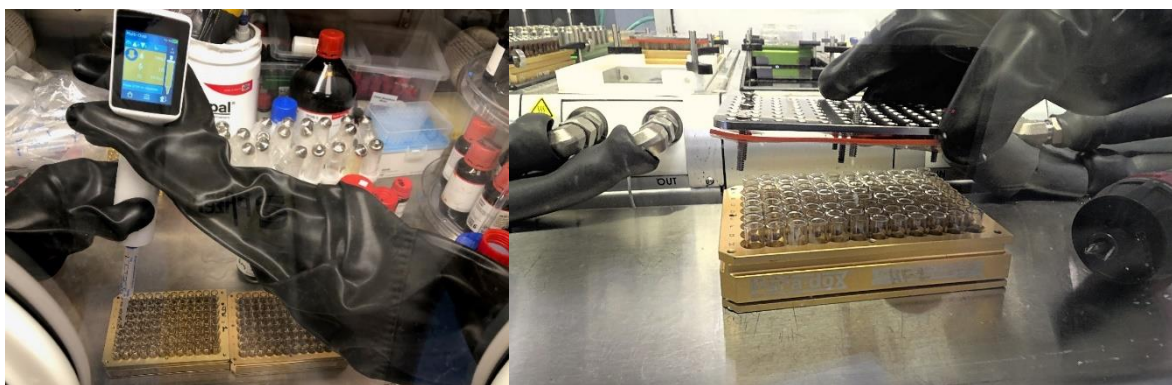

**Left:** Liquid reagents and solvents dispensed with autopipette and Eppendorf Combitips. **Right:** Plates sealed with PFA sheet, red rubber mat and metal gasket.

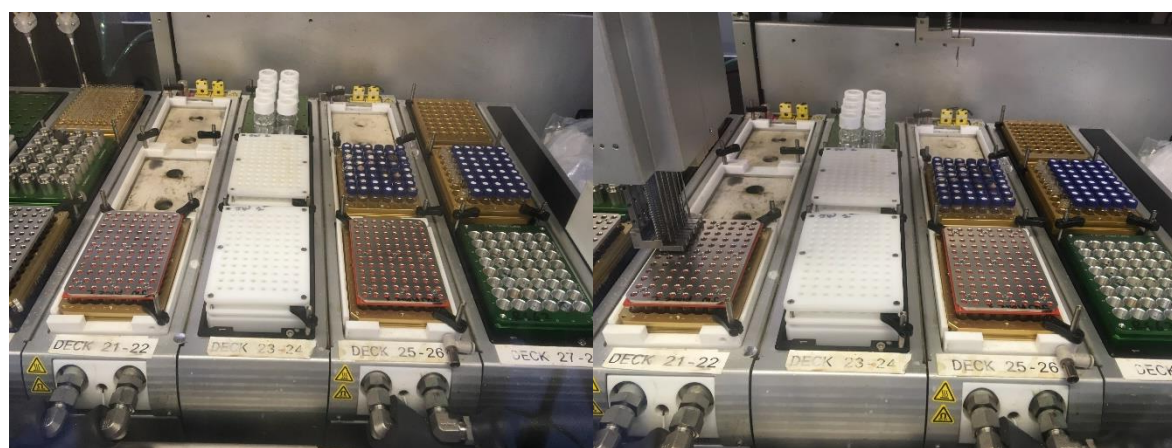

**Left:** Plates (Deck 21-22 and 25-26) stirring on the Unchained Labs CM3 deck. **Right:** 6-tip syringe arm sampling reactions.

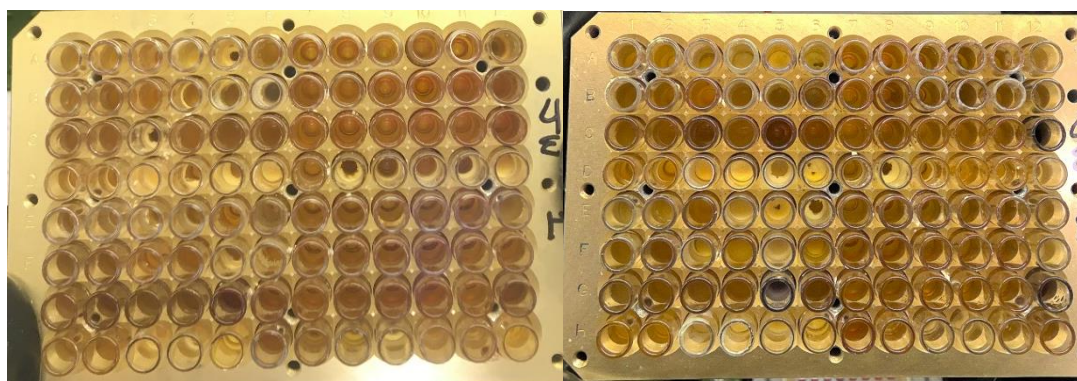

Reaction sample visuals.

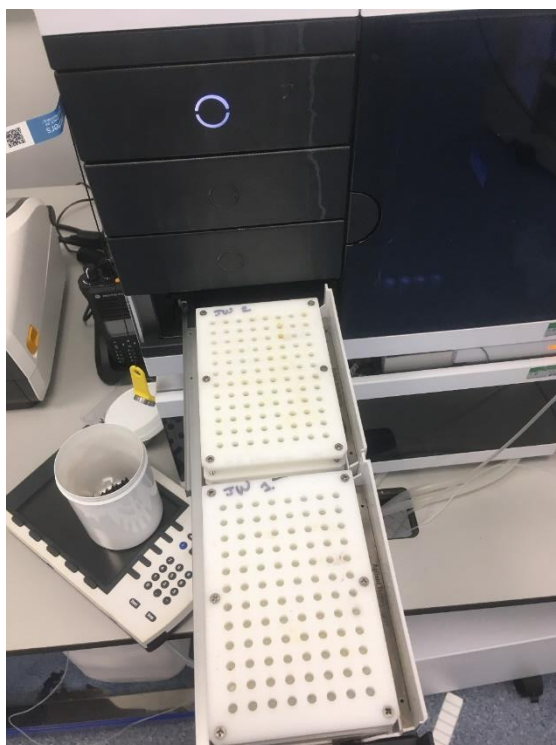

Samples prepared for analysis.

## HTE Analysis

### LCMS instrument parameters

| entry | parameter          | details                                                 |
|-------|--------------------|---------------------------------------------------------|
| 1     | system             | Agilent 1290                                            |
| 2     | column             | CORTECS C18 Column<br>90 Å, 1.6 µm, 2.1 × 50 mm, Waters |
| 3     | mobile phase A     | 0.1% wt. HCOOH in H <sub>2</sub> O                      |
| 4     | mobile phase B     | MeCN                                                    |
| 5     | flow rate          | 1.0 mL/min                                              |
| 6     | column temp.       | 65 °C                                                   |
| 7     | max pressure limit | 1300 bar                                                |
| 8     | injection volume   | 1 µL                                                    |
| 9     | detection          | 190-400 nm, 2 nm step<br>40 Hz data collection rate     |

### LCMS method gradient

| time (min) | mobile phase A% | mobile phase B% |
|------------|-----------------|-----------------|
| 0.00       | 95              | 5               |
| 1.00       | 0               | 100             |
| 1.30       | 0               | 100             |
| 1.31       | 95              | 5               |

### Key retention times

**1a:** rt = 0.57 min

**2a:** rt = 0.82 min

**2b:** rt = 0.76 min

## Reference LC traces

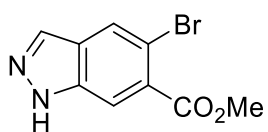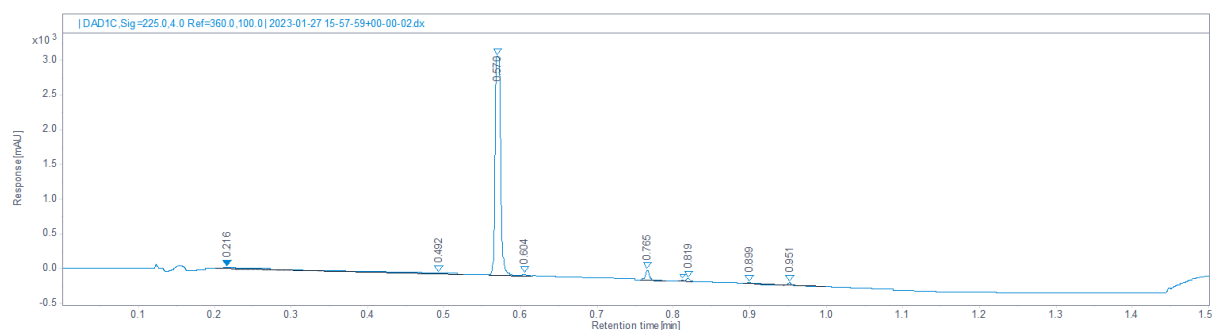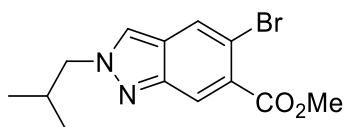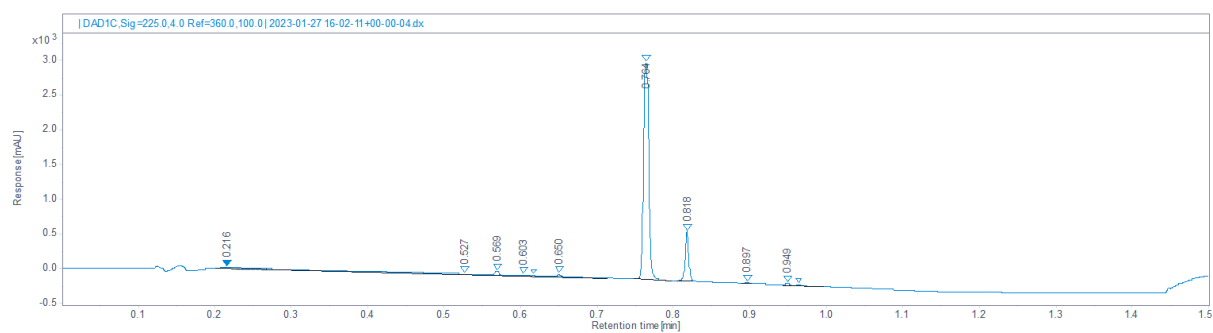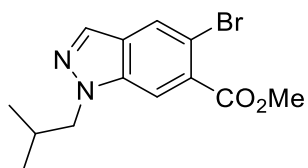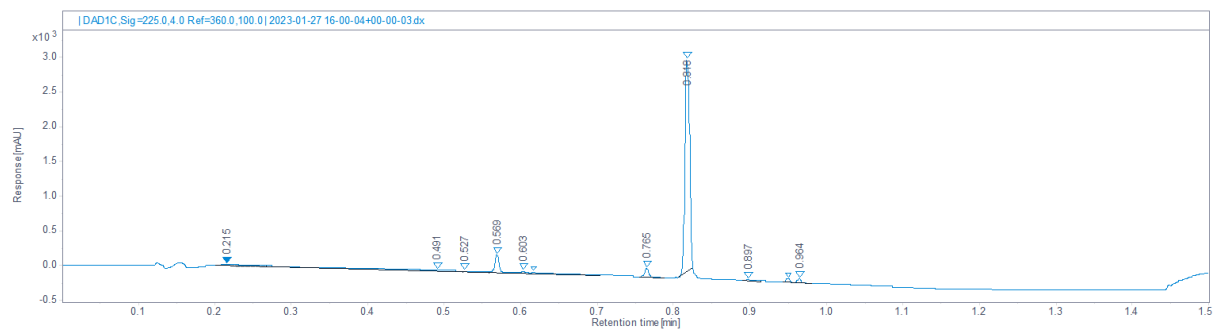

## Selected LC traces

### Representative example

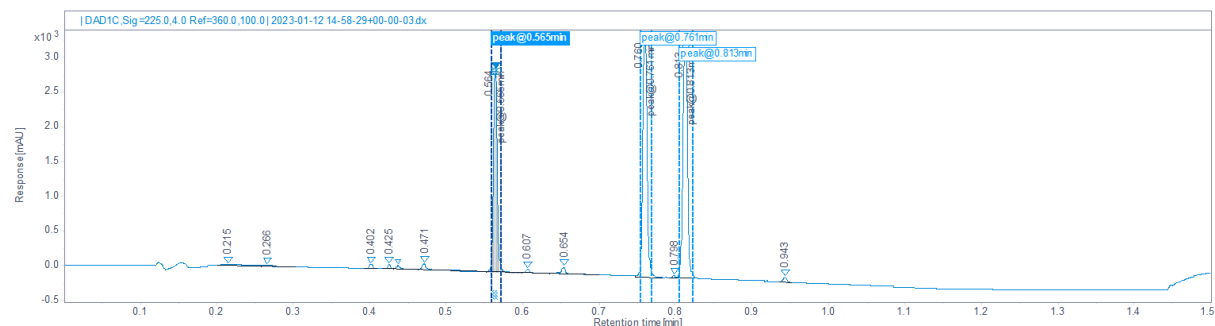

### Hydrolysis example

Peaks at 0.703 min and 0.768 min had mass ion corresponding to hydrolysed product.

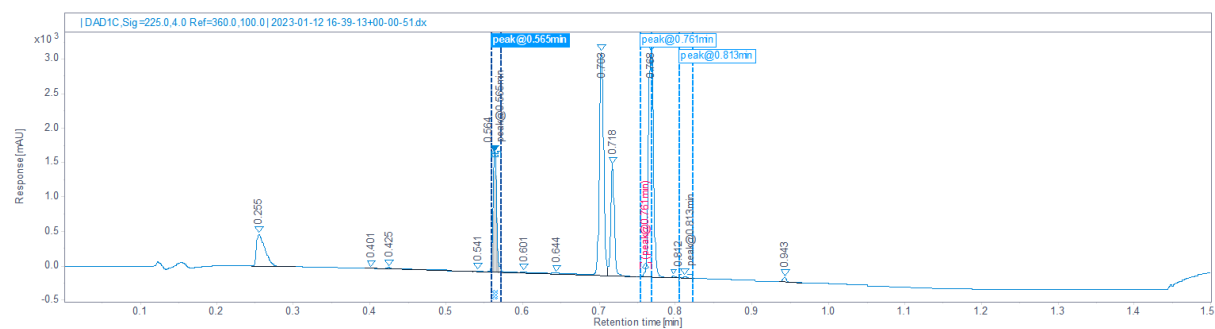

HTE Results

Visualisation Analysis

Heat map of results.

n1/n2 per solvent, SM 2 and Base

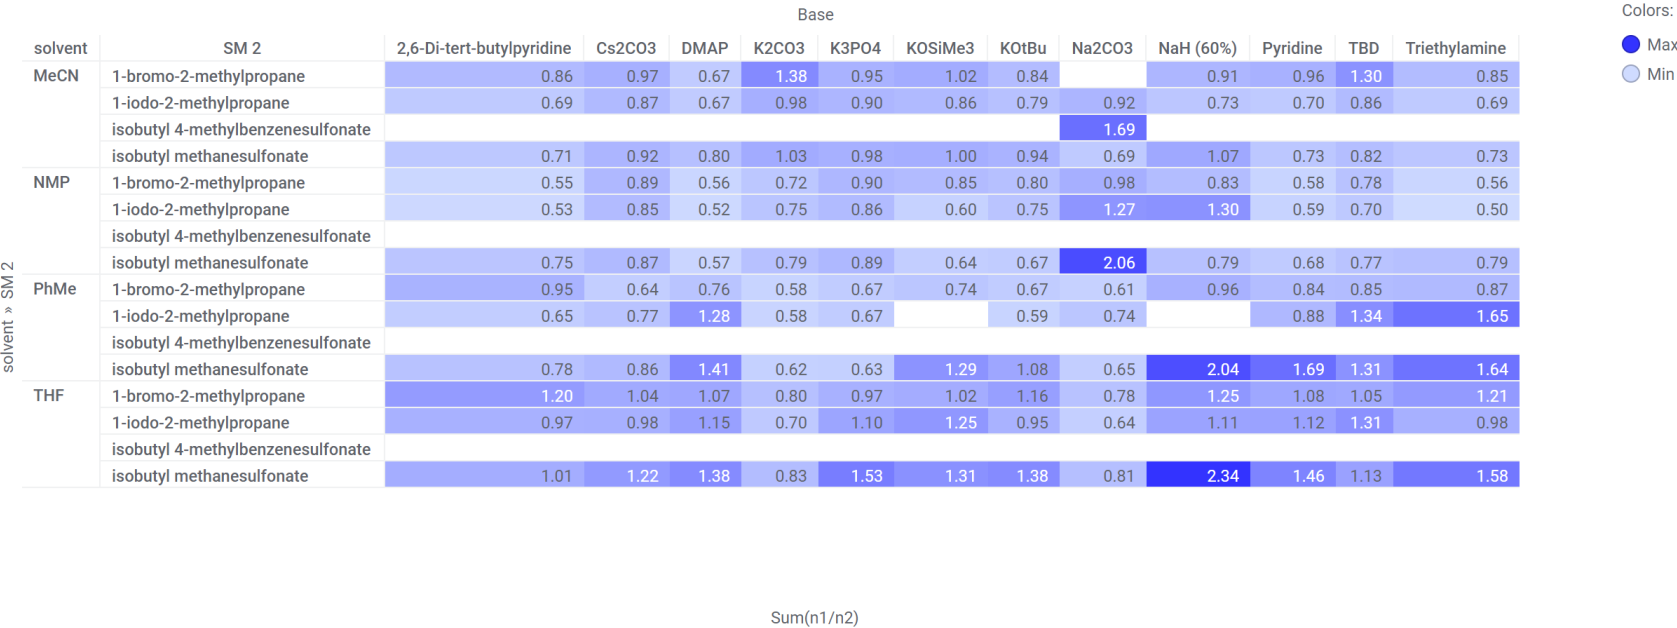

Avg(%N) per pie title

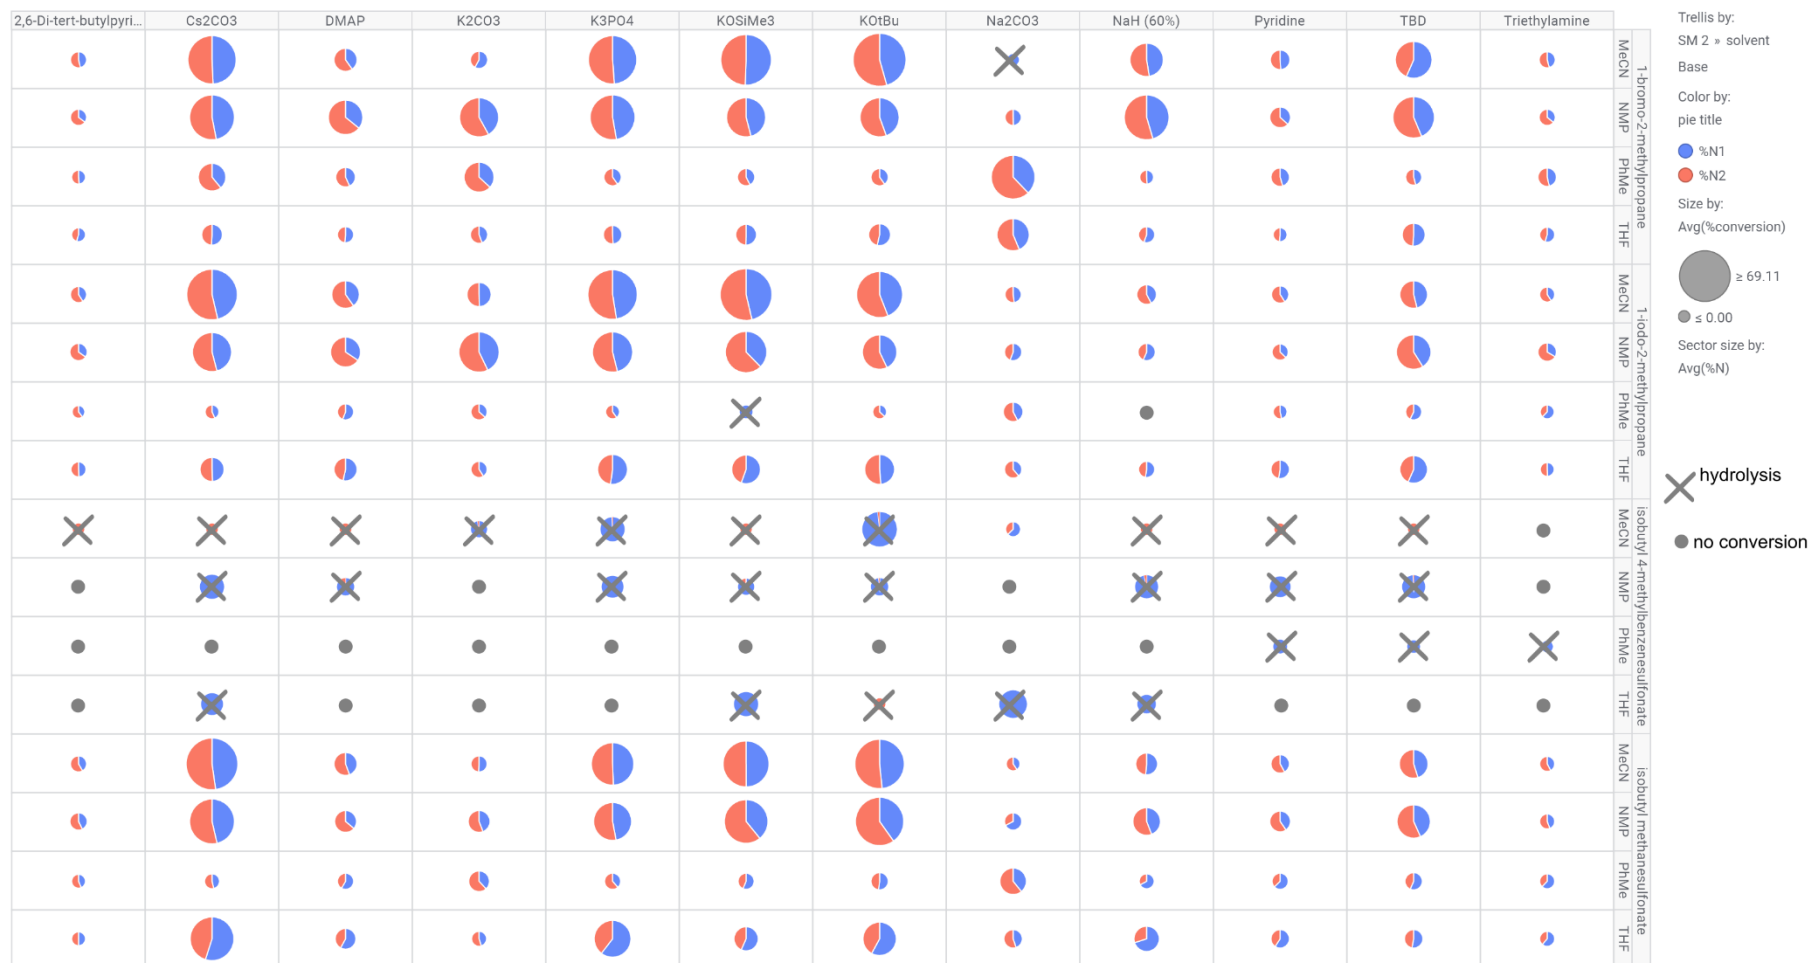

Pie chart array visualization of results. Pies sized by conversion.

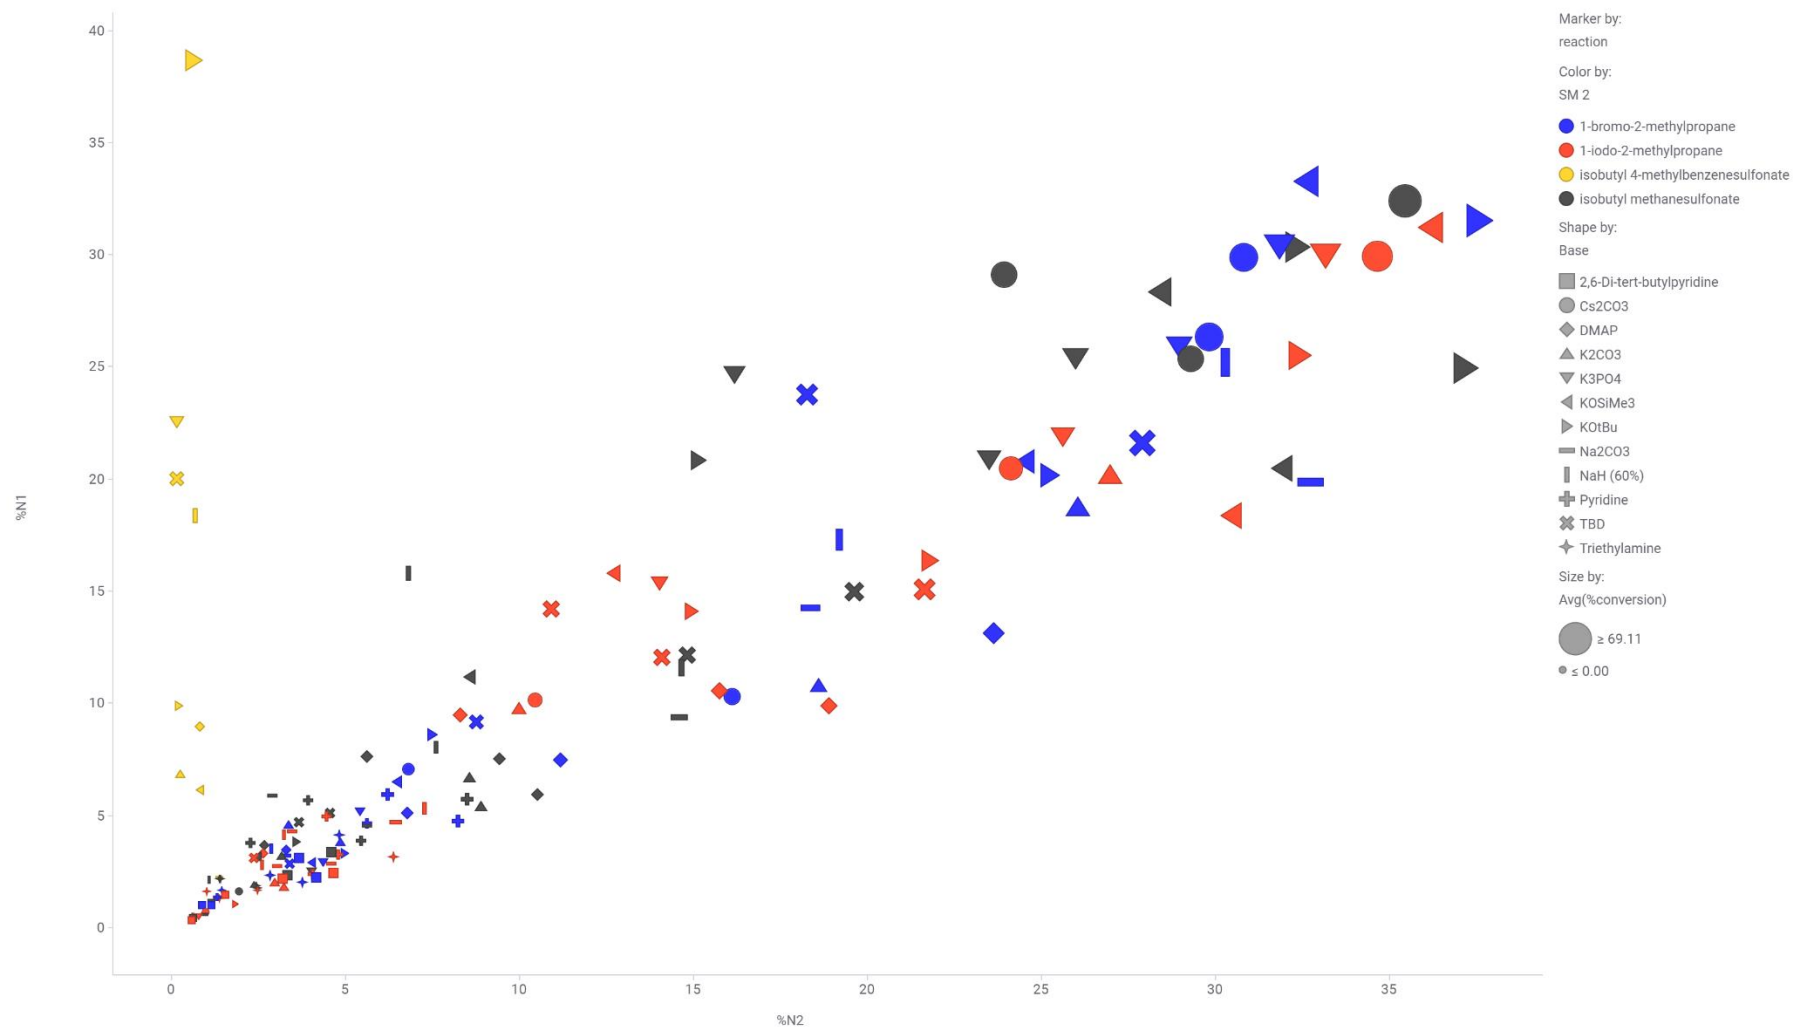

%N1 vs. %N2 scatter. Colours correspond to reagent. Shapes correspond to bases. Sized by conversion. Outliers due to hydrolysis side products.

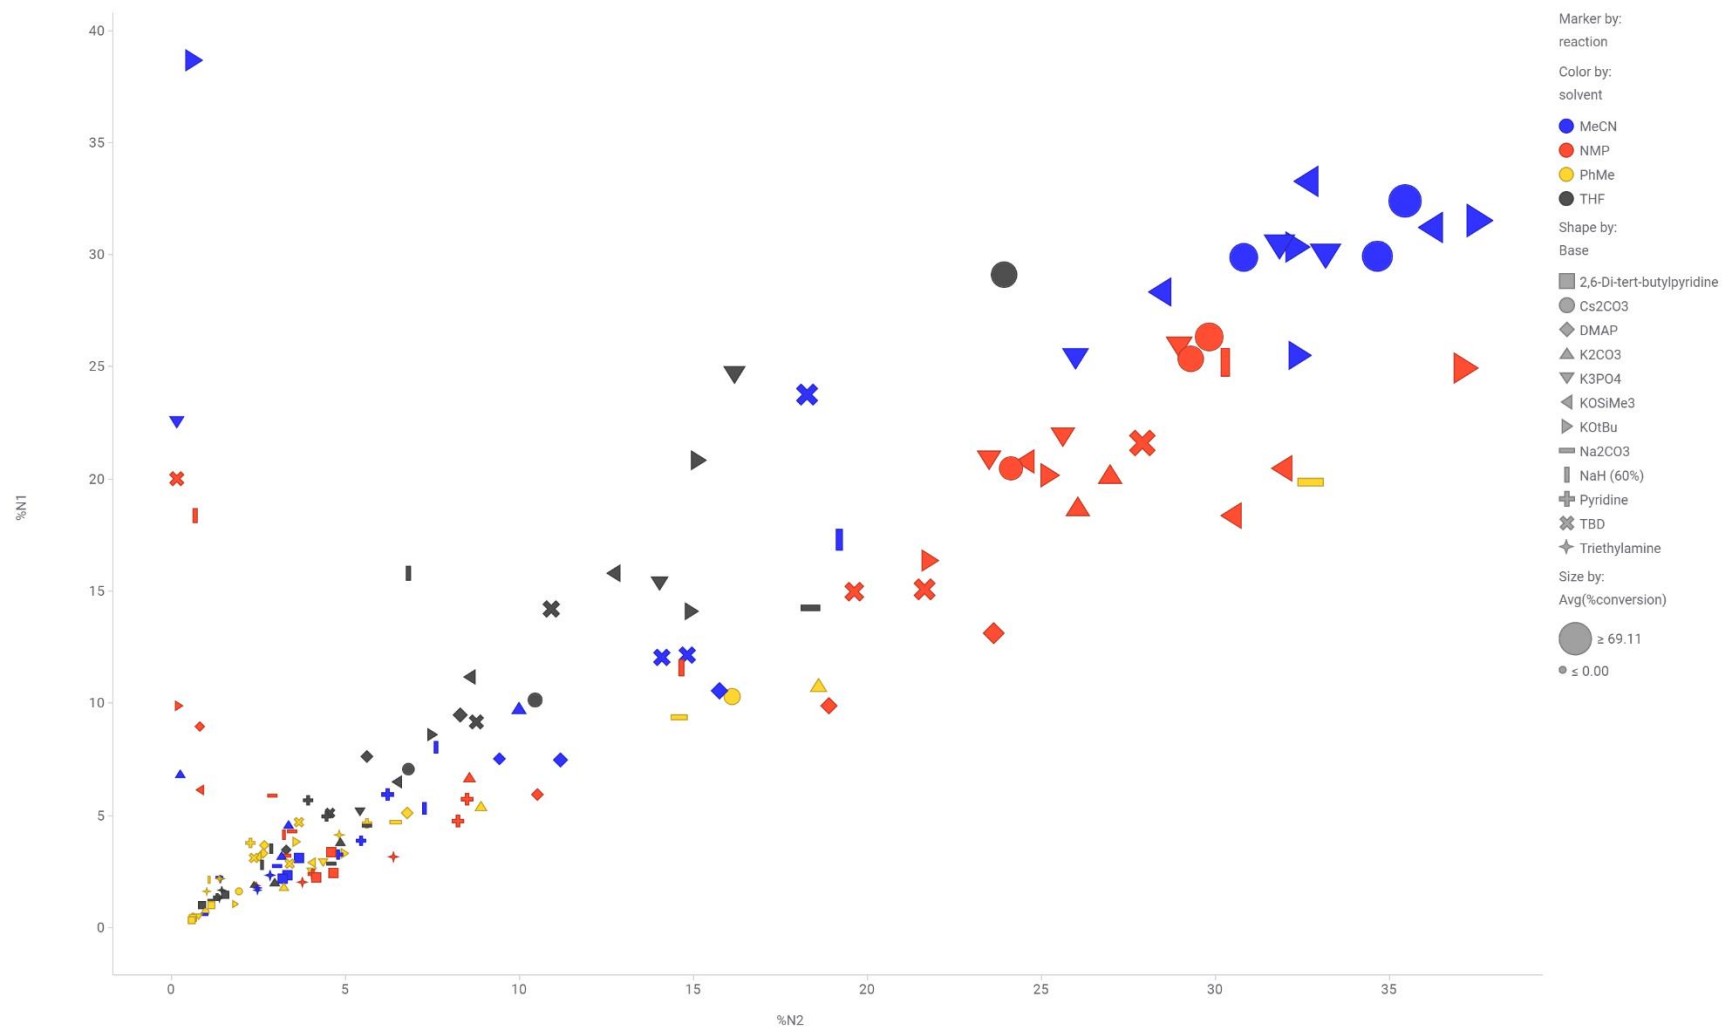

%N1 vs. %N2 scatter. Colours correspond to solvent. Shapes correspond to bases. Sized by conversion. Outliers due to hydrolysis side products.

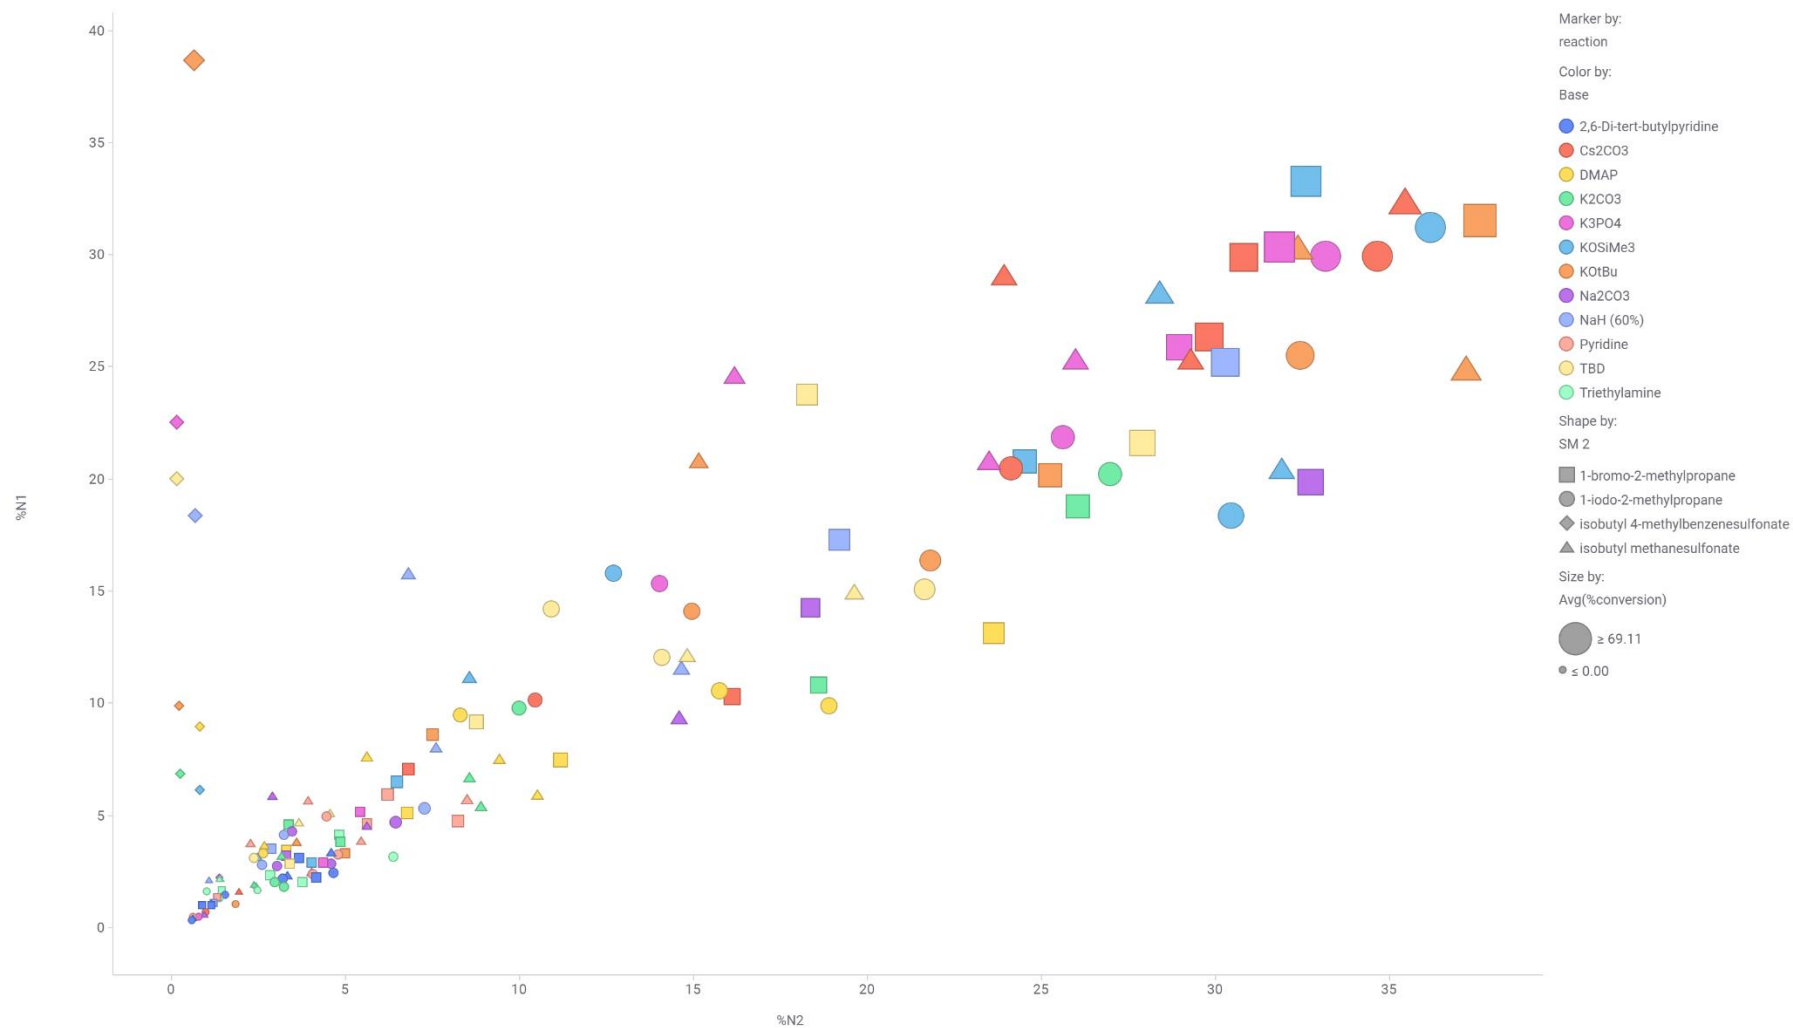

%N1 vs. %N2 scatter. Colours correspond to bases. Shapes correspond to reagents. Sized by conversion. Outliers due to hydrolysis side products.

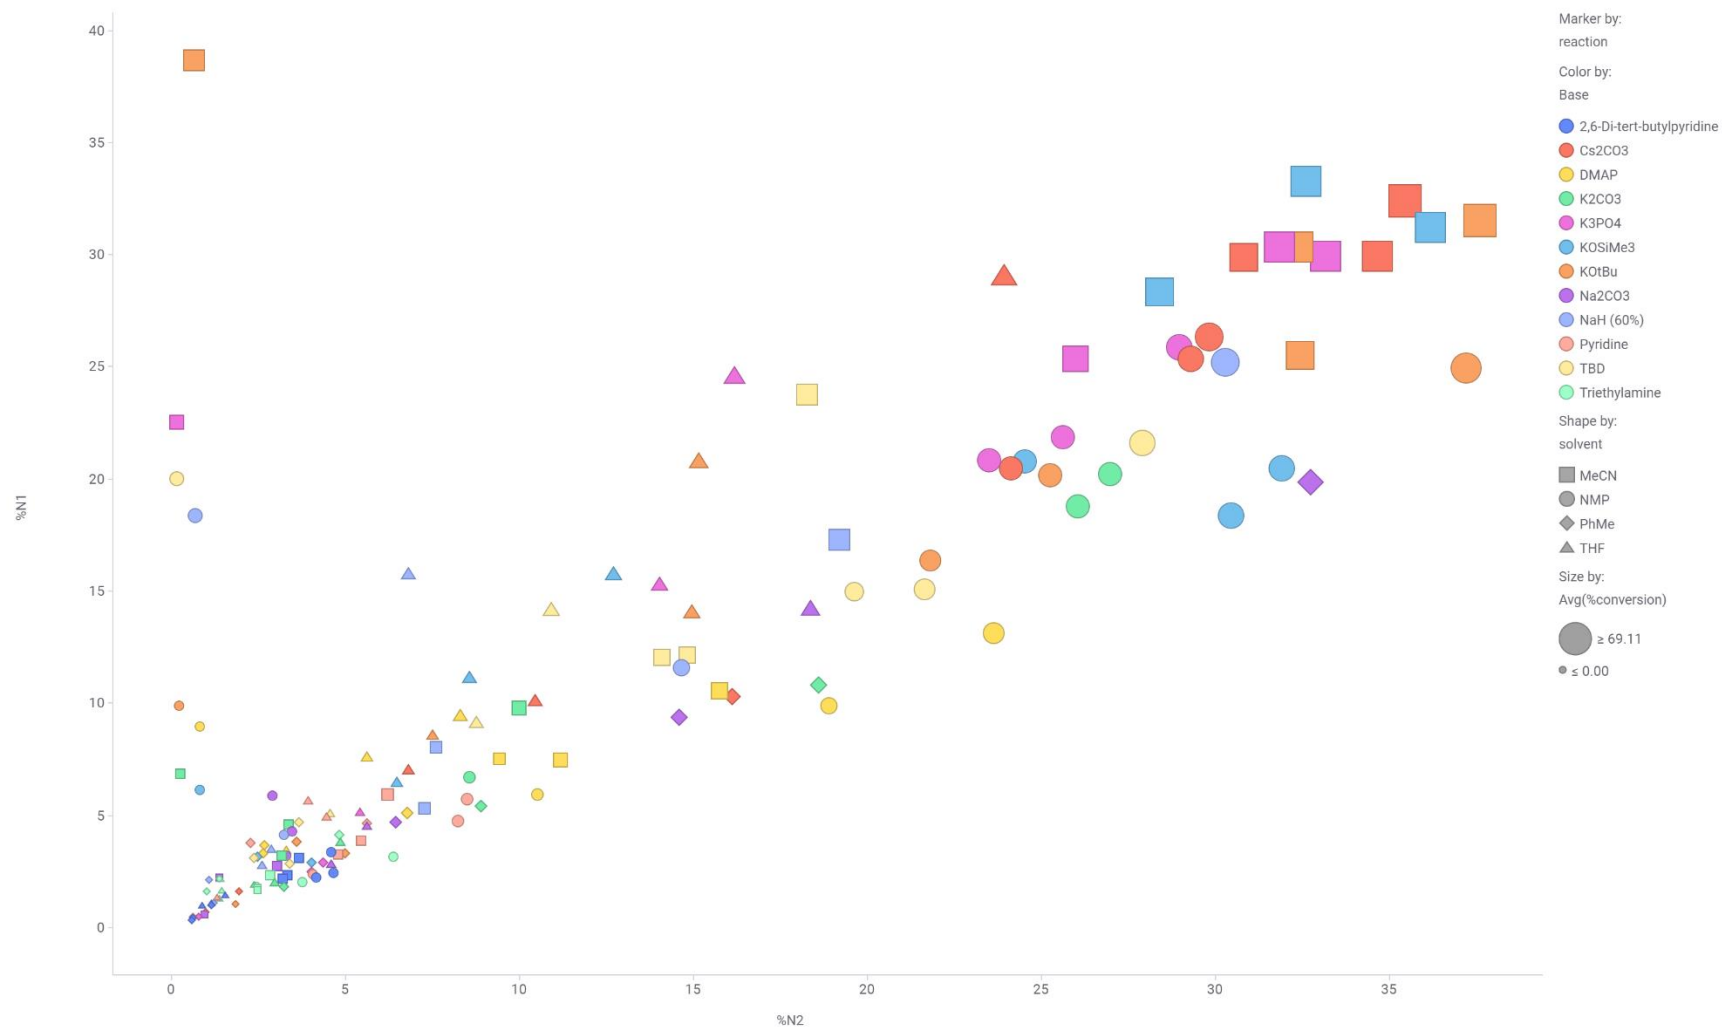

%N1 vs. %N2 scatter. Colours correspond to bases. Shapes correspond to solvent. Sized by conversion. Outliers due to hydrolysis side products.

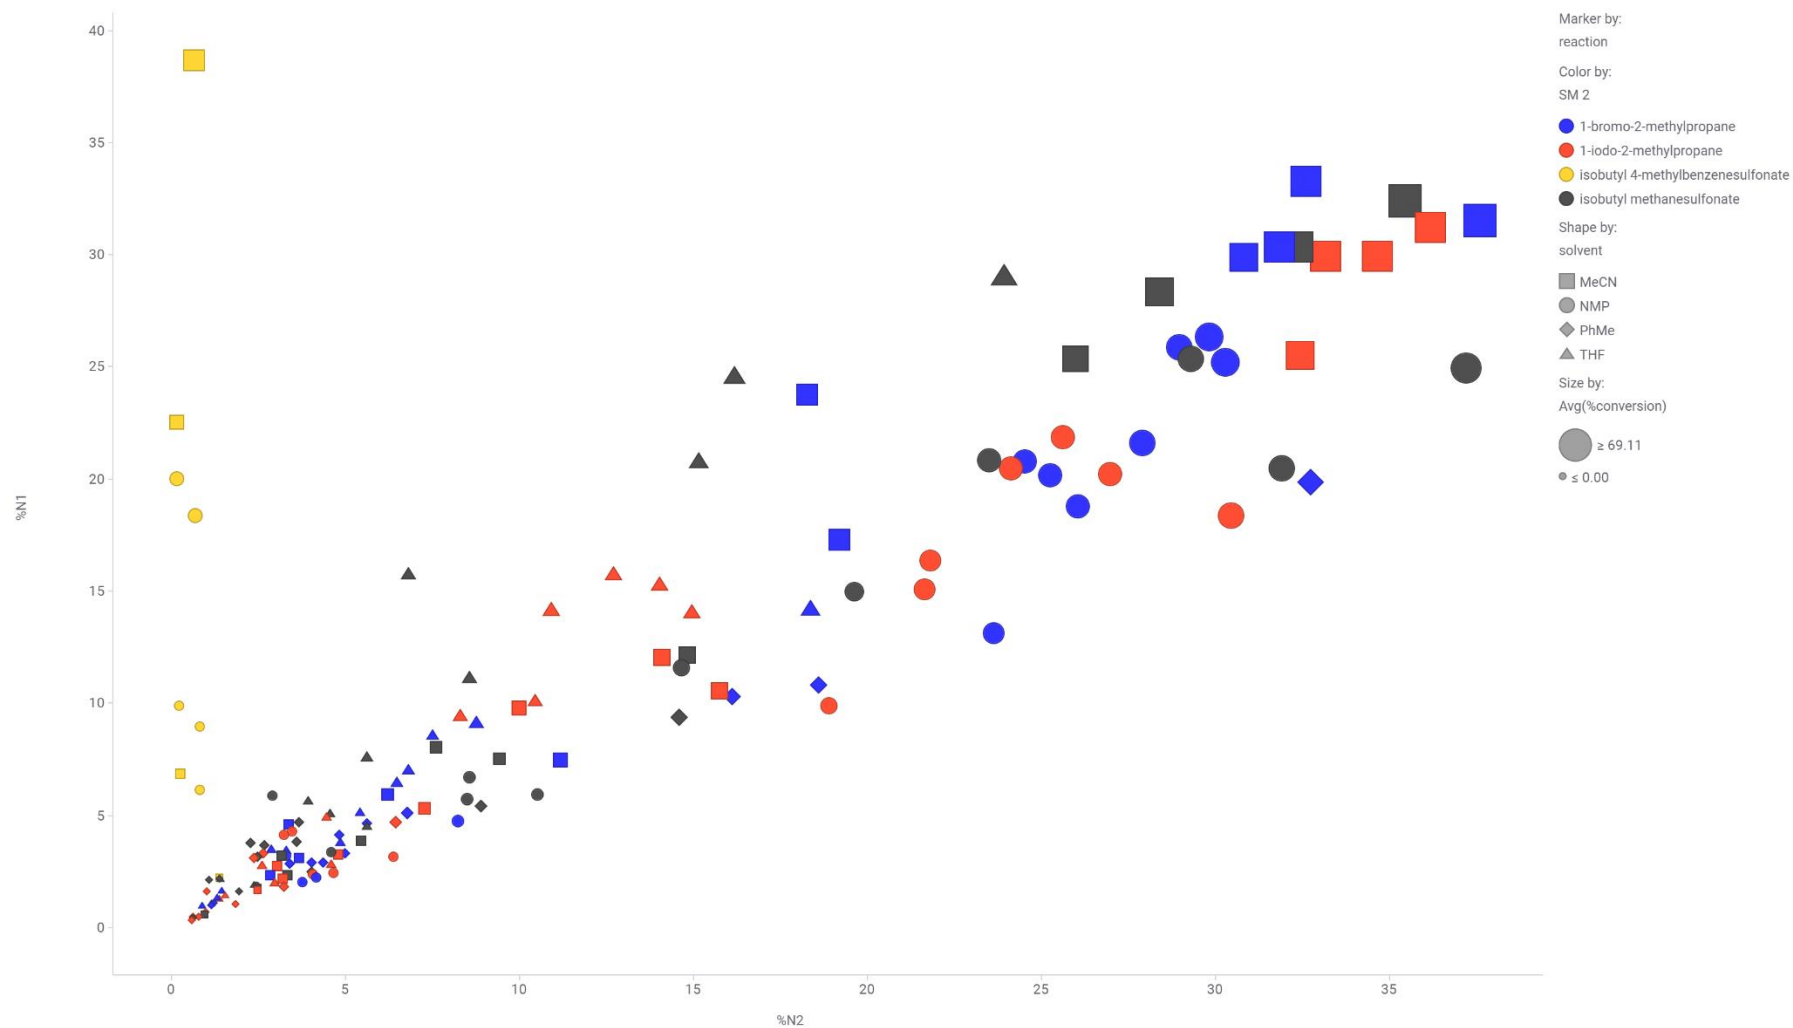

%N1 vs. %N2 scatter. Colours correspond to reagent. Shapes correspond to solvents. Sized by conversion. Outliers due to hydrolysis side products.

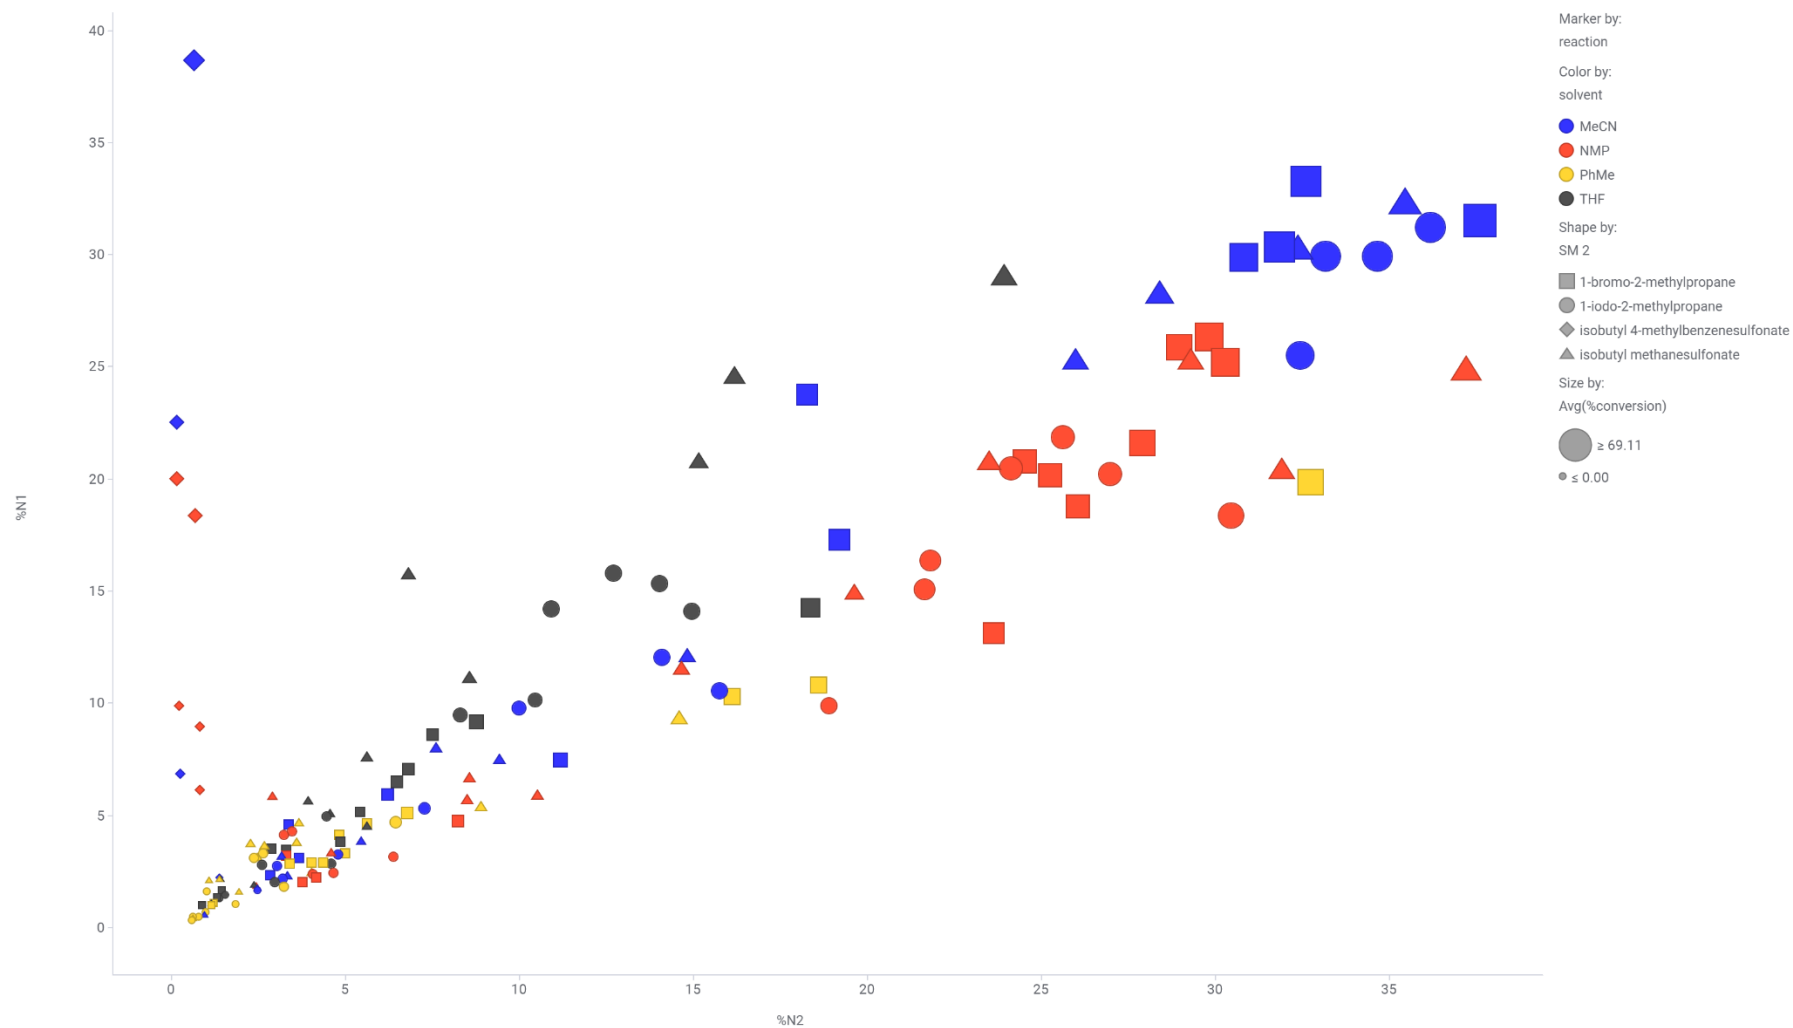

%N1 vs. %N2 scatter. Colours correspond to solvent. Shapes correspond to reagent. Sized by conversion. Outliers due to hydrolysis side products.

## Raw data

| reaction | location | SM 1 | mg | SM 2                    | eq | Base                      | wt% | MW     | D     | eq    | solvent | %N1   | %N2   | %SM   | n1/n2       |
|----------|----------|------|----|-------------------------|----|---------------------------|-----|--------|-------|-------|---------|-------|-------|-------|-------------|
| 1        | A1       | 1a   | 15 | 1-bromo-2-methylpropane | 1  | Na2CO3                    | 1   | 105.99 | 1.000 | 1.100 | MeCN    | 0.44  |       |       | Hydrolysis  |
| 2        | A2       | 1a   | 15 | 1-bromo-2-methylpropane | 1  | K2CO3                     | 1   | 138.21 | 1.000 | 1.100 | MeCN    | 4.61  | 3.33  | 79.13 | 1.384384384 |
| 3        | A3       | 1a   | 15 | 1-bromo-2-methylpropane | 1  | Cs2CO3                    | 1   | 325.82 | 1     | 1.100 | MeCN    | 29.92 | 30.78 | 32.83 | 0.972059779 |
| 4        | A4       | 1a   | 15 | 1-bromo-2-methylpropane | 1  | K3PO4                     | 1   | 212.27 | 1     | 1.100 | MeCN    | 30.35 | 31.82 | 28.55 | 0.95380264  |
| 5        | A5       | 1a   | 15 | 1-bromo-2-methylpropane | 1  | KOtBu                     | 1   | 112.22 | 1.000 | 1.100 | MeCN    | 31.53 | 37.58 | 12.68 | 0.839010112 |
| 6        | A6       | 1a   | 15 | 1-bromo-2-methylpropane | 1  | KOSiMe3                   | 1   | 128.29 | 1     | 1.100 | MeCN    | 33.29 | 32.59 | 22.88 | 1.021478981 |
| 7        | A7       | 1a   | 15 | 1-bromo-2-methylpropane | 1  | DMAP                      | 1   | 122.17 | 1     | 1.100 | MeCN    | 7.51  | 11.14 | 67.9  | 0.674147217 |
| 8        | A8       | 1a   | 15 | 1-bromo-2-methylpropane | 1  | TBD                       | 1   | 139.2  | 1     | 1.100 | MeCN    | 23.78 | 18.23 | 35.3  | 1.304443225 |
| 9        | A9       | 1a   | 15 | 1-bromo-2-methylpropane | 1  | Pyridine                  | 1   | 79.1   | 0.973 | 1.100 | MeCN    | 5.95  | 6.17  | 80.64 | 0.964343598 |
| 10       | A10      | 1a   | 15 | 1-bromo-2-methylpropane | 1  | 2,6-Di-tert-butylpyridine | 1   | 191.31 | 0.852 | 1.100 | MeCN    | 3.12  | 3.62  | 83.85 | 0.861878453 |
| 11       | A11      | 1a   | 15 | 1-bromo-2-methylpropane | 1  | Triethylamine             | 1   | 101.19 | 0.726 | 1.100 | MeCN    | 2.38  | 2.81  | 84.4  | 0.846975089 |
| 12       | A12      | 1a   | 15 | 1-bromo-2-methylpropane | 1  | NaH (60%)                 | 0.6 | 24     | 1     | 1.100 | MeCN    | 17.34 | 19.16 | 33.01 | 0.905010438 |
| 13       | B1       | 1a   | 15 | 1-bromo-2-methylpropane | 1  | Na2CO3                    | 1   | 105.99 | 1.000 | 1.100 | THF     | 14.27 | 18.33 | 42.03 | 0.778505183 |
| 14       | B2       | 1a   | 15 | 1-bromo-2-methylpropane | 1  | K2CO3                     | 1   | 138.21 | 1.000 | 1.100 | THF     | 3.85  | 4.81  | 70.48 | 0.8004158   |
| 15       | B3       | 1a   | 15 | 1-bromo-2-methylpropane | 1  | Cs2CO3                    | 1   | 325.82 | 1     | 1.100 | THF     | 7.07  | 6.79  | 59.39 | 1.041237113 |
| 16       | B4       | 1a   | 15 | 1-bromo-2-methylpropane | 1  | K3PO4                     | 1   | 212.27 | 1     | 1.100 | THF     | 5.21  | 5.38  | 60.45 | 0.968401487 |
| 17       | B5       | 1a   | 15 | 1-bromo-2-methylpropane | 1  | KOtBu                     | 1   | 112.22 | 1.000 | 1.100 | THF     | 8.65  | 7.46  | 58.48 | 1.159517426 |
| 18       | B6       | 1a   | 15 | 1-bromo-2-methylpropane | 1  | KOSiMe3                   | 1   | 128.29 | 1     | 1.100 | THF     | 6.53  | 6.43  | 22.82 | 1.0155521   |
| 19       | B7       | 1a   | 15 | 1-bromo-2-methylpropane | 1  | DMAP                      | 1   | 122.17 | 1     | 1.100 | THF     | 3.51  | 3.28  | 30.41 | 1.070121951 |
| 20       | B8       | 1a   | 15 | 1-bromo-2-methylpropane | 1  | TBD                       | 1   | 139.2  | 1     | 1.100 | THF     | 9.2   | 8.74  | 63.84 | 1.052631579 |
| 21       | B9       | 1a   | 15 | 1-bromo-2-methylpropane | 1  | Pyridine                  | 1   | 79.1   | 0.973 | 1.100 | THF     | 1.39  | 1.29  | 85.05 | 1.07751938  |
| 22       | B10      | 1a   | 15 | 1-bromo-2-methylpropane | 1  | 2,6-Di-tert-butylpyridine | 1   | 191.31 | 0.852 | 1.100 | THF     | 1.01  | 0.84  | 86.47 | 1.202380952 |
| 23       | B11      | 1a   | 15 | 1-bromo-2-methylpropane | 1  | Triethylamine             | 1   | 101.19 | 0.726 | 1.100 | THF     | 1.72  | 1.42  | 53.56 | 1.211267606 |
| 24       | B12      | 1a   | 15 | 1-bromo-2-methylpropane | 1  | NaH (60%)                 | 0.6 | 24     | 1     | 1.100 | THF     | 3.54  | 2.83  | 47.2  | 1.250883392 |
| 25       | C1       | 1a   | 15 | 1-bromo-2-methylpropane | 1  | Na2CO3                    | 1   | 105.99 | 1.000 | 1.100 | NMP     | 3.23  | 3.28  | 43.13 | 0.984756098 |
| 26       | C2       | 1a   | 15 | 1-bromo-2-methylpropane | 1  | K2CO3                     | 1   | 138.21 | 1.000 | 1.100 | NMP     | 18.83 | 26.03 | 14.61 | 0.723396081 |
| 27       | C3       | 1a   | 15 | 1-bromo-2-methylpropane | 1  | Cs2CO3                    | 1   | 325.82 | 1     | 1.100 | NMP     | 26.38 | 29.79 | 1.59  | 0.885532058 |

|    |     |    |    |                         |   |                           |     |        |       |       |      |       |       |       |             |
|----|-----|----|----|-------------------------|---|---------------------------|-----|--------|-------|-------|------|-------|-------|-------|-------------|
| 28 | C4  | 1a | 15 | 1-bromo-2-methylpropane | 1 | K3PO4                     | 1   | 212.27 | 1     | 1.100 | NMP  | 25.92 | 28.94 | 5.3   | 0.895646164 |
| 29 | C5  | 1a | 15 | 1-bromo-2-methylpropane | 1 | KOtBu                     | 1   | 112.22 | 1.000 | 1.100 | NMP  | 20.19 | 25.22 | 11.35 | 0.800555115 |
| 30 | C6  | 1a | 15 | 1-bromo-2-methylpropane | 1 | KOSiMe3                   | 1   | 128.29 | 1     | 1.100 | NMP  | 20.82 | 24.49 | 17.41 | 0.850142915 |
| 31 | C7  | 1a | 15 | 1-bromo-2-methylpropane | 1 | DMAP                      | 1   | 122.17 | 1     | 1.100 | NMP  | 13.16 | 23.6  | 33.14 | 0.557627119 |
| 32 | C8  | 1a | 15 | 1-bromo-2-methylpropane | 1 | TBD                       | 1   | 139.2  | 1     | 1.100 | NMP  | 21.65 | 27.89 | 14.78 | 0.776263894 |
| 33 | C9  | 1a | 15 | 1-bromo-2-methylpropane | 1 | Pyridine                  | 1   | 79.1   | 0.973 | 1.100 | NMP  | 4.79  | 8.2   | 48.09 | 0.584146341 |
| 34 | C10 | 1a | 15 | 1-bromo-2-methylpropane | 1 | 2,6-Di-tert-butylpyridine | 1   | 191.31 | 0.852 | 1.100 | NMP  | 2.26  | 4.13  | 46.33 | 0.547215496 |
| 35 | C11 | 1a | 15 | 1-bromo-2-methylpropane | 1 | Triethylamine             | 1   | 101.19 | 0.726 | 1.100 | NMP  | 2.08  | 3.73  | 55.96 | 0.557640751 |
| 36 | C12 | 1a | 15 | 1-bromo-2-methylpropane | 1 | NaH (60%)                 | 0.6 | 24     | 1     | 1.100 | NMP  | 25.23 | 30.26 | 6.53  | 0.833773959 |
| 37 | D1  | 1a | 15 | 1-bromo-2-methylpropane | 1 | Na2CO3                    | 1   | 105.99 | 1.000 | 1.100 | PhMe | 19.91 | 32.7  | 24.12 | 0.608868502 |
| 38 | D2  | 1a | 15 | 1-bromo-2-methylpropane | 1 | K2CO3                     | 1   | 138.21 | 1.000 | 1.100 | PhMe | 10.85 | 18.57 | 42.35 | 0.584275714 |
| 39 | D3  | 1a | 15 | 1-bromo-2-methylpropane | 1 | Cs2CO3                    | 1   | 325.82 | 1     | 1.100 | PhMe | 10.32 | 16.09 | 43.84 | 0.641392169 |
| 40 | D4  | 1a | 15 | 1-bromo-2-methylpropane | 1 | K3PO4                     | 1   | 212.27 | 1     | 1.100 | PhMe | 2.91  | 4.34  | 21.93 | 0.670506912 |
| 41 | D5  | 1a | 15 | 1-bromo-2-methylpropane | 1 | KOtBu                     | 1   | 112.22 | 1.000 | 1.100 | PhMe | 3.32  | 4.95  | 59.44 | 0.670707071 |
| 42 | D6  | 1a | 15 | 1-bromo-2-methylpropane | 1 | KOSiMe3                   | 1   | 128.29 | 1     | 1.100 | PhMe | 2.95  | 4     | 45.4  | 0.7375      |
| 43 | D7  | 1a | 15 | 1-bromo-2-methylpropane | 1 | DMAP                      | 1   | 122.17 | 1     | 1.100 | PhMe | 5.13  | 6.74  | 39.12 | 0.761127596 |
| 44 | D8  | 1a | 15 | 1-bromo-2-methylpropane | 1 | TBD                       | 1   | 139.2  | 1     | 1.100 | PhMe | 2.86  | 3.38  | 34.99 | 0.846153846 |
| 45 | D9  | 1a | 15 | 1-bromo-2-methylpropane | 1 | Pyridine                  | 1   | 79.1   | 0.973 | 1.100 | PhMe | 4.67  | 5.59  | 44.25 | 0.835420394 |
| 46 | D10 | 1a | 15 | 1-bromo-2-methylpropane | 1 | 2,6-Di-tert-butylpyridine | 1   | 191.31 | 0.852 | 1.100 | PhMe | 1.04  | 1.1   | 77.4  | 0.945454545 |
| 47 | D11 | 1a | 15 | 1-bromo-2-methylpropane | 1 | Triethylamine             | 1   | 101.19 | 0.726 | 1.100 | PhMe | 4.14  | 4.78  | 47.09 | 0.866108787 |
| 48 | D12 | 1a | 15 | 1-bromo-2-methylpropane | 1 | NaH (60%)                 | 0.6 | 24     | 1     | 1.100 | PhMe | 1.14  | 1.19  | 68.67 | 0.957983193 |
| 49 | E1  | 1a | 15 | 1-iodo-2-methylpropane  | 1 | Na2CO3                    | 1   | 105.99 | 1.000 | 1.100 | MeCN | 2.76  | 3     | 66.64 | 0.92        |
| 50 | E2  | 1a | 15 | 1-iodo-2-methylpropane  | 1 | K2CO3                     | 1   | 138.21 | 1.000 | 1.100 | MeCN | 9.79  | 9.96  | 69.65 | 0.982931727 |
| 51 | E3  | 1a | 15 | 1-iodo-2-methylpropane  | 1 | Cs2CO3                    | 1   | 325.82 | 1     | 1.100 | MeCN | 29.95 | 34.62 | 25.64 | 0.865106875 |
| 52 | E4  | 1a | 15 | 1-iodo-2-methylpropane  | 1 | K3PO4                     | 1   | 212.27 | 1     | 1.100 | MeCN | 29.96 | 33.14 | 30.96 | 0.904043452 |
| 53 | E5  | 1a | 15 | 1-iodo-2-methylpropane  | 1 | KOtBu                     | 1   | 112.22 | 1.000 | 1.100 | MeCN | 25.54 | 32.4  | 30.93 | 0.788271605 |
| 54 | E6  | 1a | 15 | 1-iodo-2-methylpropane  | 1 | KOSiMe3                   | 1   | 128.29 | 1     | 1.100 | MeCN | 31.24 | 36.16 | 16.58 | 0.863938053 |
| 55 | E7  | 1a | 15 | 1-iodo-2-methylpropane  | 1 | DMAP                      | 1   | 122.17 | 1     | 1.100 | MeCN | 10.6  | 15.71 | 55.1  | 0.674729472 |
| 56 | E8  | 1a | 15 | 1-iodo-2-methylpropane  | 1 | TBD                       | 1   | 139.2  | 1     | 1.100 | MeCN | 12.05 | 14.05 | 59.99 | 0.857651246 |
| 57 | E9  | 1a | 15 | 1-iodo-2-methylpropane  | 1 | Pyridine                  | 1   | 79.1   | 0.973 | 1.100 | MeCN | 3.31  | 4.76  | 85.22 | 0.695378151 |

|    |     |    |    |                        |   |                           |     |        |       |       |      |       |       |       |             |
|----|-----|----|----|------------------------|---|---------------------------|-----|--------|-------|-------|------|-------|-------|-------|-------------|
| 58 | E10 | 1a | 15 | 1-iodo-2-methylpropane | 1 | 2,6-Di-tert-butylpyridine | 1   | 191.31 | 0.852 | 1.100 | MeCN | 2.21  | 3.18  | 86.27 | 0.694968553 |
| 59 | E11 | 1a | 15 | 1-iodo-2-methylpropane | 1 | Triethylamine             | 1   | 101.19 | 0.726 | 1.100 | MeCN | 1.69  | 2.44  | 86.68 | 0.692622951 |
| 60 | E12 | 1a | 15 | 1-iodo-2-methylpropane | 1 | NaH (60%)                 | 0.6 | 24     | 1     | 1.100 | MeCN | 5.32  | 7.25  | 36.95 | 0.733793103 |
| 61 | F1  | 1a | 15 | 1-iodo-2-methylpropane | 1 | Na2CO3                    | 1   | 105.99 | 1.000 | 1.100 | THF  | 2.9   | 4.56  | 35.19 | 0.635964912 |
| 62 | F2  | 1a | 15 | 1-iodo-2-methylpropane | 1 | K2CO3                     | 1   | 138.21 | 1.000 | 1.100 | THF  | 2.04  | 2.93  | 54.99 | 0.696245734 |
| 63 | F3  | 1a | 15 | 1-iodo-2-methylpropane | 1 | Cs2CO3                    | 1   | 325.82 | 1     | 1.100 | THF  | 10.16 | 10.41 | 38.97 | 0.97598463  |
| 64 | F4  | 1a | 15 | 1-iodo-2-methylpropane | 1 | K3PO4                     | 1   | 212.27 | 1     | 1.100 | THF  | 15.38 | 14    | 47.89 | 1.098571429 |
| 65 | F5  | 1a | 15 | 1-iodo-2-methylpropane | 1 | KOtBu                     | 1   | 112.22 | 1.000 | 1.100 | THF  | 14.14 | 14.91 | 48.83 | 0.948356808 |
| 66 | F6  | 1a | 15 | 1-iodo-2-methylpropane | 1 | KOSiMe3                   | 1   | 128.29 | 1     | 1.100 | THF  | 15.84 | 12.68 | 47.49 | 1.249211356 |
| 67 | F7  | 1a | 15 | 1-iodo-2-methylpropane | 1 | DMAP                      | 1   | 122.17 | 1     | 1.100 | THF  | 9.52  | 8.26  | 28.4  | 1.152542373 |
| 68 | F8  | 1a | 15 | 1-iodo-2-methylpropane | 1 | TBD                       | 1   | 139.2  | 1     | 1.100 | THF  | 14.21 | 10.87 | 63.26 | 1.307267709 |
| 69 | F9  | 1a | 15 | 1-iodo-2-methylpropane | 1 | Pyridine                  | 1   | 79.1   | 0.973 | 1.100 | THF  | 4.98  | 4.43  | 42.27 | 1.124153499 |
| 70 | F10 | 1a | 15 | 1-iodo-2-methylpropane | 1 | 2,6-Di-tert-butylpyridine | 1   | 191.31 | 0.852 | 1.100 | THF  | 1.47  | 1.52  | 88.23 | 0.967105263 |
| 71 | F11 | 1a | 15 | 1-iodo-2-methylpropane | 1 | Triethylamine             | 1   | 101.19 | 0.726 | 1.100 | THF  | 1.33  | 1.36  | 69.58 | 0.977941176 |
| 72 | F12 | 1a | 15 | 1-iodo-2-methylpropane | 1 | NaH (60%)                 | 0.6 | 24     | 1     | 1.100 | THF  | 2.85  | 2.56  | 29.5  | 1.11328125  |
| 73 | G1  | 1a | 15 | 1-iodo-2-methylpropane | 1 | Na2CO3                    | 1   | 105.99 | 1.000 | 1.100 | NMP  | 4.34  | 3.43  | 28.33 | 1.265306122 |
| 74 | G2  | 1a | 15 | 1-iodo-2-methylpropane | 1 | K2CO3                     | 1   | 138.21 | 1.000 | 1.100 | NMP  | 20.22 | 26.96 | 18.98 | 0.75        |
| 75 | G3  | 1a | 15 | 1-iodo-2-methylpropane | 1 | Cs2CO3                    | 1   | 325.82 | 1     | 1.100 | NMP  | 20.51 | 24.11 | 18.25 | 0.850684363 |
| 76 | G4  | 1a | 15 | 1-iodo-2-methylpropane | 1 | K3PO4                     | 1   | 212.27 | 1     | 1.100 | NMP  | 21.89 | 25.59 | 17.86 | 0.85541227  |
| 77 | G5  | 1a | 15 | 1-iodo-2-methylpropane | 1 | KOtBu                     | 1   | 112.22 | 1.000 | 1.100 | NMP  | 16.4  | 21.79 | 18.33 | 0.752638825 |
| 78 | G6  | 1a | 15 | 1-iodo-2-methylpropane | 1 | KOSiMe3                   | 1   | 128.29 | 1     | 1.100 | NMP  | 18.4  | 30.43 | 18.75 | 0.604666448 |
| 79 | G7  | 1a | 15 | 1-iodo-2-methylpropane | 1 | DMAP                      | 1   | 122.17 | 1     | 1.100 | NMP  | 9.9   | 18.86 | 23.66 | 0.524920467 |
| 80 | G8  | 1a | 15 | 1-iodo-2-methylpropane | 1 | TBD                       | 1   | 139.2  | 1     | 1.100 | NMP  | 15.13 | 21.63 | 26.99 | 0.699491447 |
| 81 | G9  | 1a | 15 | 1-iodo-2-methylpropane | 1 | Pyridine                  | 1   | 79.1   | 0.973 | 1.100 | NMP  | 2.4   | 4.04  | 44.79 | 0.594059406 |
| 82 | G10 | 1a | 15 | 1-iodo-2-methylpropane | 1 | 2,6-Di-tert-butylpyridine | 1   | 191.31 | 0.852 | 1.100 | NMP  | 2.47  | 4.63  | 56.69 | 0.533477322 |
| 83 | G11 | 1a | 15 | 1-iodo-2-methylpropane | 1 | Triethylamine             | 1   | 101.19 | 0.726 | 1.100 | NMP  | 3.2   | 6.34  | 52.08 | 0.504731861 |
| 84 | G12 | 1a | 15 | 1-iodo-2-methylpropane | 1 | NaH (60%)                 | 0.6 | 24     | 1     | 1.100 | NMP  | 4.16  | 3.2   | 26.28 | 1.3         |
| 85 | H1  | 1a | 15 | 1-iodo-2-methylpropane | 1 | Na2CO3                    | 1   | 105.99 | 1.000 | 1.100 | PhMe | 4.71  | 6.4   | 28.39 | 0.7359375   |
| 86 | H2  | 1a | 15 | 1-iodo-2-methylpropane | 1 | K2CO3                     | 1   | 138.21 | 1.000 | 1.100 | PhMe | 1.85  | 3.19  | 55.88 | 0.579937304 |

|     |     |    |    |                           |   |                           |     |        |       |       |      |       |       |       |             |
|-----|-----|----|----|---------------------------|---|---------------------------|-----|--------|-------|-------|------|-------|-------|-------|-------------|
| 87  | H3  | 1a | 15 | 1-iodo-2-methylpropane    | 1 | Cs2CO3                    | 1   | 325.82 | 1     | 1.100 | PhMe | 0.73  | 0.95  | 69.11 | 0.768421053 |
| 88  | H4  | 1a | 15 | 1-iodo-2-methylpropane    | 1 | K3PO4                     | 1   | 212.27 | 1     | 1.100 | PhMe | 0.5   | 0.75  | 59.54 | 0.666666667 |
| 89  | H5  | 1a | 15 | 1-iodo-2-methylpropane    | 1 | KOtBu                     | 1   | 112.22 | 1.000 | 1.100 | PhMe | 1.06  | 1.81  | 51.42 | 0.585635359 |
| 90  | H6  | 1a | 15 | 1-iodo-2-methylpropane    | 1 | KOSiMe3                   | 1   | 128.29 | 1     | 1.100 | PhMe | 2.4   |       |       | Hydrolysis  |
| 91  | H7  | 1a | 15 | 1-iodo-2-methylpropane    | 1 | DMAP                      | 1   | 122.17 | 1     | 1.100 | PhMe | 3.33  | 2.61  | 26.15 | 1.275862069 |
| 92  | H8  | 1a | 15 | 1-iodo-2-methylpropane    | 1 | TBD                       | 1   | 139.2  | 1     | 1.100 | PhMe | 3.14  | 2.34  | 21.28 | 1.341880342 |
| 93  | H9  | 1a | 15 | 1-iodo-2-methylpropane    | 1 | Pyridine                  | 1   | 79.1   | 0.973 | 1.100 | PhMe | 0.52  | 0.59  | 62.81 | 0.881355932 |
| 94  | H10 | 1a | 15 | 1-iodo-2-methylpropane    | 1 | 2,6-Di-tert-butylpyridine | 1   | 191.31 | 0.852 | 1.100 | PhMe | 0.36  | 0.55  | 77.68 | 0.654545455 |
| 95  | H11 | 1a | 15 | 1-iodo-2-methylpropane    | 1 | Triethylamine             | 1   | 101.19 | 0.726 | 1.100 | PhMe | 1.62  | 0.98  | 51.16 | 1.653061224 |
| 96  | H12 | 1a | 15 | 1-iodo-2-methylpropane    | 1 | NaH (60%)                 | 0.6 | 24     | 1     | 1.100 | PhMe | 0     |       | 31.52 | no reaction |
| 97  | A1  | 1a | 15 | isobutyl methanesulfonate | 1 | Na2CO3                    | 1   | 105.99 | 1.000 | 1.100 | MeCN | 0.64  | 0.93  | 83.46 | 0.688172043 |
| 98  | A2  | 1a | 15 | isobutyl methanesulfonate | 1 | K2CO3                     | 1   | 138.21 | 1.000 | 1.100 | MeCN | 3.25  | 3.15  | 76.15 | 1.031746032 |
| 99  | A3  | 1a | 15 | isobutyl methanesulfonate | 1 | Cs2CO3                    | 1   | 325.82 | 1     | 1.100 | MeCN | 32.41 | 35.42 | 24.87 | 0.915019763 |
| 100 | A4  | 1a | 15 | isobutyl methanesulfonate | 1 | K3PO4                     | 1   | 212.27 | 1     | 1.100 | MeCN | 25.38 | 25.94 | 32.39 | 0.978411719 |
| 101 | A5  | 1a | 15 | isobutyl methanesulfonate | 1 | KOtBu                     | 1   | 112.22 | 1.000 | 1.100 | MeCN | 30.37 | 32.35 | 18.51 | 0.938794436 |
| 102 | A6  | 1a | 15 | isobutyl methanesulfonate | 1 | KOSiMe3                   | 1   | 128.29 | 1     | 1.100 | MeCN | 28.35 | 28.38 | 28.71 | 0.998942918 |
| 103 | A7  | 1a | 15 | isobutyl methanesulfonate | 1 | DMAP                      | 1   | 122.17 | 1     | 1.100 | MeCN | 7.53  | 9.41  | 76.09 | 0.80021254  |
| 104 | A8  | 1a | 15 | isobutyl methanesulfonate | 1 | TBD                       | 1   | 139.2  | 1     | 1.100 | MeCN | 12.19 | 14.79 | 43.35 | 0.824205544 |
| 105 | A9  | 1a | 15 | isobutyl methanesulfonate | 1 | Pyridine                  | 1   | 79.1   | 0.973 | 1.100 | MeCN | 3.93  | 5.42  | 81.19 | 0.725092251 |
| 106 | A10 | 1a | 15 | isobutyl methanesulfonate | 1 | 2,6-Di-tert-butylpyridine | 1   | 191.31 | 0.852 | 1.100 | MeCN | 2.35  | 3.3   | 85.49 | 0.712121212 |
| 107 | A11 | 1a | 15 | isobutyl methanesulfonate | 1 | Triethylamine             | 1   | 101.19 | 0.726 | 1.100 | MeCN | 1.79  | 2.45  | 85.43 | 0.730612245 |
| 108 | A12 | 1a | 15 | isobutyl methanesulfonate | 1 | NaH (60%)                 | 0.6 | 24     | 1     | 1.100 | MeCN | 8.07  | 7.57  | 41.74 | 1.066050198 |
| 109 | B1  | 1a | 15 | isobutyl methanesulfonate | 1 | Na2CO3                    | 1   | 105.99 | 1.000 | 1.100 | THF  | 4.55  | 5.59  | 42.73 | 0.813953488 |
| 110 | B2  | 1a | 15 | isobutyl methanesulfonate | 1 | K2CO3                     | 1   | 138.21 | 1.000 | 1.100 | THF  | 1.93  | 2.33  | 60.23 | 0.82832618  |
| 111 | B3  | 1a | 15 | isobutyl methanesulfonate | 1 | Cs2CO3                    | 1   | 325.82 | 1     | 1.100 | THF  | 29.13 | 23.91 | 39.94 | 1.218318695 |
| 112 | B4  | 1a | 15 | isobutyl methanesulfonate | 1 | K3PO4                     | 1   | 212.27 | 1     | 1.100 | THF  | 24.67 | 16.14 | 38.02 | 1.52850062  |
| 113 | B5  | 1a | 15 | isobutyl methanesulfonate | 1 | KOtBu                     | 1   | 112.22 | 1.000 | 1.100 | THF  | 20.86 | 15.14 | 22.75 | 1.377807133 |
| 114 | B6  | 1a | 15 | isobutyl methanesulfonate | 1 | KOSiMe3                   | 1   | 128.29 | 1     | 1.100 | THF  | 11.18 | 8.53  | 14.51 | 1.31066823  |
| 115 | B7  | 1a | 15 | isobutyl methanesulfonate | 1 | DMAP                      | 1   | 122.17 | 1     | 1.100 | THF  | 7.68  | 5.57  | 23.3  | 1.378815081 |

|     |     |    |    |                           |   |                           |     |        |       |       |      |       |       |       |             |
|-----|-----|----|----|---------------------------|---|---------------------------|-----|--------|-------|-------|------|-------|-------|-------|-------------|
| 116 | B8  | 1a | 15 | isobutyl methanesulfonate | 1 | TBD                       | 1   | 139.2  | 1     | 1.100 | THF  | 5.14  | 4.54  | 72.45 | 1.13215859  |
| 117 | B9  | 1a | 15 | isobutyl methanesulfonate | 1 | Pyridine                  | 1   | 79.1   | 0.973 | 1.100 | THF  | 5.69  | 3.91  | 26.86 | 1.455242967 |
| 118 | B10 | 1a | 15 | isobutyl methanesulfonate | 1 | 2,6-Di-tert-butylpyridine | 1   | 191.31 | 0.852 | 1.100 | THF  | 1.11  | 1.1   | 92.71 | 1.009090909 |
| 119 | B11 | 1a | 15 | isobutyl methanesulfonate | 1 | Triethylamine             | 1   | 101.19 | 0.726 | 1.100 | THF  | 2.2   | 1.39  | 57.93 | 1.582733813 |
| 120 | B12 | 1a | 15 | isobutyl methanesulfonate | 1 | NaH (60%)                 | 0.6 | 24     | 1     | 1.100 | THF  | 15.85 | 6.78  | 41.53 | 2.337758112 |
| 121 | C1  | 1a | 15 | isobutyl methanesulfonate | 1 | Na2CO3                    | 1   | 105.99 | 1.000 | 1.100 | NMP  | 5.9   | 2.86  | 30.28 | 2.062937063 |
| 122 | C2  | 1a | 15 | isobutyl methanesulfonate | 1 | K2CO3                     | 1   | 138.21 | 1.000 | 1.100 | NMP  | 6.75  | 8.53  | 39.4  | 0.791324736 |
| 123 | C3  | 1a | 15 | isobutyl methanesulfonate | 1 | Cs2CO3                    | 1   | 325.82 | 1     | 1.100 | NMP  | 25.37 | 29.28 | 3.52  | 0.866461749 |
| 124 | C4  | 1a | 15 | isobutyl methanesulfonate | 1 | K3PO4                     | 1   | 212.27 | 1     | 1.100 | NMP  | 20.84 | 23.47 | 14.63 | 0.887942054 |
| 125 | C5  | 1a | 15 | isobutyl methanesulfonate | 1 | KOtBu                     | 1   | 112.22 | 1.000 | 1.100 | NMP  | 24.97 | 37.18 | 6.12  | 0.671597633 |
| 126 | C6  | 1a | 15 | isobutyl methanesulfonate | 1 | KOSiMe3                   | 1   | 128.29 | 1     | 1.100 | NMP  | 20.49 | 31.88 | 7.79  | 0.64272271  |
| 127 | C7  | 1a | 15 | isobutyl methanesulfonate | 1 | DMAP                      | 1   | 122.17 | 1     | 1.100 | NMP  | 5.96  | 10.5  | 31.71 | 0.567619048 |
| 128 | C8  | 1a | 15 | isobutyl methanesulfonate | 1 | TBD                       | 1   | 139.2  | 1     | 1.100 | NMP  | 15    | 19.6  | 25.11 | 0.765306122 |
| 129 | C9  | 1a | 15 | isobutyl methanesulfonate | 1 | Pyridine                  | 1   | 79.1   | 0.973 | 1.100 | NMP  | 5.75  | 8.45  | 41.83 | 0.680473373 |
| 130 | C10 | 1a | 15 | isobutyl methanesulfonate | 1 | 2,6-Di-tert-butylpyridine | 1   | 191.31 | 0.852 | 1.100 | NMP  | 3.39  | 4.55  | 44.93 | 0.745054945 |
| 131 | C11 | 1a | 15 | isobutyl methanesulfonate | 1 | Triethylamine             | 1   | 101.19 | 0.726 | 1.100 | NMP  | 1.9   | 2.39  | 50.34 | 0.794979079 |
| 132 | C12 | 1a | 15 | isobutyl methanesulfonate | 1 | NaH (60%)                 | 0.6 | 24     | 1     | 1.100 | NMP  | 11.59 | 14.64 | 12.86 | 0.791666667 |
| 133 | D1  | 1a | 15 | isobutyl methanesulfonate | 1 | Na2CO3                    | 1   | 105.99 | 1.000 | 1.100 | PhMe | 9.4   | 14.57 | 31.86 | 0.64516129  |
| 134 | D2  | 1a | 15 | isobutyl methanesulfonate | 1 | K2CO3                     | 1   | 138.21 | 1.000 | 1.100 | PhMe | 5.47  | 8.85  | 25.76 | 0.618079096 |
| 135 | D3  | 1a | 15 | isobutyl methanesulfonate | 1 | Cs2CO3                    | 1   | 325.82 | 1     | 1.100 | PhMe | 1.64  | 1.9   | 61.95 | 0.863157895 |
| 136 | D4  | 1a | 15 | isobutyl methanesulfonate | 1 | K3PO4                     | 1   | 212.27 | 1     | 1.100 | PhMe | 2.51  | 3.99  | 43.5  | 0.629072682 |
| 137 | D5  | 1a | 15 | isobutyl methanesulfonate | 1 | KOtBu                     | 1   | 112.22 | 1.000 | 1.100 | PhMe | 3.87  | 3.57  | 41.51 | 1.084033613 |
| 138 | D6  | 1a | 15 | isobutyl methanesulfonate | 1 | KOSiMe3                   | 1   | 128.29 | 1     | 1.100 | PhMe | 3.17  | 2.45  | 24.47 | 1.293877551 |
| 139 | D7  | 1a | 15 | isobutyl methanesulfonate | 1 | DMAP                      | 1   | 122.17 | 1     | 1.100 | PhMe | 3.7   | 2.63  | 18.72 | 1.406844106 |
| 140 | D8  | 1a | 15 | isobutyl methanesulfonate | 1 | TBD                       | 1   | 139.2  | 1     | 1.100 | PhMe | 4.73  | 3.62  | 23.09 | 1.306629834 |
| 141 | D9  | 1a | 15 | isobutyl methanesulfonate | 1 | Pyridine                  | 1   | 79.1   | 0.973 | 1.100 | PhMe | 3.8   | 2.25  | 19.39 | 1.688888889 |
| 142 | D10 | 1a | 15 | isobutyl methanesulfonate | 1 | 2,6-Di-tert-butylpyridine | 1   | 191.31 | 0.852 | 1.100 | PhMe | 0.45  | 0.58  | 84.44 | 0.775862069 |
| 143 | D11 | 1a | 15 | isobutyl methanesulfonate | 1 | Triethylamine             | 1   | 101.19 | 0.726 | 1.100 | PhMe | 2.23  | 1.36  | 41.83 | 1.639705882 |
| 144 | D12 | 1a | 15 | isobutyl methanesulfonate | 1 | NaH (60%)                 | 0.6 | 24     | 1     | 1.100 | PhMe | 2.16  | 1.06  | 44.37 | 2.037735849 |

|     |     |    |    |                                   |   |                           |     |        |       |       |      |      |      |       |             |
|-----|-----|----|----|-----------------------------------|---|---------------------------|-----|--------|-------|-------|------|------|------|-------|-------------|
| 145 | E1  | 1a | 15 | isobutyl 4-methylbenzenesulfonate | 1 | Na2CO3                    | 1   | 105.99 | 1.000 | 1.100 | MeCN | 2.26 | 1.34 | 51.07 | 1.686567164 |
| 146 | E2  | 1a | 15 | isobutyl 4-methylbenzenesulfonate | 1 | K2CO3                     | 1   | 138.21 | 1.000 | 1.100 | MeCN |      |      |       | Hydrolysis  |
| 147 | E3  | 1a | 15 | isobutyl 4-methylbenzenesulfonate | 1 | Cs2CO3                    | 1   | 325.82 | 1     | 1.100 | MeCN |      |      |       | Hydrolysis  |
| 148 | E4  | 1a | 15 | isobutyl 4-methylbenzenesulfonate | 1 | K3PO4                     | 1   | 212.27 | 1     | 1.100 | MeCN |      |      |       | Hydrolysis  |
| 149 | E5  | 1a | 15 | isobutyl 4-methylbenzenesulfonate | 1 | KOtBu                     | 1   | 112.22 | 1.000 | 1.100 | MeCN |      |      |       | Hydrolysis  |
| 150 | E6  | 1a | 15 | isobutyl 4-methylbenzenesulfonate | 1 | KOSiMe3                   | 1   | 128.29 | 1     | 1.100 | MeCN |      |      |       | Hydrolysis  |
| 151 | E7  | 1a | 15 | isobutyl 4-methylbenzenesulfonate | 1 | DMAP                      | 1   | 122.17 | 1     | 1.100 | MeCN |      |      |       | Hydrolysis  |
| 152 | E8  | 1a | 15 | isobutyl 4-methylbenzenesulfonate | 1 | TBD                       | 1   | 139.2  | 1     | 1.100 | MeCN |      |      |       | Hydrolysis  |
| 153 | E9  | 1a | 15 | isobutyl 4-methylbenzenesulfonate | 1 | Pyridine                  | 1   | 79.1   | 0.973 | 1.100 | MeCN |      |      |       | Hydrolysis  |
| 154 | E10 | 1a | 15 | isobutyl 4-methylbenzenesulfonate | 1 | 2,6-Di-tert-butylpyridine | 1   | 191.31 | 0.852 | 1.100 | MeCN |      |      |       | Hydrolysis  |
| 155 | E11 | 1a | 15 | isobutyl 4-methylbenzenesulfonate | 1 | Triethylamine             | 1   | 101.19 | 0.726 | 1.100 | MeCN |      |      |       | no reaction |
| 156 | E12 | 1a | 15 | isobutyl 4-methylbenzenesulfonate | 1 | NaH (60%)                 | 0.6 | 24     | 1     | 1.100 | MeCN |      |      |       | Hydrolysis  |
| 157 | F1  | 1a | 15 | isobutyl 4-methylbenzenesulfonate | 1 | Na2CO3                    | 1   | 105.99 | 1.000 | 1.100 | THF  |      |      |       | Hydrolysis  |
| 158 | F2  | 1a | 15 | isobutyl 4-methylbenzenesulfonate | 1 | K2CO3                     | 1   | 138.21 | 1.000 | 1.100 | THF  |      |      |       | no reaction |
| 159 | F3  | 1a | 15 | isobutyl 4-methylbenzenesulfonate | 1 | Cs2CO3                    | 1   | 325.82 | 1     | 1.100 | THF  |      |      |       | Hydrolysis  |
| 160 | F4  | 1a | 15 | isobutyl 4-methylbenzenesulfonate | 1 | K3PO4                     | 1   | 212.27 | 1     | 1.100 | THF  |      |      |       | no reaction |
| 161 | F5  | 1a | 15 | isobutyl 4-methylbenzenesulfonate | 1 | KOtBu                     | 1   | 112.22 | 1.000 | 1.100 | THF  |      |      |       | Hydrolysis  |
| 162 | F6  | 1a | 15 | isobutyl 4-methylbenzenesulfonate | 1 | KOSiMe3                   | 1   | 128.29 | 1     | 1.100 | THF  |      |      |       | Hydrolysis  |
| 163 | F7  | 1a | 15 | isobutyl 4-methylbenzenesulfonate | 1 | DMAP                      | 1   | 122.17 | 1     | 1.100 | THF  |      |      |       | no reaction |
| 164 | F8  | 1a | 15 | isobutyl 4-methylbenzenesulfonate | 1 | TBD                       | 1   | 139.2  | 1     | 1.100 | THF  |      |      |       | no reaction |
| 165 | F9  | 1a | 15 | isobutyl 4-methylbenzenesulfonate | 1 | Pyridine                  | 1   | 79.1   | 0.973 | 1.100 | THF  |      |      |       | no reaction |
| 166 | F10 | 1a | 15 | isobutyl 4-methylbenzenesulfonate | 1 | 2,6-Di-tert-butylpyridine | 1   | 191.31 | 0.852 | 1.100 | THF  |      |      |       | no reaction |
| 167 | F11 | 1a | 15 | isobutyl 4-methylbenzenesulfonate | 1 | Triethylamine             | 1   | 101.19 | 0.726 | 1.100 | THF  |      |      |       | no reaction |
| 168 | F12 | 1a | 15 | isobutyl 4-methylbenzenesulfonate | 1 | NaH (60%)                 | 0.6 | 24     | 1     | 1.100 | THF  |      |      |       | Hydrolysis  |
| 169 | G1  | 1a | 15 | isobutyl 4-methylbenzenesulfonate | 1 | Na2CO3                    | 1   | 105.99 | 1.000 | 1.100 | NMP  |      |      |       | no reaction |
| 170 | G2  | 1a | 15 | isobutyl 4-methylbenzenesulfonate | 1 | K2CO3                     | 1   | 138.21 | 1.000 | 1.100 | NMP  |      |      |       | no reaction |
| 171 | G3  | 1a | 15 | isobutyl 4-methylbenzenesulfonate | 1 | Cs2CO3                    | 1   | 325.82 | 1     | 1.100 | NMP  |      |      |       | Hydrolysis  |
| 172 | G4  | 1a | 15 | isobutyl 4-methylbenzenesulfonate | 1 | K3PO4                     | 1   | 212.27 | 1     | 1.100 | NMP  |      |      |       | Hydrolysis  |
| 173 | G5  | 1a | 15 | isobutyl 4-methylbenzenesulfonate | 1 | KOtBu                     | 1   | 112.22 | 1.000 | 1.100 | NMP  |      |      |       | Hydrolysis  |

|     |     |    |    |                                   |   |                           |     |        |       |       |      |             |
|-----|-----|----|----|-----------------------------------|---|---------------------------|-----|--------|-------|-------|------|-------------|
| 174 | G6  | 1a | 15 | isobutyl 4-methylbenzenesulfonate | 1 | KOSiMe3                   | 1   | 128.29 | 1     | 1.100 | NMP  | Hydrolysis  |
| 175 | G7  | 1a | 15 | isobutyl 4-methylbenzenesulfonate | 1 | DMAP                      | 1   | 122.17 | 1     | 1.100 | NMP  | Hydrolysis  |
| 176 | G8  | 1a | 15 | isobutyl 4-methylbenzenesulfonate | 1 | TBD                       | 1   | 139.2  | 1     | 1.100 | NMP  | Hydrolysis  |
| 177 | G9  | 1a | 15 | isobutyl 4-methylbenzenesulfonate | 1 | Pyridine                  | 1   | 79.1   | 0.973 | 1.100 | NMP  | Hydrolysis  |
| 178 | G10 | 1a | 15 | isobutyl 4-methylbenzenesulfonate | 1 | 2,6-Di-tert-butylpyridine | 1   | 191.31 | 0.852 | 1.100 | NMP  | no reaction |
| 179 | G11 | 1a | 15 | isobutyl 4-methylbenzenesulfonate | 1 | Triethylamine             | 1   | 101.19 | 0.726 | 1.100 | NMP  | no reaction |
| 180 | G12 | 1a | 15 | isobutyl 4-methylbenzenesulfonate | 1 | NaH (60%)                 | 0.6 | 24     | 1     | 1.100 | NMP  | Hydrolysis  |
| 181 | H1  | 1a | 15 | isobutyl 4-methylbenzenesulfonate | 1 | Na2CO3                    | 1   | 105.99 | 1.000 | 1.100 | PhMe | no reaction |
| 182 | H2  | 1a | 15 | isobutyl 4-methylbenzenesulfonate | 1 | K2CO3                     | 1   | 138.21 | 1.000 | 1.100 | PhMe | no reaction |
| 183 | H3  | 1a | 15 | isobutyl 4-methylbenzenesulfonate | 1 | Cs2CO3                    | 1   | 325.82 | 1     | 1.100 | PhMe | no reaction |
| 184 | H4  | 1a | 15 | isobutyl 4-methylbenzenesulfonate | 1 | K3PO4                     | 1   | 212.27 | 1     | 1.100 | PhMe | no reaction |
| 185 | H5  | 1a | 15 | isobutyl 4-methylbenzenesulfonate | 1 | KOtBu                     | 1   | 112.22 | 1.000 | 1.100 | PhMe | no reaction |
| 186 | H6  | 1a | 15 | isobutyl 4-methylbenzenesulfonate | 1 | KOSiMe3                   | 1   | 128.29 | 1     | 1.100 | PhMe | no reaction |
| 187 | H7  | 1a | 15 | isobutyl 4-methylbenzenesulfonate | 1 | DMAP                      | 1   | 122.17 | 1     | 1.100 | PhMe | no reaction |
| 188 | H8  | 1a | 15 | isobutyl 4-methylbenzenesulfonate | 1 | TBD                       | 1   | 139.2  | 1     | 1.100 | PhMe | Hydrolysis  |
| 189 | H9  | 1a | 15 | isobutyl 4-methylbenzenesulfonate | 1 | Pyridine                  | 1   | 79.1   | 0.973 | 1.100 | PhMe | Hydrolysis  |
| 190 | H10 | 1a | 15 | isobutyl 4-methylbenzenesulfonate | 1 | 2,6-Di-tert-butylpyridine | 1   | 191.31 | 0.852 | 1.100 | PhMe | no reaction |
| 191 | H11 | 1a | 15 | isobutyl 4-methylbenzenesulfonate | 1 | Triethylamine             | 1   | 101.19 | 0.726 | 1.100 | PhMe | Hydrolysis  |
| 192 | H12 | 1a | 15 | isobutyl 4-methylbenzenesulfonate | 1 | NaH (60%)                 | 0.6 | 24     | 1     | 1.100 | PhMe | no reaction |



## Reaction Optimization

### Enamine Formation

Isobutyraldehyde was added to methyl 5-bromo-1*H*-indazole-6-carboxylate **1a** (1.0 equiv), acid, and solvent in a reactor vessel equipped with a Dean-Stark condenser. The reaction mixture was heated to a vigorous reflux (jacket temperature = 140 °C) for 3 hours. A sample for LCMS analysis was prepared at the indicated time. Conversion and **4a:5a** ratio determined by LCMS at 225 nm.

### Acid and acid equiv

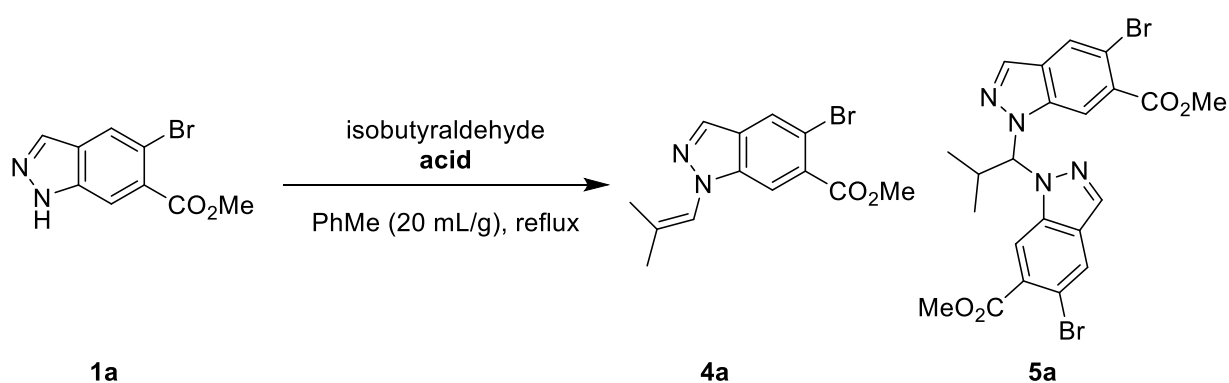

| entry    | acid                                           | isobutyraldehyde (equiv) | conversion (ratio <b>4a:5a</b> ) |
|----------|------------------------------------------------|--------------------------|----------------------------------|
| 1        | none                                           | 2.0                      | 0%                               |
| 2        | MsOH (0.25 equiv)                              | 2.0                      | 99% (98:2)                       |
| 3        | <i>p</i> TSA·H <sub>2</sub> O (0.25 equiv)     | 2.0                      | 96% (95:5)                       |
| <b>4</b> | <b><i>p</i>TSA·H<sub>2</sub>O (0.25 equiv)</b> | <b>3.0</b>               | <b>99% (98:2)</b>                |
| 5        | <i>p</i> TSA·H <sub>2</sub> O (1.0 equiv)      | 2.0                      | 70% (90:10)                      |
| 6        | <i>p</i> TSA·H <sub>2</sub> O (0.085 equiv)    | 3.0                      | >99% (97:3)                      |

## Dehydration method

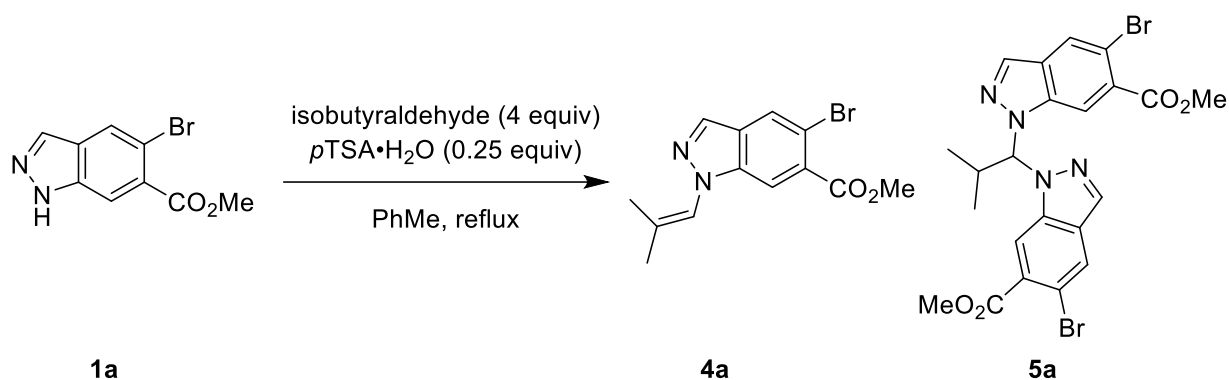

| entry    | apparatus                   | conversion (ratio <b>4a:5a</b> ) |
|----------|-----------------------------|----------------------------------|
| <b>1</b> | <b>Dean-Stark condenser</b> | <b>&gt;99% (99:1)</b>            |
| 2        | reflux condenser            | 95% (82:18)                      |
| 3        | 4 Å MS (24 h)               | 97% (52:48)                      |

Reaction mixtures sampled at reflux.

## Solvent and concentration

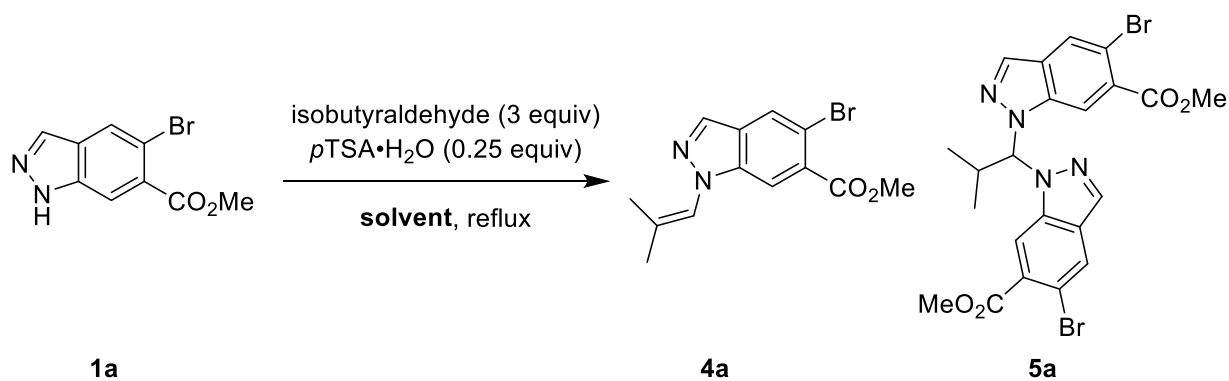

| entry    | solvent               | isobutyraldehyde (equiv) | time       | conversion (ratio <b>4a:5a</b> ) |
|----------|-----------------------|--------------------------|------------|----------------------------------|
| 1        | PhMe (10 mL/g)        | 3.0                      | 5 h 30 min | 93% (83:17)                      |
| <b>2</b> | <b>PhMe (15 mL/g)</b> | <b>3.0</b>               | <b>3 h</b> | <b>&gt;99% (99:1)</b>            |
| 3        | PhMe (20 mL/g)        | 3.0                      | 4 h        | 95% (89:11)                      |
| 4        | PhMe (15 mL/g)        | 2.0                      | 4 h        | 98% (82:8)                       |
| 5        | CyH (15 mL/g)         | 2.0                      | 4 h        | 86% (8:92)                       |

## Aldehyde equiv

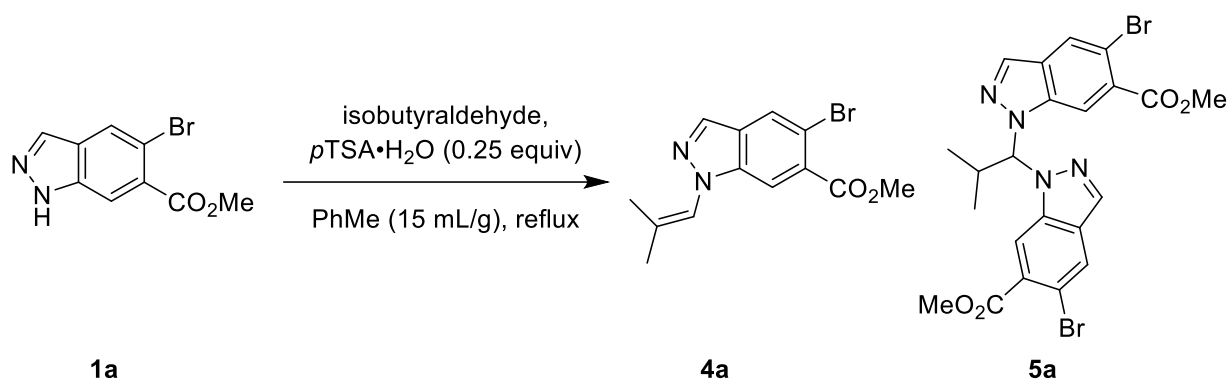

| entry | isobutyraldehyde (equiv) | conversion (ratio <b>4a:5a</b> ) |
|-------|--------------------------|----------------------------------|
| 1     | 2                        | 95% (90:10)                      |
| 2     | 3                        | >99% ( <b>98:2</b> )             |
| 3     | 4                        | >99% (99:1)                      |

## Quench

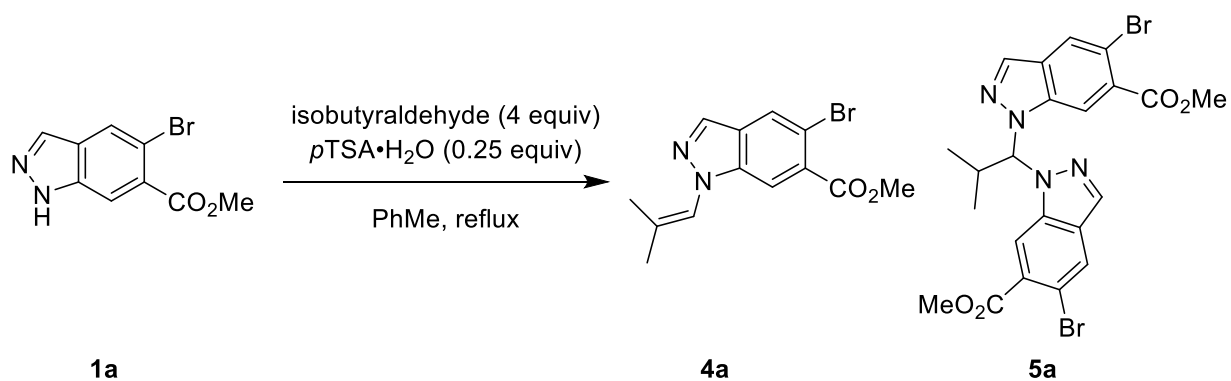

| entry | quench                                   | sampling temperature (°C) | conversion (ratio <b>4a:5a</b> ) |
|-------|------------------------------------------|---------------------------|----------------------------------|
| 1     | pre-quench                               | 110                       | >99% (100:0)                     |
| 2     | Et <sub>3</sub> N (0.25 equiv) at reflux | 20                        | >99% (100:0)                     |
| 3     | none                                     | 20                        | 97% (96:4)                       |

## Enamine Hydrogenation

Isobutyraldehyde (3.0 equiv) was added to methyl 5-bromo-1*H*-indazole-6-carboxylate **1a** (1.0 equiv), *p*TSA·H<sub>2</sub>O (0.25 equiv), and PhMe (15 mL/g) in a reactor vessel equipped with a Dean-Stark condenser. The reaction mixture was heated to a vigorous reflux (jacket temperature = 140 °C) for 3 h. Et<sub>3</sub>N (0.25 equiv) was added, then the reaction mixture was cooled to rt. The reaction mixture was washed with H<sub>2</sub>O, 1 M HCl, sat. brine, dried over MgSO<sub>4</sub>, filtered, and concentrated to afford crude enamine product. The crude enamine product was dissolved in PhMe.

Hydrogenation catalysts were screened in Argonaut Endeavor catalyst screening systems. The catalyst was added to crude enamine solution (3 mL), and the reaction mixture was stirred under an atmosphere of H<sub>2</sub> at 40 psi for 22 h.

Hydrogenation temperature optimisation reactions were conducted in Type 3 Buchiglasuster reactors. 5% Pt/C (0.013 equiv) was added to crude enamine solution, and the reaction mixture was stirred under an atmosphere of H<sub>2</sub> at 40 psi until completion.

## Catalyst

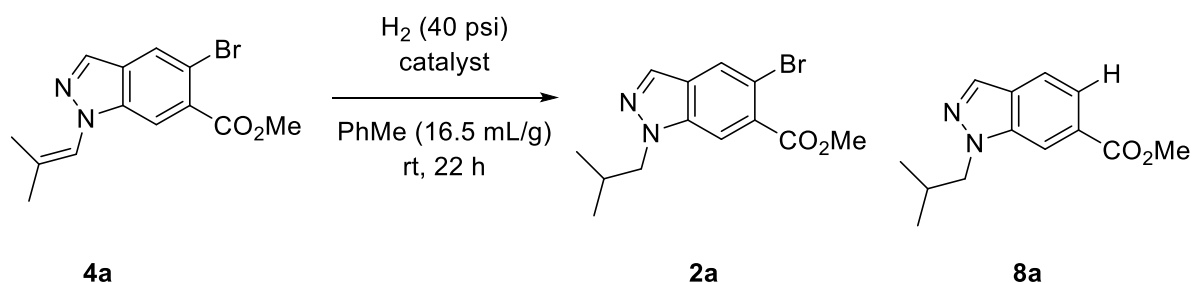

| entry | catalyst                                     | conversion (ratio <b>2a</b> : <b>8a</b> ) |
|-------|----------------------------------------------|-------------------------------------------|
| 1     | <b>Pt/C (JM B103032-5, 5%) (0.013 equiv)</b> | <b>100 (97:3)</b>                         |
| 2     | Pt/C (JM B103032-5, 5%) (0.009 equiv)        | 89 (100:0)                                |
| 3     | Pd/C (JM 5R39, 5%) (0.013 equiv)             | 100 (69:31)                               |
| 4     | Rh/C (JM 5R594, 5%) (0.013 equiv)            | 100 (99:1)                                |

## Temperature and time

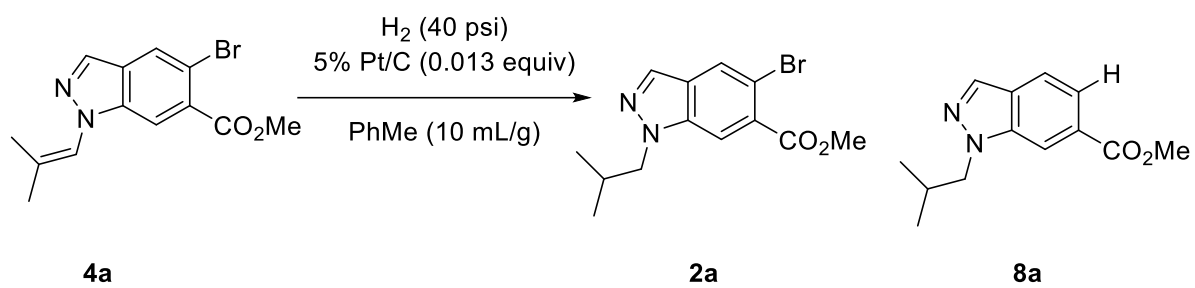

| entry    | temp (°C) | time (h)  | conversion (ratio <b>2a:8a</b> ) |
|----------|-----------|-----------|----------------------------------|
| 1        | rt        | 14        | 99 (99:1)                        |
| <b>2</b> | <b>30</b> | <b>10</b> | <b>100 (99:1)</b>                |
| 3        | 40        | 10        | 100 (99:1)                       |

## Reaction Scope

### General Procedure

Aldehyde/ketone (3.0 equiv) was added to substrate (2.0 g, 1.0 equiv), *p*TSA·H<sub>2</sub>O (0.25 equiv), and PhMe (30 mL) in a 50 mL EasyMax reactor vessel. A Dean-Stark condenser was equipped and the reaction mixture was heated to a vigorous reflux (jacket temperature = 140 °C) for 3 h. Et<sub>3</sub>N (0.27 mL, 1.96 mmol, 0.25 equiv) was added, then the reaction mixture was cooled to rt. The reaction mixture was washed with H<sub>2</sub>O (8 mL), 1 M HCl (8 mL), sat. brine (8 mL), dried over MgSO<sub>4</sub>, filtered, and concentrated to afford crude enamine product.

The crude enamine product was dissolved in toluene (20 mL). 5% Pt/C was added, and the reaction mixture was stirred under an atmosphere of H<sub>2</sub> at 40 psi and 30 °C for 24 hours (or until completion). The resulting reaction mixture was filtered through arbocel, washed with PhMe, and concentrated to afford crude hydrogenated product. The crude hydrogenated product was purified by flash silica chromatography to afford the title compound.

**NB:** Reaction selectivity determined by <sup>1</sup>H NMR and LCMS of crude enamine product. *N*2 isomer not detected unless otherwise stated.

## Product Characterisation

### Methyl 5-bromo-1-isobutyl-1*H*-indazole-6-carboxylate (2a)

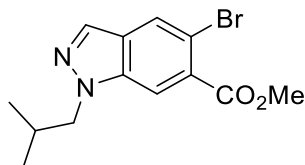

Prepared according to the general procedure from methyl 5-bromo-1*H*-indazole-6-carboxylate (2.00 g, 7.84 mmol, 1.0 equiv) and isobutyraldehyde. Hydrogenation followed the general procedure, with 5% Pt/C (0.013 equiv). The crude hydrogenated product was purified by flash silica chromatography (elution gradient 0 to 20% EtOAc in heptane) to afford the title compound as a pale-yellow solid (1.85 g, 5.94 mmol, 76% yield (over 2 steps)).

**mp** 56-58 °C;  **$\nu_{\text{max}}$**  (neat) /cm<sup>-1</sup> 2957, 1729, 1470, 1244; **<sup>1</sup>H NMR** (400 MHz, CDCl<sub>3</sub>)  $\delta$  8.02 (s, 1H), 7.97 (s, 1H), 7.85 (s, 1H), 4.19 (d,  $J$  = 7.5 Hz, 2H), 3.99 (s, 3H), 2.42 – 2.25 (m, 1H), 0.93 (d,  $J$  = 6.5 Hz, 6H); **<sup>13</sup>C NMR** (101 MHz, CDCl<sub>3</sub>)  $\delta$  167.3, 138.1, 131.6, 129.9, 126.5, 126.4, 112.6, 111.5, 56.8, 52.4, 30.2, 20.8; **HRMS** (ESI<sup>+</sup>) calc. for C<sub>13</sub>H<sub>16</sub><sup>79</sup>BrN<sub>2</sub>O<sub>2</sub> ([M+H]<sup>+</sup>) 311.0390; found 311.0392.

**NB:** Spectra consistent with previous route above.

### 1-isobutyl-1*H*-indazole (2b)

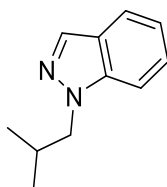

Prepared according to the general procedure from 1*H*-indazole (2.00 g, 16.93 mmol, 1.0 equiv) and isobutyraldehyde. Hydrogenation followed the general procedure, with 5% Pt/C (0.013 equiv). The crude hydrogenated product was purified by flash silica chromatography (elution gradient 0 to 20% EtOAc in heptane) to afford the title compound as a pale-yellow oil (2.26 g, 12.97 mmol, 77% yield (over 2 steps)).

**$\nu_{\text{max}}$**  (neat) /cm<sup>-1</sup> 2959, 1616, 1465, 1294; **<sup>1</sup>H NMR** (400 MHz, DMSO-*d*<sub>6</sub>)  $\delta$  8.05 (d,  $J$  = 1.0 Hz, 1H), 7.75 (dt,  $J$  = 8.0, 1.0 Hz, 1H), 7.66 (dq,  $J$  = 8.5, 1.0 Hz, 1H), 7.36 (ddd,  $J$  = 8.5, 7.0, 1.0 Hz, 1H), 7.12 (ddd,  $J$  = 8.0, 7.0, 1.0 Hz, 1H), 4.21 (d,  $J$  = 7.0 Hz, 2H), 2.21 (nonet,  $J$  = 7.0 Hz, 1H), 0.85 (d,  $J$  = 7.0 Hz, 6H); **<sup>13</sup>C NMR** (101 MHz, DMSO-*d*<sub>6</sub>)  $\delta$  139.6, 132.3, 125.8, 123.2, 120.7,

120.1, 109.7, 55.1, 29.1, 19.8; **HRMS** (ESI<sup>+</sup>) calc. for C<sub>11</sub>H<sub>15</sub>N<sub>2</sub> ([M+H]<sup>+</sup>) 175.1230; found 175.1233.

#### Methyl 1-isobutyl-1*H*-indazole-3-carboxylate (2c)

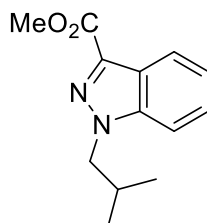

Prepared according to the general procedure from methyl 1*H*-indazole-3-carboxylate (2.00 g, 11.35 mmol, 1.0 equiv) and isobutyraldehyde. Hydrogenation followed the general procedure, with 5% Pt/C (0.013 equiv). The crude hydrogenated product was purified by flash silica chromatography (elution gradient 0 to 20% EtOAc in heptane) to afford the title compound as a pale-yellow oil (1.70 g, 7.32 mmol, 64% yield (over 2 steps)).

**v**<sub>max</sub> (neat) /cm<sup>-1</sup> 2959, 1709, 1478, 1270, 1236; **<sup>1</sup>H NMR** (400 MHz, DMSO-*d*<sub>6</sub>) δ 8.08 (dt, *J* = 8.0, 1.0 Hz, 1H), 7.85 (dt, *J* = 8.5, 1.0 Hz, 1H), 7.49 (ddd, *J* = 8.5, 7.0, 1.0 Hz, 1H), 7.34 (ddd, *J* = 8.0, 7.0, 1.0 Hz, 1H), 4.34 (d, *J* = 7.5 Hz, 2H), 3.92 (s, 3H), 2.34 – 2.19 (m, 1H), 0.87 (d, *J* = 6.5 Hz, 7H); **<sup>13</sup>C NMR** (101 MHz, DMSO-*d*<sub>6</sub>) δ 162.4, 140.8, 133.6, 126.6, 123.1, 122.7, 121.1, 110.9, 55.9, 51.6, 29.1, 19.7; **HRMS** (ESI<sup>+</sup>) calc. for C<sub>13</sub>H<sub>17</sub>N<sub>2</sub>O<sub>2</sub> [M+H]<sup>+</sup> 233.1285, found 233.1277.

#### Methyl 1-isobutyl-1*H*-indazole-4-carboxylate (2d)

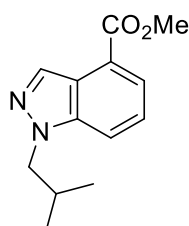

Prepared according to the general procedure from methyl 1*H*-indazole-4-carboxylate (2.00 g, 11.35 mmol, 1.0 equiv) and isobutyraldehyde. Hydrogenation followed the general procedure, with 5% Pt/C (0.013 equiv). The crude hydrogenated product was purified by flash silica chromatography (elution gradient 0 to 20% EtOAc in heptane) to afford the title compound as a pale-yellow oil (1.91 g, 8.22 mmol, 72% yield (over 2 steps)).

**v**<sub>max</sub> (neat) /cm<sup>-1</sup> 2958, 1713, 1449, 1271, 1229; **<sup>1</sup>H NMR** (400 MHz, DMSO-*d*<sub>6</sub>) δ 8.39 (s, 1H), 8.03 (d, *J* = 9.0 Hz, 1H), 7.83 (d, *J* = 8.0 Hz, 1H), 7.51 (t, *J* = 8.0 Hz, 1H), 4.29 (d, *J* = 7.0 Hz, 2H),

3.94 (s, 3H), 2.28 – 2.18 (m, 1H), 0.84 (d,  $J$  = 7.0 Hz, 6H);  $^{13}\text{C}$  NMR (101 MHz, DMSO- $d_6$ )  $\delta$  166.0, 140.1, 132.7, 125.4, 123.6, 121.9, 121.3, 115.3, 55.3, 52.1, 29.2, 19.7; HRMS (ESI $^+$ ) calc. for  $\text{C}_{13}\text{H}_{17}\text{N}_2\text{O}_2$   $[\text{M}+\text{H}]^+$  233.1285, found 233.1286.

#### Methyl 1-isobutyl-1*H*-indazole-5-carboxylate (2e)

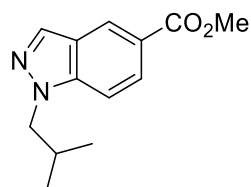

Prepared according to the general procedure from methyl 1*H*-indazole-5-carboxylate (2.00 g, 11.35 mmol, 1.0 equiv) and isobutyraldehyde. Hydrogenation followed the general procedure, with 5% Pt/C (0.013 equiv). The crude hydrogenated product was purified by flash silica chromatography (elution gradient 0 to 20% EtOAc in heptane) to afford the title compound as a pale-yellow oil (2.26 g, 9.73 mmol, 86% yield (over 2 steps)).

$\nu_{\text{max}}$  (neat) / $\text{cm}^{-1}$  2959, 1712, 1434, 1247;  $^1\text{H}$  NMR (400 MHz, DMSO- $d_6$ )  $\delta$  8.47 (s, 1H), 8.25 (s, 1H), 7.94 (dd,  $J$  = 9.0, 1.5 Hz, 1H), 7.78 (d,  $J$  = 9.0 Hz, 1H), 4.25 (d,  $J$  = 7.5 Hz, 2H), 3.87 (s, 3H), 2.28 – 2.17 (m, 1H), 0.85 (d,  $J$  = 6.5 Hz, 6H);  $^{13}\text{C}$  NMR (101 MHz, DMSO- $d_6$ )  $\delta$  167.0, 141.8, 135.1, 126.6, 124.6, 123.5, 122.4, 110.4, 55.8, 52.5, 29.6, 20.2; HRMS (ESI $^+$ ) calc. for  $\text{C}_{13}\text{H}_{17}\text{N}_2\text{O}_2$   $[\text{M}+\text{H}]^+$  233.1285, found 233.1286.

#### Methyl 1-isobutyl-1*H*-indazole-6-carboxylate (2f)

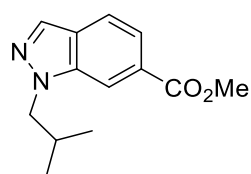

Prepared according to the general procedure from methyl 1*H*-indazole-6-carboxylate (2.00 g, 11.35 mmol, 1.0 equiv) and isobutyraldehyde. Hydrogenation followed the general procedure, with 5% Pt/C (0.013 equiv). The crude hydrogenated product was purified by flash silica chromatography (elution gradient 0 to 20% EtOAc in heptane) to afford the title compound as a pale-yellow solid (1.84 g, 7.92 mmol, 70% yield (over 2 steps)).

mp 54–56 °C;  $\nu_{\text{max}}$  (neat) / $\text{cm}^{-1}$  2954, 1714, 1432, 1275, 1234;  $^1\text{H}$  NMR (400 MHz, DMSO- $d_6$ )  $\delta$  8.33 – 8.32 (m, 1H), 8.19 (d,  $J$  = 1.0 Hz, 1H), 7.88 (dd,  $J$  = 8.5 Hz, 1H), 7.69 (dd,  $J$  = 8.5, 1.5 Hz, 1H), 4.32 (d,  $J$  = 7.5, 2H), 3.91 (s, 3H), 2.30 – 2.17 (m, 1H), 0.85 (d,  $J$  = 6.5, 6H);  $^{13}\text{C}$  NMR (101

MHz, DMSO-*d*<sub>6</sub>)  $\delta$  166.6, 139.0, 132.7, 127.2, 125.8, 121.1, 120.2, 111.8, 55.3, 52.2, 29.2, 19.7; **HRMS** (ESI<sup>+</sup>) calc. for C<sub>13</sub>H<sub>17</sub>N<sub>2</sub>O<sub>2</sub> [M+H]<sup>+</sup> 233.1285, found 233.1286.

### 7-bromo-1-isobutyl-1*H*-indazole (2h)

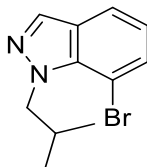

Isobutyraldehyde (2.78 mL, 30.45 mmol, 3.0 equiv) was added to 7-bromo-1*H*-indazole (2.0 g, 10.15 mmol, 1.0 equiv), *p*TSA·H<sub>2</sub>O (0.48 g, 2.54 mmol, 0.25 equiv), and PhMe (30 mL) in a 50 mL EasyMax reactor vessel. A Dean-Stark condenser was equipped and the reaction mixture was heated to a vigorous reflux (jacket temperature = 140 °C) for 6 h. Et<sub>3</sub>N (0.35 mL, 2.54 mmol, 0.25 equiv) was added, then the reaction mixture was cooled to rt. The reaction mixture was washed with H<sub>2</sub>O (8 mL), 1 M HCl (8 mL), sat. brine (8 mL), dried over MgSO<sub>4</sub>, filtered, and concentrated to afford crude product. The crude product was purified by flash silica chromatography (elution gradient 0 to 20% EtOAc in heptane) to afford 7-bromo-1-(2-methylprop-1-en-1-yl)-1*H*-indazole (1.00 g, 3.96 mmol, 39% yield) and 7-bromo-1*H*-indazole starting material (0.8 g, 4.1 mmol, 40% yield (or 65% yield brsm)).

7-bromo-1-(2-methylprop-1-en-1-yl)-1*H*-indazole was dissolved in toluene (20 mL). 5% Pt/C (0.013 equiv) was added, and the reaction mixture was stirred under an atmosphere of H<sub>2</sub> at 40 psi and 30 °C for 24 hours. The resulting reaction mixture was filtered through arboce, washed with PhMe, and concentrated to afford crude hydrogenated product. The crude hydrogenated product was purified by flash silica chromatography (elution gradient 0 to 20% EtOAc in heptane) to afford the title compound as a pale-yellow oil (0.70 g, 2.77 mmol, 27% yield (over 2 steps) (or 45% yield brsm (over 2 steps))).

$\nu_{\text{max}}$  (neat) /cm<sup>-1</sup> 2957, 1607, 1447, 1291; **<sup>1</sup>H NMR** (400 MHz, DMSO-*d*<sub>6</sub>)  $\delta$  8.16 (s, 1H), 7.80 (d, *J* = 8.0 Hz, 1H), 7.62 (d, *J* = 8.0 Hz, 1H), 7.04 (t, *J* = 8.0 Hz, 1H), 4.53 (d, *J* = 7.5 Hz, 2H), 2.25-2.15 (m, 1H), 0.84 (d, *J* = 7.0 Hz, 6H); **<sup>13</sup>C NMR** (101 MHz, DMSO-*d*<sub>6</sub>)  $\delta$  136.1, 133.0, 131.0, 126.5, 121.7, 120.9, 102.0, 56.7, 30.5, 19.4; **HRMS** (ESI<sup>+</sup>) calc. for C<sub>11</sub>H<sub>14</sub><sup>79</sup>BrN<sub>2</sub> [M+H]<sup>+</sup> 253.0335, found 253.0334

### 4-fluoro-1-isobutyl-1*H*-indazole (2i)

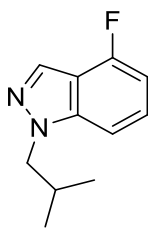

Prepared according to the general procedure from 4-fluoro-1*H*-indazole (2.00 g, 14.69 mmol, 1.0 equiv) and isobutyraldehyde. Hydrogenation followed the general procedure, with 5% Pt/C (0.013 equiv). The crude hydrogenated product was purified by flash silica chromatography (elution gradient 0 to 10% EtOAc in heptane) to afford the title compound as a pale-yellow oil (2.23 g, 11.58 mmol, 79% yield (over 2 steps)).

$\nu_{\text{max}}$  (neat) /cm<sup>-1</sup> 2962, 1633, 1458, 1284; <sup>1</sup>H NMR (400 MHz, DMSO-*d*<sub>6</sub>)  $\delta$  8.17 (d, *J* = 1.0 Hz, 1H), 7.53 (d, *J* = 8.5 Hz, 1H), 7.36 (ddd, *J* = 8.5, 7.5, 5.0 Hz, 1H), 6.89 (dd, *J* = 10.5, 7.5 Hz, 1H), 4.24 (d, *J* = 7.0 Hz, 2H), 2.27-2.17 (m, 1H), 0.85 (d, *J* = 6.5 Hz, 6H); <sup>19</sup>F NMR (376 MHz, DMSO)  $\delta$  -118.97 (dd, *J* = 10.5, 5.0); <sup>13</sup>C NMR (100 MHz, DMSO)  $\delta$  155.3 (d, *J* = 247 Hz), 142.9 (d, *J* = 10 Hz), 129.1 (d, *J* = 2 Hz), 127.5 (d, *J* = 8 Hz), 113.7 (d, *J* = 23 Hz), 107.0 (d, *J* = 4 Hz), 105.0 (d, *J* = 18 Hz), 56.0, 29.6, 20.2. <sup>13</sup>C NMR (101 MHz, DMSO)  $\delta$  155.3 (d, *J* = 249.0 Hz), 142.9 (d, *J* = 9.5 Hz), 129.1 (d, *J* = 2.0 Hz), 127.5 (d, *J* = 7.5 Hz), 113.7 (d, *J* = 23.5 Hz), 107.0 (d, *J* = 4.0 Hz), 104.9 (d, *J* = 18.0 Hz), 56.0, 29.6, 20.2; HRMS (ESI<sup>+</sup>) calc. for C<sub>11</sub>H<sub>14</sub>FN<sub>2</sub> [M+H]<sup>+</sup> 193.1136, found 193.1143.

#### Methyl 5-fluoro-1-isobutyl-1*H*-indazole-6-carboxylate (2j)

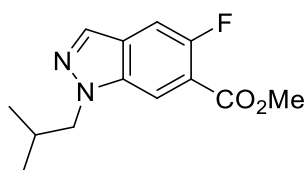

Prepared according to the general procedure from methyl 5-fluoro-1*H*-indazole-6-carboxylate (2.00 g, 10.30 mmol, 1.0 equiv) and isobutyraldehyde. Hydrogenation followed the general procedure, with 5% Pt/C (0.013 equiv). The crude hydrogenated product was purified by flash silica chromatography (elution gradient 0 to 20% EtOAc in heptane) to afford the title compound as an off-white solid (2.12 g, 8.47 mmol, 82% yield (over 2 steps)).

mp 66-68 °C;  $\nu_{\text{max}}$  (neat) /cm<sup>-1</sup> 2956, 1726, 1466, 1254, 1074, 844, 777; <sup>1</sup>H NMR (400 MHz, CDCl<sub>3</sub>)  $\delta$  8.26 (ddd, *J* = 5.5, 1.0, 0.5 Hz, 1H), 8.15 (d, *J* = 1.0 Hz, 1H), 7.68 (dd, *J* = 11.0, 0.5 Hz, 1H), 4.31 (d, *J* = 7.5 Hz, 2H), 3.90 (s, 3H), 2.29 – 2.14 (m, *J* = 7.0 Hz, 1H), 0.84 (d, *J* = 6.5 Hz,

6H); **<sup>19</sup>F NMR** (376 MHz, DMSO)  $\delta$  -123.44 (dd,  $J$  = 11.0, 5.5 Hz); **<sup>13</sup>C NMR** (101 MHz, CDCl<sub>3</sub>)  $\delta$  164.5 (d,  $J$  = 4.0 Hz), 154.8 (d,  $J$  = 246.5 Hz), 135.6, 132.5 (d,  $J$  = 5.5 Hz), 125.1 (d,  $J$  = 10.5 Hz), 117.8 (d,  $J$  = 16.2 Hz), 113.6 (d,  $J$  = 2.5 Hz), 106.6 (t,  $J$  = 24.5 Hz), 55.5, 52.5, 29.2, 19.7; **HRMS** (ESI<sup>+</sup>) calc. C<sub>13</sub>H<sub>16</sub>FN<sub>2</sub>O<sub>2</sub> ([M+H]<sup>+</sup>) 251.1190; found 251.1205.

### 1-isobutyl-5-methoxy-1*H*-indazole (2k)

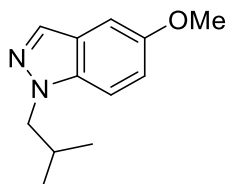

Prepared according to the general procedure from 5-methoxy-1*H*-indazole (2.00 g, 13.50 mmol, 1.0 equiv) and isobutyraldehyde. Hydrogenation followed the general procedure, with 5% Pt/C (0.039 equiv). The crude hydrogenated product was purified by flash silica chromatography (elution gradient 0 to 10% EtOAc in heptane) to afford the title compound as an off-white solid (1.45 g, 7.09 mmol, 53% yield (over 2 steps)).

**mp** 46-49 °C;  **$\nu_{\text{max}}$**  (neat) /cm<sup>-1</sup> 2968, 1626, 1468, 1288; **<sup>1</sup>H NMR** (400 MHz, DMSO-*d*<sub>6</sub>)  $\delta$  7.91 (d,  $J$  = 1.0 Hz, 1H), 7.57 (dt,  $J$  = 9.0, 1.0 Hz, 1H), 7.15 (d,  $J$  = 2.5 Hz, 1H), 7.02 (dd,  $J$  = 9.0, 2.5 Hz, 1H), 4.16 (d,  $J$  = 7.0 Hz, 2H), 3.78 (s, 3H), 2.24-2.14 (m, 1H), 0.83 (d,  $J$  = 6.5 Hz, 6H); **<sup>13</sup>C NMR** (101 MHz, DMSO-*d*<sub>6</sub>)  $\delta$  153.9, 135.6, 131.5, 123.5, 117.8, 110.7, 100.0, 55.3×2, 29.2, 19.8; **HRMS** (ESI<sup>+</sup>) calc. for C<sub>12</sub>H<sub>17</sub>N<sub>2</sub>O [M+H]<sup>+</sup> 205.1335, found 205.1346.

### 1-isobutyl-3-methyl-1*H*-indazole (2l)

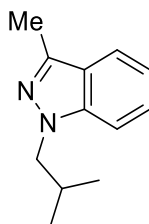

Prepared according to the general procedure from 3-methyl-1*H*-indazole (2.00 g, 15.31 mmol, 1.0 equiv) and isobutyraldehyde. Hydrogenation followed the general procedure, with 5% Pt/C (0.013 equiv). The crude hydrogenated product was purified by flash silica chromatography (elution gradient 0 to 20% EtOAc in heptane) to afford the title compound as a pale-yellow oil (2.01 g, 10.68 mmol, 71% yield (over 2 steps)).

$\nu_{\text{max}}$  (neat) / $\text{cm}^{-1}$  2959, 1615, 1507, 1453, 1350, 1198, 1074, 1009, 761, 738, 634, 430;  $^1\text{H NMR}$  (400 MHz,  $\text{DMSO}-d_6$ )  $\delta$  7.68 (dt,  $J$  = 8.0, 1.0 Hz, 1H), 7.55 (dt,  $J$  = 8.5, 1.0 Hz, 1H), 7.34 (ddd,  $J$  = 8.5, 7.0, 1.0 Hz, 1H), 7.08 (ddd,  $J$  = 7.5, 7.0, 1.0 Hz, 1H), 4.11 (d,  $J$  = 7.0 Hz, 2H), 2.48 (s, 3H), 2.29 – 2.11 (m, 1H), 0.84 (d,  $J$  = 7.0 Hz, 6H);  $^{13}\text{C NMR}$  (101 MHz,  $\text{DMSO}-d_6$ )  $\delta$  120.6, 119.8, 109.9, 55.4, 29.6, 20.4, 12.1; **HRMS** ( $\text{ESI}^+$ ) calc. for  $\text{C}_{12}\text{H}_{17}\text{N}_2$   $[\text{M}+\text{H}]^+$  189.1386, found 189.1395.

**Methyl 5-bromo-1(cyclohexylmethyl)-1H-indazole-6-carboxylate (2m)**

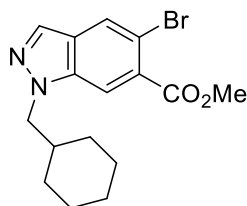

Prepared according to the general procedure from methyl 5-bromo-1H-indazole-6-carboxylate (2.00 g, 7.84 mmol, 1.0 equiv) and cyclohexanecarboxaldehyde. Hydrogenation followed the general procedure, with 5% Pt/C (0.013 equiv). The crude hydrogenated product was purified by flash silica chromatography (elution gradient 0 to 20% EtOAc in heptane) to afford the title compound as a pale-yellow oil (1.77 g, 5.04 mmol, 64% yield (over 2 steps)).

$\nu_{\text{max}}$  (neat) / $\text{cm}^{-1}$  2924, 1731, 1468, 1284, 1253;  $^1\text{H NMR}$  (400 MHz,  $\text{CDCl}_3$ ) 8.01 (d,  $J$  = 1.0 Hz, 2H), 7.96 (d,  $J$  = 1.0 Hz, 1H), 7.84 (t,  $J$  = 1.0 Hz, 1H), 4.20 (d,  $J$  = 7.0 Hz, 2H), 3.99 (s, 3H), 2.06–1.94 (m, 1H), 1.73–1.65 (m, 3H), 1.58–1.54 (m, 2H), 1.27–1.13 (m, 3H), 1.07–0.97 (m, 2H);  $^{13}\text{C NMR}$  (101 MHz,  $\text{CDCl}_3$ )  $\delta$  167.3, 138.2, 132.1, 129.8, 126.5, 126.4, 112.7, 115.4, 55.7, 52.8, 38.9, 31.0, 26.4, 25.8; **HRMS** ( $\text{ESI}^+$ ) calc. for  $\text{C}_{16}\text{H}_{20}^{79}\text{BrN}_2\text{O}_2$   $[\text{M}+\text{H}]^+$  351.0703, found 351.0706.

**1-(cyclohexylmethyl)-1H-indazole (2n)**

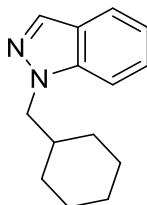

Prepared according to the general procedure from 1H-indazole (2.00 g, 16.93 mmol, 1.0 equiv) and cyclohexanecarboxaldehyde. Hydrogenation followed the general procedure, with 5% Pt/C (0.013 equiv). The crude hydrogenated product was purified by flash silica chromatography (elution gradient 0 to 5% EtOAc in heptane) to afford the title compound as a clear oil (2.35 g, 11.00 mmol, 65% yield (over 2 steps)).

$\nu_{\text{max}}$  (neat) / $\text{cm}^{-1}$  2921, 2850, 1464, 1448, 750, 737;  $^1\text{H NMR}$  (400 MHz,  $\text{DMSO}-d_6$ )  $\delta$  8.04 (d,  $J$  = 1.0 Hz, 1H), 7.74 (dt,  $J$  = 8.0, 1.0 Hz, 1H), 7.64 (dq,  $J$  = 8.5, 1.0 Hz, 1H), 7.35 (ddd,  $J$  = 8.5, 7.0, 1.0 Hz, 1H), 7.11 (ddd,  $J$  = 8.0, 7.0, 1.0 Hz, 1H), 4.23 (d,  $J$  = 7.0 Hz, 2H), 1.95–1.84 (m, 1H), 1.67 – 1.59 (m, 2H), 1.59 – 1.54 (m, 1H), 1.51 – 1.41 (m, 2H), 1.17 – 1.06 (m, 3H), 1.00 (qd,  $J$  = 12.0, 3.0 Hz, 2H);  $^{13}\text{C NMR}$  (101 MHz,  $\text{DMSO}-d_6$ )  $\delta$  132.3, 125.7, 120.7, 120.1, 109.7, 53.9, 38.3, 30.1, 25.8, 25.1; **HRMS** ( $\text{ESI}^+$ ) calc. for  $\text{C}_{14}\text{H}_{19}\text{N}_2$   $[\text{M}+\text{H}]^+$  215.1543, found 215.1557.

### 1-(cyclopentylmethyl)-1H-indazole (2o)

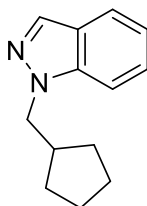

Prepared according to the general procedure from 1H-indazole (2.00 g, 16.93 mmol, 1.0 equiv) and cyclopentanecarboxaldehyde. Hydrogenation followed the general procedure, with 5% Pt/C (0.013 equiv). The crude hydrogenated product was purified by flash silica chromatography (elution gradient 0 to 4% EtOAc in heptane) to afford the title compound as an orange oil (1.79 g, 8.97 mmol, 53% yield (over 2 steps)).

$\nu_{\text{max}}$  (neat) / $\text{cm}^{-1}$  2950, 1616, 1464, 1296;  $^1\text{H NMR}$  (400 MHz,  $\text{DMSO}-d_6$ )  $\delta$  8.04 (d,  $J$  = 1.0 Hz, 1H), 7.74 (dt,  $J$  = 8.0, 1.0 Hz, 1H), 7.66 (dq,  $J$  = 8.5, 1.0 Hz, 1H), 7.36 (ddd,  $J$  = 8.5, 7.0, 1.0 Hz, 1H), 7.11 (ddd,  $J$  = 8.0, 7.0, 1.0 Hz, 1H), 4.31 (d,  $J$  = 7.5 Hz, 2H), 2.49 – 2.40 (m, 1H), 1.65 – 1.42 (m, 6H), 1.33 – 1.21 (m, 2H);  $^{13}\text{C NMR}$  (101 MHz,  $\text{DMSO}-d_6$ )  $\delta$  139.3, 132.2, 125.7, 123.3, 120.7, 120.1, 109.6, 52.4, 40.2, 29.7, 24.4; **HRMS** ( $\text{ESI}^+$ ) calc. for  $\text{C}_{13}\text{H}_{17}\text{N}_2$   $[\text{M}+\text{H}]^+$  201.1386, found 201.1397.

### 1-(2-methylbutyl)-1H-indazole (2p)

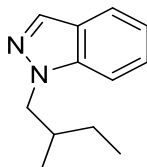

Prepared according to the general procedure from 1H-indazole (2.00 g, 16.93 mmol, 1.0 equiv) and 2-methylbutyraldehyde. Hydrogenation followed the general procedure, with 5% Pt/C (0.039 equiv). The crude hydrogenated product was purified by flash silica

chromatography (elution gradient 0 to 10% EtOAc in heptane) to afford the title compound as a clear oil (2.33 g, 12.36 mmol, 73% yield (over 2 steps)).

$\nu_{\text{max}}$  (neat) / $\text{cm}^{-1}$  2950, 1616, 1464, 1296;  $^1\text{H NMR}$  (400 MHz,  $\text{DMSO-}d_6$ )  $\delta$  8.05 (d,  $J$  = 1.0 Hz, 1H), 7.75 (dt,  $J$  = 8.0, 1.0 Hz, 1H), 7.64 (dq,  $J$  = 8.5, 1.0 Hz, 1H), 7.36 (ddd,  $J$  = 8.5, 7.0, 1.0 Hz, 1H), 7.11 (ddd,  $J$  = 8.0, 7.0, 1.0 Hz, 1H), 4.29 (dd,  $J$  = 14.0, 6.5 Hz, 1H), 4.19 (dd,  $J$  = 14.0, 7.5 Hz, 1H), 2.09 – 1.91 (m, 1H), 1.42 – 1.24 (m, 1H), 1.21 – 1.05 (m, 1H), 0.86 (t,  $J$  = 7.5 Hz, 3H), 0.79 (d,  $J$  = 7.0 Hz, 3H);  $^{13}\text{C NMR}$  (101 MHz,  $\text{DMSO-}d_6$ )  $\delta$  139.6, 132.3, 125.8, 123.3, 120.7, 120.1, 109.6, 53.6, 35.4, 26.2, 16.7, 10.9; **HRMS** ( $\text{ESI}^+$ ) calc. for  $\text{C}_{12}\text{H}_{17}\text{N}_2$   $[\text{M}+\text{H}]^+$  189.1386, found 189.1392.

### 1-(2-ethylhexyl)-1H-indazole (2q)

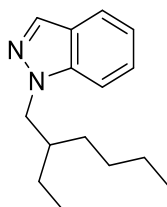

Prepared according to the general procedure from 1H-indazole (2.00 g, 16.93 mmol, 1.0 equiv) and 2-ethylhexanal. Hydrogenation followed the general procedure, with 5% Pt/C (0.039 equiv). The crude hydrogenated product was purified by flash silica chromatography (elution gradient 0 to 5% EtOAc in heptane) to afford the title compound as a pale-yellow oil (3.33 g, 14.43 mmol, 85% yield (over 2 steps)).

$\nu_{\text{max}}$  (neat) / $\text{cm}^{-1}$  2958, 1616, 1465, 1241;  $^1\text{H NMR}$  (400 MHz,  $\text{DMSO-}d_6$ )  $\delta$  8.04 (d,  $J$  = 1.0 Hz, 1H), 7.74 (dt,  $J$  = 8.0, 1.0 Hz, 1H), 7.61 (dq,  $J$  = 8.5, 1.0 Hz, 1H), 7.36 (ddd,  $J$  = 8.5, 7.0, 1.0 Hz, 1H), 7.11 (ddd,  $J$  = 8.0, 7.0, 1.0 Hz, 1H), 4.28 (d,  $J$  = 7.0 Hz, 2H), 1.95 (m, 1H), 1.21 (m, 8H), 0.84 (t,  $J$  = 7.5 Hz, 3H), 0.79 (t,  $J$  = 7.0 Hz, 3H);  $^{13}\text{C NMR}$  (101 MHz,  $\text{DMSO-}d_6$ )  $\delta$  139.6, 132.2, 125.8, 123.3, 120.7, 120.1, 109.5, 51.5, 39.5, 29.9, 27.9, 23.4, 22.3, 13.7, 10.4; **HRMS** ( $\text{ESI}^+$ ) calc. for  $\text{C}_{15}\text{H}_{23}\text{N}_2$   $[\text{M}+\text{H}]^+$  231.1855, found 231.1865.

### 1-((tetrahydro-2H-pyran-4-yl)methyl)-1H-indazole (2r)

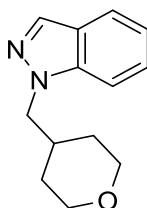

Prepared according to the general procedure from 1*H*-indazole (2.00 g, 16.93 mmol, 1.0 equiv) and tetrahydropyran-4-carbaldehyde. Hydrogenation followed the general procedure, with 5% Pt/C (0.039 equiv). The crude hydrogenated product was purified by flash silica chromatography (elution gradient 0 to 30% EtOAc in heptane) to afford the title compound as a white solid (2.19 g, 10.12 mmol, 60% yield (over 2 steps)).

**mp** 71-73 °C; **v<sub>max</sub>** (neat) /cm<sup>-1</sup> 2937, 1436, 1093, 743, 444; **<sup>1</sup>H NMR** (400 MHz, DMSO-*d*<sub>6</sub>) δ 8.05 (d, *J* = 1.0 Hz, 1H), 7.75 (dt, *J* = 8.0, 1.0 Hz, 1H), 7.69 (dq, *J* = 8.5, 1.0 Hz, 1H), 7.37 (ddd, *J* = 8.5, 7.0, 1.0 Hz, 1H), 7.12 (ddd, *J* = 8.0, 7.0, 1.0 Hz, 1H), 4.30 (d, *J* = 7.0 Hz, 2H), 3.80 (ddd, *J* = 11.5, 4.0, 2.0 Hz, 2H), 3.21 (td, *J* = 11.5, 3.0 Hz, 2H), 2.21 – 2.07 (m, 1H), 1.40 – 1.22 (m, 4H); **<sup>13</sup>C NMR** (101 MHz, DMSO-*d*<sub>6</sub>) δ 140.2, 133.0, 126.4, 123.8, 121.2, 120.7, 110.2, 67.0, 53.8, 36.3, 30.6; **HRMS** (ESI<sup>+</sup>) calc. for C<sub>13</sub>H<sub>17</sub>N<sub>2</sub>O [M+H]<sup>+</sup> 217.1335, found 217.1350.

#### Methyl 1-isopentyl-1*H*-indazole-3-carboxylate (**2s**)

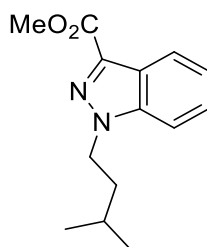

Prepared according to the general procedure from methyl 1*H*-indazole-3-carboxylate (2.00 g, 11.35 mmol, 1.0 equiv) and isovaleraldehyde. Hydrogenation followed the general procedure, with 5% Pt/C (0.039 equiv). The crude hydrogenated product was purified by flash silica chromatography (elution gradient 0 to 10% EtOAc in heptane) to afford the title compound as a yellow oil (1.25 g, 5.12 mmol, 45% yield (over 2 steps)).

**v<sub>max</sub>** (neat) /cm<sup>-1</sup> 2955, 1710, 1478, 1226, 1158, 1117, 745; **<sup>1</sup>H NMR** (400 MHz, CDCl<sub>3</sub>) δ 8.23 (dt, *J* = 8.0, 1.0 Hz, 1H), 7.50 – 7.39 (m, 2H), 7.31 (ddd, *J* = 8.0, 6.5, 1.5 Hz, 1H), 4.53 – 4.44 (m, 2H), 4.03 (s, 3H), 1.91 – 1.79 (m, 2H), 1.69 – 1.56 (m, 1H), 0.98 (d, *J* = 6.5 Hz, 6H); **<sup>13</sup>C NMR** (101 MHz, CDCl<sub>3</sub>) δ 138.9, 132.1, 125.6, 123.6, 120.7, 120.2, 109.6, 58.3, 31.9, 24.2; **HRMS** (ESI<sup>+</sup>) calc. C<sub>14</sub>H<sub>19</sub>N<sub>2</sub>O<sub>2</sub> ([M+H]<sup>+</sup>) 247.1441; found 247.1453.

### Methyl 5-bromo-1-(2-phenylethyl)-1H-indazole-6-carboxylate (2t)

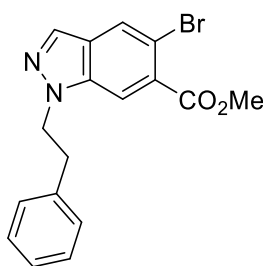

Prepared according to the general procedure from methyl 5-bromo-1H-indazole-6-carboxylate (2.00 g, 7.84 mmol, 1.0 equiv) and phenylacetaldehyde. The crude hydrogenated product was purified by flash silica chromatography (elution gradient 0 to 20% EtOAc in heptane) to afford the title compound as a dark-yellow oil (1.04 g, 2.90 mmol, 38% yield (over 2 steps)).

$\nu_{\text{max}}$  (neat) /cm<sup>-1</sup> 2949, 1730, 1467, 1254, 1238; <sup>1</sup>H NMR (400 MHz, DMSO-*d*<sub>6</sub>)  $\delta$  8.13 (d, *J* = 1.0 Hz, 1H), 8.12 (d, *J* = 1.0 Hz, 1H), 7.94 (t, *J* = 1.0 Hz, 1H), 7.20-7.13 (m, 5H), 4.70 (t, *J* = 7.0 Hz, 2H), 3.88 (s, 3H), 3.14 (t, *J* = 7.0 Hz, 2H); <sup>13</sup>C NMR (101 MHz, CDCl<sub>3</sub>)  $\delta$  166.7, 138.2, 137.4, 132.3, 129.7, 128.7, 128.2, 126.3, 125.5 $\times$ 2, 112.5, 109.6, 52.5, 49.8, 35.5; HRMS (ESI<sup>+</sup>) calc. for [M+H]<sup>+</sup> 359.0389, found 359.0379.

### 1-cyclopentyl-1H-indazole (2u)

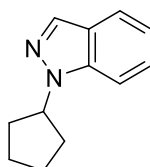

Prepared according to the general procedure from 1H-indazole (2.00 g, 16.93 mmol, 1.0 equiv) and cyclopentanone. Hydrogenation followed the general procedure, with 5% Pt/C (0.039 equiv). The crude hydrogenated product was purified by flash silica chromatography (elution gradient 0 to 20% EtOAc in heptane) to afford the title compound as a clear oil (0.97 g, 5.27 mmol, 31% yield (over 2 steps)).

$\nu_{\text{max}}$  (neat) /cm<sup>-1</sup> 2955, 1614, 1206, 911, 751, 737, 429; <sup>1</sup>H NMR (400 MHz, DMSO)  $\delta$  8.04 (d, *J* = 1.0 Hz, 1H), 7.74 (dt, *J* = 8.0, 1.0 Hz, 1H), 7.67 (dd, *J* = 8.5, 1.0 Hz, 1H), 7.36 (ddd, *J* = 8.5, 7.0, 1.0 Hz, 1H), 7.12 (ddd, *J* = 8.0, 7.0, 0.8 Hz, 1H), 5.21 – 5.07 (m, 1H), 2.18 – 2.06 (m, 2H), 2.06 – 1.95 (m, 2H), 1.92 – 1.81 (m, 2H), 1.73 – 1.62 (m, 2H); <sup>13</sup>C NMR (101 MHz, DMSO)  $\delta$

138.9, 132.1, 125.6, 123.6, 120.7, 120.2, 109.6, 58.3, 31.9, 24.2; **HRMS** (ESI<sup>+</sup>) calc. C<sub>12</sub>H<sub>15</sub>N<sub>2</sub> ([M+H]<sup>+</sup>) 187.1230; found 187.1242.

**Methyl 1-cyclohexyl-1*H*-indazole-3-carboxylate (2v)**

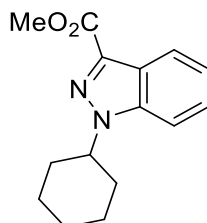

Prepared according to the general procedure from methyl 1*H*-indazole-3-carboxylate (2.00 g, 11.35 mmol, 1.0 equiv) and cyclohexanone. Hydrogenation followed the general procedure, with 5% Pt/C (0.039 equiv). The crude hydrogenated product was purified by flash silica chromatography (elution gradient 0 to 10% EtOAc in heptane) to afford the title compound as a pale-yellow oil (1.56 g, 6.04 mmol, 53% yield (over 2 steps)).

**v**<sub>max</sub> (neat) /cm<sup>-1</sup> 2930, 1710, 1475, 1166, 1121, 750; **<sup>1</sup>H NMR** (400 MHz, DMSO) δ 8.24 (dt, *J* = 8.0, 1.0 Hz, 1H), 7.53 (dt, *J* = 8.5, 1.0 Hz, 1H), 7.41 (ddd, *J* = 8.5, 7.0, 1.0 Hz, 1H), 7.30 (ddd, *J* = 8.0, 7.0, 1.0 Hz, 1H), 4.52 (tt, *J* = 11.5, 4.5 Hz, 1H), 4.03 (s, 3H), 2.23 – 2.04 (m, 4H), 1.98 (dt, *J* = 13.5, 3.0 Hz, 2H), 1.83 – 1.72 (m, 1H), 1.57 – 1.41 (m, 2H), 1.37 (tt, *J* = 13.0, 3.0 Hz, 1H); **<sup>13</sup>C NMR** (101 MHz, DMSO) δ 163.4, 139.9, 134.4, 126.5, 124.1, 123.1, 122.4, 110.0, 59.6, 52.1, 32.4, 25.8, 25.3; **HRMS** (ESI<sup>+</sup>) calc. C<sub>15</sub>H<sub>19</sub>N<sub>2</sub>O<sub>2</sub> ([M+H]<sup>+</sup>) 259.1441; found 259.1453.

## Mechanistic Investigations

### Synthesis and Characterisation of Intermediates

#### Methyl 5-bromo-1-(2-methylprop-1-en-1-yl)-1*H*-indazole-6-carboxylate (4a)

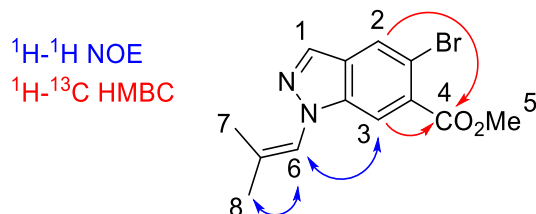

Isobutyraldehyde (2.1 mL, 23.53 mmol, 3.0 equiv) was added to methyl 5-bromo-1*H*-indazole-6-carboxylate (2.0 g, 7.84 mmol, 1.0 equiv) and *p*TSA·H<sub>2</sub>O (0.38 g, 1.96 mmol, 0.25 equiv) in PhMe (30 mL) in a 50 mL EasyMax reactor vessel. A Dean-Stark condenser was equipped and the reaction mixture was heated to a vigorous reflux (jacket temperature = 140 °C) for 5 h. Et<sub>3</sub>N (0.27 mL, 1.96 mmol, 0.25 equiv) was added, then the reaction mixture was cooled to rt. The reaction mixture was washed with H<sub>2</sub>O (8 mL), sat. brine (8 mL), and concentrated to afford crude product. The crude product was purified by flash silica chromatograph (elution gradient 0 to 20% EtOAc in heptane) to afford the title compound as a pale-orange solid (1.56 g, 5.05 mmol, 64%).

**mp** 87-89 °C; **v**<sub>max</sub> (neat) /cm<sup>-1</sup> 2967, 1723, 1448, 1409, 1240, 771; **<sup>1</sup>H NMR** (400 MHz, DMSO-*d*<sub>6</sub>) δ 8.27 (d, *J* = 1.0 Hz, 1H, **H1**), 8.21 (d, *J* = 0.5 Hz, 1H, **H2**), 7.97 (dd, *J* = 1.0, 0.5 Hz, 1H, **H3**), 7.02 (hept, *J* = 1.5 Hz, 1H, **H6**), 3.90 (s, 3H, **H5**), 1.93 (d, *J* = 1.5 Hz, 3H, **H8**), 1.78 (d, *J* = 1.5 Hz, 3H, **H7**); **<sup>13</sup>C NMR** (101 MHz, DMSO-*d*<sub>6</sub>) δ 166.5 (**C4**), 137.2, 133.5, 131.8, 130.4, 125.8, 125.3, 119.0, 112.6, 110.5, 52.7, 22.5, 18.3; **HRMS** (ESI<sup>+</sup>) calc. for C<sub>13</sub>H<sub>14</sub><sup>79</sup>BrN<sub>2</sub>O<sub>2</sub> ([M+H]<sup>+</sup>) 309.0233; found 309.0232.

#### Dimethyl 1,1'-(2-methylpropane-1,1-diyl)bis(5-bromo-1*H*-indazole-6-carboxylate) (5a)

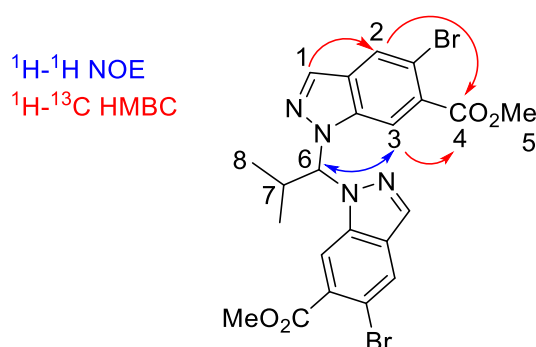

Isobutyraldehyde (0.39 mL, 4.30 mmol, 2.2 equiv) was added to methyl 5-bromo-1*H*-indazole-6-carboxylate (1.0 g, 3.92 mmol, 1.0 equiv), *p*TSA·H<sub>2</sub>O (75.7 mg, 0.39 mmol, 0.20 equiv), and molecular sieves (4 Å, 3.0 g) in PhMe (15 mL). The reaction mixture was heated to reflux for 3 h. The reaction mixture was cooled to rt, filtered through arbocel, and washed with EtOAc (40 mL). The filtrate was washed with sat. NaHCO<sub>3</sub> (15 mL), sat. brine (10 mL), dried with MgSO<sub>4</sub>, filtered, and concentrated to afford crude product. The crude product was purified by flash silica chromatograph (elution gradient 0 to 30% EtOAc in heptane) to afford the title compound as an off-white solid (0.51 g, 0.91 mmol, 47%).

**mp** 77-79 °C; **v**<sub>max</sub> (neat) /cm<sup>-1</sup> 2952, 1728, 1464, 1254, 1099, 803; **<sup>1</sup>H NMR** (400 MHz, CDCl<sub>3</sub>) δ 8.57 (s, 2H, **H3**), 8.23 (s, 2H, **H1**), 8.15 (s, 2H, **H2**), 7.41 (d, *J* = 10.5 Hz, 1H, **H6**), 3.94 (s, 6H, **H5**), 3.69 – 3.60 (m, 1H, **H7**), 0.87 (d, *J* = 6.5 Hz, 6H); **<sup>13</sup>C NMR** (101 MHz, CDCl<sub>3</sub>) δ 166.5 (**C4**), 137.5, 134.2 (**C1**), 130.5, 126.2 (**C2**), 126.1, 112.7 (**C3**), 110.8, 75.4, 52.8, 30.5, 18.1; **HRMS** (ESI<sup>+</sup>) calc. for C<sub>13</sub>H<sub>14</sub><sup>79</sup>BrN<sub>2</sub>O<sub>2</sub> ([M-C<sub>9</sub>H<sub>6</sub>BrN<sub>2</sub>O<sub>2</sub>]<sup>+</sup>) 309.0233; found 309.0240.

#### Methyl 5-bromo-2-(2-methylallyl)-2*H*-indazole-6-carboxylate

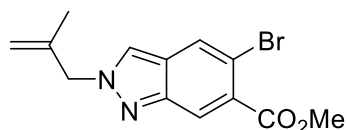

Prepared according to a modified literature procedure.<sup>12</sup>

1,8-Diazabicyclo[5.4.0]undec-7-ene (45 μL, 0.30 mmol, 0.3 equiv) was added to a solution of 2-methyl-2-propen-1-ol (0.25 mL, 3.00 mmol, 3.0 equiv) and trichloroacetonitrile (0.45 mL, 4.50 mmol, 4.5 equiv) in CH<sub>2</sub>Cl<sub>2</sub> (6 mL). The reaction mixture was stirred at rt for 5 h. Methyl 5-bromo-1*H*-indazole-6-carboxylate (0.26 g, 1.00 mmol, 1.0 equiv) was added and allowed to dissolve. Triflic acid (0.12 mL, 1.33 mmol, 1.3 equiv) was added. The reaction mixture was stirred at rt for 18 h. The reaction mixture was washed with 1 M NaOH (2 mL×2) and H<sub>2</sub>O (2 mL). The combined aqueous layers were extracted with CH<sub>2</sub>Cl<sub>2</sub> (2 mL×2). The combined organic layers were dried over MgSO<sub>4</sub>, filtered, and concentrated to afford crude product. The crude product was purified by flash silica chromatography (elution gradient 0 to 20% EtOAc in heptane) to afford the title compound as a brown oil (0.18 g, 0.59 mmol, 59% yield).

**v**<sub>max</sub> (neat) /cm<sup>-1</sup> 2947, 1716, 1475, 1256; **<sup>1</sup>H NMR** (400 MHz, CDCl<sub>3</sub>) δ 8.19 (t, *J* = 1.0, 1H), 7.97 (d, *J* = 1.0, 1H), 7.92 (d, *J* = 1.0, 1H), 5.08 – 5.05 (m, 1H), 4.98 (br s, 2H), 4.93 – 4.91 (m, 1H),

3.96 (s, 3H), 1.70 – 1.69 (m, 1H);  $^{13}\text{C}$  NMR (101 MHz,  $\text{CDCl}_3$ )  $\delta$  167.2, 146.6, 139.7, 130.0, 125.3, 124.1, 122.5, 122.0, 115.5, 112.2, 60.3, 52.5, 19.7; HRMS (ESI<sup>+</sup>) calc. for  $\text{C}_{13}\text{H}_{14}^{79}\text{BrN}_2\text{O}_2$  ([M+H]<sup>+</sup>) 309.0233; found 309.0232.

**Methyl 5-bromo-2-(2-methylprop-1-en-1-yl)-2H-indazole-6-carboxylate (6a)**

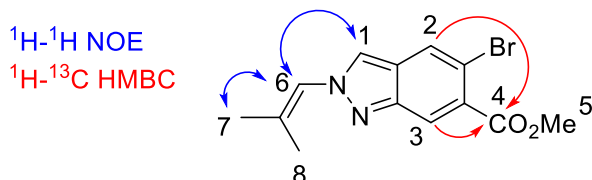

methyl 5-bromo-2-(2-methylallyl)-2H-indazole-6-carboxylate (50 mg, 0.16 mmol, 1.0 equiv) was added to a solution of  $\text{KO}^t\text{Bu}$  (18 mg, 0.16 mmol, 1.0 equiv) in DMSO (0.5 mL). The reaction mixture was stirred at rt until full conversion to the enamine. MeI (20  $\mu\text{L}$ , 0.32 mmol, 2.0 equiv) was added, and the reaction stirred until full conversion. The reaction mixture was diluted with EtOAc (10 mL), then washed with  $\text{H}_2\text{O}$  (10 mL), sat. brine (10 mL), dried with  $\text{MgSO}_4$ , filtered, and concentrated to afford crude product. The crude product was purified by flash silica chromatography (elution gradient 0 to 20% EtOAc in heptane) to afford the title compound as a clear oil (18 mg, 0.06 mmol, 10% yield).

$\nu_{\text{max}}$  (neat) / $\text{cm}^{-1}$  2916, 1714, 1452, 1255;  $^1\text{H}$  NMR (400 MHz,  $\text{CDCl}_3$ )  $\delta$  8.18 (t,  $J$  = 1.0 Hz, 1H, **H3**), 7.97 (d,  $J$  = 1.0 Hz, 1H, **H2**), 7.91 (d,  $J$  = 1.0 Hz, 1H, **H1**), 6.97 – 6.90 (m, 1H, **H6**), 3.96 (s, 3H, **H5**), 1.96 (d,  $J$  = 1.5 Hz, 3H, **H7**), 1.91 (d,  $J$  = 1.5 Hz, 3H, **H8**);  $^{13}\text{C}$  NMR (101 MHz,  $\text{CDCl}_3$ ) 167.3 (**C4**), 146.6, 135.0, 130.3, 125.4, 123.7, 123.3, 123.0, 122.2, 112.4, 52.7, 23.4, 18.7; HRMS (ESI<sup>+</sup>) calc. for  $\text{C}_{13}\text{H}_{14}^{79}\text{BrN}_2\text{O}_2$  ([M+H]<sup>+</sup>) 309.0233; found 309.0201.

**NB:** Initial isomerisation causes significant levels of ester hydrolysis. Addition of MeI required to reform the methyl ester *in situ*.

**Methyl 5-bromo-2-(1-(5-bromo-6-(methoxycarbonyl)-1*H*-indazol-1-yl)-2-methylpropyl)-2*H*-indazole-6-carboxylate (7a)**

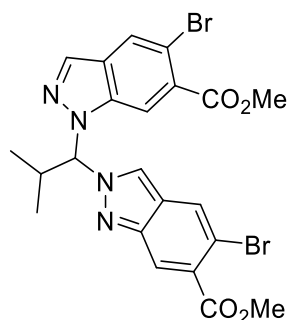

methyl 5-bromo-1*H*-indazole-6-carboxylate (2.0 g, 7.84 mmol, 1.0 equiv) and *p*TSA·H<sub>2</sub>O (0.37 g, 1.96 mmol, 0.25equiv) in PhMe (30 mL) were heated to a vigorous reflux (jacket temperature = 140 °C) in a 50 mL EasyMax reactor vessel. Isobutyraldehyde (2.1 mL, 23.53 mmol, 3.0 equiv) was added, and the reaction mixture was stirred for 1 min. Et<sub>3</sub>N (0.27 mL, 1.96 mmol, 0.25 equiv) was added, then the reaction mixture was cooled to rt. The reaction mixture was washed with H<sub>2</sub>O (8 mL), 1 M HCl (8 mL), sat. brine (8 mL), dried over MgSO<sub>4</sub>, filtered, and concentrated to afford crude product. The crude product was purified by flash silica chromatograph (elution gradient 0 to 50% EtOAc in heptane) to afford the title compound as an off-white solid (0.15 g, 0.27 mmol, 7% yield).

**mp** 180-182 °C; **v**<sub>max</sub> (neat) /cm<sup>-1</sup> 2952, 1712, 1697, 1465, 1256; **<sup>1</sup>H NMR** (400 MHz, DMSO-*d*<sub>6</sub>) δ 8.80 (s, 1H), 8.59 (s, 1H), 8.33 (s, 1H), 8.20 (s, 1H), 8.16 (s, 1H), 8.05 (s, 1H), 7.32 (d, *J* = 10.5 Hz, 1H), 3.95 (s, 3H), 3.85 (s, 3H), 3.54 – 3.44 (m, 1H), 0.88 – 0.83 (m, 6H); **<sup>13</sup>C NMR** (DMSO, 101 MHz) δ 166.6×2, 145.2, 138.1, 135.0, 131.0, 130.9, 126.1×2, 126.0, 123.7, 123.0, 120.8, 112.4, 111.0, 110.7, 78.4, 52.8, 52.3, 31.6, 18.0×2; **HRMS** (ESI<sup>+</sup>) calc. for C<sub>13</sub>H<sub>14</sub><sup>79</sup>BrN<sub>2</sub>O<sub>2</sub> ([M-C<sub>9</sub>H<sub>6</sub>BrN<sub>2</sub>O<sub>2</sub>]<sup>+</sup>) 309.0233; found 309.0219.

## NMR Spectra for Assignment

### Methyl 5-bromo-1-(2-methylprop-1-en-1-yl)-1H-indazole-6-carboxylate (4a)

$^1\text{H}$  NMR (400 MHz,  $\text{CDCl}_3$ )

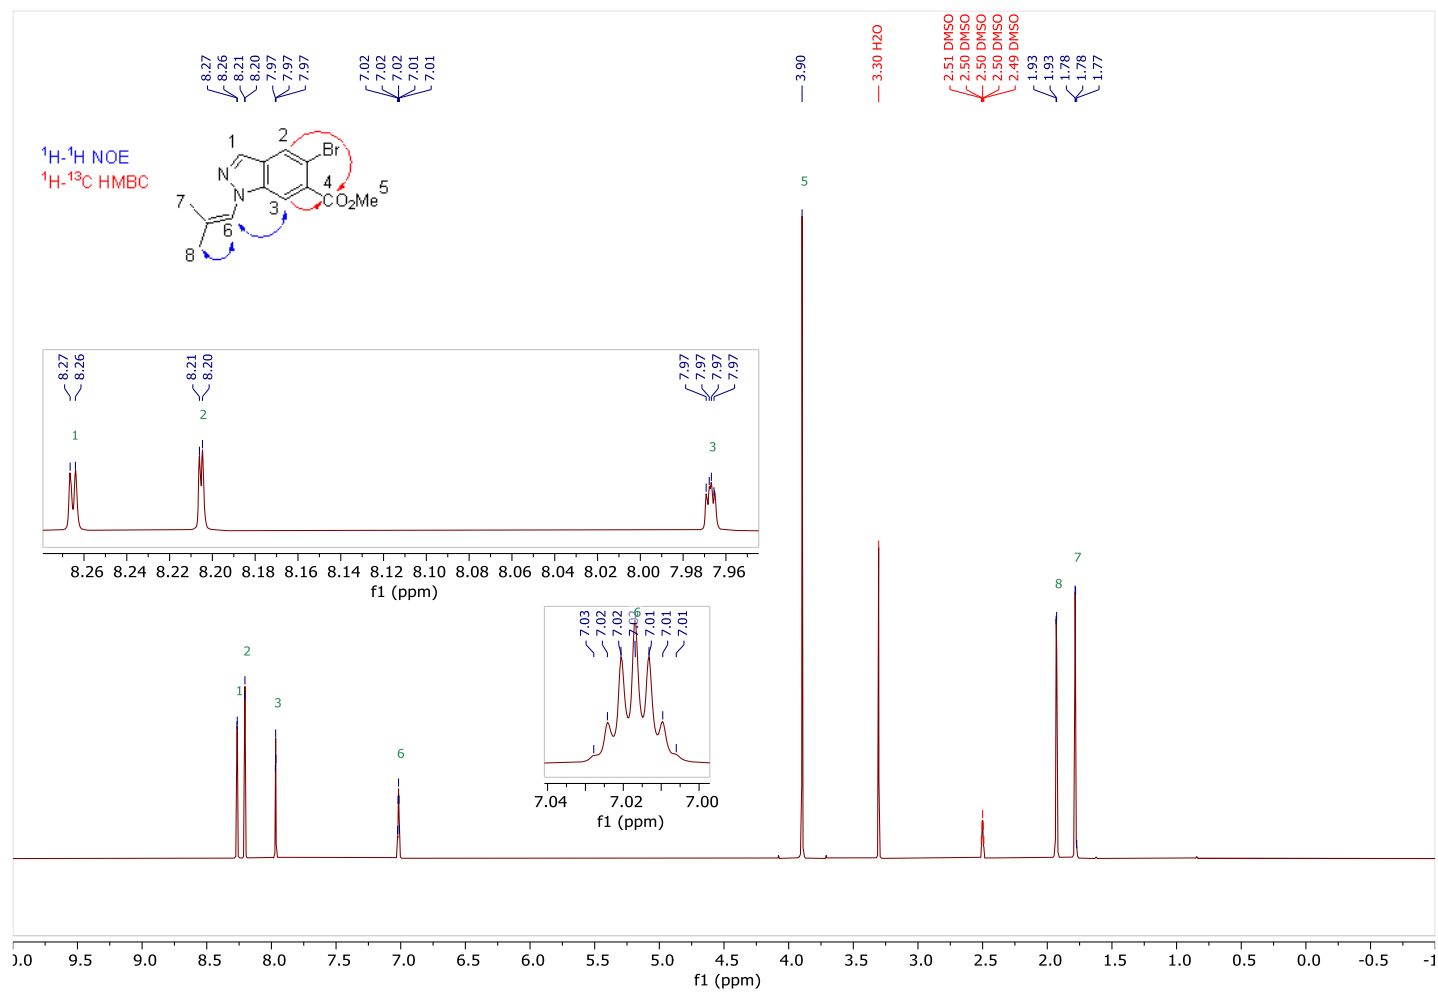

**$^{13}\text{C}$  NMR (101 MHz,  $\text{CDCl}_3$ )**

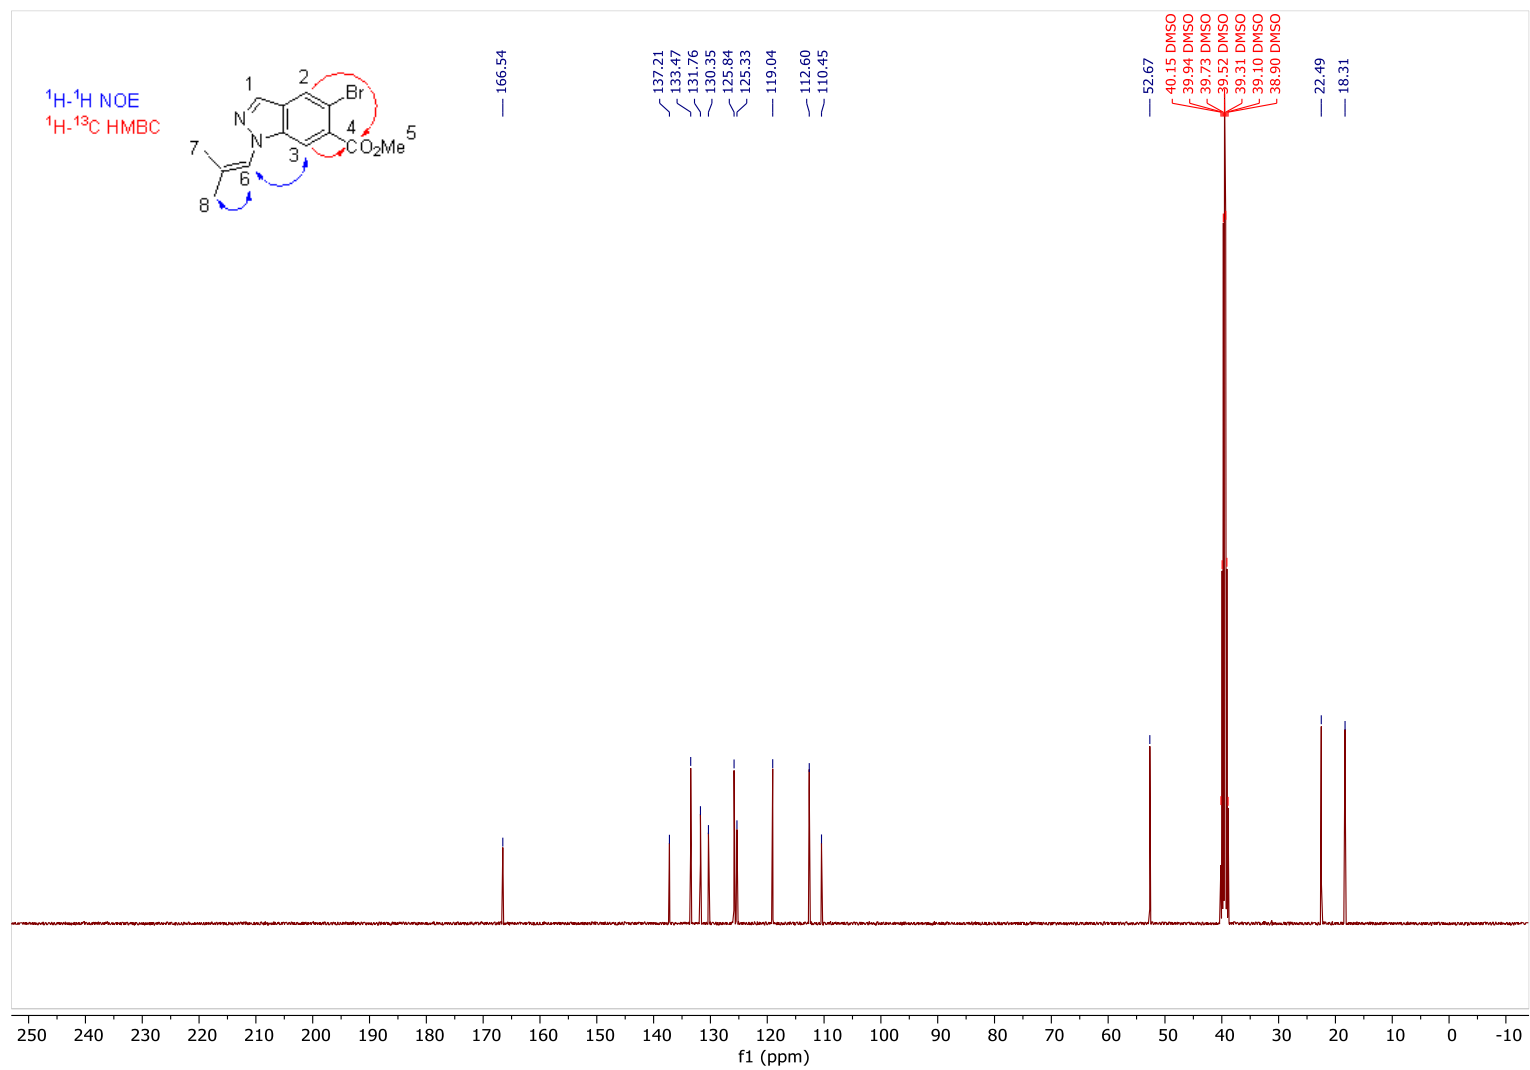

$^1\text{H}$ - $^{13}\text{C}$  HMBC ( $\text{CDCl}_3$ )

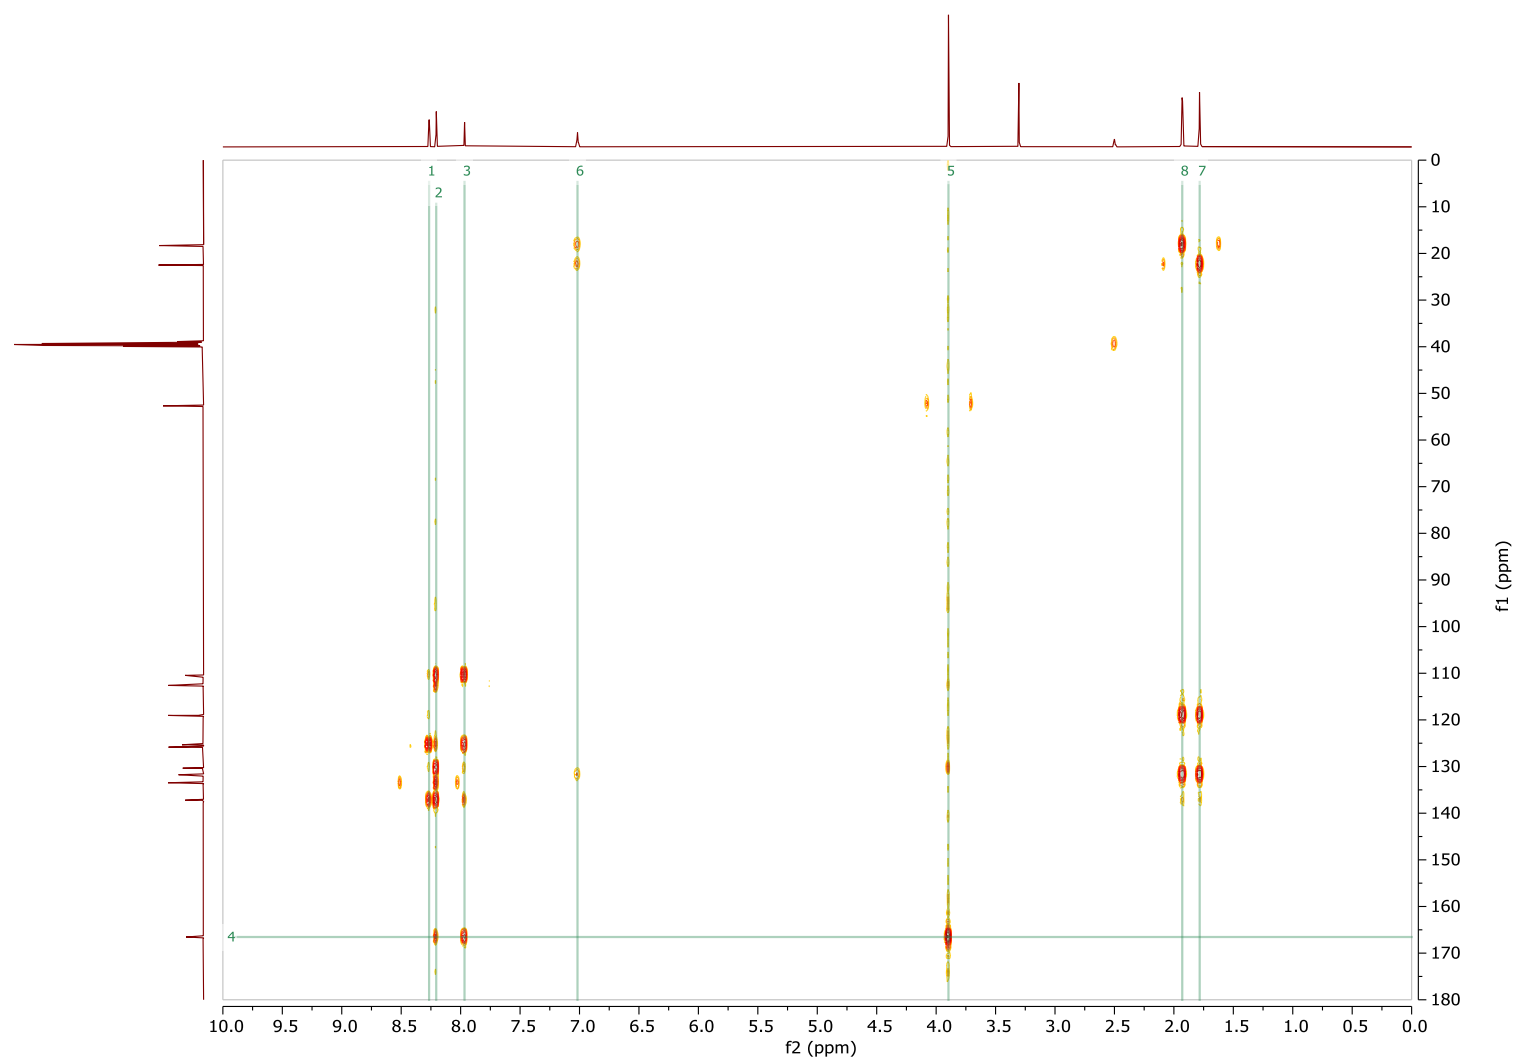

**$^1\text{H}$ - $^1\text{H}$  NOESY (400 MHz,  $\text{CDCl}_3$ )**

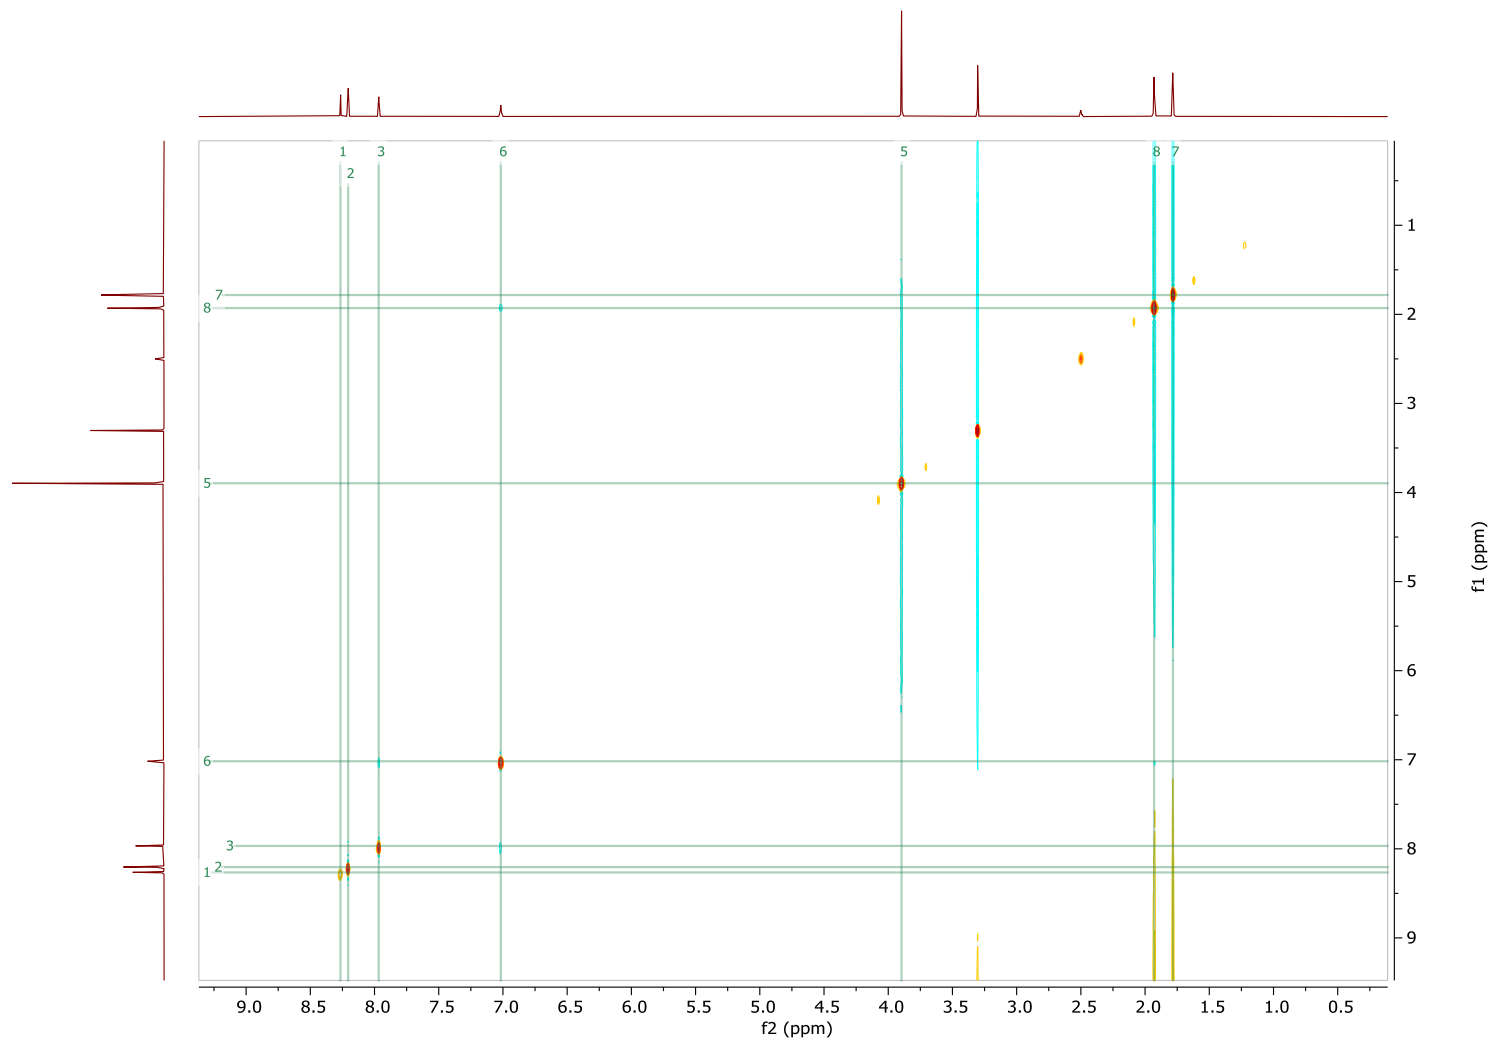

**Dimethyl 1,1'-(2-methylpropane-1,1-diyl)bis(5-bromo-1*H*-indazole-6-carboxylate) (5a)**

<sup>1</sup>H NMR (400 MHz, CDCl<sub>3</sub>)

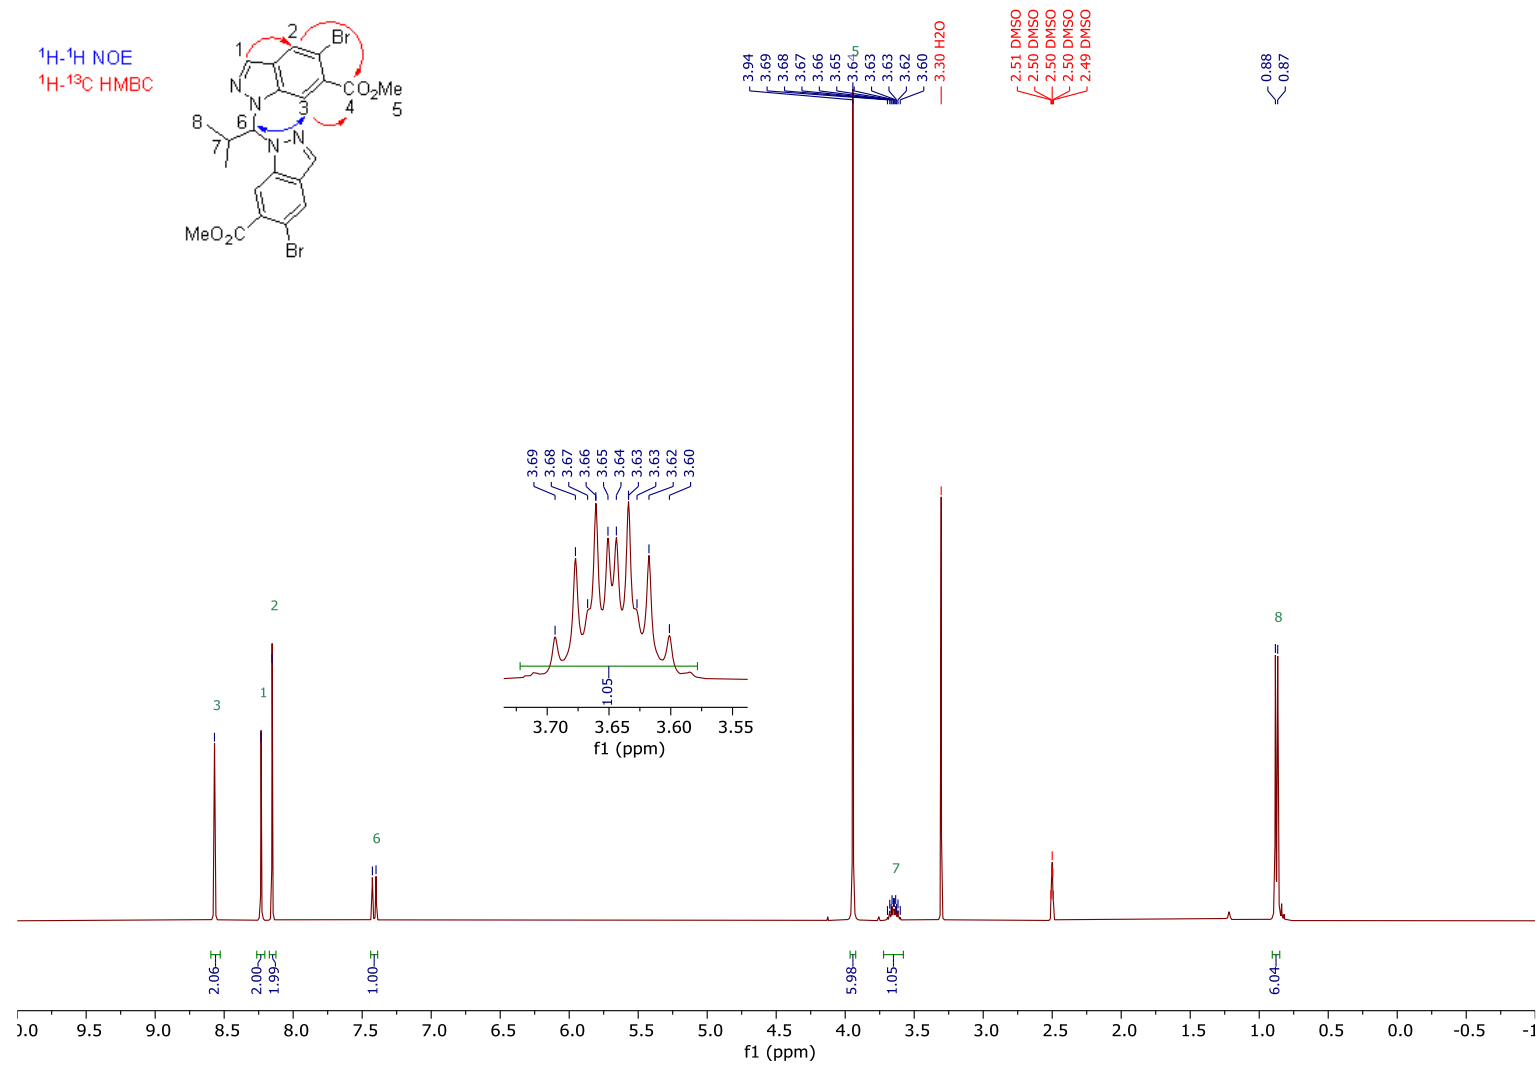

**$^{13}\text{C}$  NMR (101 MHz,  $\text{CDCl}_3$ )**

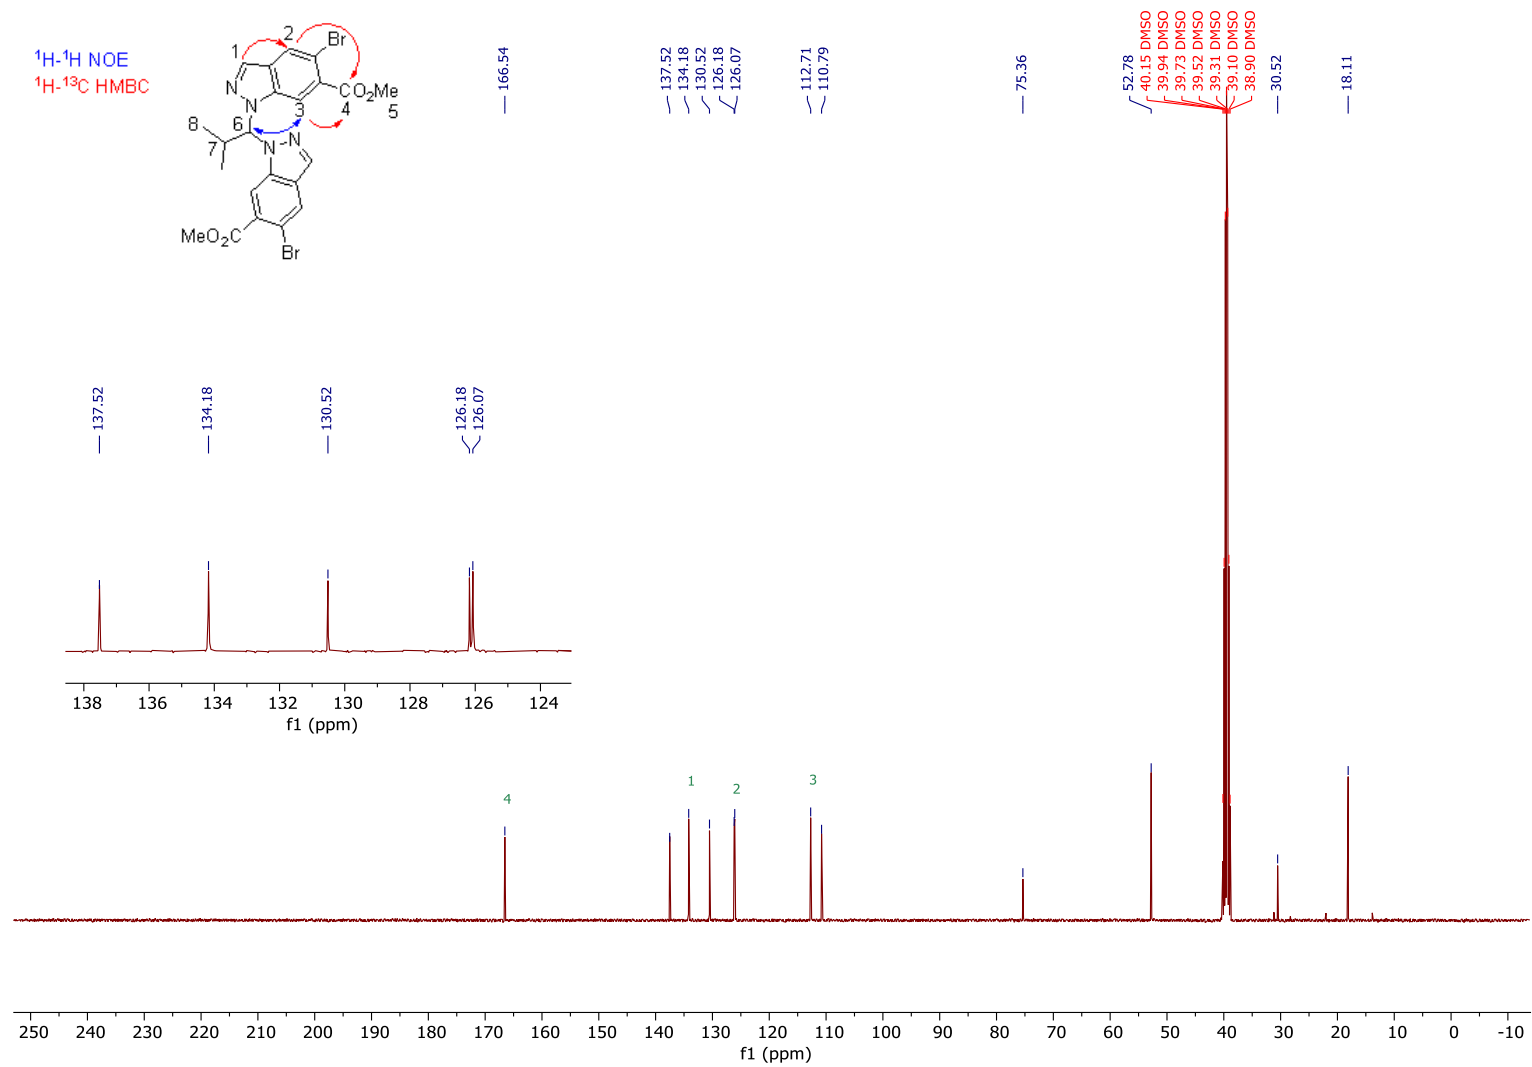

$^1\text{H}$ - $^{13}\text{C}$  HSQC ( $\text{CDCl}_3$ )

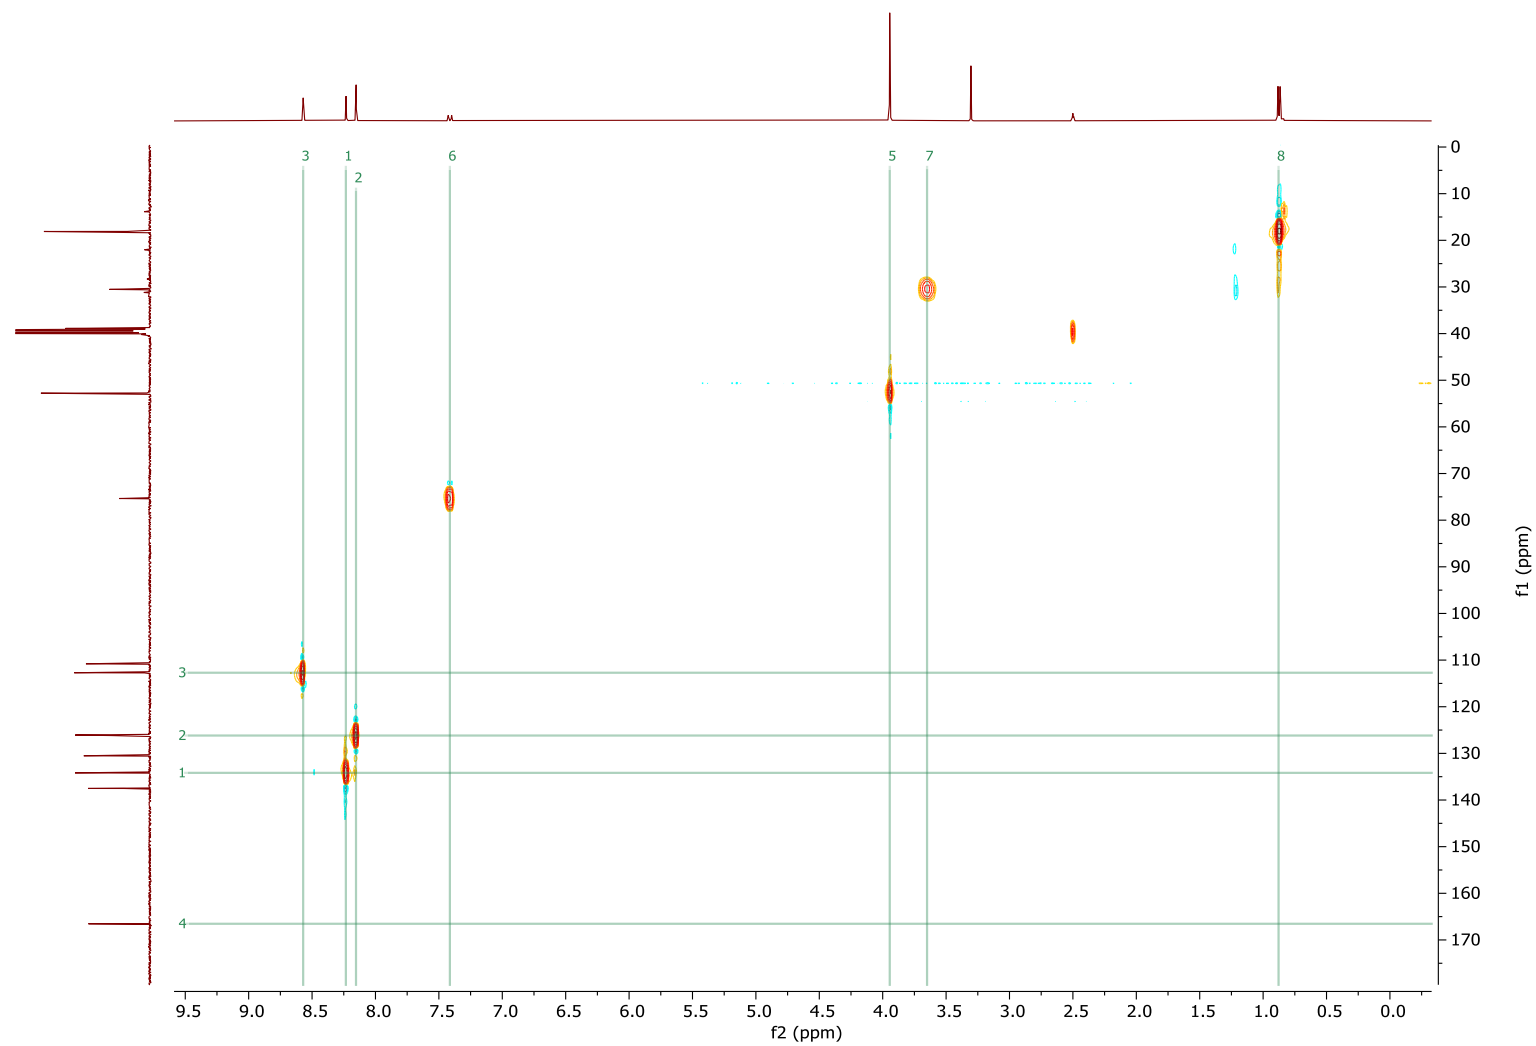

$^1\text{H}$ - $^{13}\text{C}$  HMBC ( $\text{CDCl}_3$ )

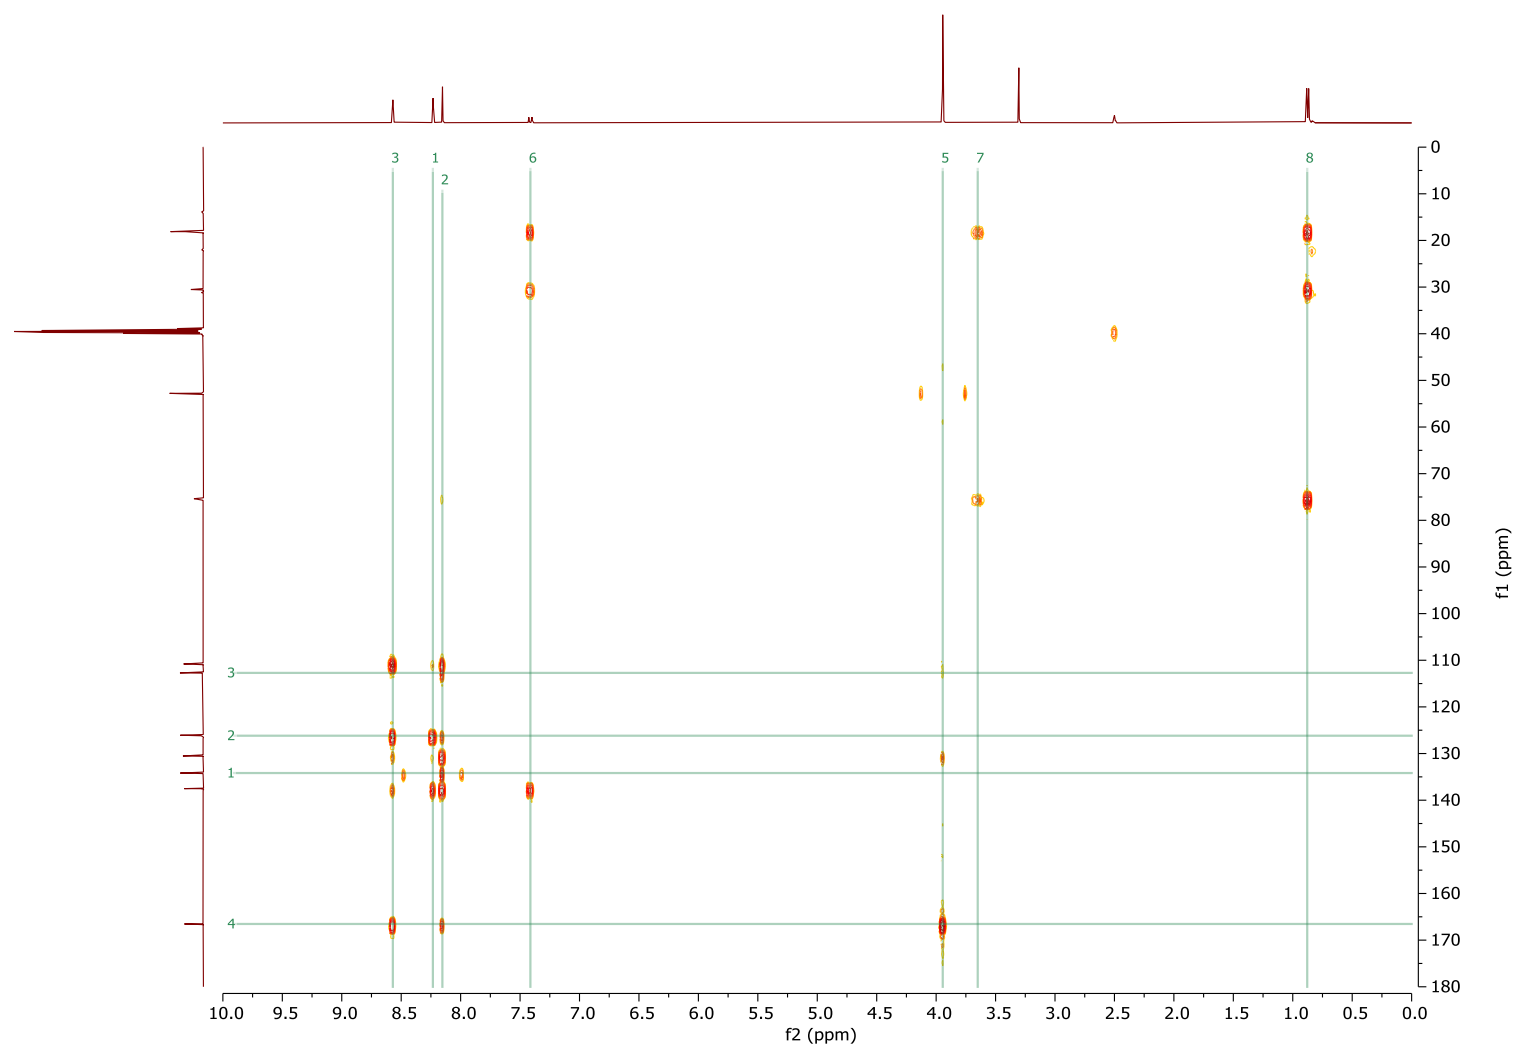

$^1\text{H}$ - $^1\text{H}$  NOESY (400 MHz,  $\text{CDCl}_3$ )

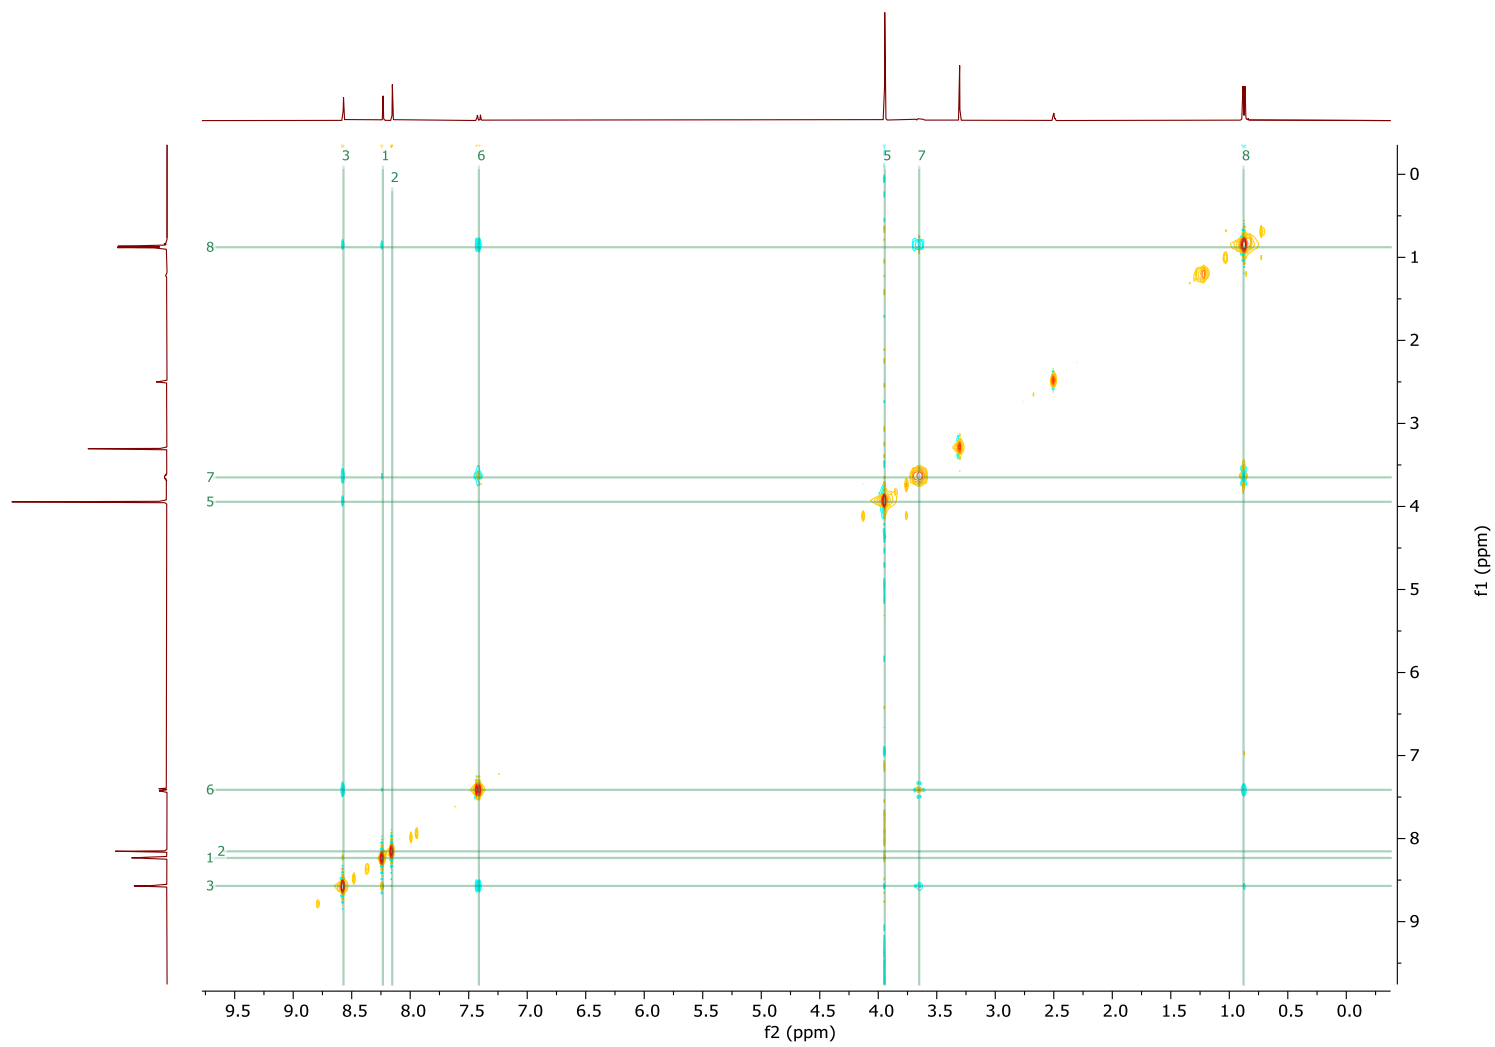

**Methyl 5-bromo-2-(2-methylprop-1-en-1-yl)-2H-indazole-6-carboxylate (6a)**

**$^1\text{H}$  NMR (400 MHz,  $\text{CDCl}_3$ )**

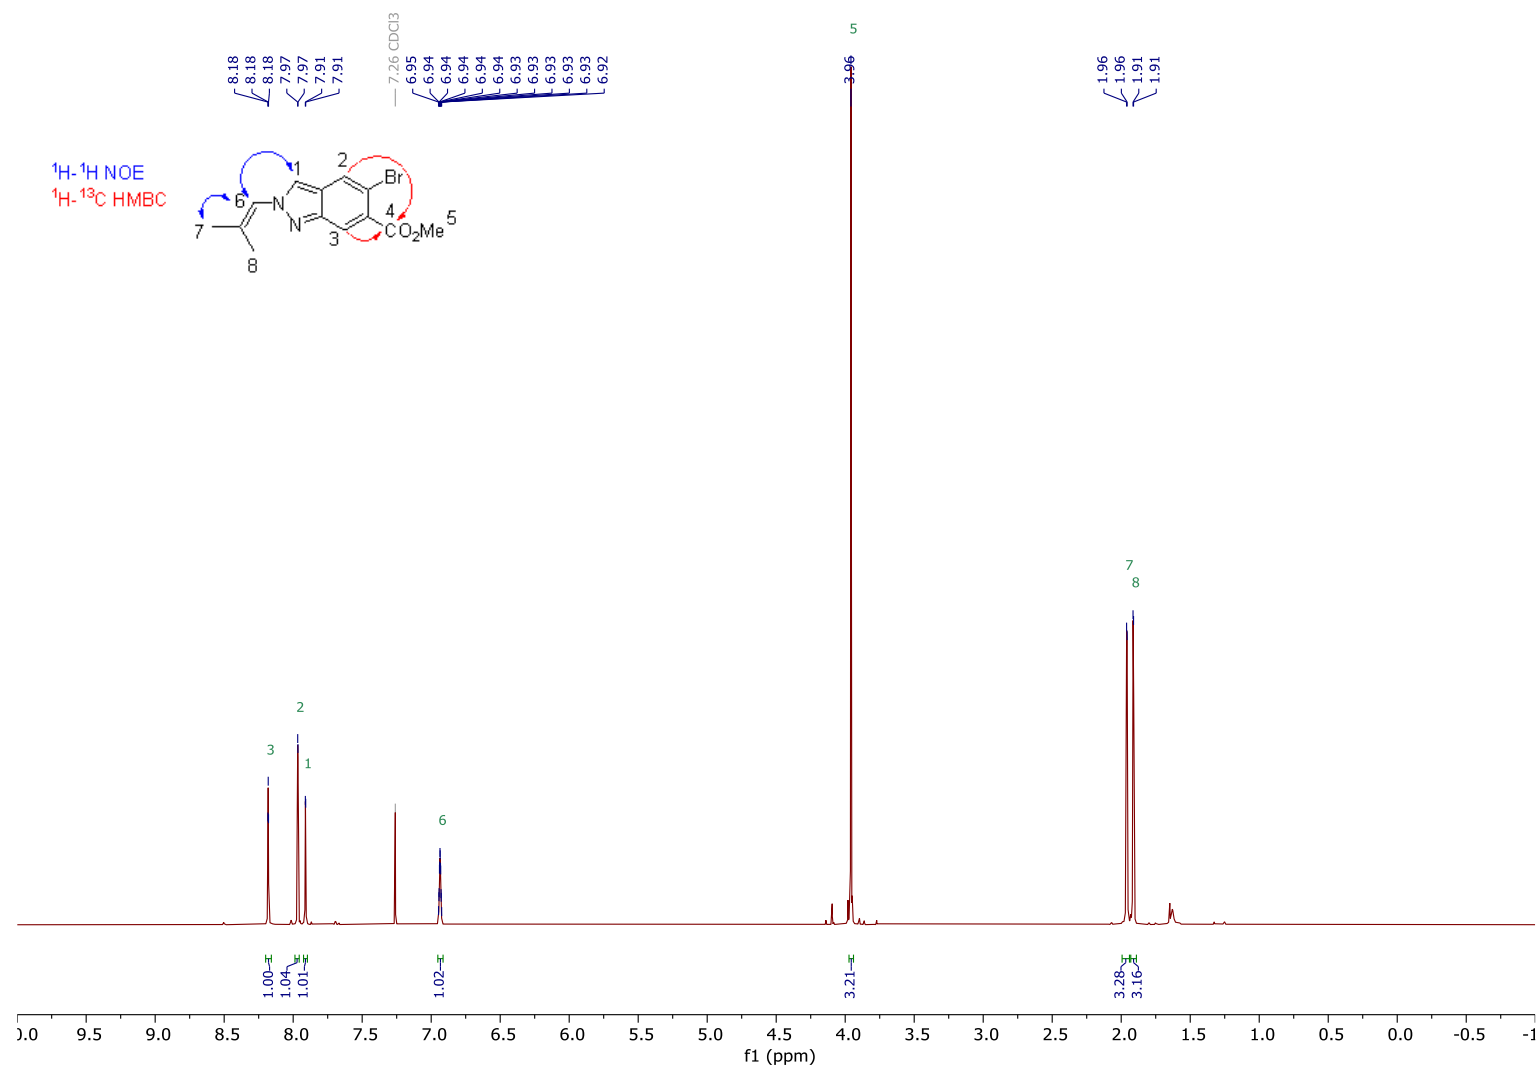

**$^{13}\text{C}$  NMR (101 MHz,  $\text{CDCl}_3$ )**

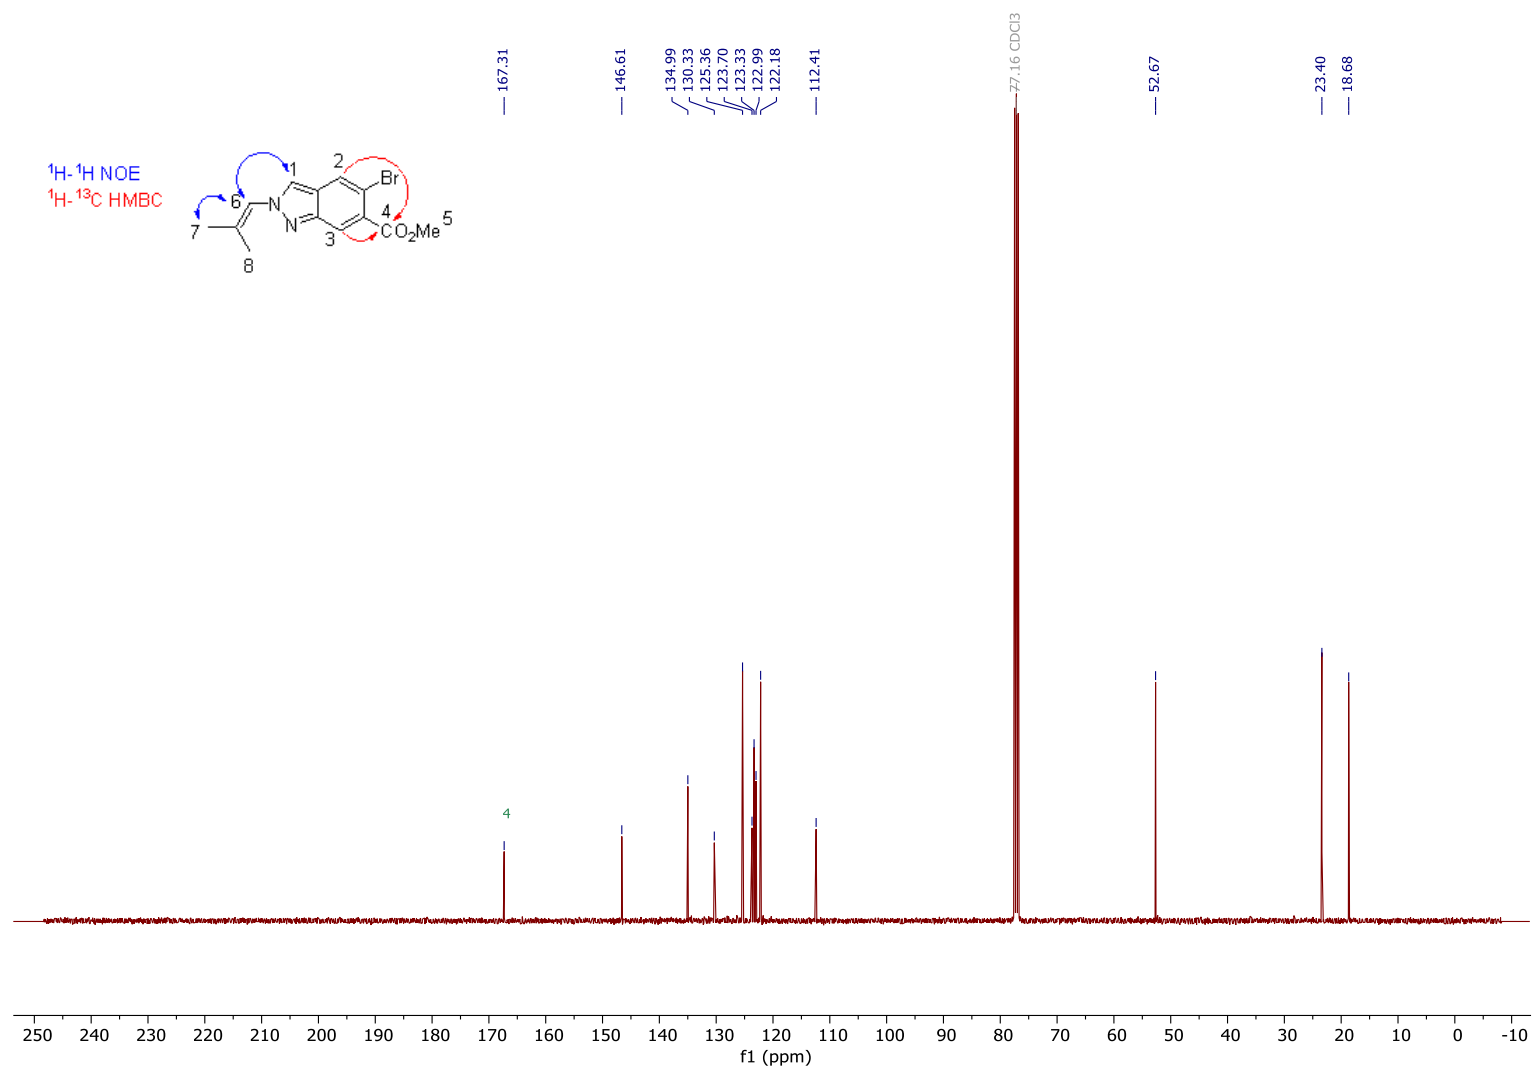

$^1\text{H}$ - $^{13}\text{C}$  HMBC ( $\text{CDCl}_3$ )

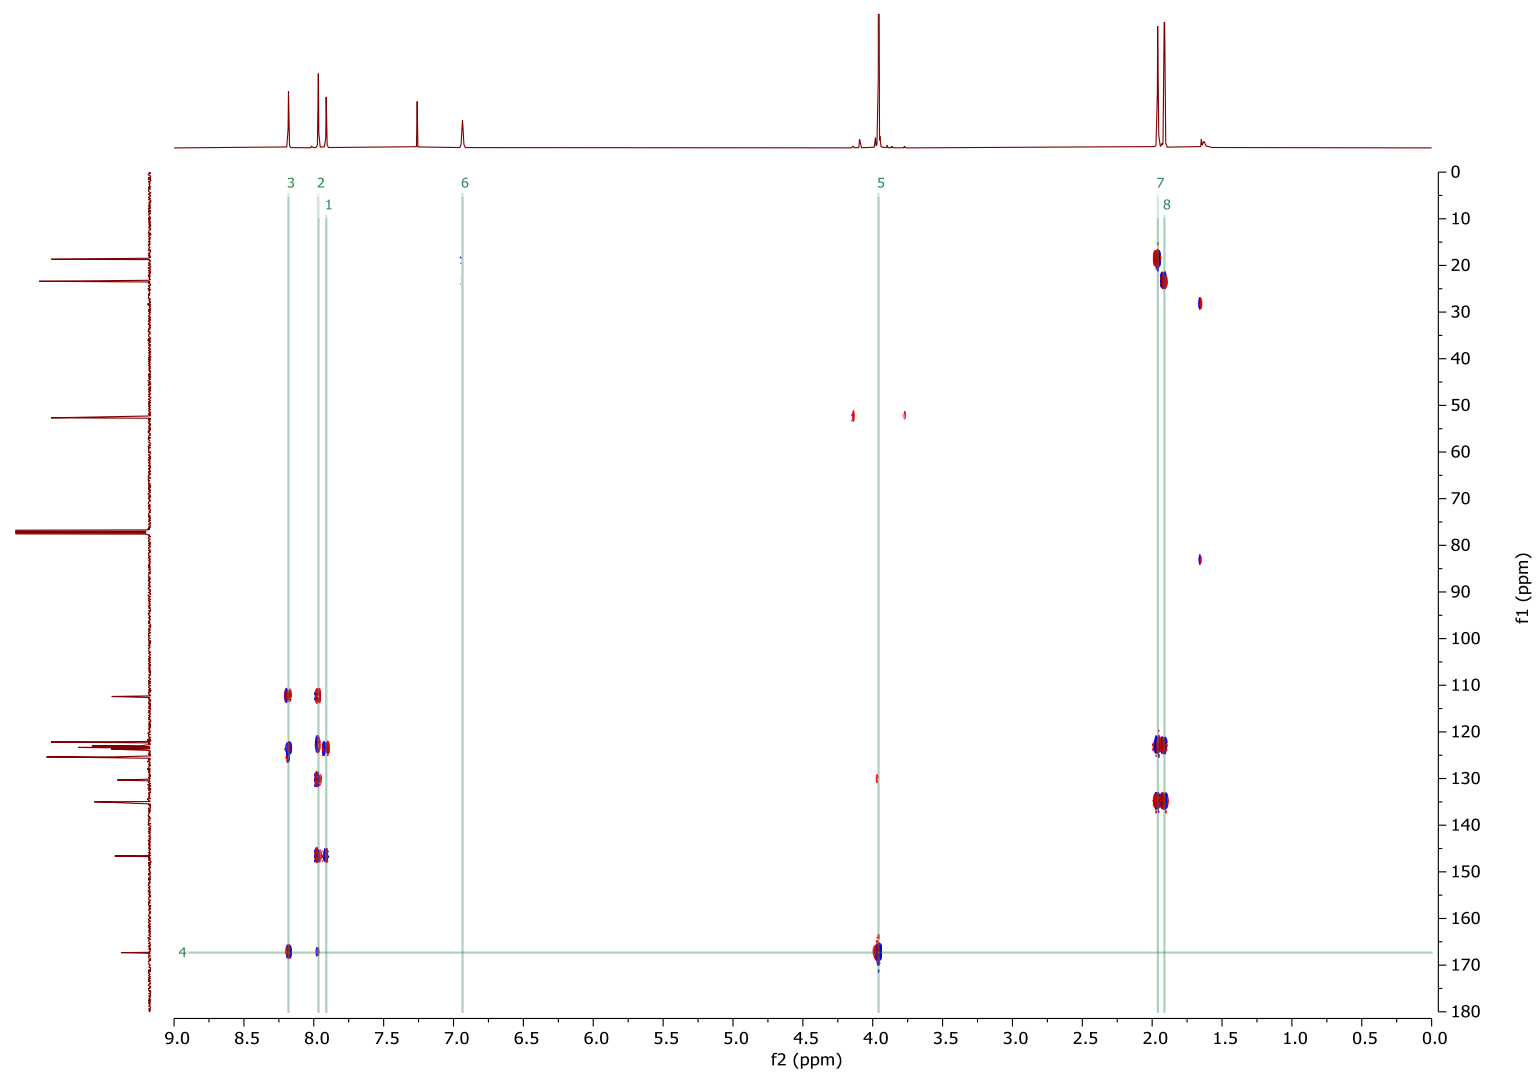

$^1\text{H}$ - $^1\text{H}$  NOESY (400 MHz,  $\text{CDCl}_3$ )

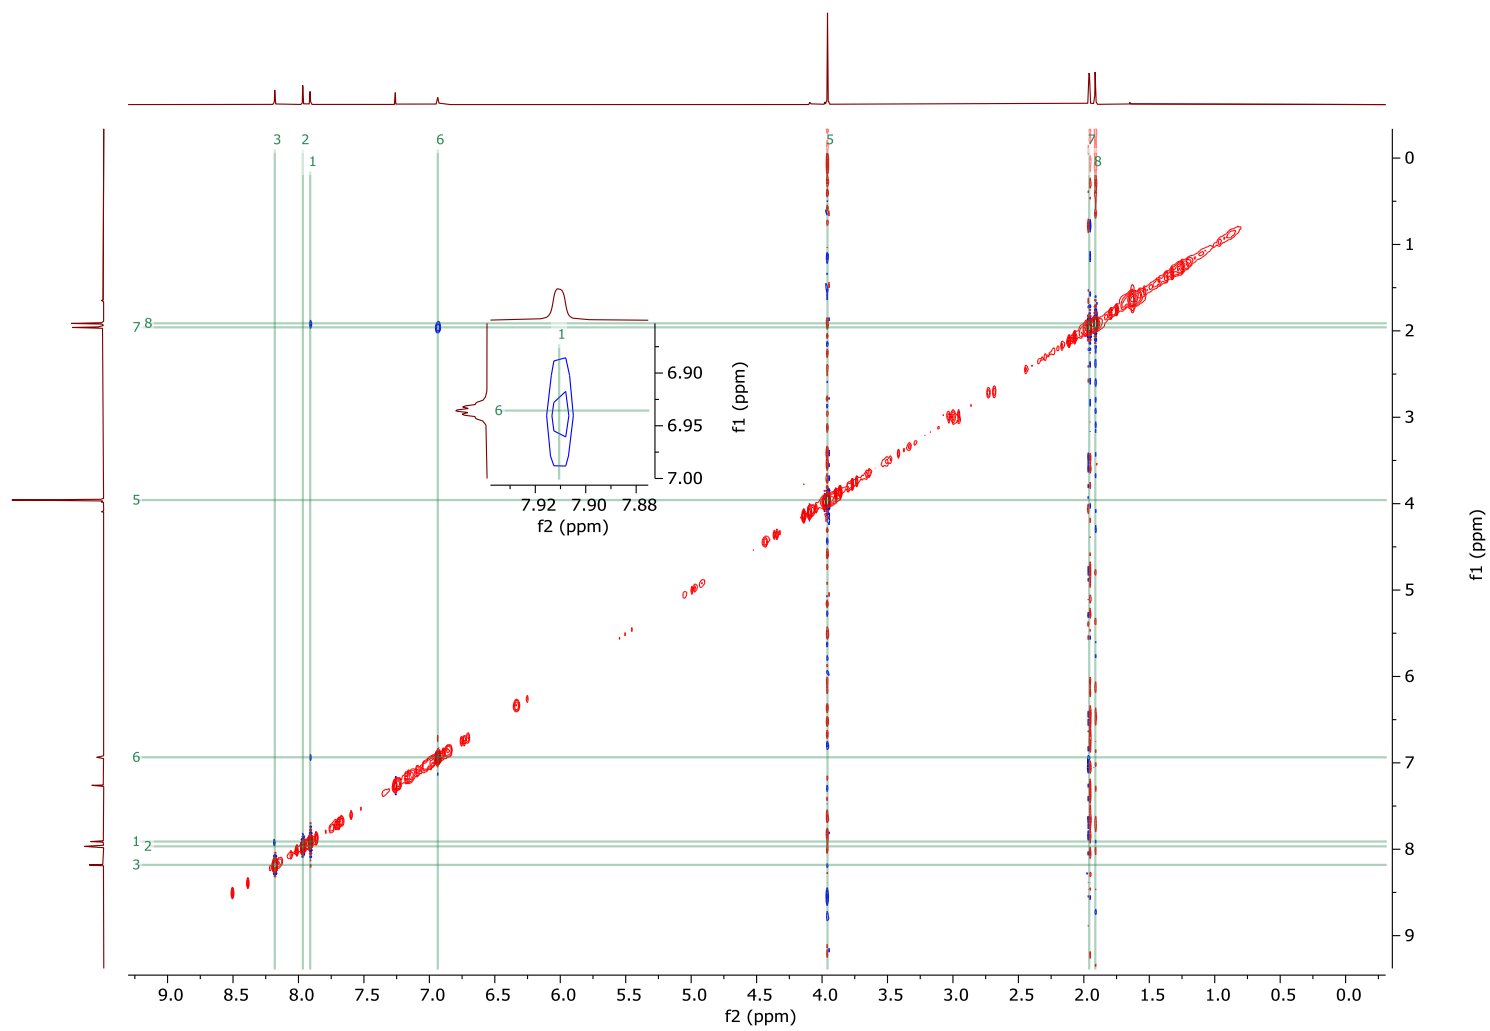

## Control reactions

### Methyl 5-bromo-1*H*-indazole-6-carboxylate

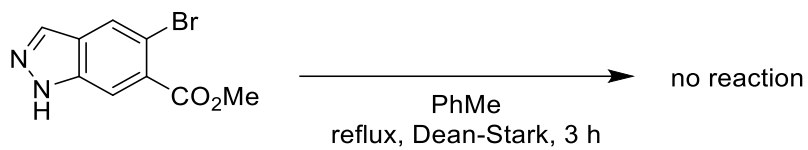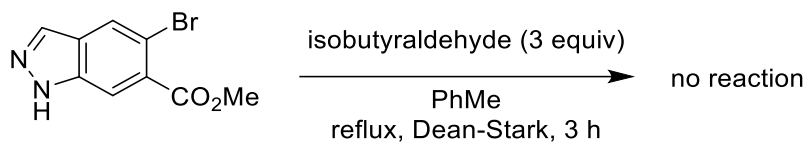

### Methyl 5-bromo-1-(2-methylprop-1-en-1-yl)-1*H*-indazole-6-carboxylate

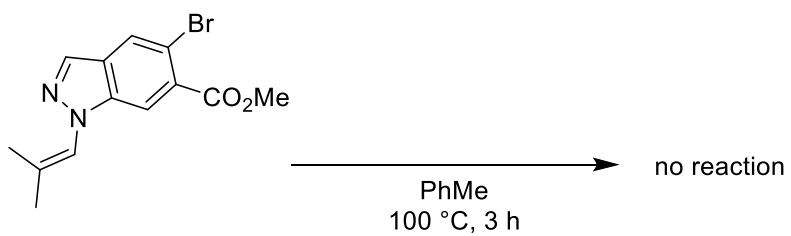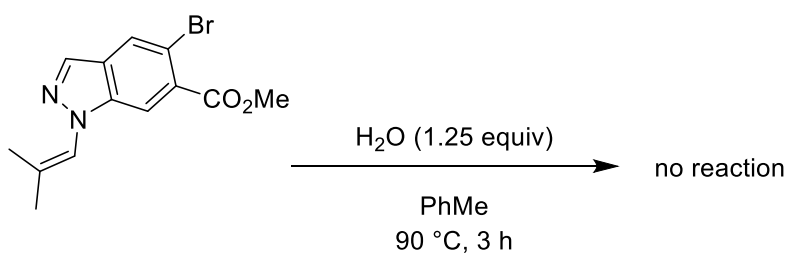

## Time course data

### Compound structure and numbering

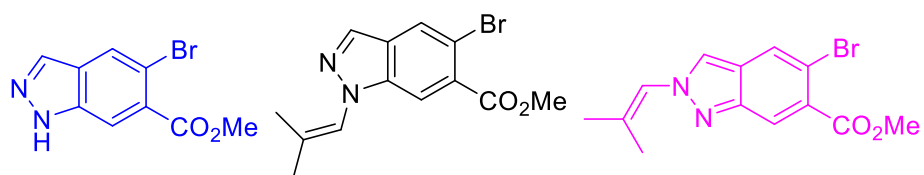

1a

4a

6a

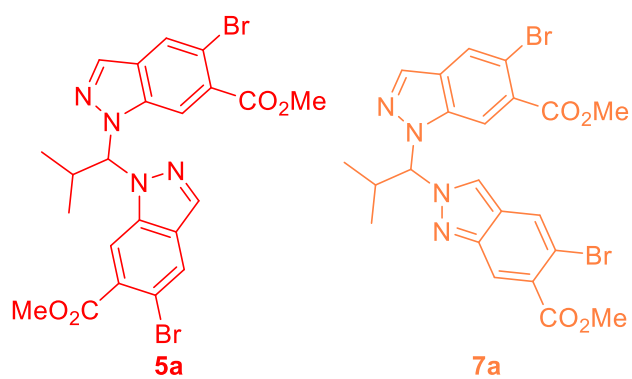

5a

7a

**'Standard conditions'**

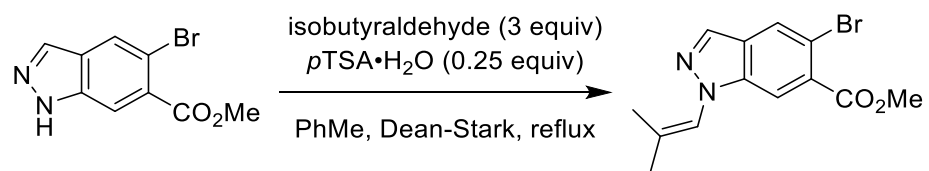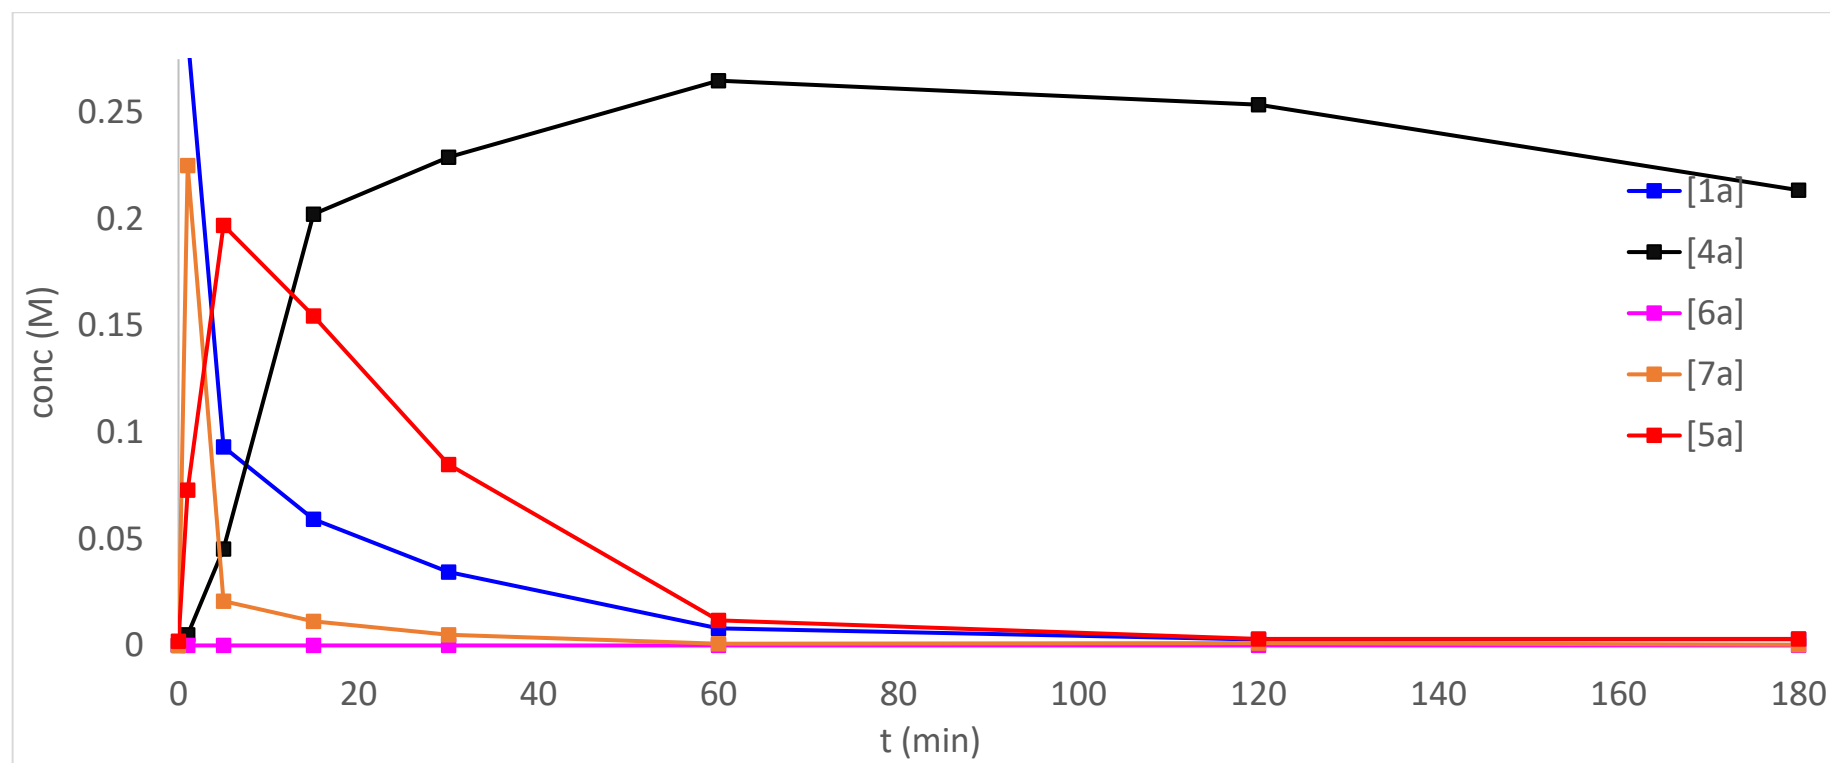

Concentration of **1a**, **4a**, **5a**, **6a**, and **7a** over time of standard reaction conditions up to 3 h.

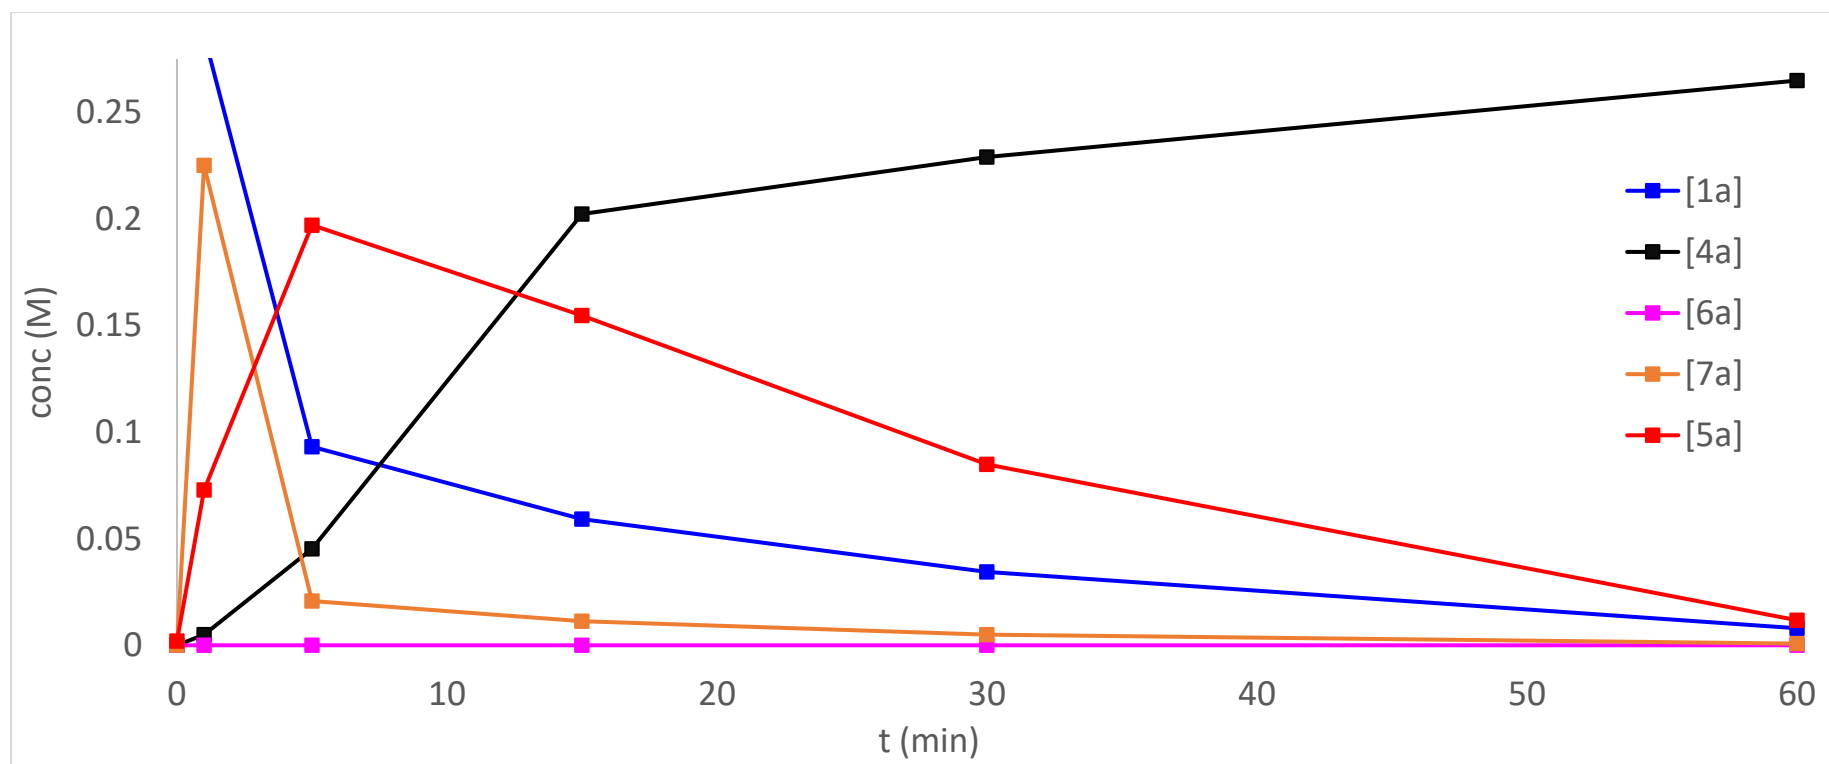

Expanded view of the concentration of **1a**, **4a**, **5a**, **6a**, and **7a** over time of standard reaction conditions up to 1 h.

0.5 equiv isobutyraldehyde, then 2.5 equiv isobutyraldehyde

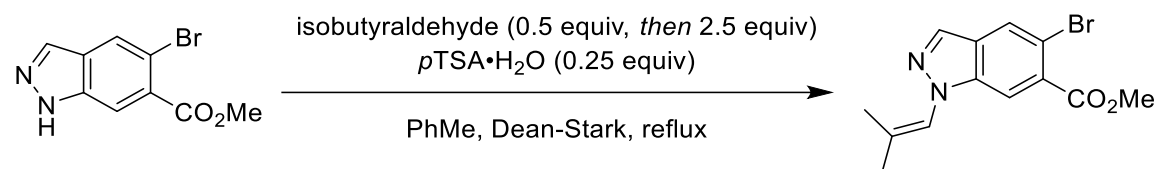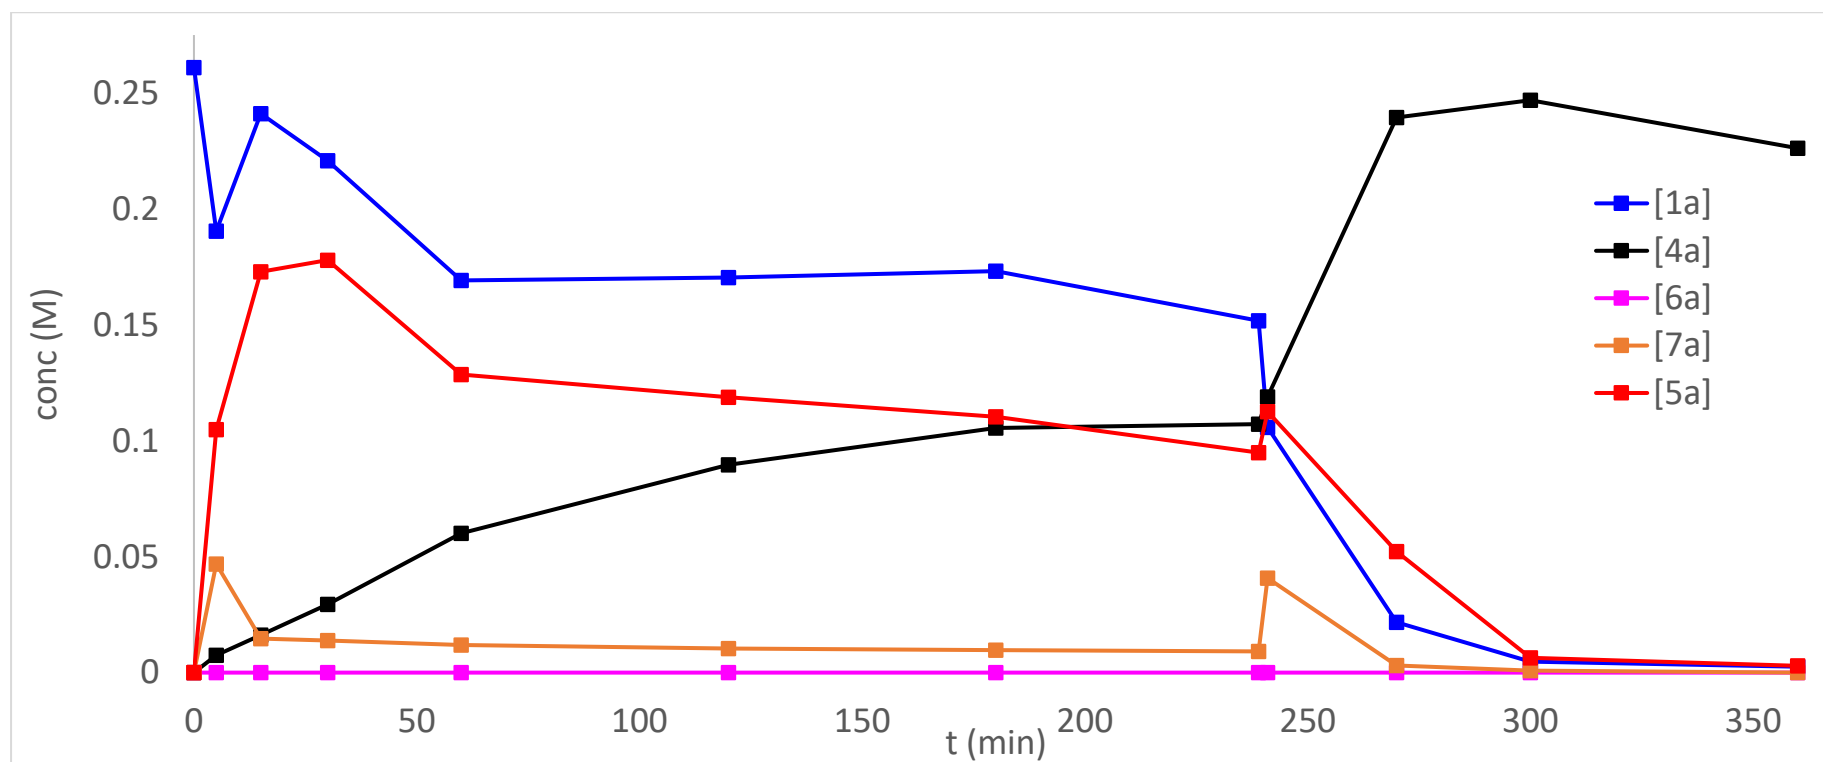

Concentration of **1a**, **4a**, **5a**, **6a**, and **7a** over time of reaction with 0.5 equiv isobutyraldehyde, then additional 2.5 equiv isobutyraldehyde at 4 h.

## Reversion of 4a

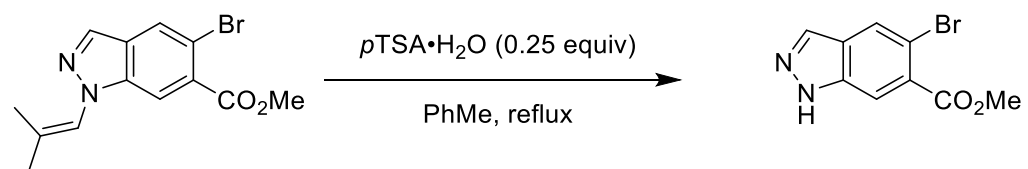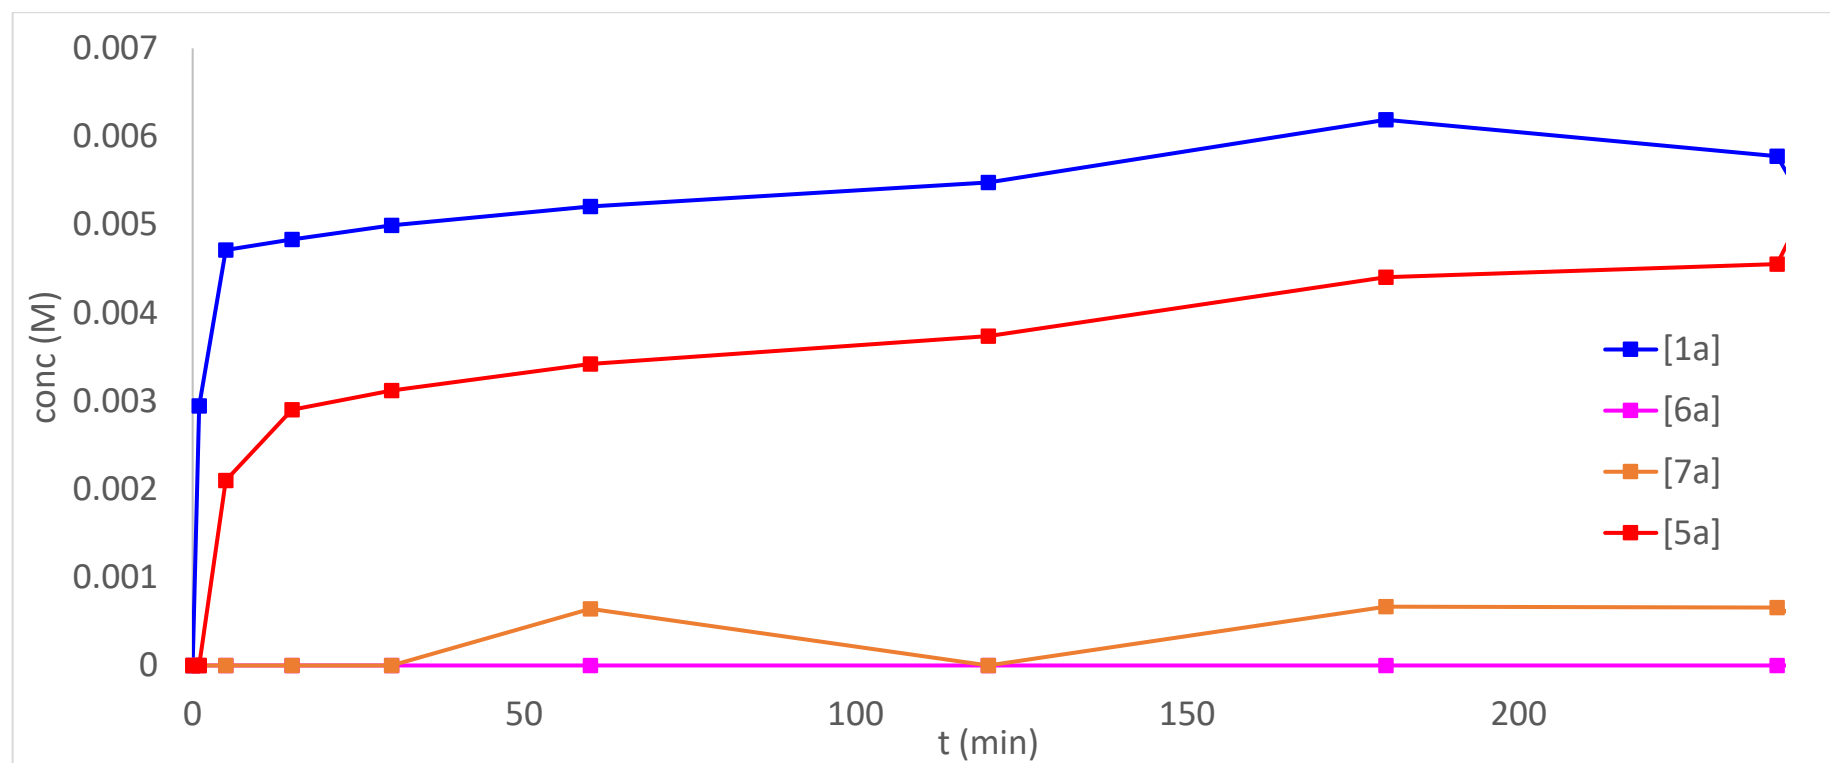

Concentration of **1a**, **5a**, **6a**, and **7a** over time from heating **4a** with *p*TSA·H<sub>2</sub>O at reflux over 4 h.

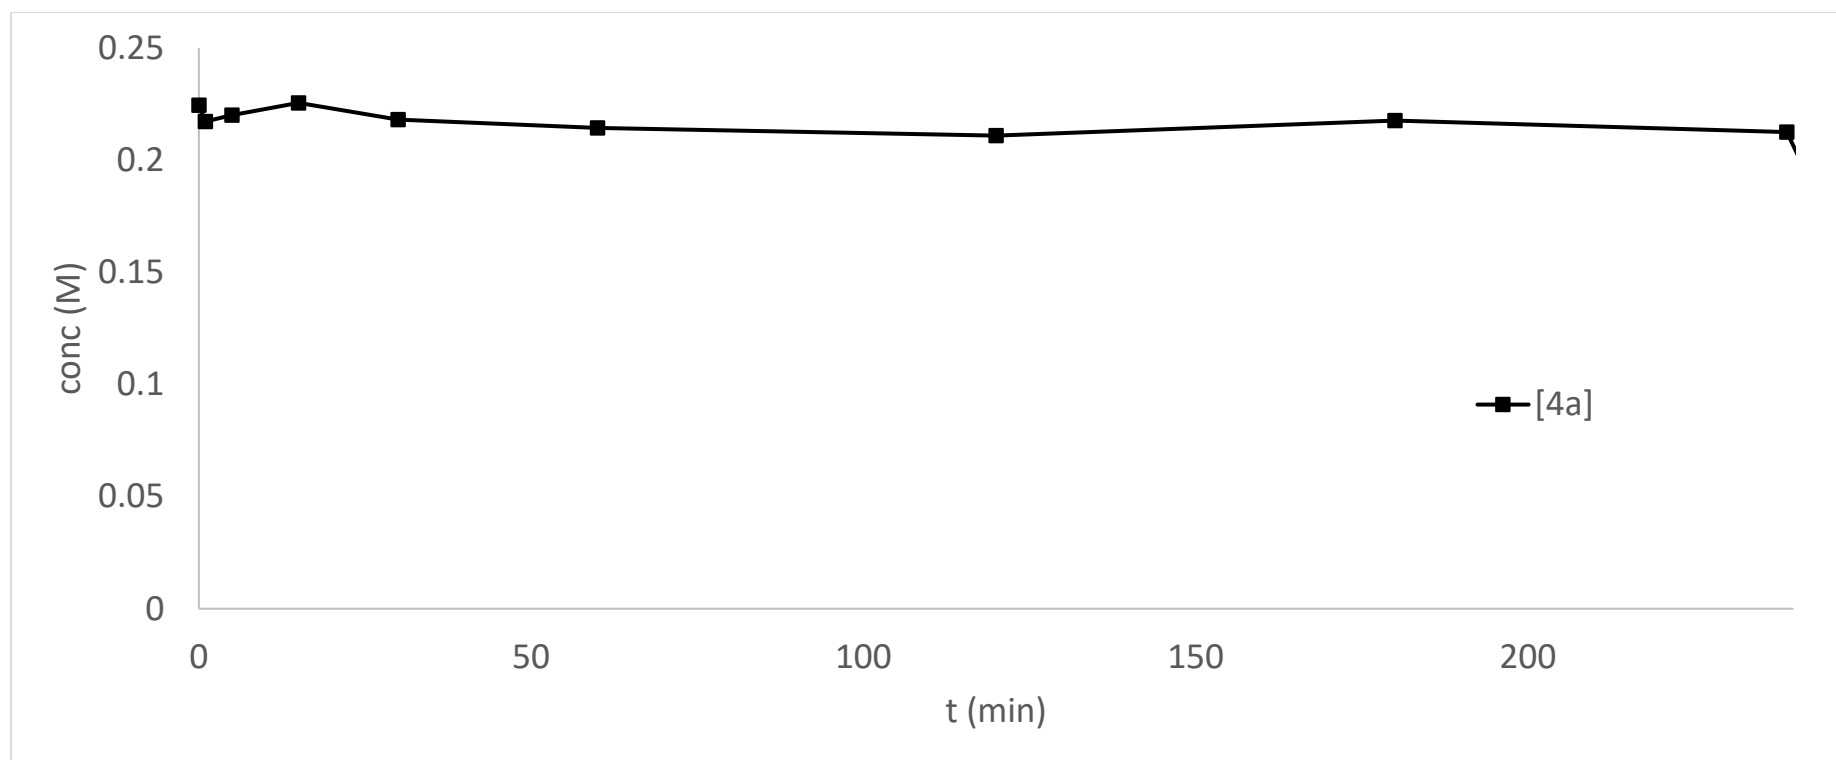

Concentration of course of **1a** from heating **4a** with  $pTSA \cdot H_2O$  at reflux over 4 h.

## Process Optimization and Scale-Up

### Crystallisation Discovery and Development

#### Methyl 5-bromo-1-isobutyl-1*H*-indazole-6-carboxylate (2a) solubility

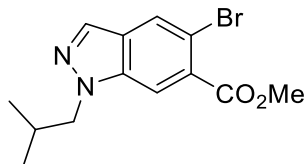

methyl 5-bromo-1-isobutyl-1*H*-indazole-6-carboxylate (40 mg, 0.13 mmol, 1.0 equiv) was dispensed into 2 mL HPLC vial vials equipped with a stirrer bar. Solvent (400  $\mu$ L) was added, and the vials were stirred at 25 °C overnight.

| entry | solvent                              | visual   | solubility (mg/mL) |
|-------|--------------------------------------|----------|--------------------|
| 1     | MeOH                                 | solution | >90                |
| 2     | IPA                                  | solution | >90                |
| 3     | <sup>t</sup> AmylOH                  | solution | >90                |
| 4     | Acetone                              | solution | >90                |
| 5     | MIBK                                 | solution | >90                |
| 6     | EtOAc                                | solution | >90                |
| 7     | <sup>i</sup> BuOAc                   | solution | >90                |
| 8     | MTBE                                 | solution | >90                |
| 9     | <sup>t</sup> AmylOMe                 | solution | >90                |
| 10    | 1,2-dimethoxyethane                  | solution | >90                |
| 11    | THF                                  | solution | >90                |
| 12    | 2-MeTHF                              | solution | >90                |
| 13    | Anisole                              | solution | >90                |
| 14    | MeCN                                 | solution | >90                |
| 15    | Butyronitrile                        | solution | >90                |
| 16    | PhMe                                 | solution | >90                |
| 17    | PhMe and MeOH (70:30)                | solution | >90                |
| 18    | MeCN and H <sub>2</sub> O (80:20)    | solution | >90                |
| 19    | THF and H <sub>2</sub> O (80:20)     | solution | >90                |
| 20    | Acetone and H <sub>2</sub> O (80:20) | solution | >90                |
| 21    | IPA and H <sub>2</sub> O (80:20)     | solution | >90                |
| 22    | 2-MeTHF and H <sub>2</sub> O (80:20) | biphasic | n/a                |

### Methyl 5-bromo-1-isobutyl-1*H*-indazole-6-carboxylate HTE salt screen

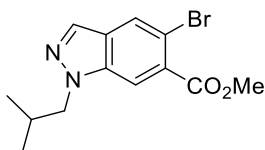

A 96-well Paradox plate was prepared with 0.8 mL glass shell vials equipped with a super tumble stir disc using a stir disc plate dispenser. Solid acids (0.032 mmol, 1.0 equiv) were dispensed. Solutions of 50 mg mL<sup>-1</sup> methyl 5-bromo-1-isobutyl-1*H*-indazole-6-carboxylate in MeCN, IPA, EtOAc, and PhMe (200  $\mu$ L, 0.032 mmol, 1.0 equiv) were dispensed. Liquid acids (0.032 mmol, 1.0 equiv) were dispensed. The vials were stirred at 25 °C and 500 rpm overnight.

### Solvent Selection

| entry | reagent | class    | selected descriptors                     |            |            |                |                        |
|-------|---------|----------|------------------------------------------|------------|------------|----------------|------------------------|
|       |         |          | Hansen solubility parameter <sup>a</sup> |            |            | Polarity $P^b$ | b.p. (°C) <sup>c</sup> |
|       |         |          | $\delta_d$                               | $\delta_p$ | $\delta_h$ |                |                        |
| 1     | MeCN    | nitrile  | 15.3                                     | 18.0       | 16.1       | 5.8            | 82                     |
| 2     | IPA     | alcohol  | 15.8                                     | 6.1        | 16.4       | 3.9            | 82                     |
| 3     | EtOAc   | ester    | 15.8                                     | 5.3        | 7.2        | 4.4            | 77                     |
| 4     | PhMe    | aromatic | 18.0                                     | 1.4        | 2.0        | 2.4            | 110                    |

<sup>a</sup>ref <sup>10</sup>. <sup>b</sup>ref <sup>11</sup>. <sup>c</sup>Sigma-Aldrich.

## Acid selection

| entry | acid                                  | selected descriptors |                      |
|-------|---------------------------------------|----------------------|----------------------|
|       |                                       | form (rt)            | type                 |
| 1     | (-)-Camphorsulfonic acid              | Solid                | sulfonic acid        |
| 2     | Citric acid                           | Solid                | tris-carboxylic acid |
| 3     | Fumaric acid                          | Solid                | bis-carboxylic acid  |
| 4     | Maleic acid                           | Solid                | bis-carboxylic acid  |
| 5     | Malonic acid                          | Solid                | bis-carboxylic acid  |
| 6     | Methanesulfonic acid (5 M in IPA)     | Solution             | sulfonic acid        |
| 7     | 1,5-Naphthalenedisulfonic acid        | Solid                | bis-sulfonic acid    |
| 8     | D-(-)-Tartaric acid                   | Solid                | bis-carboxylic acid  |
| 9     | HCl (5 M in IPA)                      | Solution             | mineral acid         |
| 10    | N-Acetyl-L-leucine                    | Solid                | carboxylic acid      |
| 11    | pTSA·H <sub>2</sub> O                 | Solid                | sulfonic acid        |
| 12    | Phosphoric acid (5 M in IPA)          | Solution             | mineral acid         |
| 13    | Acetic acid (5 M in IPA)              | Solution             | carboxylic acid      |
| 14    | (-)-O,O'-Di-p-toluoyl-L-tartaric acid | Solid                | bis-carboxylic acid  |
| 15    | L-(-)-Malic acid                      | Solid                | bis-carboxylic acid  |
| 16    | none                                  | n/a                  | n/a                  |
| 17    | Salicylic acid                        | Solid                | carboxylic acid      |
| 18    | Sulfuric acid (5 M in IPA)            | Solution             | mineral acid         |
| 19    | Benzoic acid                          | Solid                | carboxylic acid      |
| 20    | Formic acid (5 M in IPA)              | Solution             | carboxylic acid      |
| 21    | L-(+)-Mandelic acid                   | Solid                | carboxylic acid      |
| 22    | Oxalic acid                           | Solid                | bis-carboxylic acid  |
| 23    | Succinic acid                         | Solid                | bis-carboxylic acid  |
| 24    | Trifluoroacetic acid (5 M in IPA)     | Solution             | carboxylic acid      |

## Salt screen results

| Acetonitrile      |                     |                  |                    |                   |                   | IPA               |                     |                  |                    |                   |                   |
|-------------------|---------------------|------------------|--------------------|-------------------|-------------------|-------------------|---------------------|------------------|--------------------|-------------------|-------------------|
| (-) Camphorsul... | Citric acid         | Fumaric acid     | Maleic acid        | Malonic acid      | Methane Sulfo...  | (-) Camphorsul... | Citric acid         | Fumaric acid     | Maleic acid        | Malonic acid      | Methane Sulfo...  |
| hazy              | hazy                | slurry           | hazy               | hazy              | hazy              | hazy              | hazy                | hazy             | hazy               | hazy              | hazy              |
| 1,5-Naphthale...  | D-Tartaric acid     | HCl (5M in IPA)  | N-acetyl-L-leuc... | p-toulenesulfo... | Phosphoric Ac...  | 1,5-Naphthale...  | D-Tartaric acid     | HCl (5M in IPA)  | N-acetyl-L-leuc... | p-toulenesulfo... | Phosphoric Ac...  |
| slurry            | hazy                | hazy             | slurry             | slurry            | clear             | hazy              | hazy                | hazy             | hazy               | hazy              | hazy              |
| Acetic acid (5... | Di-p-toluoyl-L-t... | L-(-)-Malic acid | none               | Salicylic acid    | Sulphuric acid... | Acetic acid (5... | Di-p-toluoyl-L-t... | L-(-)-Malic acid | none               | Salicylic acid    | Sulphuric acid... |
| clear             | hazy                | hazy             | hazy               | hazy              | slurry            | hazy              | hazy                | hazy             | hazy               | hazy              | hazy              |
| Benzoic acid      | Formic acid (5...   | L-Mandelic acid  | Oxalic acid        | Succinic acid     | TFA (5M in IPA)   | Benzoic acid      | Formic acid (5...   | L-Mandelic acid  | Oxalic acid        | Succinic acid     | TFA (5M in IPA)   |
| hazy              | clear               | hazy             | hazy               | hazy              | clear             | hazy              | hazy                | hazy             | hazy               | hazy              | hazy              |
| Ethyl Acetate     |                     |                  |                    |                   |                   | Toluene           |                     |                  |                    |                   |                   |
| (-) Camphorsul... | Citric acid         | Fumaric acid     | Maleic acid        | Malonic acid      | Methane Sulfo...  | (-) Camphorsul... | Citric acid         | Fumaric acid     | Maleic acid        | Malonic acid      | Methane Sulfo...  |
| hazy              | slurry              | solid/gum        | hazy               | hazy              | hazy              | hazy              | hazy                | hazy             | hazy               | hazy              | hazy              |
| 1,5-Naphthale...  | D-Tartaric acid     | HCl (5M in IPA)  | N-acetyl-L-leuc... | p-toulenesulfo... | Phosphoric Ac...  | 1,5-Naphthale...  | D-Tartaric acid     | HCl (5M in IPA)  | N-acetyl-L-leuc... | p-toulenesulfo... | Phosphoric Ac...  |
| slurry            | hazy                | hazy             | hazy               | solid/gum         | hazy              | solid/gum         | hazy                | hazy             | hazy               | slurry            | hazy              |
| Acetic acid (5... | Di-p-toluoyl-L-t... | L-(-)-Malic acid | none               | Salicylic acid    | Sulphuric acid... | Acetic acid (5... | Di-p-toluoyl-L-t... | L-(-)-Malic acid | none               | Salicylic acid    | Sulphuric acid... |
| hazy              | hazy                | hazy             | hazy               | hazy              | slurry            | hazy              | solid/gum           | hazy             | hazy               | hazy              | solid/gum         |
| Benzoic acid      | Formic acid (5...   | L-Mandelic acid  | Oxalic acid        | Succinic acid     | TFA (5M in IPA)   | Benzoic acid      | Formic acid (5...   | L-Mandelic acid  | Oxalic acid        | Succinic acid     | TFA (5M in IPA)   |
| hazy              | hazy                | hazy             | hazy               | hazy              | hazy              | hazy              | hazy                | hazy             | hazy               | hazy              | hazy              |

### Methyl 5-bromo-1-isobutyl-1*H*-indazole-6-carboxylate·*p*TSA initial synthesis (unoptimized)

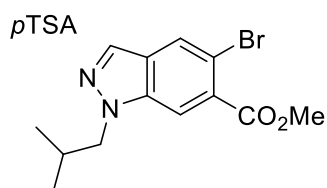

Isobutyraldehyde (5.37 mL, 58.81 mmol, 3.0 equiv) was added to methyl 5-bromo-1*H*-indazole-6-carboxylate (5.0 g, 19.60 mmol, 1.0 equiv), *p*TSA·H<sub>2</sub>O (0.93 g, 4.90 mmol, 0.25 equiv), and PhMe (75 mL) in a 100 mL EasyMax reactor vessel. A Dean-Stark condenser was equipped and the reaction mixture was heated to a vigorous reflux (jacket temperature = 140 °C) for 3 h. Et<sub>3</sub>N (0.68 mL, 4.90 mmol, 0.25 equiv) was added, then the reaction mixture was cooled to rt. The reaction mixture was washed with H<sub>2</sub>O (20 mL), 1 M HCl (20 mL) and sat. brine (20 mL). The organic layer was concentrated to *ca.* 50 mL by distillation at atmospheric pressure to afford a solution of crude enamine in PhMe.

5% Pt/C (0.99 g, 0.25 mmol, 0.013 equiv) was added to the crude enamine solution, and the reaction mixture was stirred under an atmosphere of H<sub>2</sub> at 40 psi and 30 °C for 24 hours. The resulting reaction mixture was filtered through arboceel, washed with PhMe, and concentrated to afford crude product.

Crude product was dissolved in PhMe (40 mL) and heated to 50 °C. A solution of *p*TSA·H<sub>2</sub>O (3.13 g, 16.46 mmol, 0.84 equiv) in IPA (3.1 mL) was added slowly. The reaction mixture was cooled to 40 °C, then cooled to 5 °C over 5 h, then held at 5 °C overnight. A slurry was observed. The product was collected by filtration, washed with PhMe (25 mL×2), and dried to afford methyl 5-bromo-1-isobutyl-1*H*-indazole-6-carboxylate·*p*TSA (2.33 g, 4.82 mmol, 25% yield (over 2 steps)) as an off-white solid.

**mp** 137-138 °C; **v**<sub>max</sub> (neat) /cm<sup>-1</sup> 2955, 1742, 1460, 1242; **<sup>1</sup>H NMR** (400 MHz, MeOD) δ 8.08 (d, *J* = 0.5 Hz, 1H), 8.05 (d, *J* = 1.0 Hz, 1H), 8.00 (dd, *J* = 1.0, 0.5 Hz, 1H), 7.75 – 7.67 (m, 2H), 7.28 – 7.20 (m, 2H), 4.24 (d, *J* = 7.5 Hz, 2H), 3.95 (s, 3H), 2.37 (s, 3H), 2.36 – 2.22 (m, 1H), 0.90 (d, *J* = 6.5 Hz, 6H); **<sup>13</sup>C NMR** (101 MHz, MeOD) δ 168.8, 143.0, 142.0, 139.3, 133.3, 132.0, 129.9, 127.4, 127.2, 127.0, 113.5, 111.8, 57.2, 53.2, 30.8, 21.3, 20.3; **HRMS** (ESI<sup>+</sup>) calc. for C<sub>13</sub>H<sub>16</sub><sup>79</sup>BrN<sub>2</sub>O<sub>2</sub> ([M-C<sub>7</sub>H<sub>7</sub>O<sub>3</sub>S]<sup>+</sup>) 311.0390; found 311.0382.

**NB:** Repeats achieved up to 53% yield.

### Methyl 5-bromo-1-isobutyl-1*H*-indazole-6-carboxylate·*p*TSA solubility

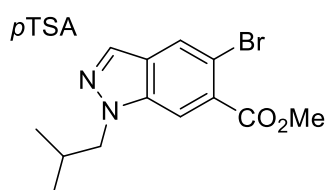

methyl 5-bromo-1-isobutyl-1*H*-indazole-6-carboxylate·*p*TSA (50 mg, 0.10 mmol, 1.0 equiv) was dispensed into 2 mL HPLC vial vials equipped with a stirrer bar. Solvent (500  $\mu$ L) was added, and the vials were stirred at 25  $^{\circ}$ C overnight sampled, then 50  $^{\circ}$ C overnight and sampled again.

When sampled, the vials were centrifuged rpm for 30 min. Supernatant (30  $\mu$ L) was removed and dissolved in MeCN (1 mL) for LCMS. Solubility was determined by LCMS with methyl 5-bromo-1-isobutyl-1*H*-indazole-6-carboxylate·*p*TSA external standard. External standard prepared by diluting methyl 5-bromo-1-isobutyl-1*H*-indazole-6-carboxylate·*p*TSA (100 mg, 0.20 mmol) in MeOH (1 mL), then diluting 30  $\mu$ L of this solution in MeCN (1 mL).

| entry | solvent                           | visual at 25 °C       | solubility at 25 °C<br>(g /L) | visual at 50 °C              | solubility at 50 °C<br>(g /L) | difference in solubility<br>(g /L) |
|-------|-----------------------------------|-----------------------|-------------------------------|------------------------------|-------------------------------|------------------------------------|
| 1     | MeCN                              | slurry                | 31.6                          | solution, crust on vial      | 68.0                          | 36.4                               |
| 2     | PhMe                              | slurry                | 0.0                           | slurry                       | 19.4                          | 19.4                               |
| 3     | PhMe and MeCN (50:50)             | slurry                | 50.6                          | solution, crust on vial      | 86.4                          | 35.8                               |
| 4     | PhMe and MeCN (25:75)             | slurry                | 45.3                          | solution, crust on vial      | 86.4                          | 41.1                               |
| 5     | PhMe and MeCN (75:25)             | slurry                | 38.4                          | solution, crust on vial      | 83.9                          | 45.5                               |
| 6     | Heptane and MeCN (25:75)          | slurry                | 30.6                          | solution, crust on vial      | 89.6                          | 59                                 |
| 7     | MeTHF                             | hazy solution         | >101.3                        | solution                     | >81.1                         | n/a                                |
| 8     | Acetone                           | solution              | >87.4                         | dark brown solution          | >98.7                         | n/a                                |
| 9     | MEK                               | slurry                | 76.5                          | light brown solution         | >90.7                         | n/a                                |
| 10    | MTBE                              | slurry                | 20.1                          | hazy solution, crust on vial | 58.5                          | 38.4                               |
| 11    | EtOAc                             | slurry                | 37.9                          | solution, crust on vial      | 68.4                          | 30.5                               |
| 12    | MIBK                              | slurry                | 38.5                          | thin slurry                  | 75.7                          | 37.2                               |
| 13    | THF                               | solution              | >77.2                         | solution                     | >82.7                         | n/a                                |
| 14    | Anisole                           | slurry                | 19.2                          | thin slurry                  | 48.8                          | 29.6                               |
| 15    | Butyronitrile                     | slurry                | 37.6                          | solution, crust on vial      | 89.3                          | 51.7                               |
| 16    | <sup>t</sup> AmylOMe              | solution              | >97.5                         | solution                     | >90.0                         | n/a                                |
| 17    | EtOH                              | solution              | >96.1                         | solution                     | >98.0                         | n/a                                |
| 18    | MeOH                              | solution              | >92.6                         | solution                     | >98.4                         | n/a                                |
| 19    | Ethyl lactate                     | slurry                | 43.4                          | solution                     | >75.9                         | n/a                                |
| 20    | IPA                               | solution              | >94.5                         | solution                     | >99.6                         | n/a                                |
| 21    | <sup>i</sup> BuOAc                | slurry                | 21.4                          | slurry                       | 41.4                          | 20                                 |
| 22    | 1,2-dimethoxyethane               | hazy solution         | >95                           | solution                     | >101.6                        | n/a                                |
| 23    | MeCN and H <sub>2</sub> O (50:50) | hazy solution         | >42.6                         | hazy solution                | 56.1                          | n/a                                |
| 24    | PhMe and MeOH (70:30)             | solution              | >91.5                         | solution                     | >92.1                         | n/a                                |
| 25    | MeCN and H <sub>2</sub> O (80:20) | solution              | >98.3                         | solution                     | >102.8                        | n/a                                |
| 26    | Cyclohexanone                     | light yellow solution | >106.1                        | brown solution               | >108.5                        | n/a                                |
| 27    | Heptane                           | slurry                | 0.0                           | slurry                       | 0.0                           | 0                                  |
| 28    | Cyclohexane                       | slurry                | 0.0                           | slurry                       | 0.0                           | 0                                  |

|    |                                 |               |       |                         |        |      |
|----|---------------------------------|---------------|-------|-------------------------|--------|------|
| 29 | H <sub>2</sub> O                | solids        | 0.0   | solution, crust on vial | 0.0    | 0    |
| 30 | CH <sub>2</sub> Cl <sub>2</sub> | solution      | >83.0 | solution                | >106.3 | n/a  |
| 31 | HFIP                            | solution      | >82.2 | solution                | >93.0  | n/a  |
| 32 | Dioxane                         | hazy solution | >88.9 | solution, crust on vial | 93.9   | n/a  |
| 33 | CPME                            | slurry        | 23.5  | thin slurry             | 57.8   | 34.3 |
| 34 | dibutyl ether                   | slurry        | 0.0   | slurry                  | 0.0    | 0    |
| 35 | <sup>t</sup> AmylOMe            | slurry        | 0.0   | thin slurry             | 30.6   | 30.6 |

**Methyl 5-bromo-1-isobutyl-1*H*-indazole-6-carboxylate·*p*TSA solubility in MeCN and PhMe mixtures**

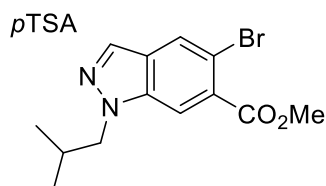

methyl 5-bromo-1-isobutyl-1*H*-indazole-6-carboxylate·*p*TSA (102 mg, 0.21 mmol, 1.0 equiv) was dispensed into 2 mL HPLC vial vials equipped with a stirrer bar. Solvent (750  $\mu$ L) was added, and the vials were stirred at 10 °C overnight, then 50 °C overnight.

When sampled, the vials were centrifuged for 30 min. Supernatant (30  $\mu$ L) was removed and dissolved in MeOH (1 mL) for LCMS. Solubility was determined by LCMS with methyl 5-bromo-1-isobutyl-1*H*-indazole-6-carboxylate·*p*TSA external standard. External standard prepared by diluting methyl 5-bromo-1-isobutyl-1*H*-indazole-6-carboxylate·*p*TSA (136 mg, 0.28 mmol) in MeOH (1 mL), then diluting 30  $\mu$ L of this solution in MeOH (1 mL).

| entry | solvent               | visual<br>at 10 °C | solubility<br>at 10 °C<br>(g /L) | visual<br>at 50 °C | solubility<br>at 50 °C<br>(g /L) |
|-------|-----------------------|--------------------|----------------------------------|--------------------|----------------------------------|
| 1     | MeCN                  | slurry             | 25.1                             | solution           | >136                             |
| 2     | PhMe and MeCN (10:90) | slurry             | 32.5                             | solution           | >136                             |
| 3     | PhMe and MeCN (20:80) | slurry             | 42.0                             | solution           | >136                             |
| 4     | PhMe and MeCN (30:70) | slurry             | 50.5                             | solution           | >136                             |
| 5     | PhMe and MeCN (40:60) | slurry             | 57.1                             | solution           | >136                             |
| 6     | PhMe and MeCN (50:50) | slurry             | 61.8                             | solution           | >136                             |
| 7     | PhMe and MeCN (60:40) | slurry             | 63.7                             | solution           | >136                             |
| 8     | PhMe and MeCN (70:30) | slurry             | 58.2                             | solution           | >136                             |
| 9     | PhMe and MeCN (80:20) | slurry             | 44.8                             | solution           | >136                             |
| 10    | PhMe and MeCN (90:10) | slurry             | 33.5                             | slurry             | 93.4                             |
| 11    | PhMe                  | slurry             | 28.3                             | slurry             | 24.4                             |

solubility (g /L) vs. entry, solvent

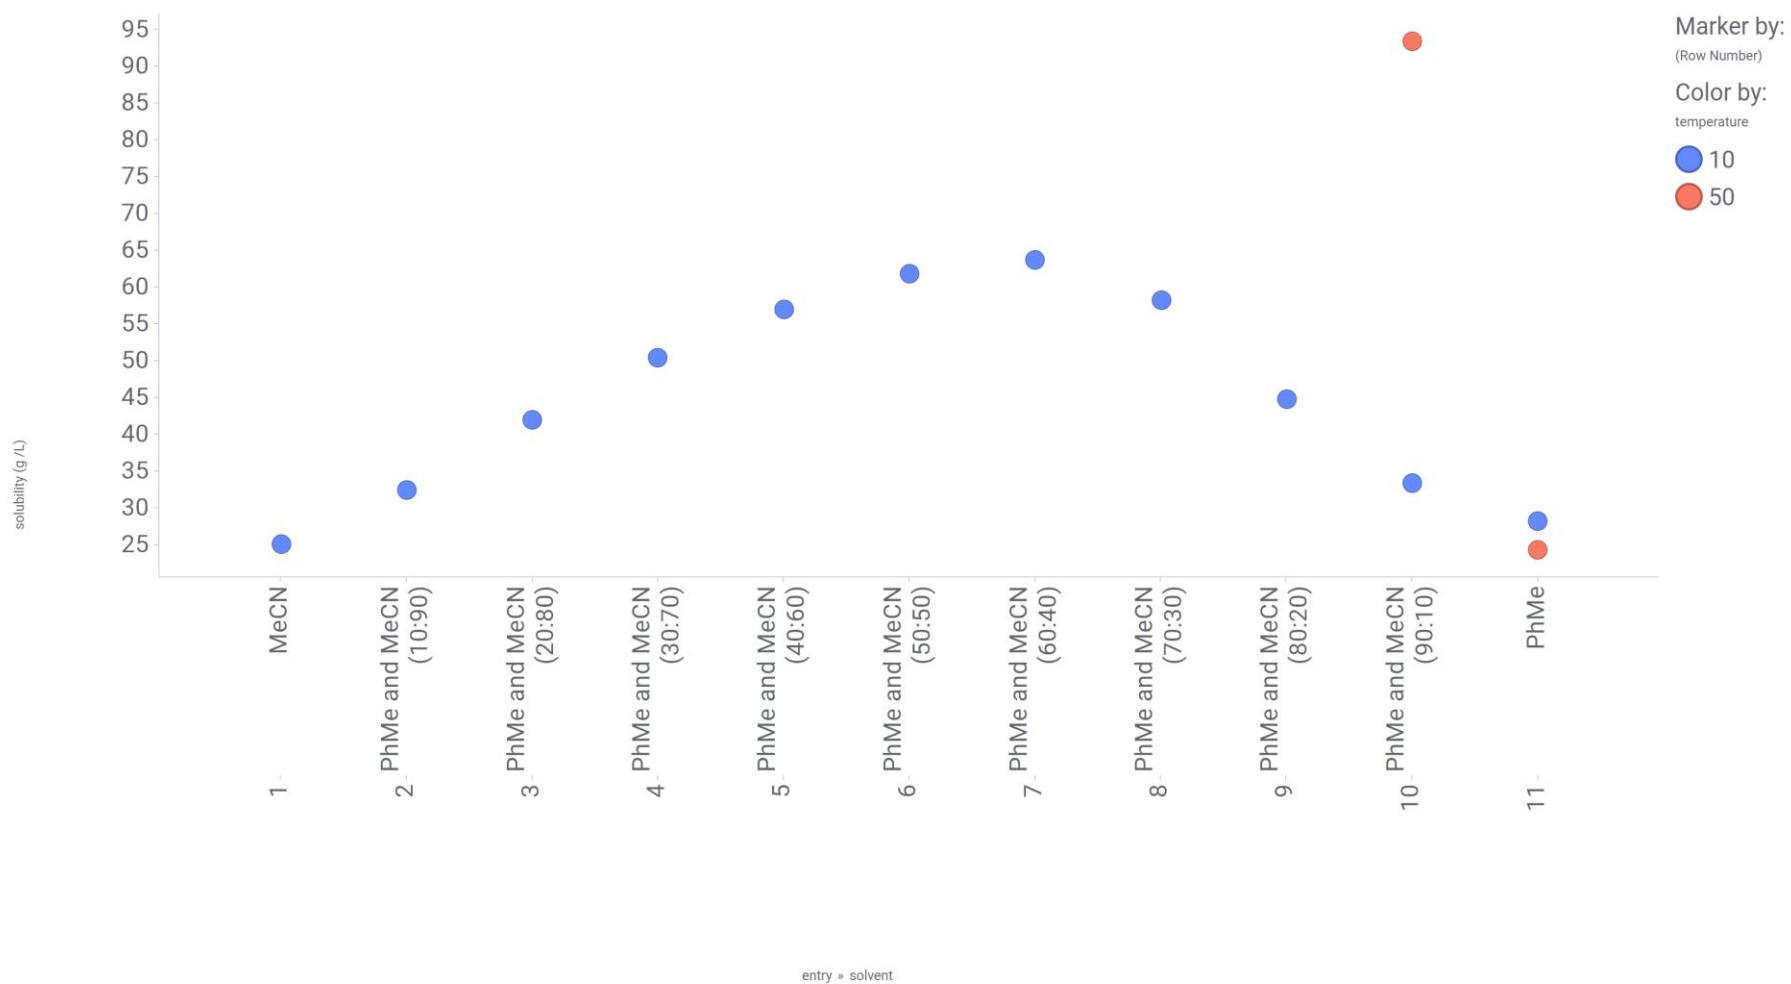

### Heat/cool cycle

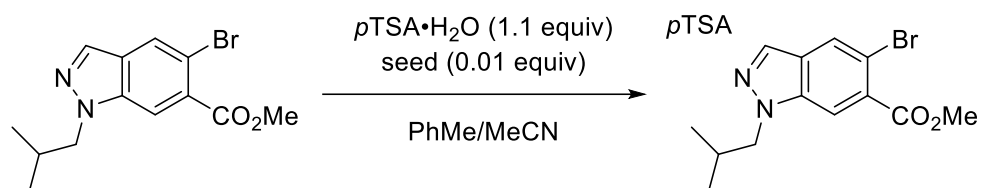

*p*TSA·H<sub>2</sub>O (6.25 g, 32.3 mmol, 1.1 equiv) was added to a solution of methyl 5-bromo-1-isobutyl-1*H*-indazole-6-carboxylate (7.50 g, 29.4 mmol, 1.0 equiv) in PhMe (50.25 mL) and MeCN (16.5 mL) at 50 °C. The solution was adjusted to the indicated temperature, seeded with methyl 5-bromo-1-isobutyl-1*H*-indazole-6-carboxylate·*p*TSA (0.16 g, 0.294 mmol, 0.01 equiv) (*t* = 0) and the temperature was controlled as indicated. The slurry was left to stir at 10 °C overnight. Solids were collected by filtration (4.2 cm diameter filter, 50 kPa vacuum), washed with PhMe, and dried to afford methyl 5-bromo-1-isobutyl-1*H*-indazole-6-carboxylate·*p*TSA.

| entry | temperature/time control                                                                                                             | yield | filtration time | microscope visual (same scale)                                                       |
|-------|--------------------------------------------------------------------------------------------------------------------------------------|-------|-----------------|--------------------------------------------------------------------------------------|
| 1     | 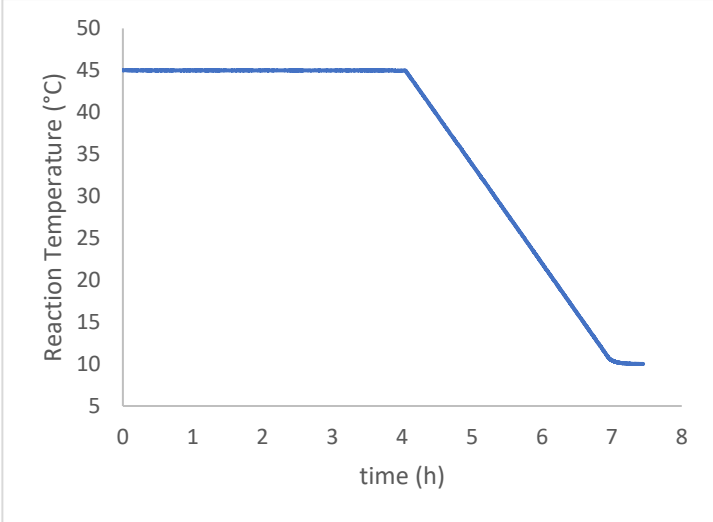 <p>Reaction Temperature (°C)</p> <p>time (h)</p>  | 73%   | 29 s            | 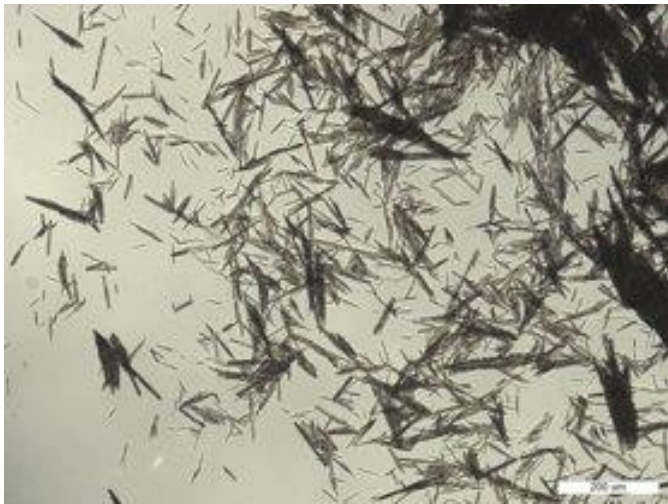  |
| 2     | 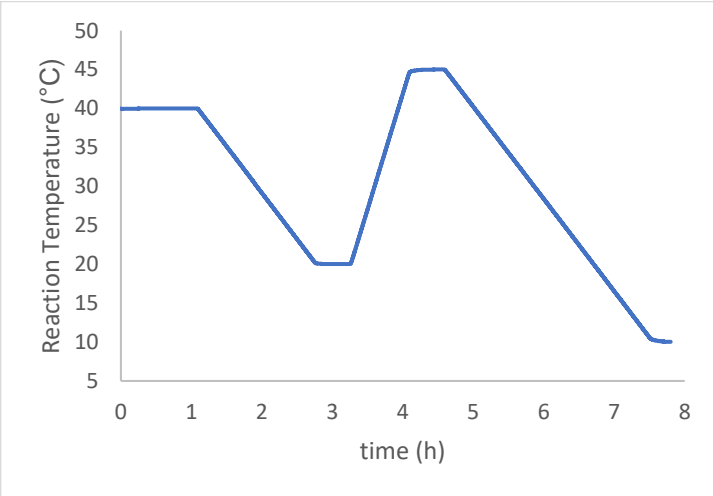 <p>Reaction Temperature (°C)</p> <p>time (h)</p> | 76%   | 16 s            | 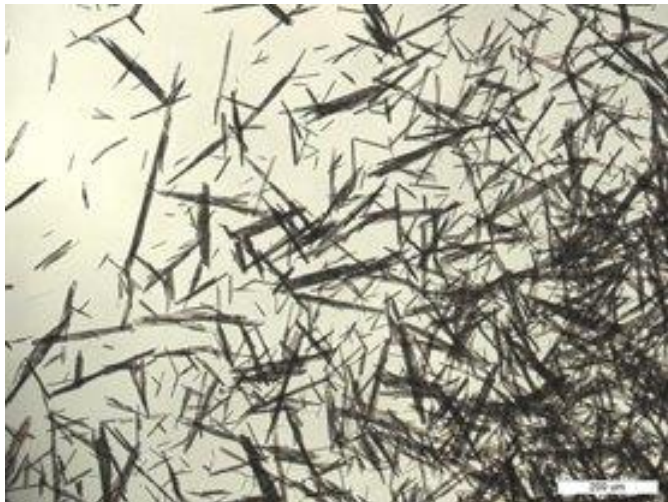 |

## Temperature dependent solubility



Temperature dependent solubility data was collected on a Technobis Crystal16. Vials were charged with methyl 5-bromo-1-isobutyl-1*H*-indazole-6-carboxylate-*p*TSA and dissolved in solvents as indicated. Samples were placed in a Crystal16, held at 20 °C for 30 min, heated to 75 °C at 0.2 °C/min then cooled to -5 °C at 0.1 °C/min. The cycle was repeated three times.

| entry | mass (mg) | solvents                    | dissolution temperature (°C) |         |         | crystallization temperature (°C) |         |         |
|-------|-----------|-----------------------------|------------------------------|---------|---------|----------------------------------|---------|---------|
|       |           |                             | cycle 1                      | cycle 2 | cycle 3 | cycle 1                          | cycle 2 | cycle 3 |
| 1     | 29.6      | PhMe and MeCN (1 mL, 75:25) | 22.3                         |         |         |                                  |         |         |
|       | 52.3      |                             | 32.8                         |         | 31.1    |                                  | -4.7    | -4.9    |
|       | 81.1      |                             | 40.5                         | 39.9    | 39.0    | 8.8                              | 3.9     | 3.4     |
|       | 100.5     |                             | 44.1                         | 43.6    | 42.2    | 17.7                             | -3.8    | 20.5    |
| 2     | 33.7      | PhMe and MeCN (1 mL, 80:20) | 28.0                         | 27.6    | 27.8    | 1.6                              | 0.4     | -4.9    |
|       | 49.1      |                             | 34.6                         | 34.0    | 33.9    | -2.8                             | 4.6     | 8.5     |
|       | 83.1      |                             | 43.9                         | 43.5    | 43.0    | 19.9                             | 30.5    | 28.1    |
|       | 96.7      |                             | 46.7                         | 47.0    | 47.0    | 9.9                              | 0.3     | 20.6    |
| 3     | 24.0      | PhMe and MeCN (1 mL, 85:15) | 25.9                         | 24.6    | 24.3    | -1.8                             | -4.9    | -4.9    |
|       | 41.8      |                             | 35.5                         | 34.3    | 34.0    | 10.5                             | 7.8     | 20.1    |
|       | 60.9      |                             | 43.3                         | 41.9    | 40.9    | 17.6                             | 9.3     | 23.8    |
|       | 81.2      |                             | 48.8                         | 47.6    | 47.5    | 22.9                             | 31.9    | 26.5    |
| 4     | 22.7      | PhMe and MeCN (1 mL, 90:10) | 29.8                         | 28.8    | 28.3    | 12.1                             | -1.8    | -4.9    |
|       | 42.0      |                             | 40.9                         | 40.2    | 39.6    | 16.8                             | 24.2    | 26.5    |
|       | 60.4      |                             | 47.6                         | 46.5    | 46.0    | 21.3                             | 15.9    | 19.5    |
|       | 79.3      |                             | 52.7                         | 50.9    | 51.0    | 19.8                             | 24.4    | 39.7    |

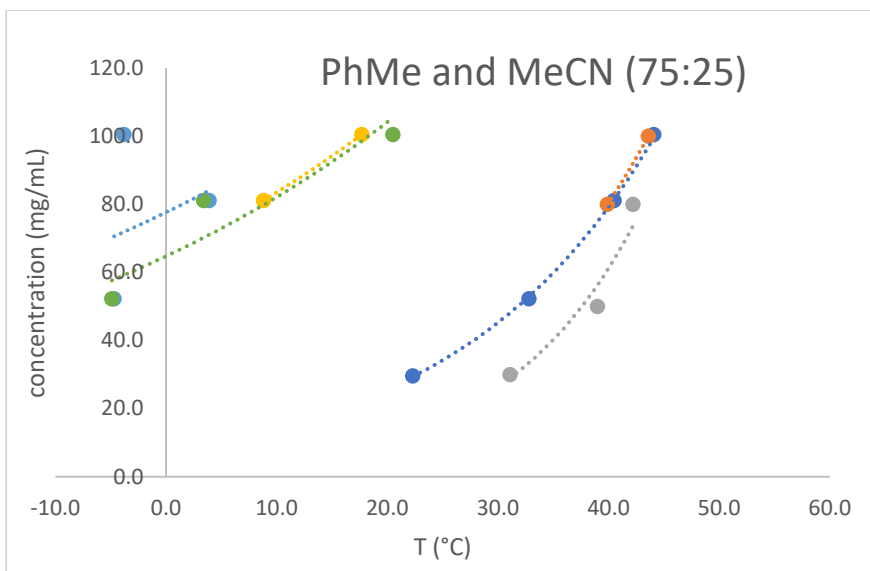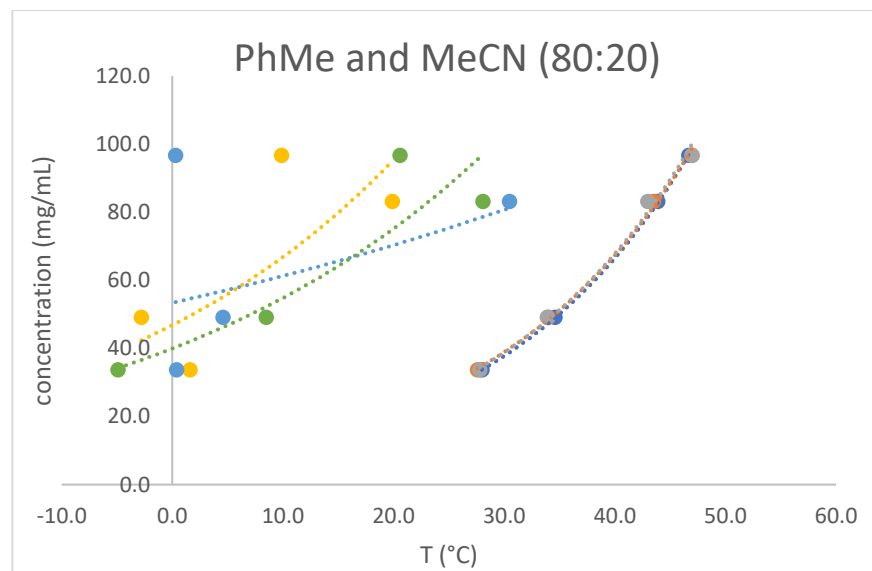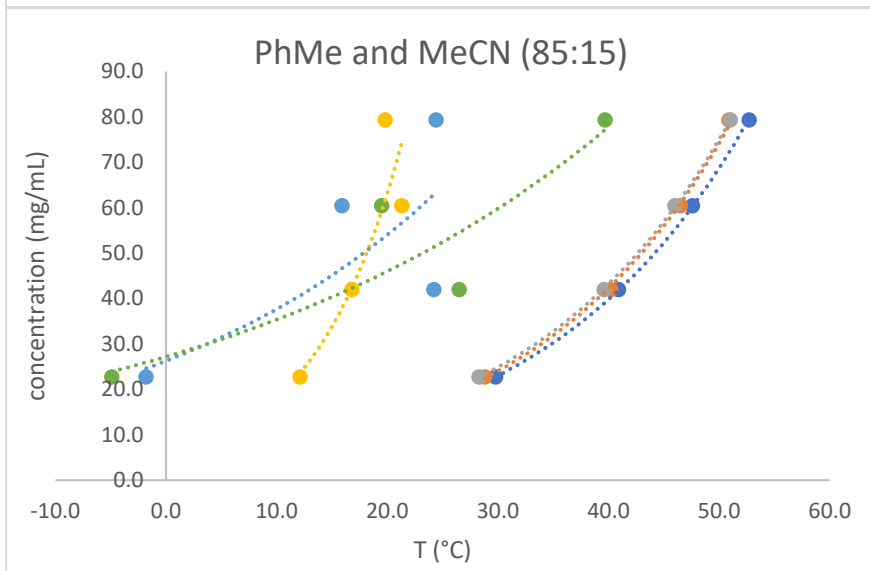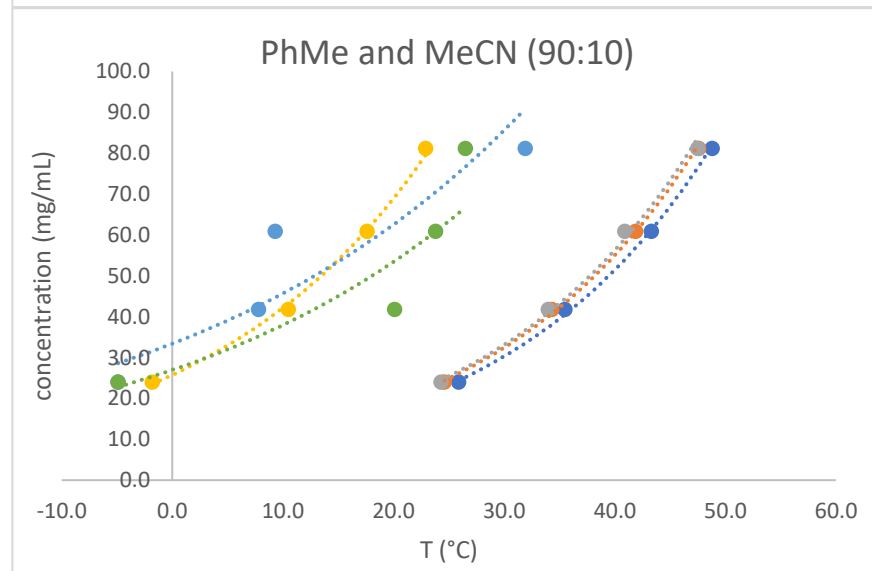

## Workup Improvements

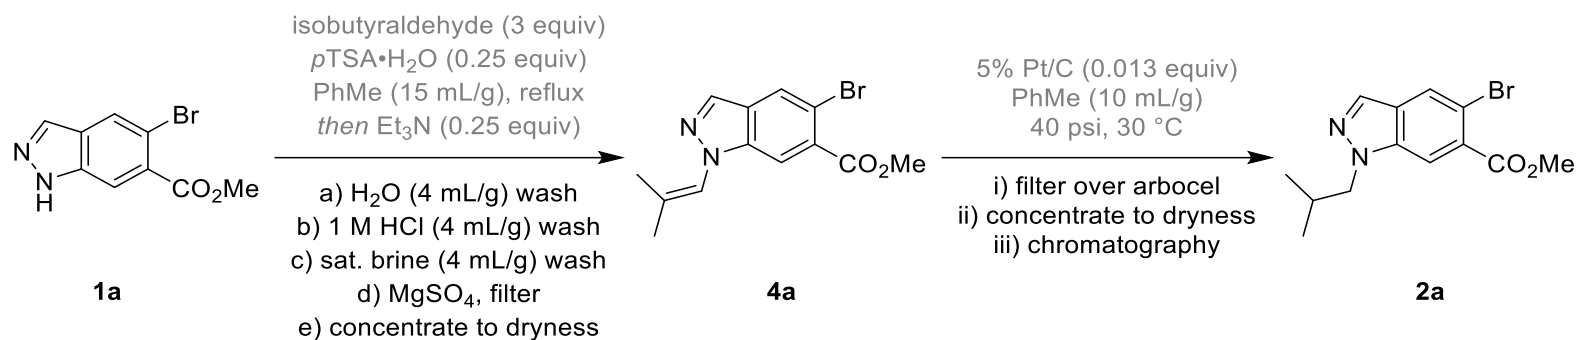

| entry | modifications (step 1)                                                                                                                                                                 | modifications (step 2)                                                              | conversion<br>(ratio <b>4a:5a</b> ) | conversion<br>(ratio <b>2a:8a</b> ) | yield<br>(over two steps)        |
|-------|----------------------------------------------------------------------------------------------------------------------------------------------------------------------------------------|-------------------------------------------------------------------------------------|-------------------------------------|-------------------------------------|----------------------------------|
| 1     | none                                                                                                                                                                                   | none                                                                                | 97% (99:1)                          | >99% (100:0)                        | 76%                              |
| 2     | PhMe (20 mL/g); no Et <sub>3</sub> N<br>a) no H <sub>2</sub> O wash<br>b) no HCl wash<br>c) 23% brine wash (10 mL/g)<br>d) NaHCO <sub>3</sub> wash (2 × 8 mL/g)<br>e) no concentration | none                                                                                | 96% (91:9)                          | 99% (100:0)                         | 55%                              |
| 3     | isobutyraldehyde (2 equiv); no Et <sub>3</sub> N<br>used directly for hydrogenation                                                                                                    | none<br>(sludge formed during<br>hydrogenation)                                     | 97% (92:8)                          | 51% (100:0)                         | 42% (as <i>p</i> TSA salt)       |
| 4     | <b>b) no HCl wash</b><br><b>c) 23% brine wash</b><br><b>d) no MgSO<sub>4</sub> filtration</b><br><b>e) concentration to 10 mL/g</b>                                                    | <b>ii) concentrate to 10 mL/g</b><br><b>iii) crystallisation (<i>p</i>TSA salt)</b> | <b>99% (97:3)</b>                   | <b>&gt;99% (98:2)</b>               | <b>67% (as <i>p</i>TSA salt)</b> |

## **Process Safety Analysis**

### **General Procedure for Differential Scanning Calorimetry (DSC)**

All DSC measurements were performed on a Mettler-Toledo differential scanning calorimeter. Approximately 3 to 5 mg of solid or 5 to 10 mg of liquid was weighed into a 40  $\mu\text{L}$  gold-plated high pressure DSC test cell system consisting of a crucible, rupture disk, and lid. The test cell was then sealed using a Jossi press. The test was as follows: ramp from 25 to 400  $^{\circ}\text{C}$  at 5  $^{\circ}\text{C min}^{-1}$ . Sample cells were reweighed after analysis to ensure no samples leaked during the test.

### **General Procedure for Thermal Screening Unit (TSU)**

All TSU measurements were performed on a HEL Thermal Screening Unit. A Hastelloy TSU cell incorporating a side insert thermocouple well,  $\frac{1}{4}$  in. stem and a  $\frac{1}{4}$  in. Swagelok nut and ferrule swaged onto the stem was weighed and the mass recorded. The material under study was charged to the test cell. The cell was reweighed and the mass recorded. Samples were tested by heating at 2 K  $\text{min}^{-1}$  from rt to 250  $^{\circ}\text{C}$  or a maximum pressure of 50 bara. Once the test cell cooled, the final pressure was noted and residual pressure calculated. The cell was reweighed and the mass recorded.

### **General Procedure for Accelerating Rate Calorimetry (ARC)**

All ARC measurements were performed on a Thermal Hazard Technology Accelerating Rate Calorimeter. A Hastelloy ARC test cell incorporating a bottom thermocouple clip and  $\frac{1}{4}$  in stem and the mass recorded. A  $\frac{1}{4}$  in Swagelok nut and ferrule were swaged onto the stem and the mass recorded. The material under study was charged to the test cell the mass recorded to allow the sample mass to be calculated. Samples were tested using a heat–wait–search procedure starting at 40  $^{\circ}\text{C}$  and heating in 5 K increments to a maximum temperature of 350  $^{\circ}\text{C}$  or a maximum pressure of 100 bara. Once the test cell had cooled the final pressure was noted and residual pressure calculated. The cell was reweighed and the mass recorded.

# Isobutyraldehyde

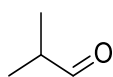

## DSC

| left limit (°C) | energy (J g <sup>-1</sup> ) | peak comments |
|-----------------|-----------------------------|---------------|
| 225             | -1                          | Exotherm      |
| 231             | -30                         | Exotherm      |

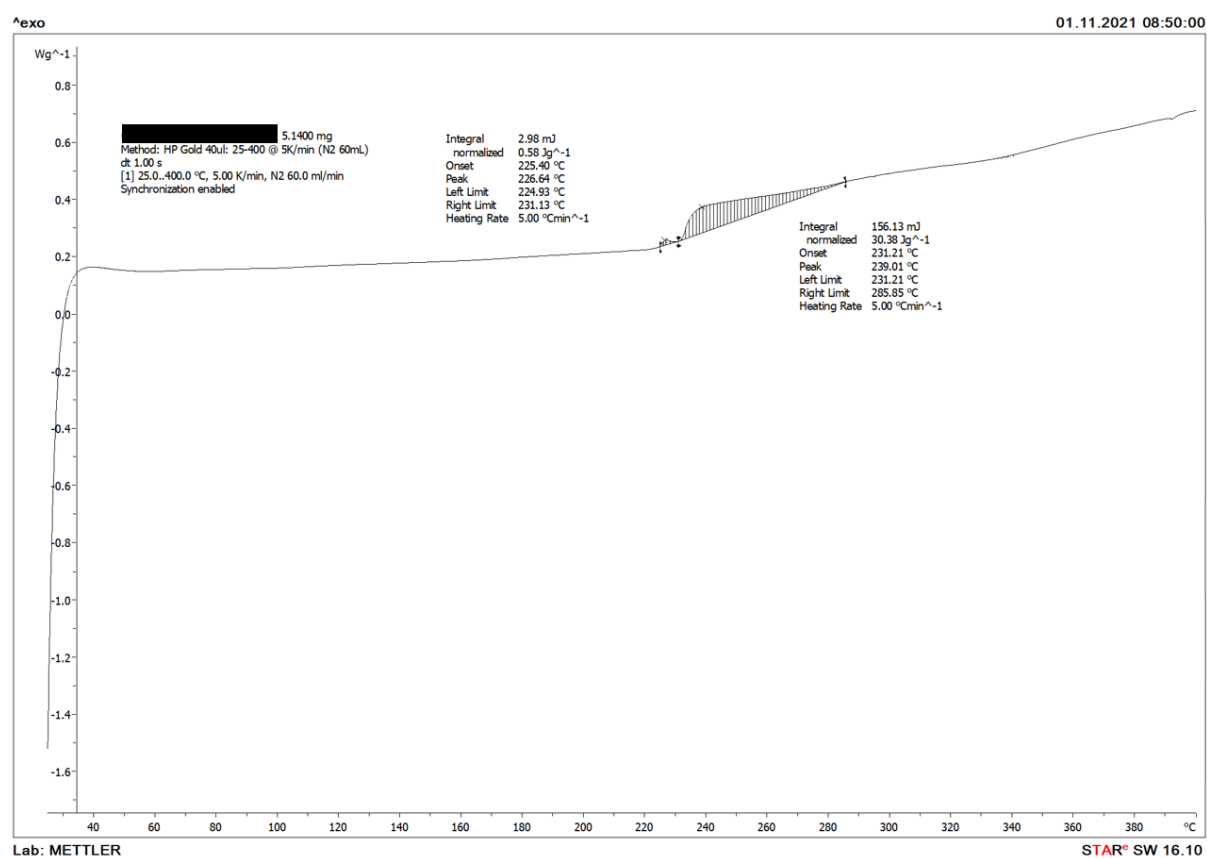

## ARC

| Thermal Onset (°C) | Max Rate (K/min) | Phi-corrected Adiabatic temp rise (K) | TMR@ temp (Phi corr)             | TD24 (°C)                        | Gas onset from Antoine Plot (°C) | ΔP at 32 °C (bar) | Max sample temp (°C) |
|--------------------|------------------|---------------------------------------|----------------------------------|----------------------------------|----------------------------------|-------------------|----------------------|
| 145                | 0.022            | 70                                    |                                  |                                  |                                  |                   |                      |
| 215                | 0.021            | 18                                    | Unable to determine <sup>a</sup> | Unable to determine <sup>a</sup> | 185                              | +28.5             | 303                  |
| 265                | 0.038            | 35                                    |                                  |                                  |                                  |                   |                      |
| 295                | 0.025            | >15                                   |                                  |                                  |                                  |                   |                      |

<sup>a</sup>TMR and TD24 were not determined due to there being an insufficient number of data points.

Phi Factor = 1.79

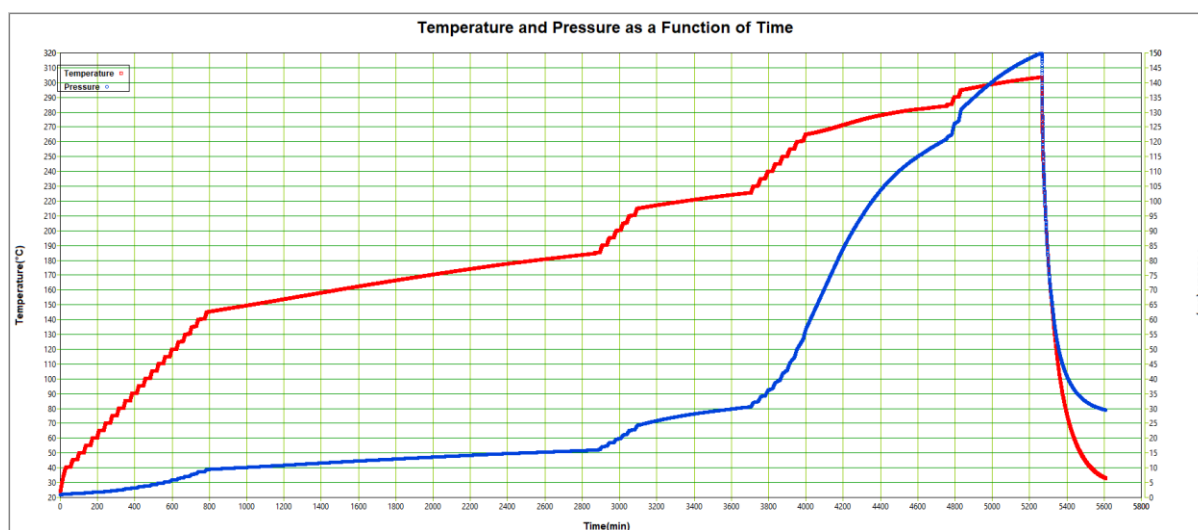

## Methyl 5-bromo-1H-indazole-6-carboxylate (1a)

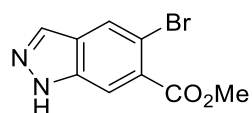

## DSC

| left limit (°C) | energy (J g <sup>-1</sup> ) | peak comments |
|-----------------|-----------------------------|---------------|
| 130             | 95                          | Endotherm     |
| 213             | -358                        | Exotherm      |

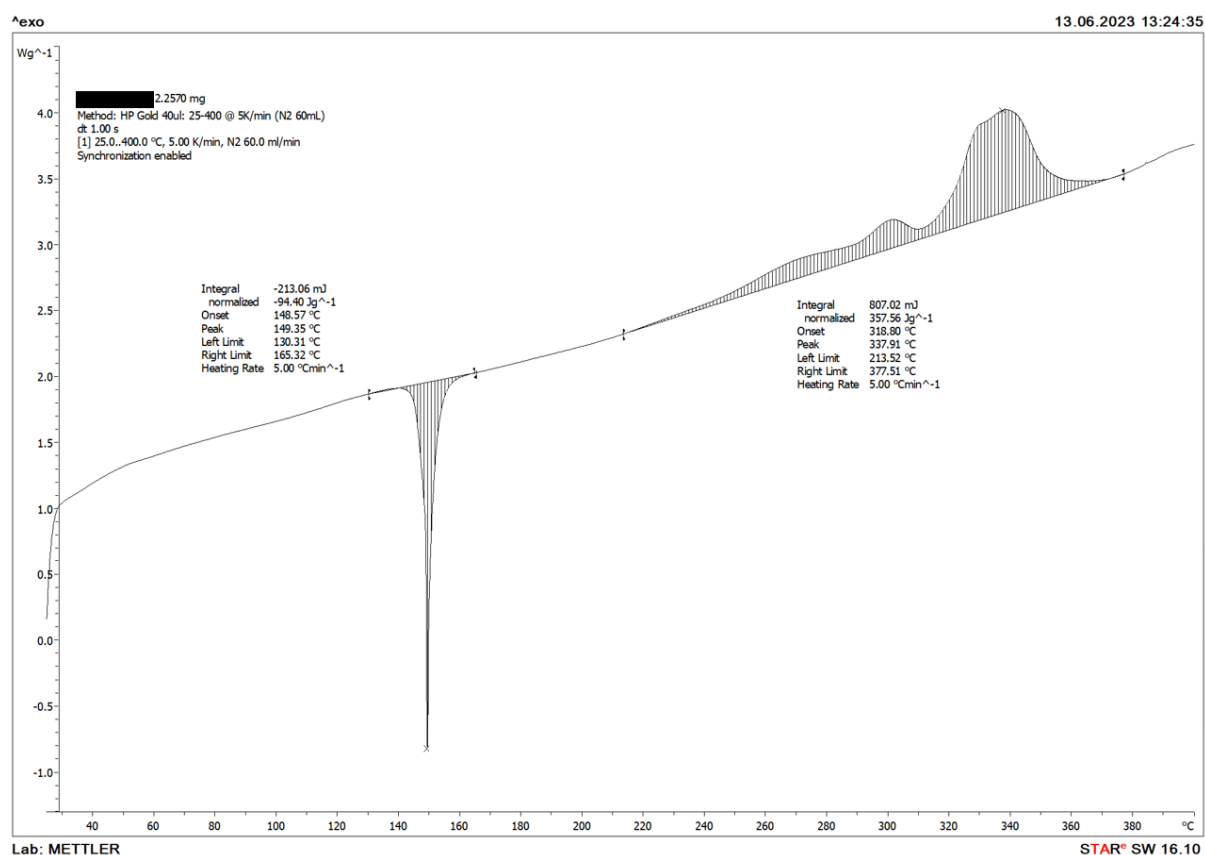

STAR® SW 16.10

## ARC

| Thermal Onset (°C) | Max Rate (K/min) | Phi-corrected Adiabatic temp rise (K) | TMR@ temp (Phi corr) | TD24 (°C) | Gas onset from Antoine Plot (°C) | $\Delta P$ at 34 °C (bar) | Max sample temp (°C) |
|--------------------|------------------|---------------------------------------|----------------------|-----------|----------------------------------|---------------------------|----------------------|
| 165                | 0.072            | 46                                    | 2.58 days @150 °C    | 154       | 259                              | +21.7                     | 375                  |
| 195                | 0.051            | 17                                    |                      |           |                                  |                           |                      |
| 222                | >137             | >317                                  |                      |           |                                  |                           |                      |

Phi Factor = 2.07

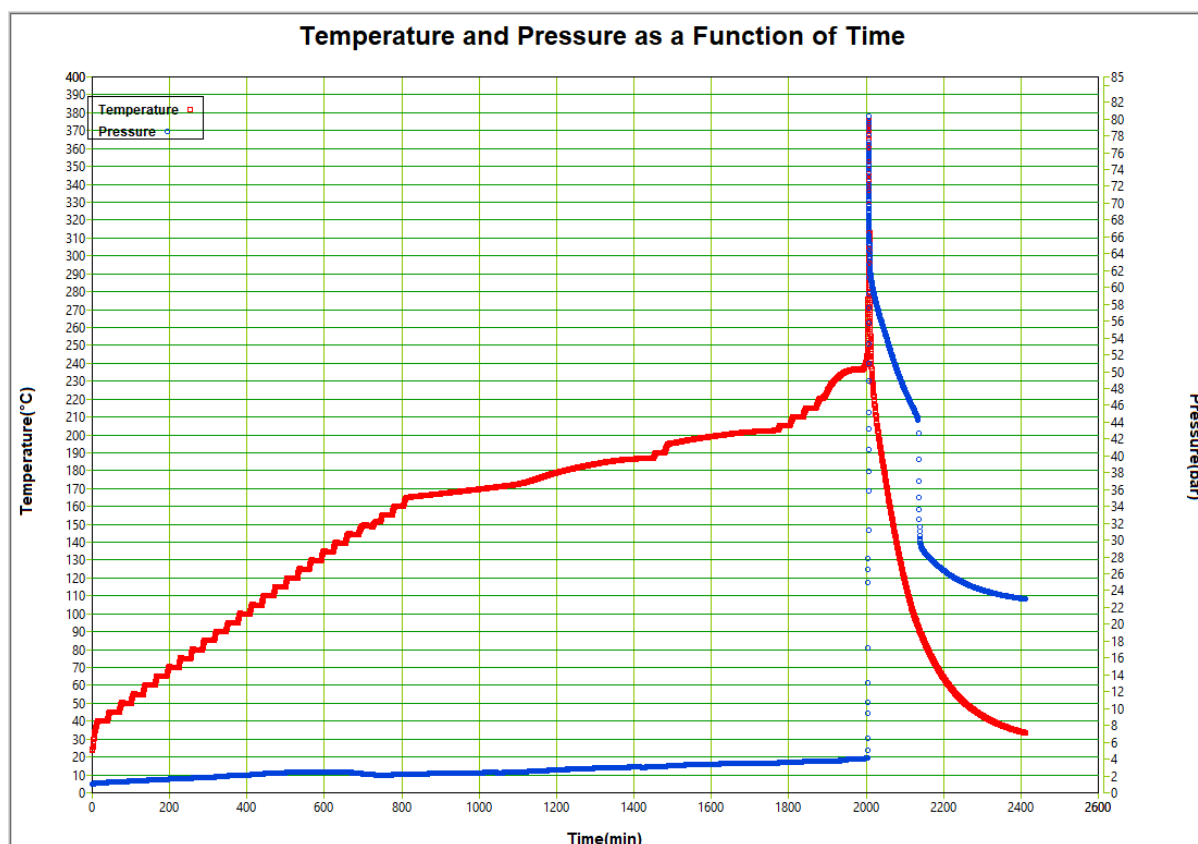

**pTSA·H<sub>2</sub>O**

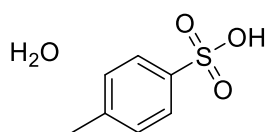

**DSC**

| left limit (°C) | energy (J g <sup>-1</sup> ) | peak comments |
|-----------------|-----------------------------|---------------|
| 64              | 4                           | Endotherm     |
| 89              | 128                         | Endotherm     |
| 221             | -27                         | Exotherm      |
| 269             | 153                         | Endotherm     |
| 312             | -431                        | Exotherm      |

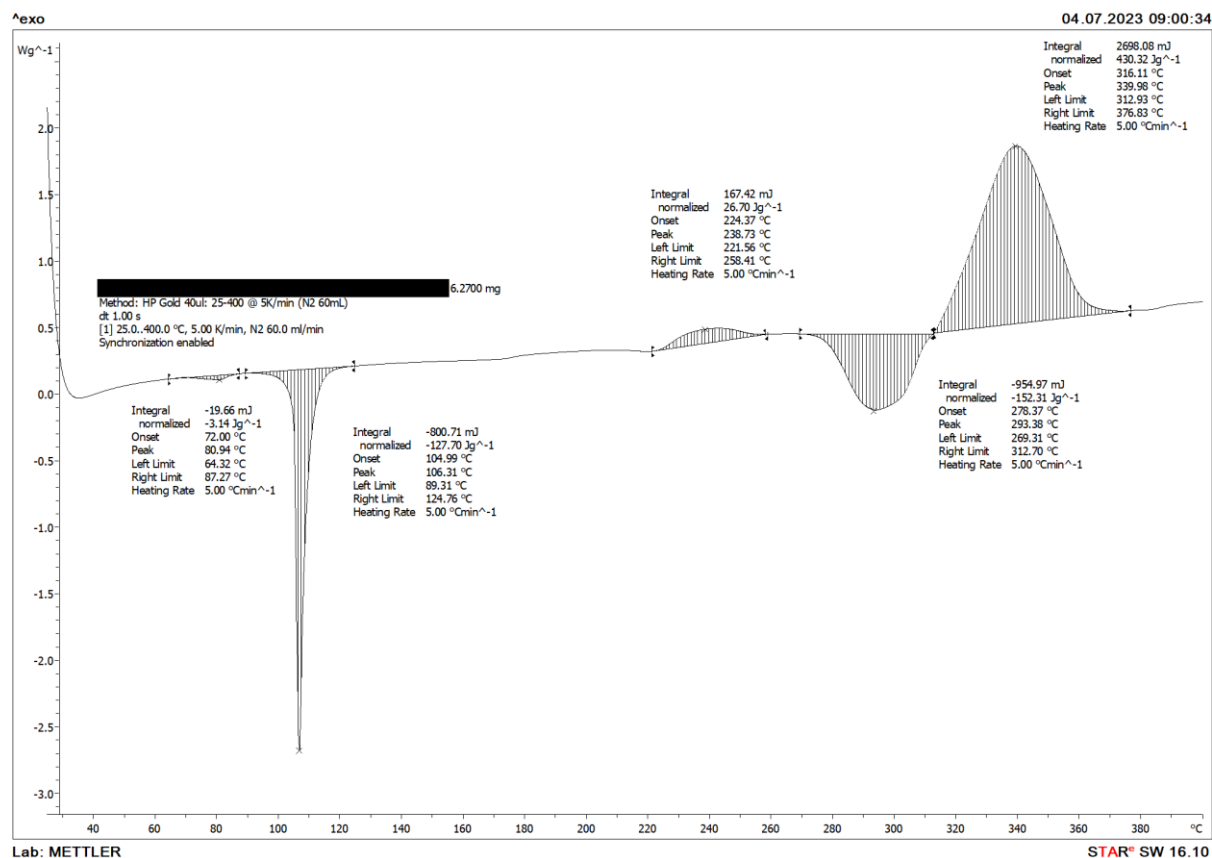

## ARC

Thermal inertia = 1.76.

| Thermal Onset (°C) | Phi-corrected Adiabatic temp rise (°C) | TMR @temp (Phi corr)                         | Gas onset from T&P trace (°C) | $\Delta P$ at 25°C (bar)    | Max sample temp (°C) |
|--------------------|----------------------------------------|----------------------------------------------|-------------------------------|-----------------------------|----------------------|
| 170                | 46                                     | Not Calculated <sup>b</sup>                  |                               |                             |                      |
| 235                | >97 <sup>a</sup>                       | TMR @ 180 °C =<br>5.27 days<br>TD24 = 201 °C | 135                           | not calculated <sup>c</sup> | 293 <sup>d</sup>     |

<sup>a</sup>The test cell appears to of leaked from 293 °C, due to this the phi corrected adiabatic temperature rise and TMR/TD24 has been calculated up to 290 °C. This is considered conservative as a max rate may not have been reached.

<sup>b</sup>The TMR/TD24 for the first exotherm was not calculated because the exotherm follows non standard kinetics.

<sup>c</sup>Residual pressure was not calculated due to the test cell leaking from 293 °C.

<sup>d</sup>test cell leaked from 293 °C.

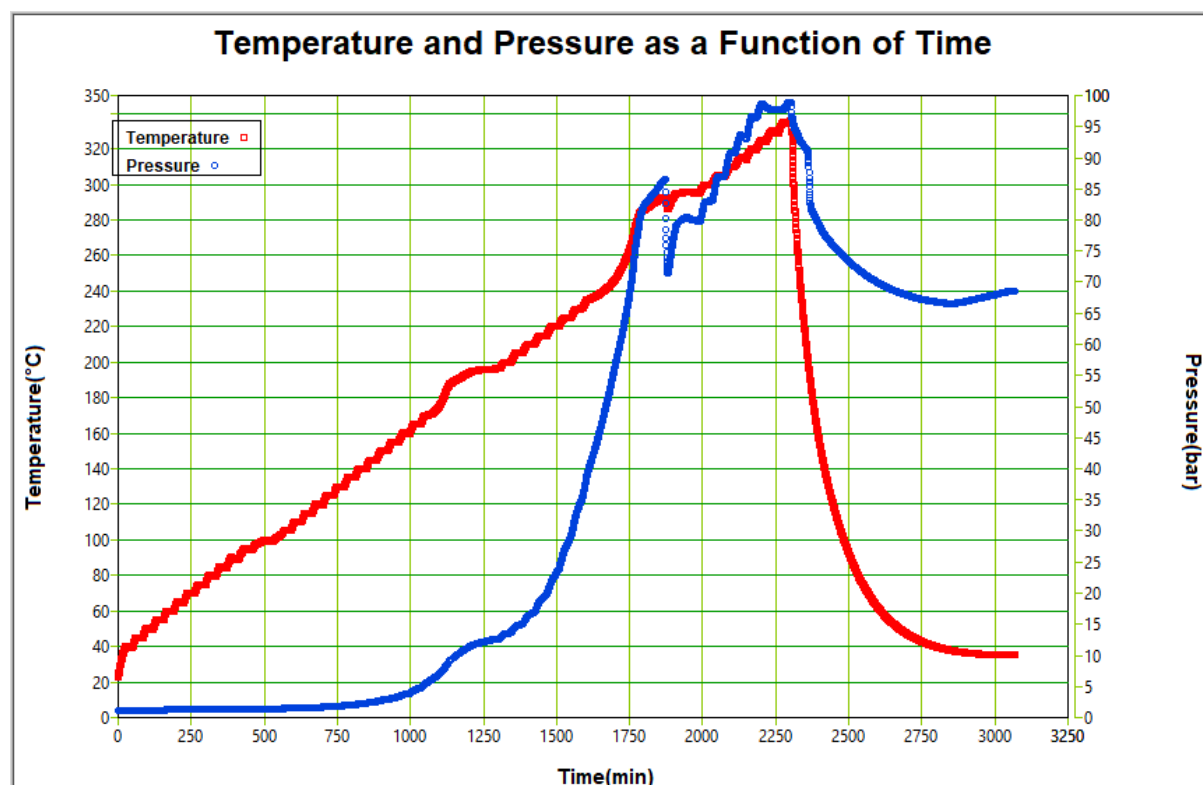

# Methyl 5-bromo-1-(2-methylprop-1-en-1-yl)-1H-indazole-6-carboxylate (4a)

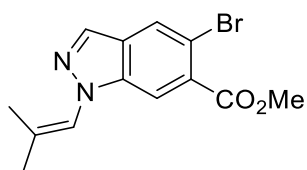

## DSC

| left limit (°C) | energy (J g <sup>-1</sup> ) | peak comments |
|-----------------|-----------------------------|---------------|
| 61              | 69                          | Endotherm     |
| 178             | -12                         | Exotherm      |
| 255             | -803                        | Exotherm      |

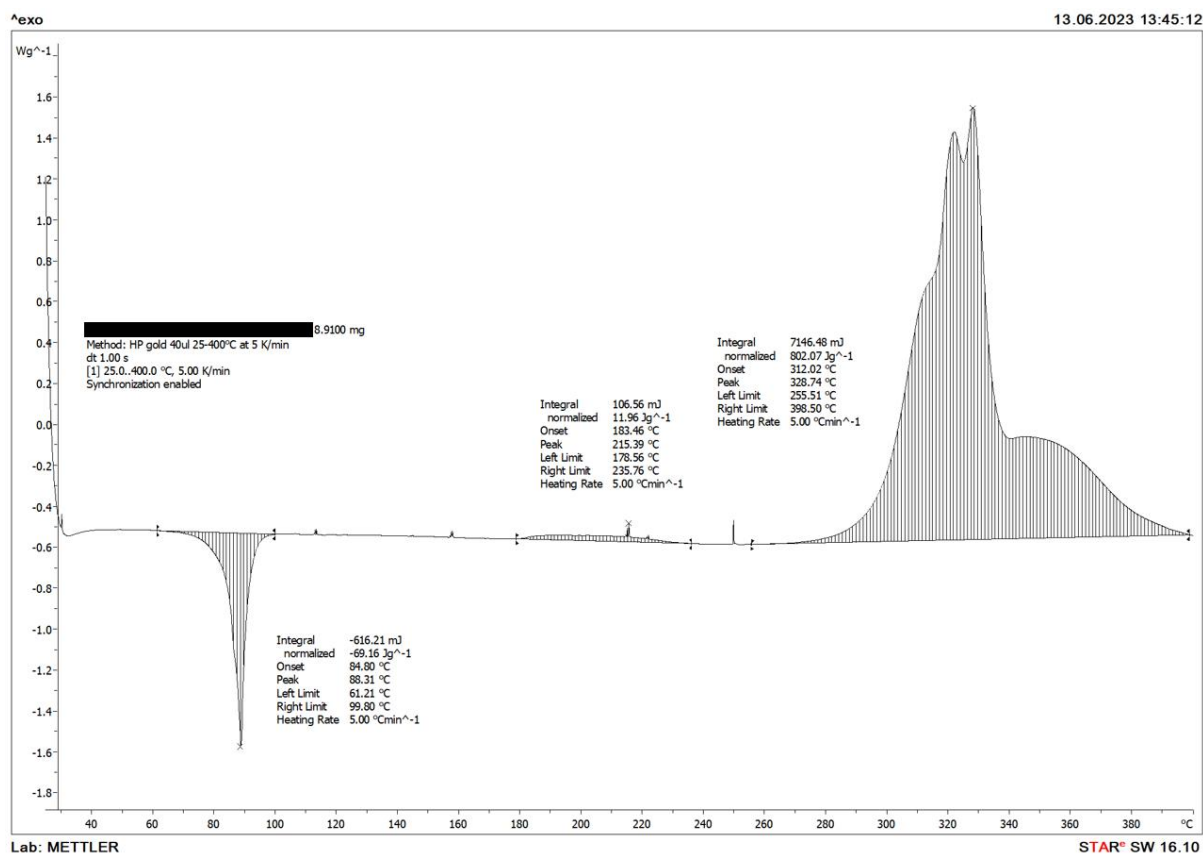

## ARC

| Thermal Onset (°C) | Max Rate (K/min) | Phi-corrected Adiabatic temp rise (K) | TMR@ temp (Phi corr)        | TD24 (°C)                   | Gas onset from Antoine Plot (°C) | ΔP at 26 °C (bar) | Max sample temp (°C) |
|--------------------|------------------|---------------------------------------|-----------------------------|-----------------------------|----------------------------------|-------------------|----------------------|
| 205                | >147             | >503                                  | Not Calculated <sup>a</sup> | Not Calculated <sup>a</sup> | 120                              | +23.03            | 442                  |

<sup>a</sup>TMR and TD24 were not calculated due to the heating rate of the exotherm exceeding the rate of the heaters.  
Phi Factor = 2.12

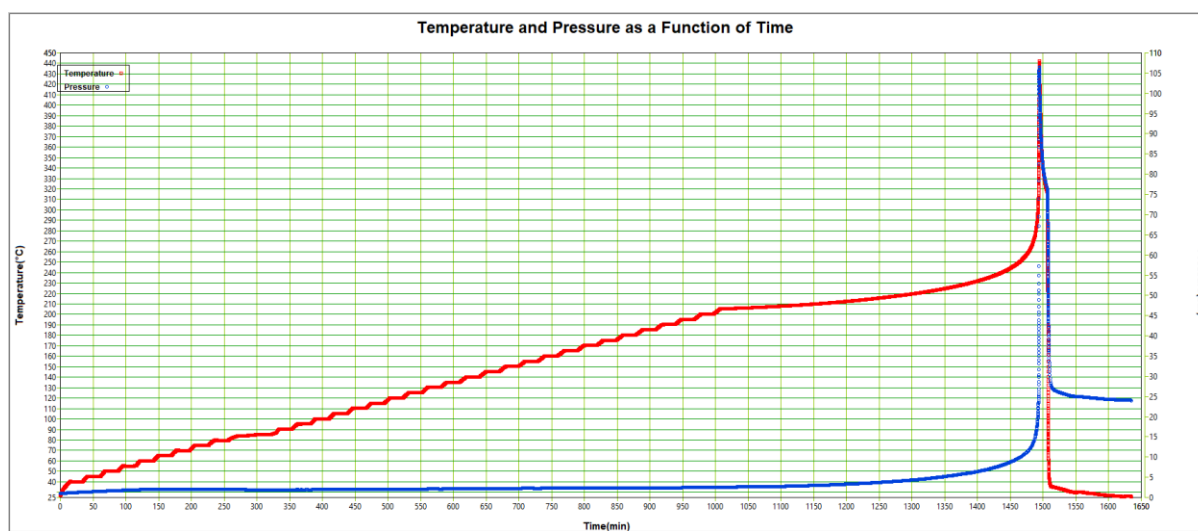

# Methyl 5-bromo-1-isobutyl-1*H*-indazole-6-carboxylate (2a)

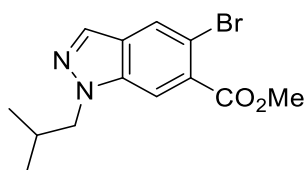

## DSC

| left limit (°C) | energy (J g <sup>-1</sup> ) | peak comments |
|-----------------|-----------------------------|---------------|
| 241             | -105                        | Exotherm      |
| 273             | -17                         | Exotherm      |
| 323             | -169                        | Exotherm      |

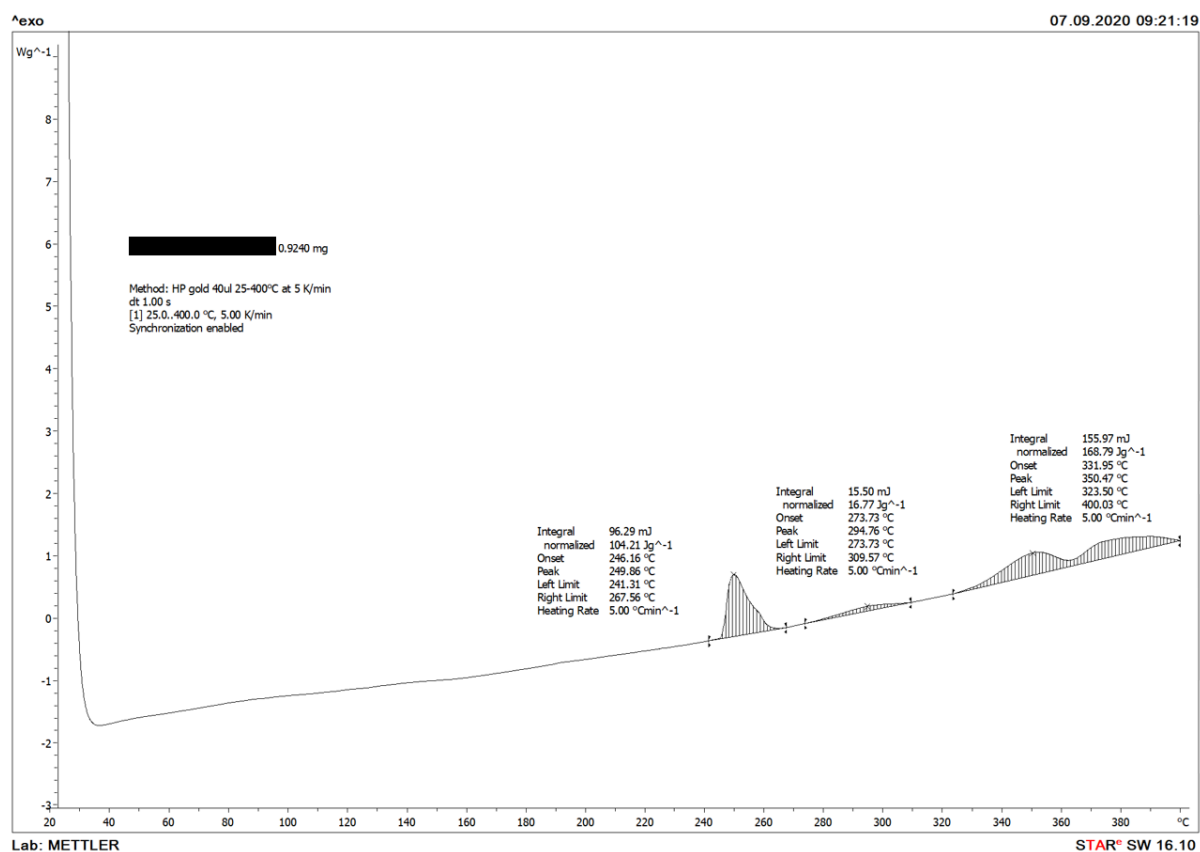

## ARC

| Thermal Onset (°C) | Max Rate (K/min) | Phi-corrected Adiabatic temp rise (K) | TMR@ temp (Phi corr)        | TD24 (°C)                   | Gas onset from Antoine Plot (°C) | $\Delta P$ at 34 °C (bar) | Max sample temp (°C) |
|--------------------|------------------|---------------------------------------|-----------------------------|-----------------------------|----------------------------------|---------------------------|----------------------|
| 255                | >600             | >228                                  | Not Calculated <sup>a</sup> | Not Calculated <sup>a</sup> | 223                              | +16.83                    | 367                  |

<sup>a</sup>TMR and TD24 were not calculated due to the exotherm heating rate exceeded the sample heaters.  
Phi Factor = 2.03

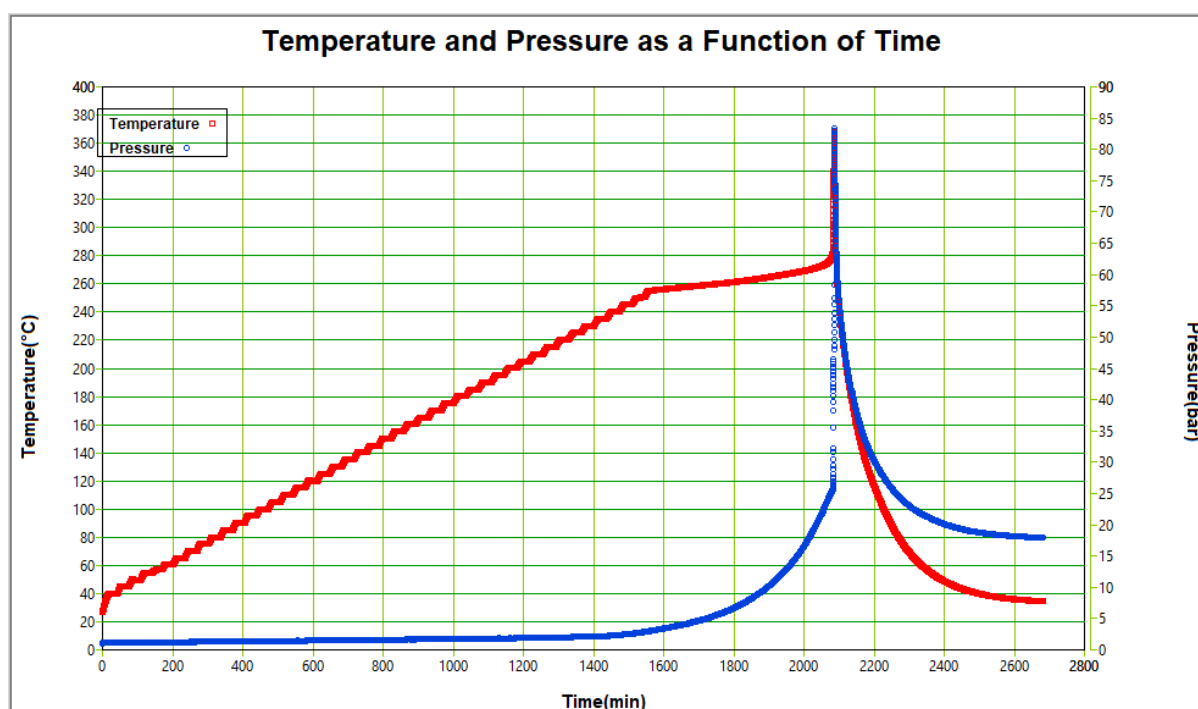

# Methyl 5-bromo-1-isobutyl-1H-indazole-6-carboxylate·pTSA (2a·pTSA)

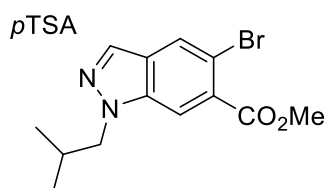

## DSC

| left limit (°C) | energy (J g <sup>-1</sup> ) | peak comments |
|-----------------|-----------------------------|---------------|
| 114             | 105                         | Endotherm     |
| 172             | -204                        | Exotherm      |
| 311             | >-739                       | Exotherm      |

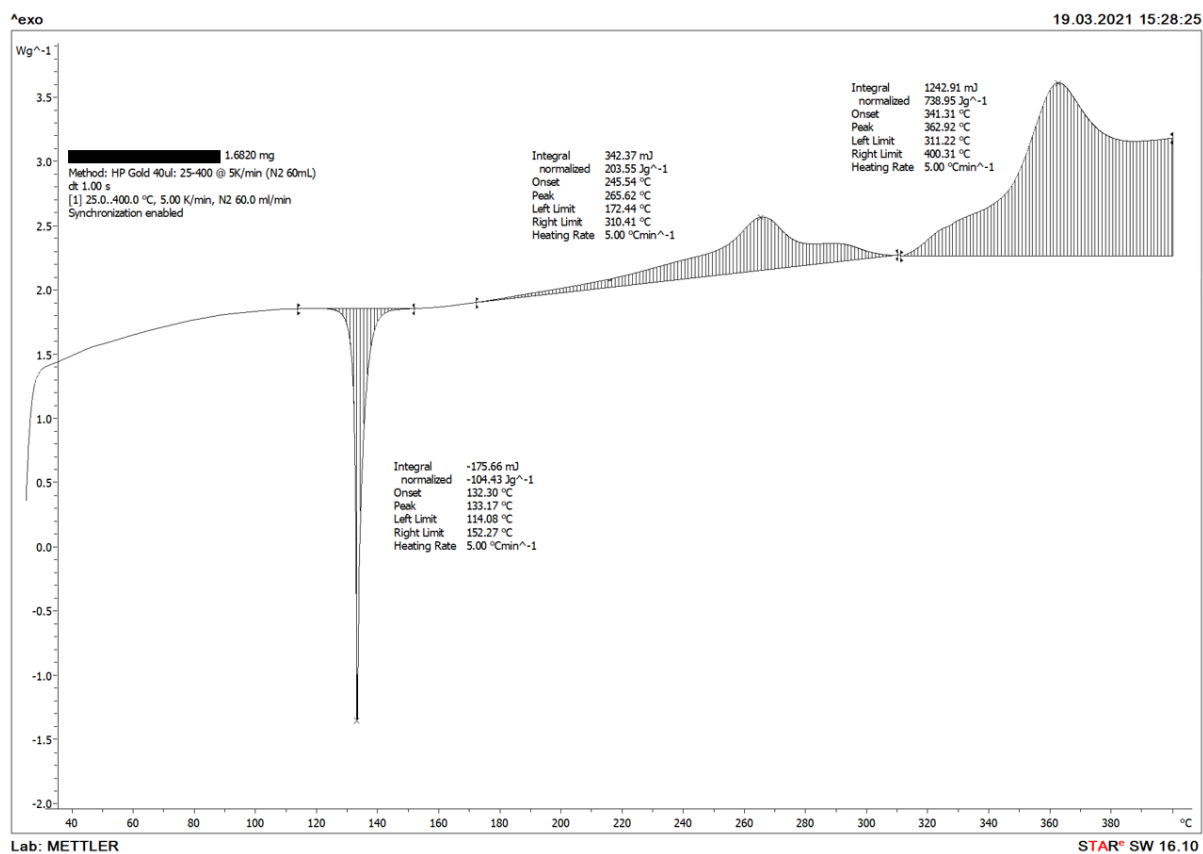

## ARC

| Thermal Onset (°C) | Max Rate (K/min) | Phi-corrected Adiabatic temp rise (K) | TMR@ temp (Phi corr)        | TD24 (°C)                   | Gas onset from Antoine Plot (°C) | $\Delta P$ at 33 °C (bar) | Max sample temp (°C) |
|--------------------|------------------|---------------------------------------|-----------------------------|-----------------------------|----------------------------------|---------------------------|----------------------|
| 140                | 0.023            | 5                                     |                             |                             |                                  |                           |                      |
| 160                | 0.021            | 5                                     |                             |                             |                                  |                           |                      |
| 245                | 12.203           | >210                                  | Not Calculated <sup>a</sup> | Not Calculated <sup>a</sup> | 196                              | +16.96                    | 350                  |

<sup>a</sup>TMR and TD24 were not calculated due to an insufficient number of data points for the first and second exotherm. For the third exotherm TMR and TD24 were not calculated due to the exotherm showing non-standard kinetics.

Phi Factor = 2.03

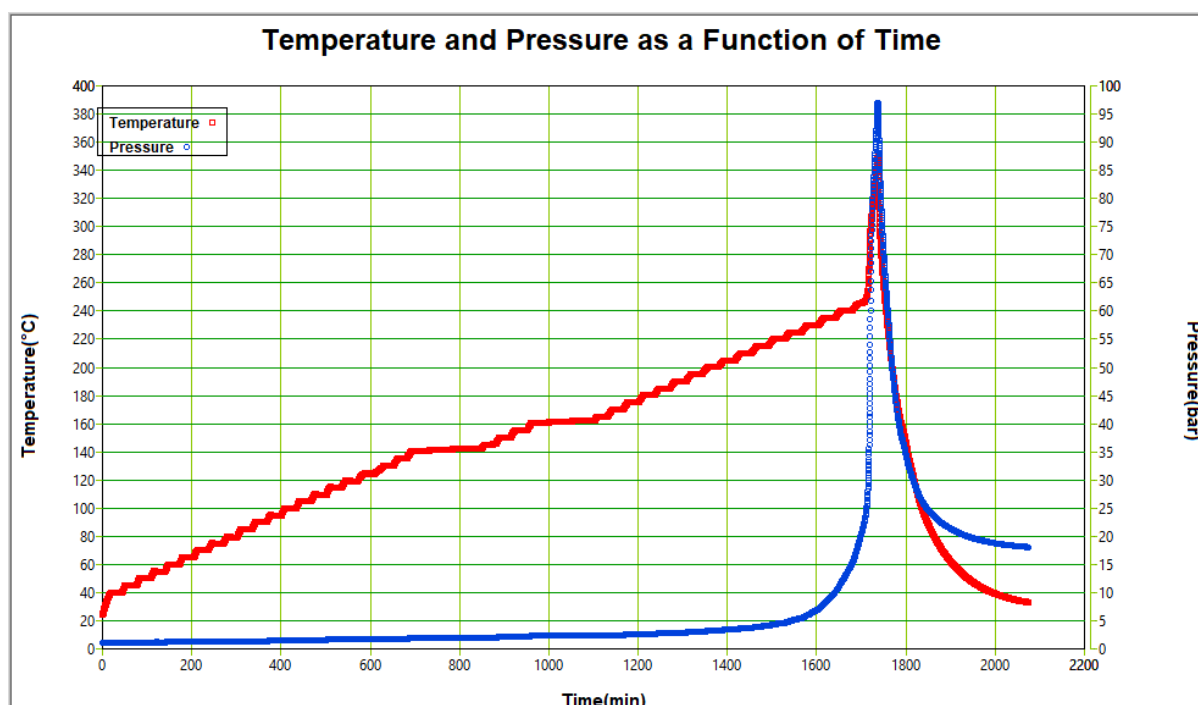

## Synthesis of 4a from 1a: reaction mixture at start, ARC

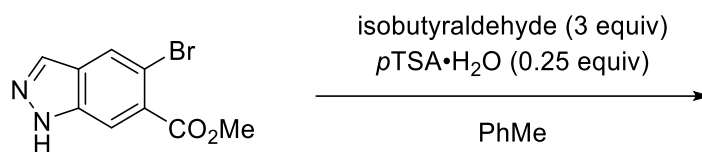

Representative sample with methyl 5-bromo-1*H*-indazole-6-carboxylate (1.0 equiv), *p*TSA·H<sub>2</sub>O (0.25 equiv), and isobutyraldehyde (3.0 equiv) in PhMe (15 mL/g).

| Thermal Onset (°C) | Max Rate (K/min) | Phi-corrected Adiabatic temp rise (K) | TMR@ temp (Phi corr) | TD24 (°C) | Gas onset from Antoine Plot (°C) | ΔP at 33 °C (bar) | Max sample temp (°C) |
|--------------------|------------------|---------------------------------------|----------------------|-----------|----------------------------------|-------------------|----------------------|
| None Detected      | N/A              | N/A                                   | N/A                  | N/A       | 235                              | +5.32             | 349                  |

Phi Factor = 1.73

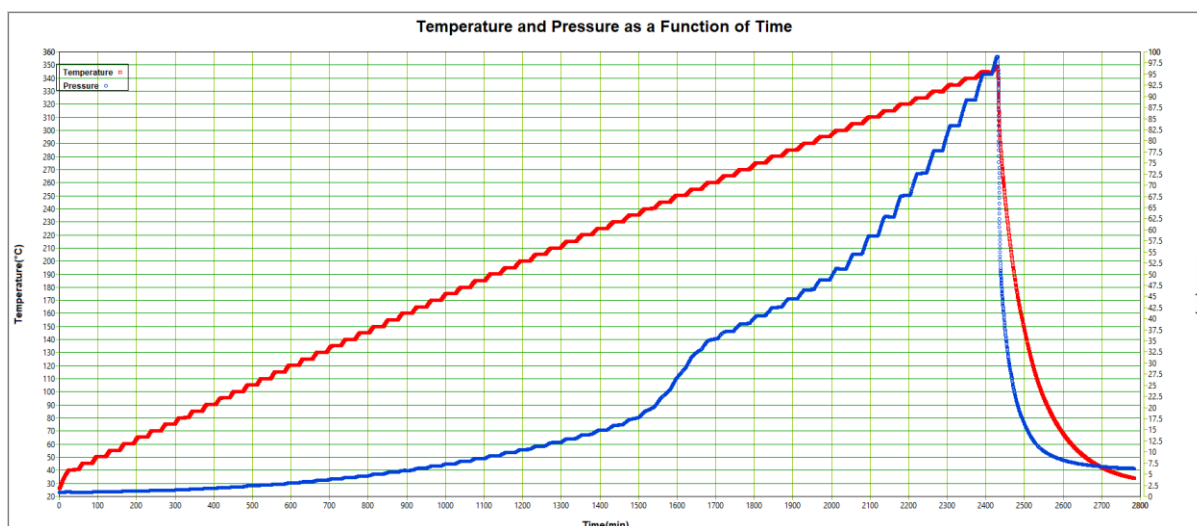

### Synthesis of 4a from 1a: reaction mixture at completion, Ramp TSU

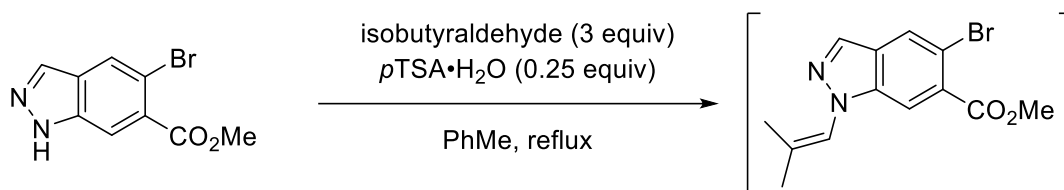

Representative sample taken after reaction completion and workup, then over concentration to *ca.* 5 mL /g.

| Thermal onset (°C) | Max $\Delta T/dt$ from exotherm (K/min) | Gas onset from Antoine Plot (°C) | $\Delta P$ at 25 °C (bar) | Max sample temp of test (°C) |
|--------------------|-----------------------------------------|----------------------------------|---------------------------|------------------------------|
| 198                | 0.15                                    | None detected                    | -0.14                     | 249                          |

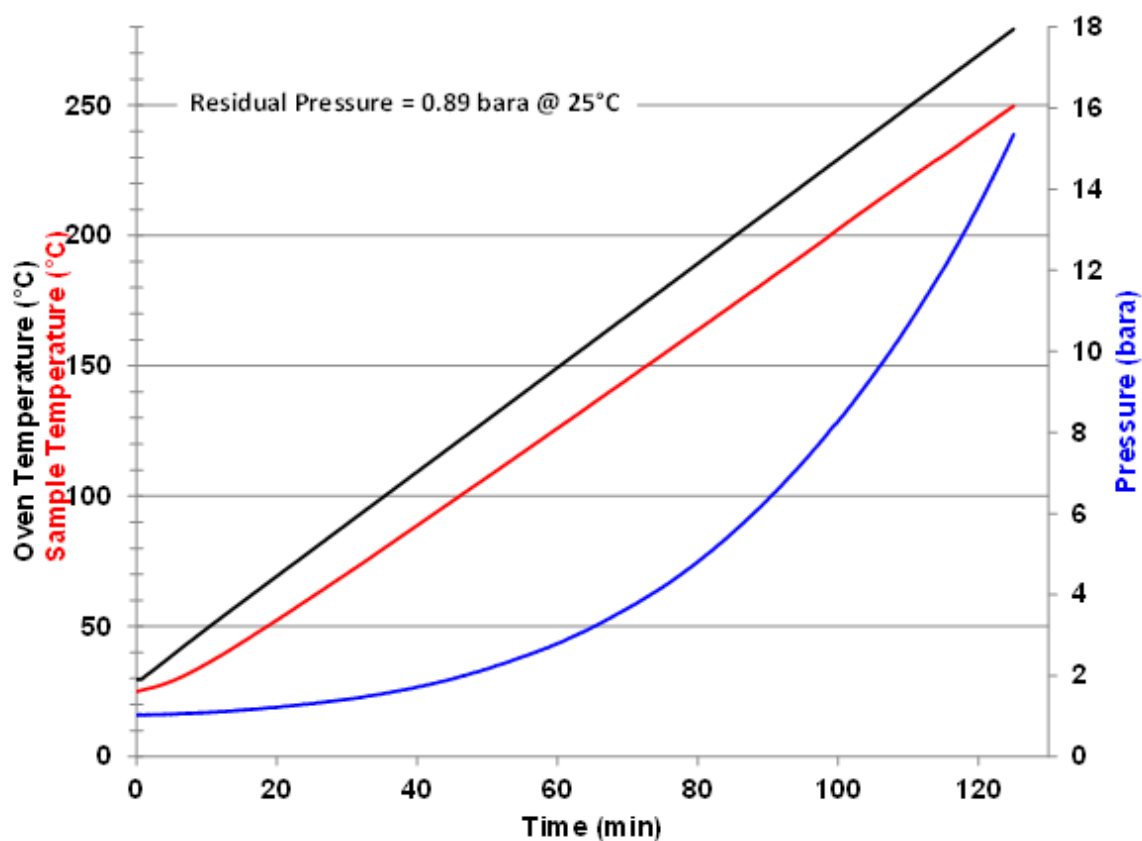

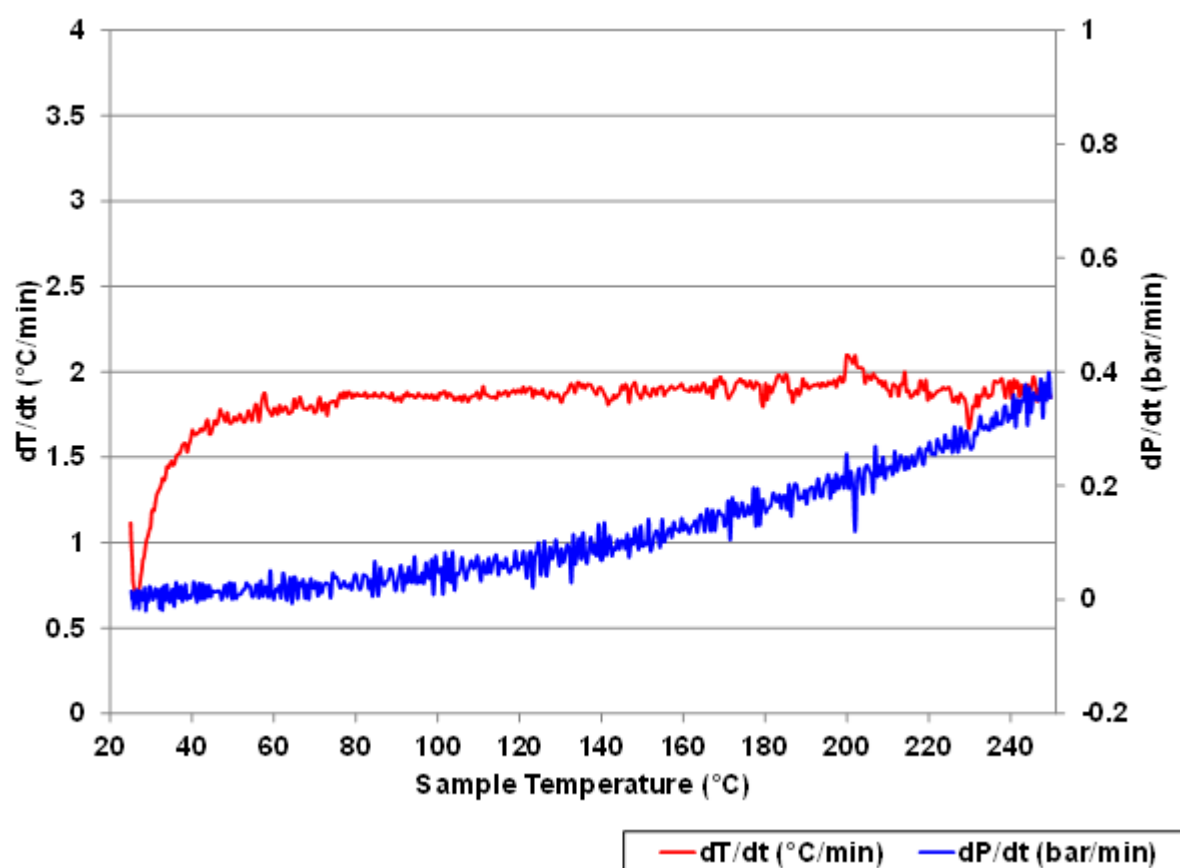

## Synthesis of 4a from 1a: reaction mixture at completion, ARC



Representative sample taken after reaction completion and held at reflux for additional 1.5 h.

| Thermal Onset (°C) | Max Rate (K/min) | Phi-corrected Adiabatic temp rise (K) | TMR@ temp (Phi corr) | TD24 (°C) | Gas onset from Antoine Plot (°C) | ΔP at 30 °C (bar) | Max sample temp (°C) |
|--------------------|------------------|---------------------------------------|----------------------|-----------|----------------------------------|-------------------|----------------------|
|--------------------|------------------|---------------------------------------|----------------------|-----------|----------------------------------|-------------------|----------------------|

|               |     |     |     |     |     |       |     |
|---------------|-----|-----|-----|-----|-----|-------|-----|
| None Detected | N/A | N/A | N/A | N/A | 232 | +2.87 | 349 |
|---------------|-----|-----|-----|-----|-----|-------|-----|

Phi Factor = 1.85

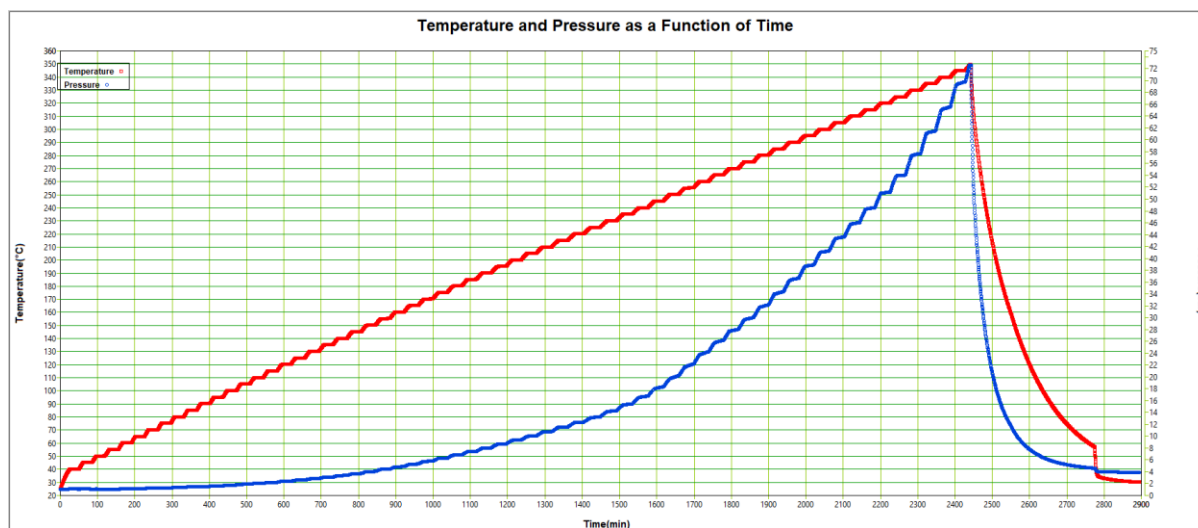

## Synthesis of 2a from 4a: reaction mixture at completion, Ramp TSU

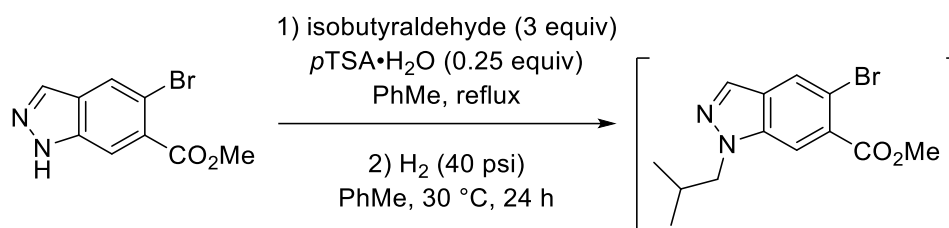

Representative sample taken after reaction completion and held at reflux for additional 1.5 h.

| Thermal onset (°C) | Max $\Delta T/dt$ from exotherm (K/min) | Gas onset from Antoine Plot (°C) | $\Delta P$ at 25 °C (bar) | Max sample temp of test (°C) |
|--------------------|-----------------------------------------|----------------------------------|---------------------------|------------------------------|
| 110                | 0.19                                    | None detected                    | 0                         | 249                          |

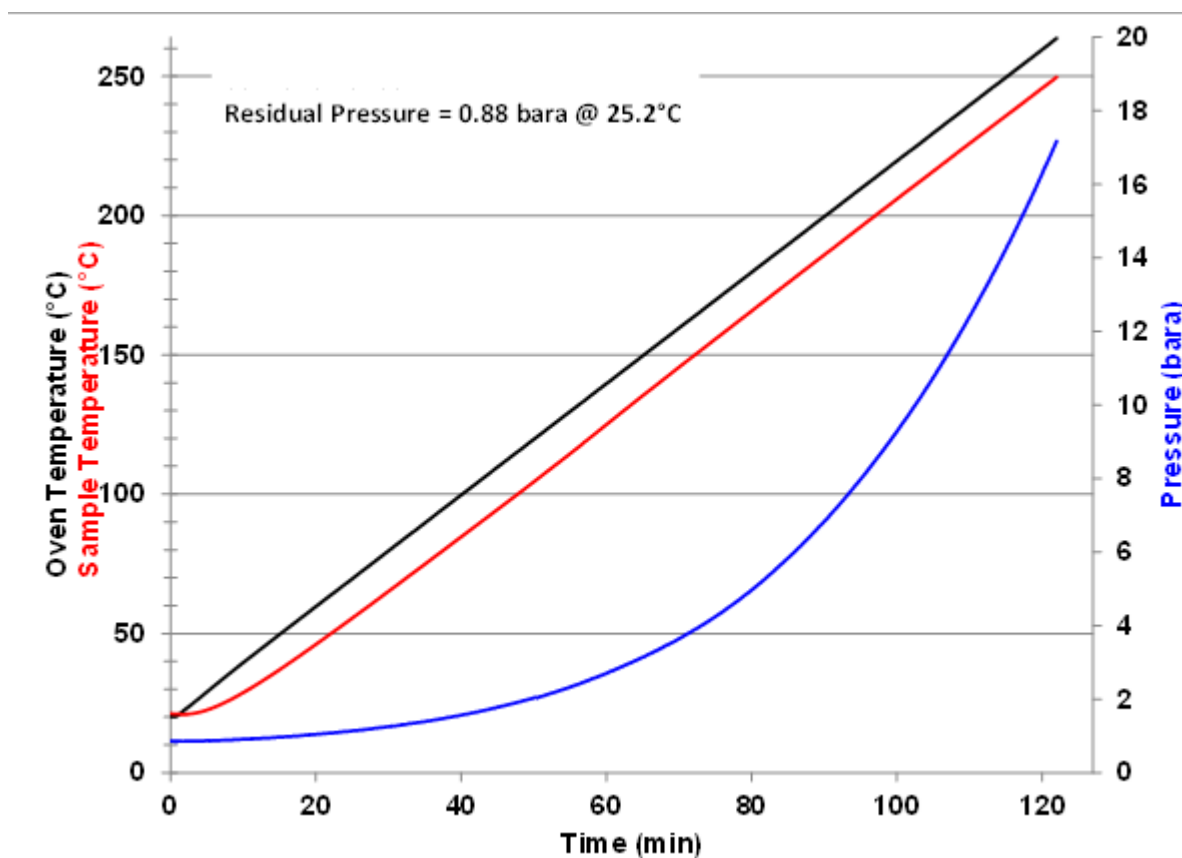

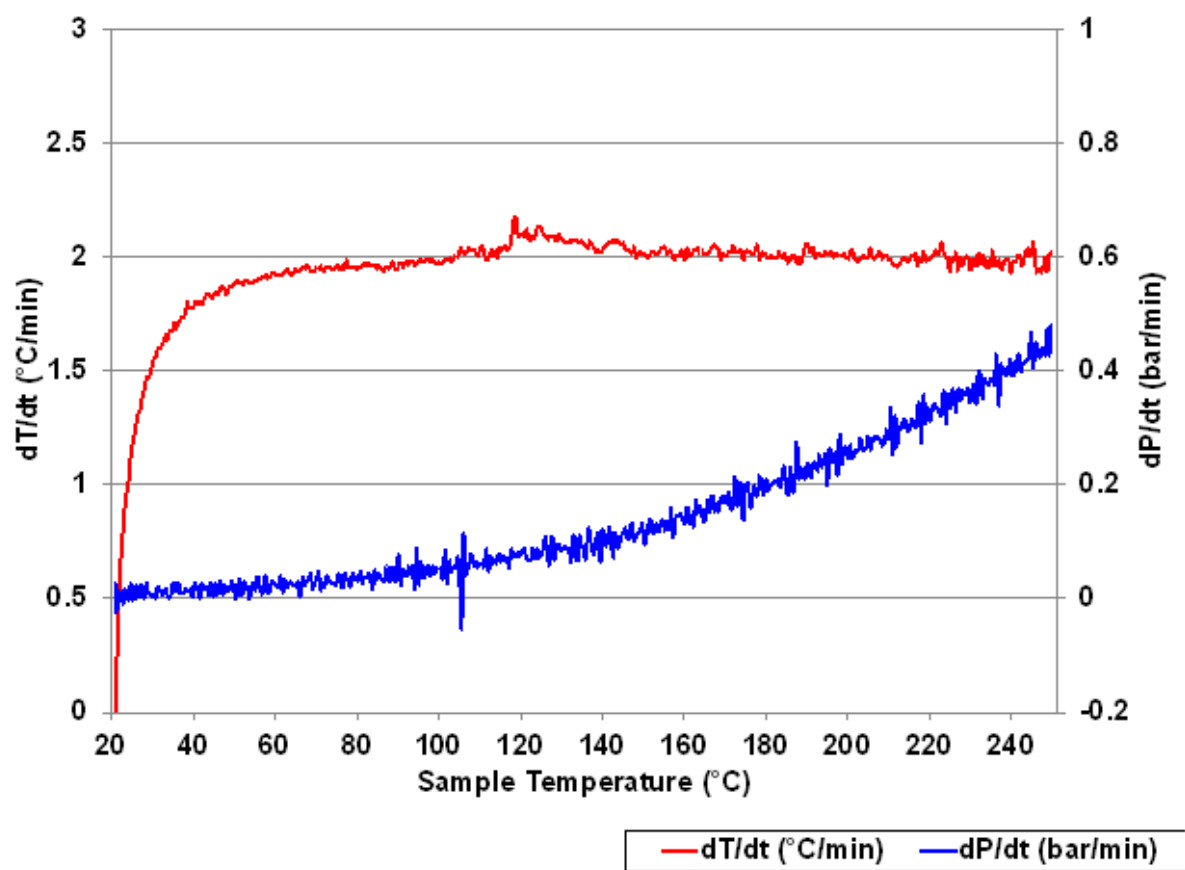



### 100 g Scale Procedure (1a·pTSA)

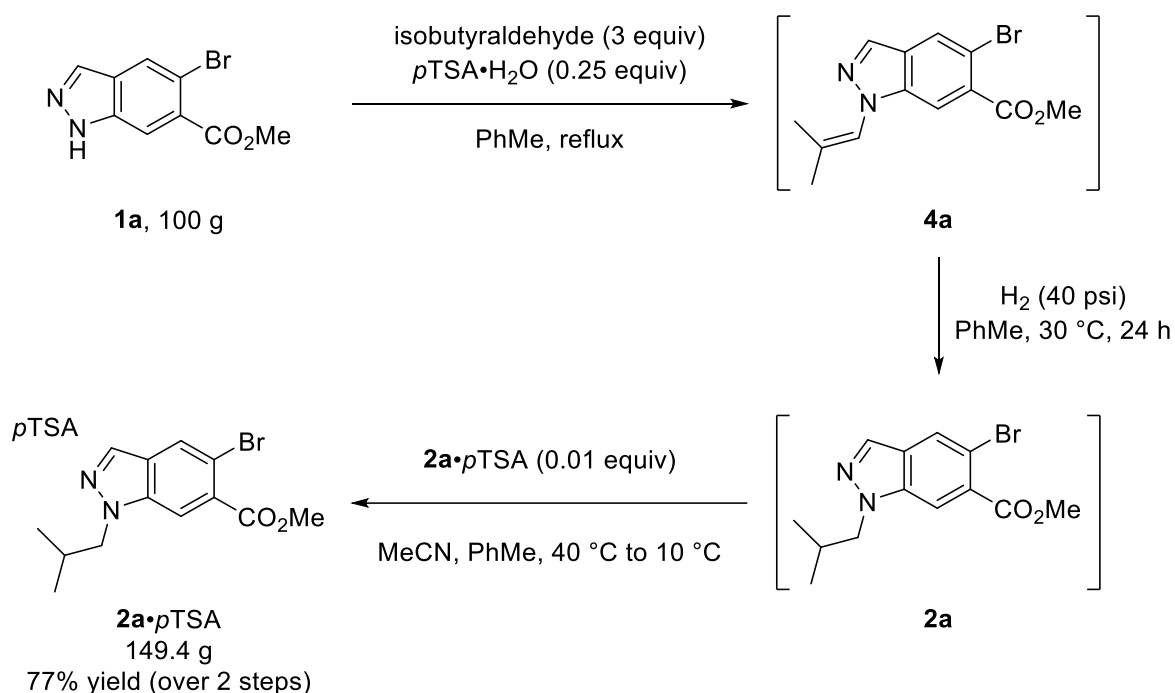

A 2 L Reactor Ready Vessel equipped with a Dean-Stark condenser was charged with methyl 5-bromo-1*H*-indazole-6-carboxylate (100.0 g, 0.392 mol, 1.0 equiv) and *p*TSA·H<sub>2</sub>O (18.6 g, 0.098 mol, 0.25 equiv). PhMe (1.5 L) was added, followed by isobutyraldehyde (107 mL, 1.18 mol, 3.0 equiv). The jacket temperature was increased to 140 °C over 2 h, then the reaction mixture was stirred at a vigorous reflux for 3 h. Triethylamine (13.7 mL, 0.098 mol, 0.25 equiv) was added dropwise subsurface. The jacket temperature was cooled to 20 °C over 2 h, then left standing overnight. The reaction mixture was transferred to a 5 L Reactor Ready. The reaction mixture was washed with H<sub>2</sub>O (400 mL) and 23% brine (400 mL). The organic layer was concentrated to *ca.* 1 L by distillation at atmospheric pressure to afford a solution of crude **4a** in PhMe.

A 5 L Type 3 Buchiglasuster reactor was charged with 5% Pt/C (19.9 g, 0.005 mol, 0.013 equiv) and crude enamine solution. The reaction mixture was stirred under an atmosphere of H<sub>2</sub> at 40 psi and 30 °C for 24 hours. The resulting reaction mixture was filtered through arbocel and washed with PhMe (300 mL) to afford a solution of crude **1a** in PhMe.

The solution of **1a** in PhMe was concentrated to *ca.* 670 mL by distillation at atmospheric pressure. MeCN (220 mL) was charged, and the reaction mixture heated to 50 °C (internal temperature) and held for 5 min. The mixture was charged with *p*TSA (83.3 g, 0.43 mol, 1.1

equiv) in a single portion. The mixture was cooled to 40 °C and held for 5 min. The mixture was seeded with **1a**·*p*TSA (2.1 g, 0.04 mol, 0.01 equiv). The slurry was held at 40 °C for 1 h, cooled to 30 °C at 0.2 °C/min, held for 30 min, heated to 40 °C at 1 °C/min, held for 1 h, cooled to 10 °C at 0.2 °C/min, then held at 10 °C overnight. The resulting solids were collected by vacuum filtration and dried on a tray in an oven to afford **1a**·(*p*TSA)<sub>1.25</sub> as an off-white solid (149.4 g, 0.284 mol, 72% yield (over 2 steps)).

**NB:** Final product contained 1.25 equiv *p*TSA by <sup>1</sup>H NMR. Characterisation otherwise consistent with **1a**·*p*TSA as reported above.

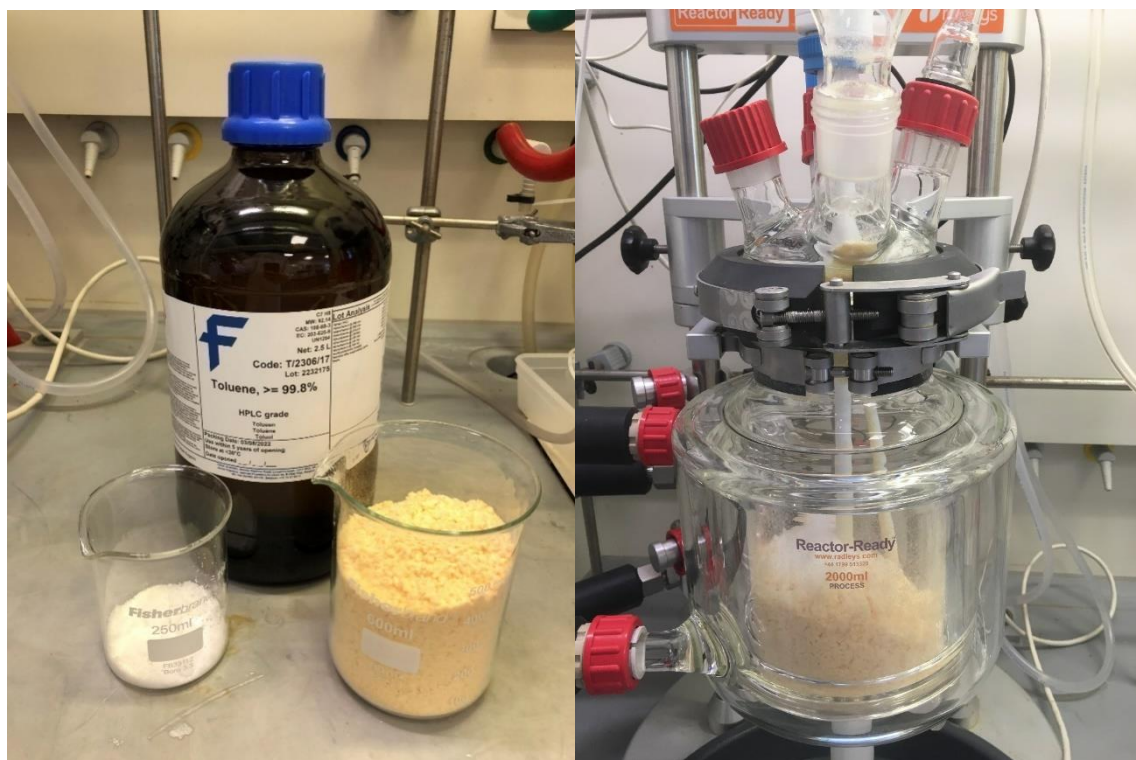

**Left:** Starting solids and solvent: *p*TSA·H<sub>2</sub>O, **1a**, and PhMe. **Right:** Solids charged into 2 L reactor ready vessel.

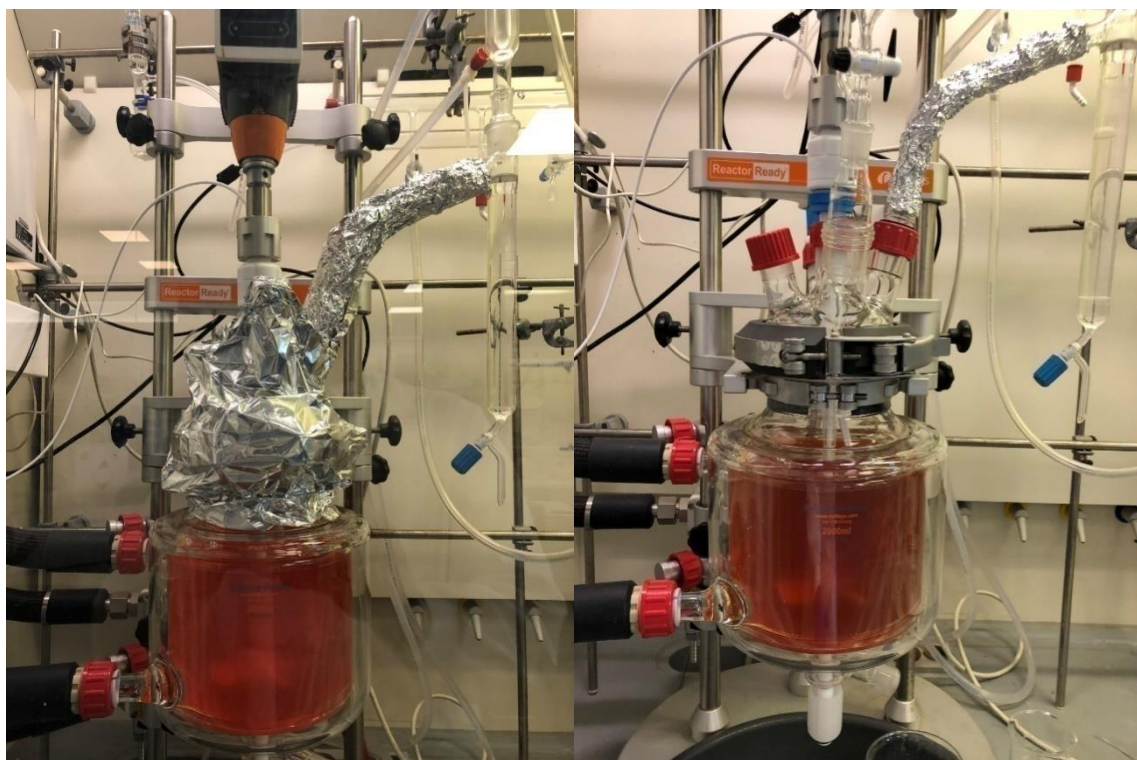

**Left:** Reaction mixture equipped with Dean-Stark condenser. **Right:** Subsurface  $\text{Et}_3\text{N}$  addition with dropping funnel and feed tube.

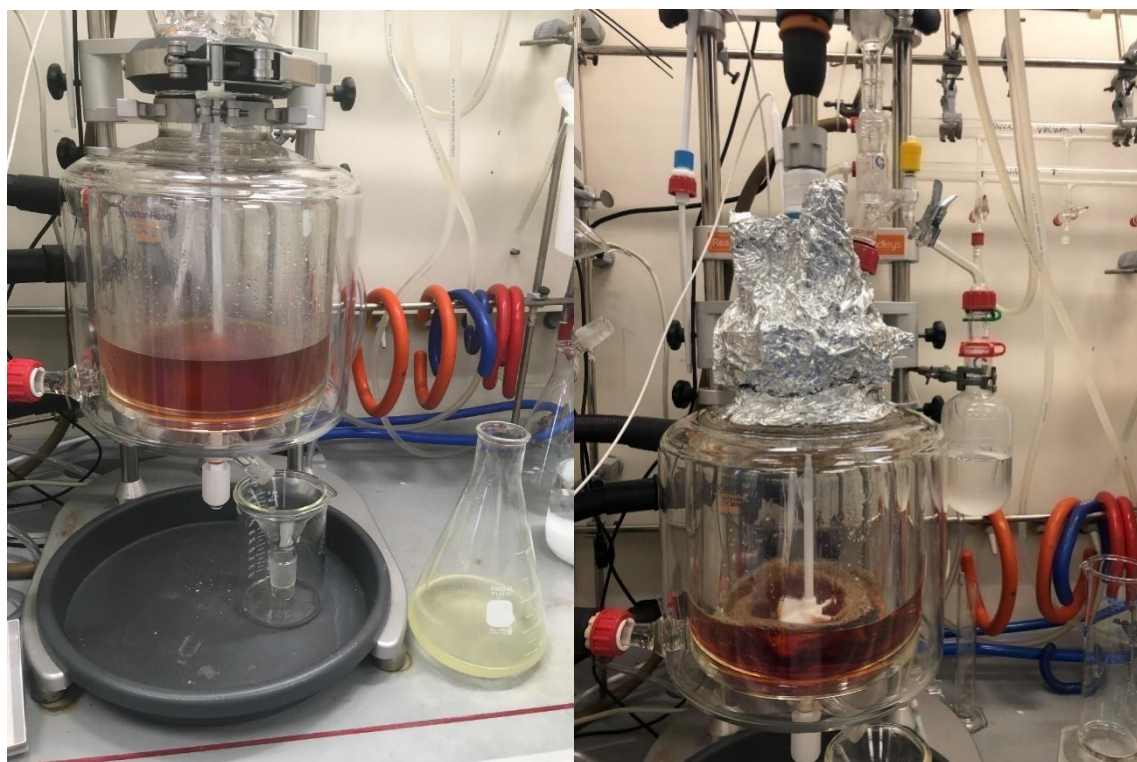

**Left:** Reaction mixture in 5 L Reactor Ready, after  $\text{H}_2\text{O}$  wash. **Right:** Reaction mixture atmospheric distillation down to *ca.* 1 L.

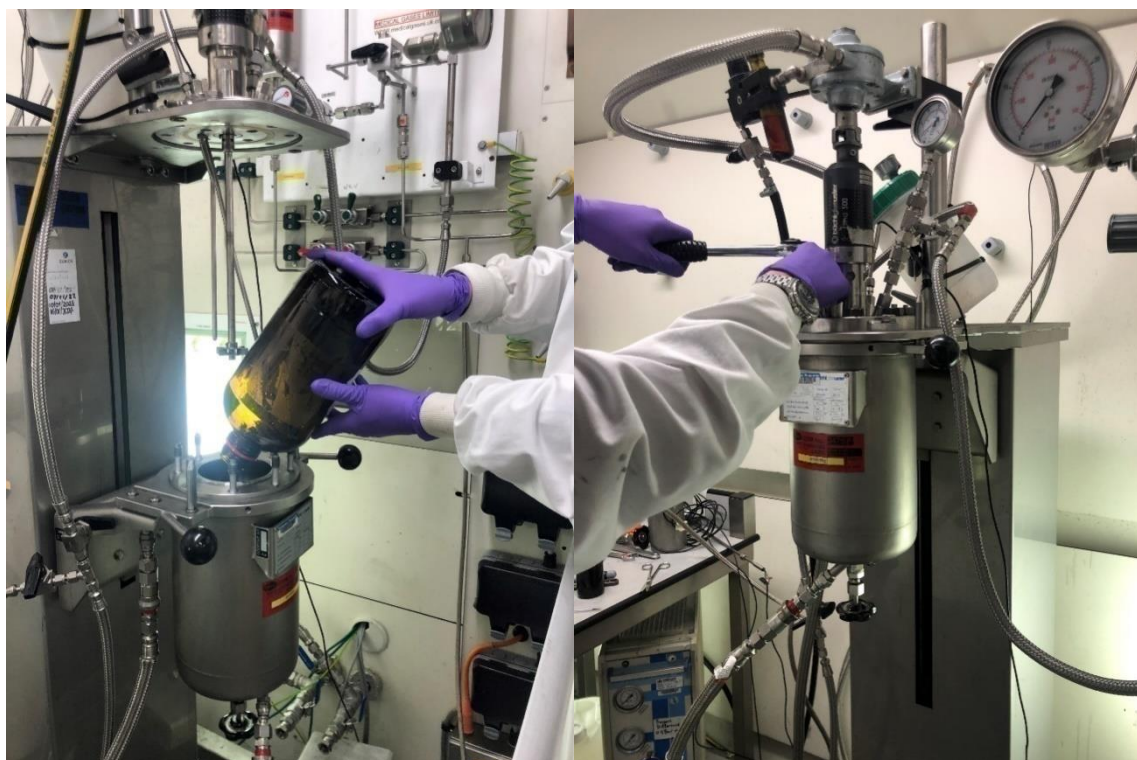

**Left:** Hydrogenation reactor charged with reaction mixture. **Right:** Hydrogenation reactor closure during set-up.

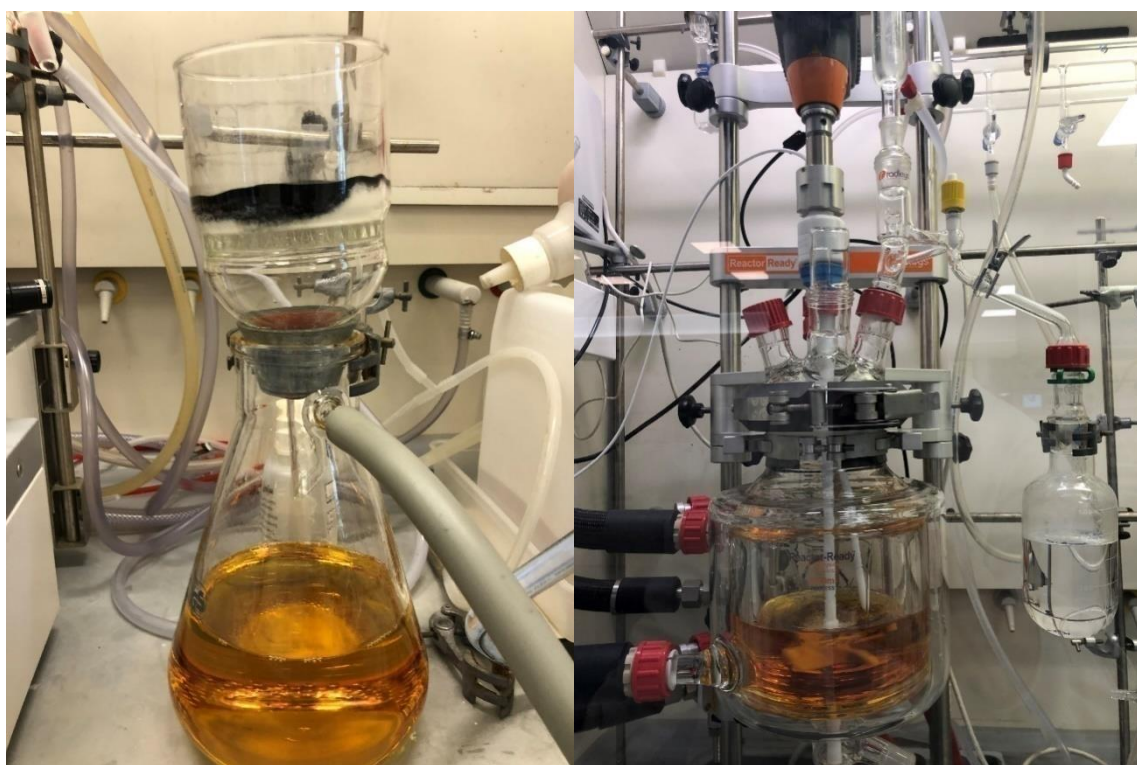

**Left:** Catalyst removal by filtration over arboce under  $N_2$ . **Right:** Distillation of liquors down to ca. 670 mL.

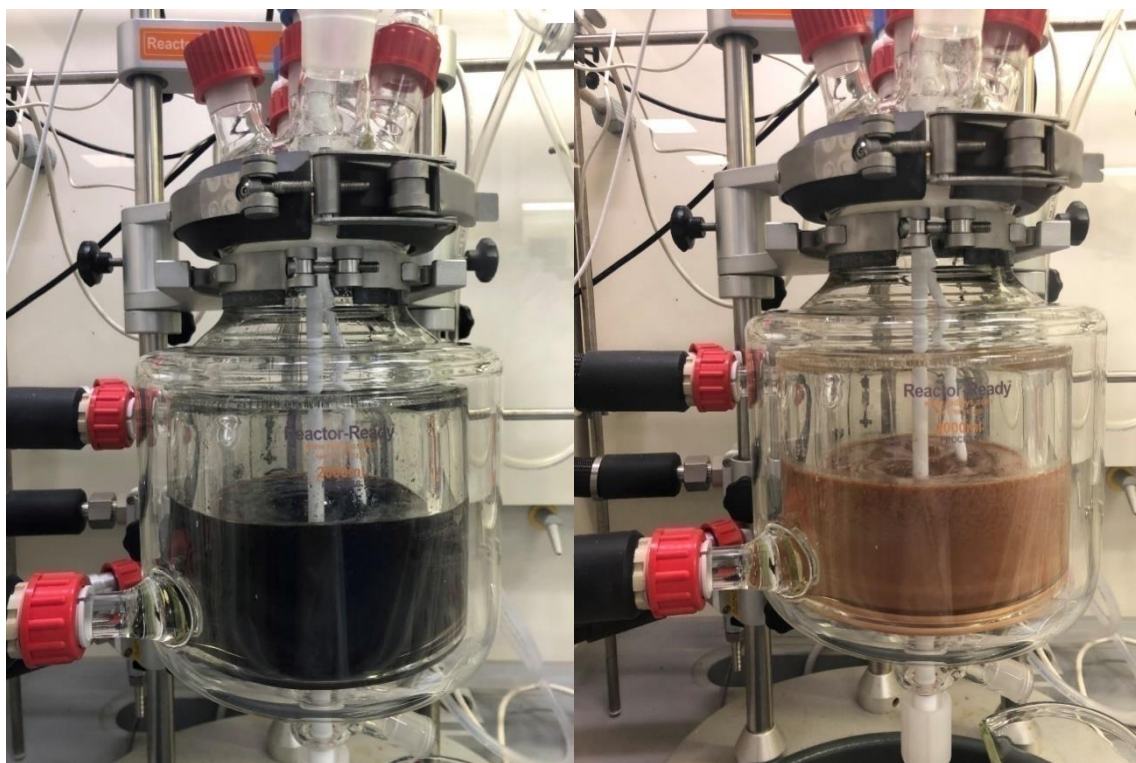

**Left:** Mixture upon addition of MeCN. **Right:** Mixture once seeded.

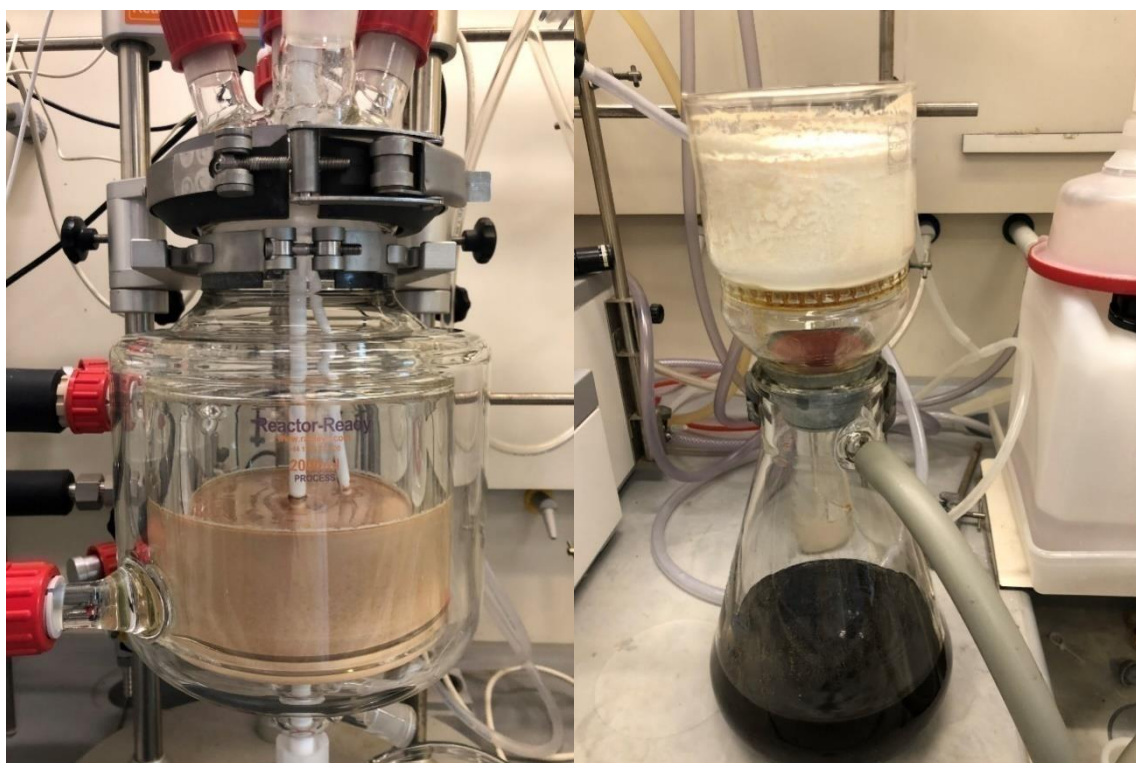

**Left:** Mixture at 10 °C after crystallization. **Right:** Collection of product by vacuum filtration.

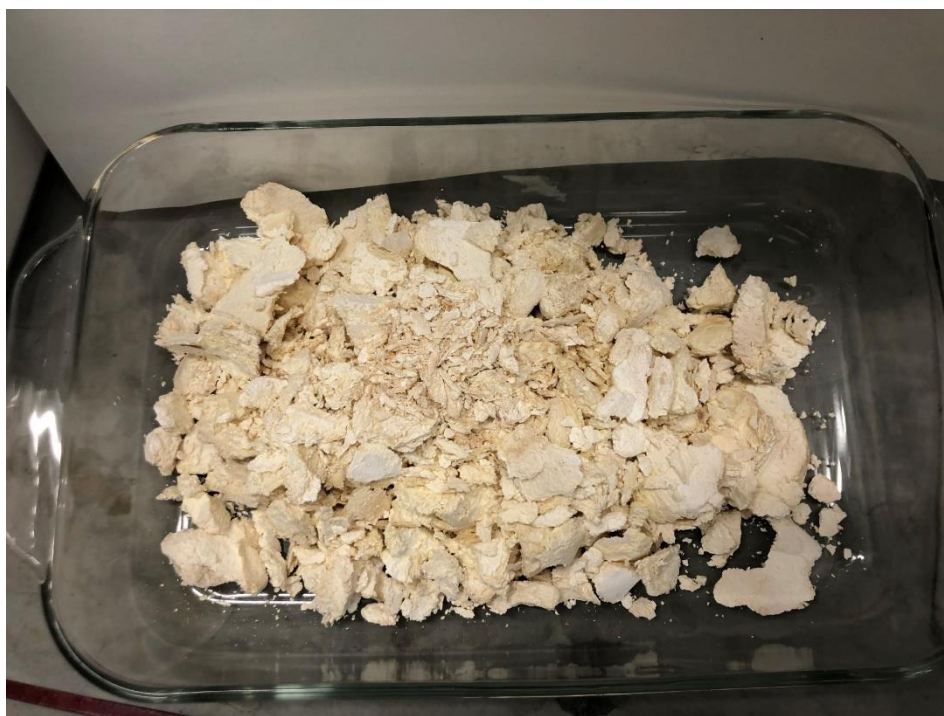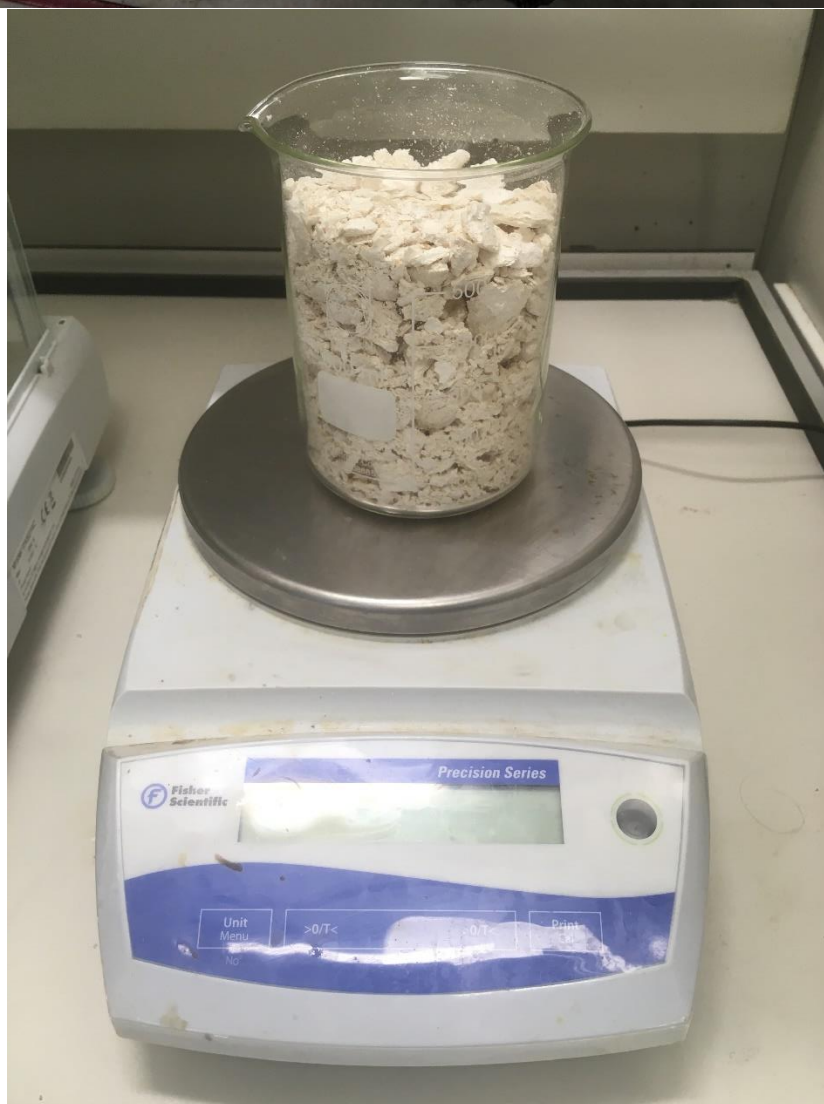

**Top:** Product tray drying. **Bottom:** Final product in 500 mL beaker.

## PMI estimations

PMI estimations used an adapted PMI calculation tool from the ACS Green Chemistry Institute.

### General Procedure (1a)

|                                   | Value | Units        |
|-----------------------------------|-------|--------------|
| Assay Batch Size (input pure)     | 2.0   | g            |
| Assay Kg product (output pure)    | 1.9   | g            |
| <b>Reagents</b>                   |       |              |
| pTSA·H <sub>2</sub> O             | 0.38  | g            |
| isobutryaldehyde                  | 1.70  | g            |
| Et <sub>3</sub> N                 | 0.20  |              |
| Pt/C (5%)                         | 0.40  | g            |
| <b>Solvents</b>                   |       |              |
| Toluene (reaction)                | 26.1  | g            |
| Toluene (wash)                    | 17.2  | g            |
| Toluene (reaction)                | 17.4  | g            |
| Toluene (1st wash)                | 5.3   | g            |
| Toluene (2nd wash)                | 17.4  | g            |
| Ethyl acetate (column)            | 500.0 | g            |
| Heptane (column)                  | 500.0 | g            |
| <b>Aqueous</b>                    |       |              |
| H <sub>2</sub> O                  | 8.0   | g            |
| 1M HCl                            | 8.0   | g            |
| NaCl(aq)                          | 8.0   | g            |
| MgSO <sub>4</sub>                 | 5.0   | g            |
| <b>Metrics</b>                    |       |              |
| Mass Substrate (g)                |       | 2            |
| Mass Reagents (g)                 |       | 3            |
| Mass Solvents (g)                 |       | 1083         |
| Mass Aqueous (g)                  |       | 29           |
| <b>PMI</b>                        |       | <b>588.0</b> |
| PMI Substrate, Reagents, Solvents |       | 572.7        |
| PMI Substrates and Reagents       |       | 2.5          |
| PMI Solvents                      |       | 570.3        |
| PMI Water                         |       | 15.3         |

## 100 g Scale Procedure (1a·pTSA)

|                                   | Value          | Units       |
|-----------------------------------|----------------|-------------|
| Assay Batch Size (input pure)     | 100.0          | g           |
| Assay Kg product (output pure)    | 136.4          | g           |
| <b>Reagents</b>                   |                |             |
| pTSA·H <sub>2</sub> O             | 18.60          | g           |
| isobutryaldehyde                  | 84.81          | g           |
| Et <sub>3</sub> N                 | 8.83           |             |
| Pt/C (5%)                         | 19.89          |             |
| pTSA·H <sub>2</sub> O             | 83.3           |             |
| seed                              | 2.1            | g           |
| <b>Solvents</b>                   |                |             |
| Toluene (reaction)                | 1306.5         | g           |
| Toluene (reactor wash)            | 261.3          | g           |
| MeCN (cryst)                      | 172.3          | g           |
| Toluene (cake wash)               | 174.2          | g           |
| <b>Aqueous</b>                    |                |             |
| H <sub>2</sub> O                  | 400.0          | g           |
| NaCl(aq)                          | 475.6          | g           |
|                                   |                |             |
|                                   | <b>Metrics</b> |             |
| Mass Substrate (g)                |                | 100         |
| Mass Reagents (g)                 |                | 218         |
| Mass Solvents (g)                 |                | 1914        |
| Mass Aqueous (g)                  |                | 876         |
| <b>PMI</b>                        |                | <b>22.8</b> |
| PMI Substrate, Reagents, Solvents |                | 16.4        |
| PMI Substrates and Reagents       |                | 2.3         |
| PMI Solvents                      |                | 14.0        |
| PMI Water                         |                | 6.4         |

## NMR Spectra of Products

**Methyl 5-bromo-2-isobutyl-1*H*-indazole-6-carboxylate (2a)**

**<sup>1</sup>H NMR (400 MHz, CDCl<sub>3</sub>)**

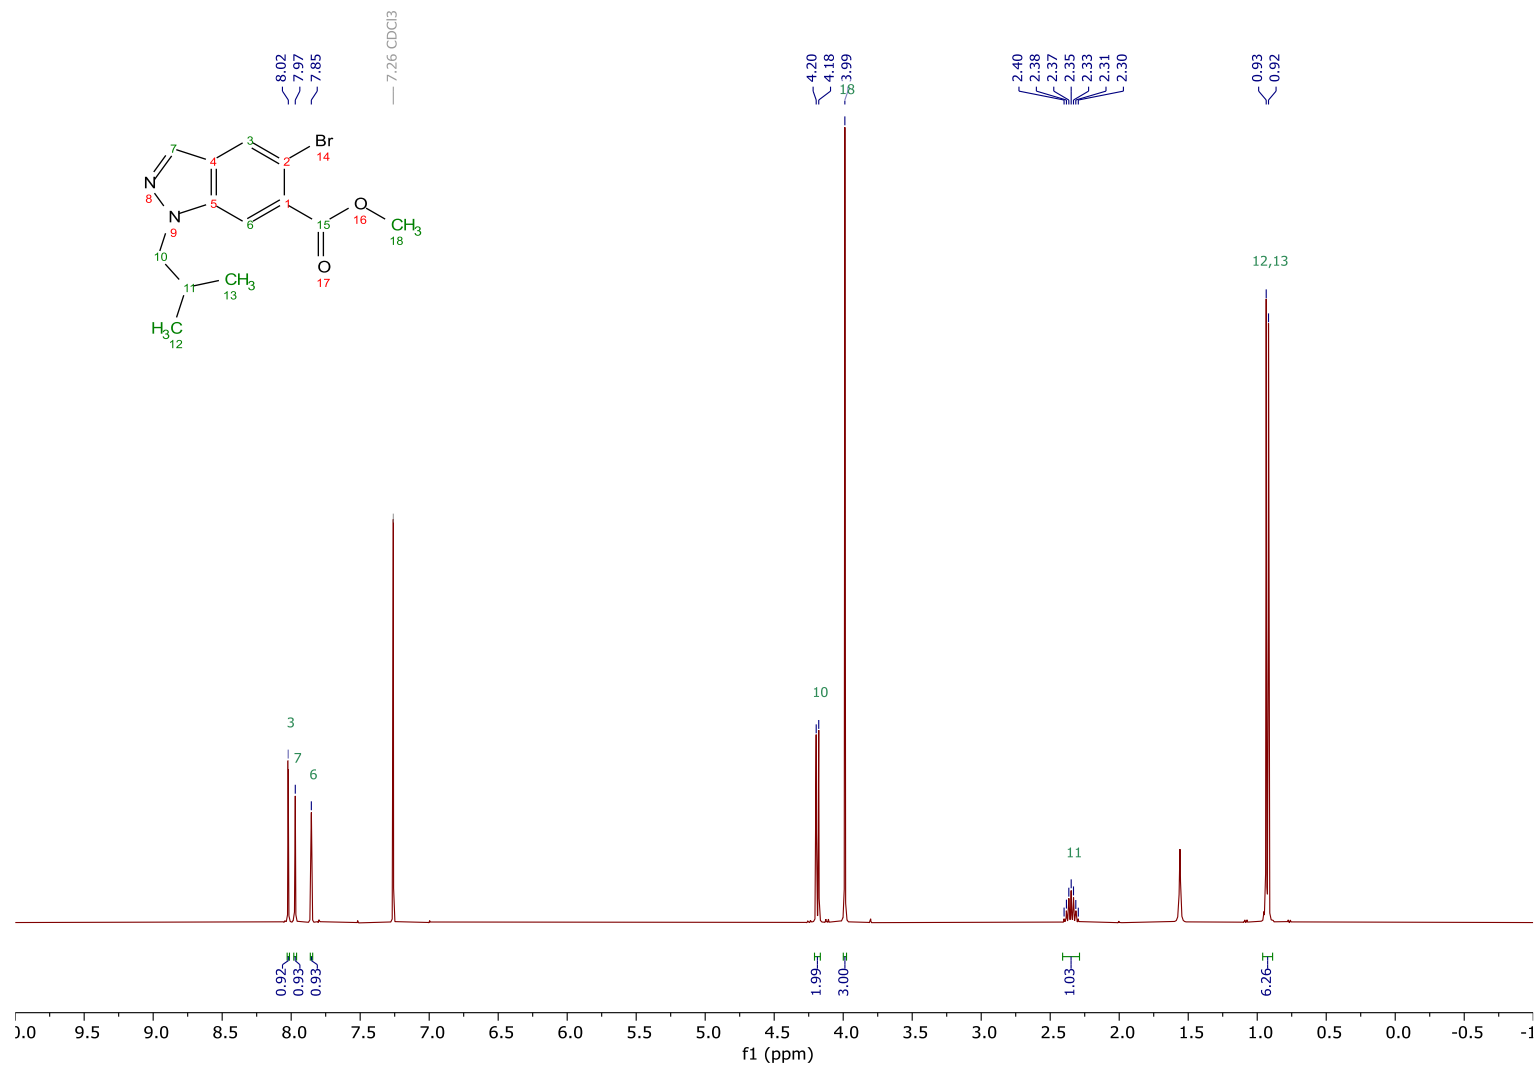

**$^{13}\text{C}$  NMR (101 MHz,  $\text{CDCl}_3$ )**

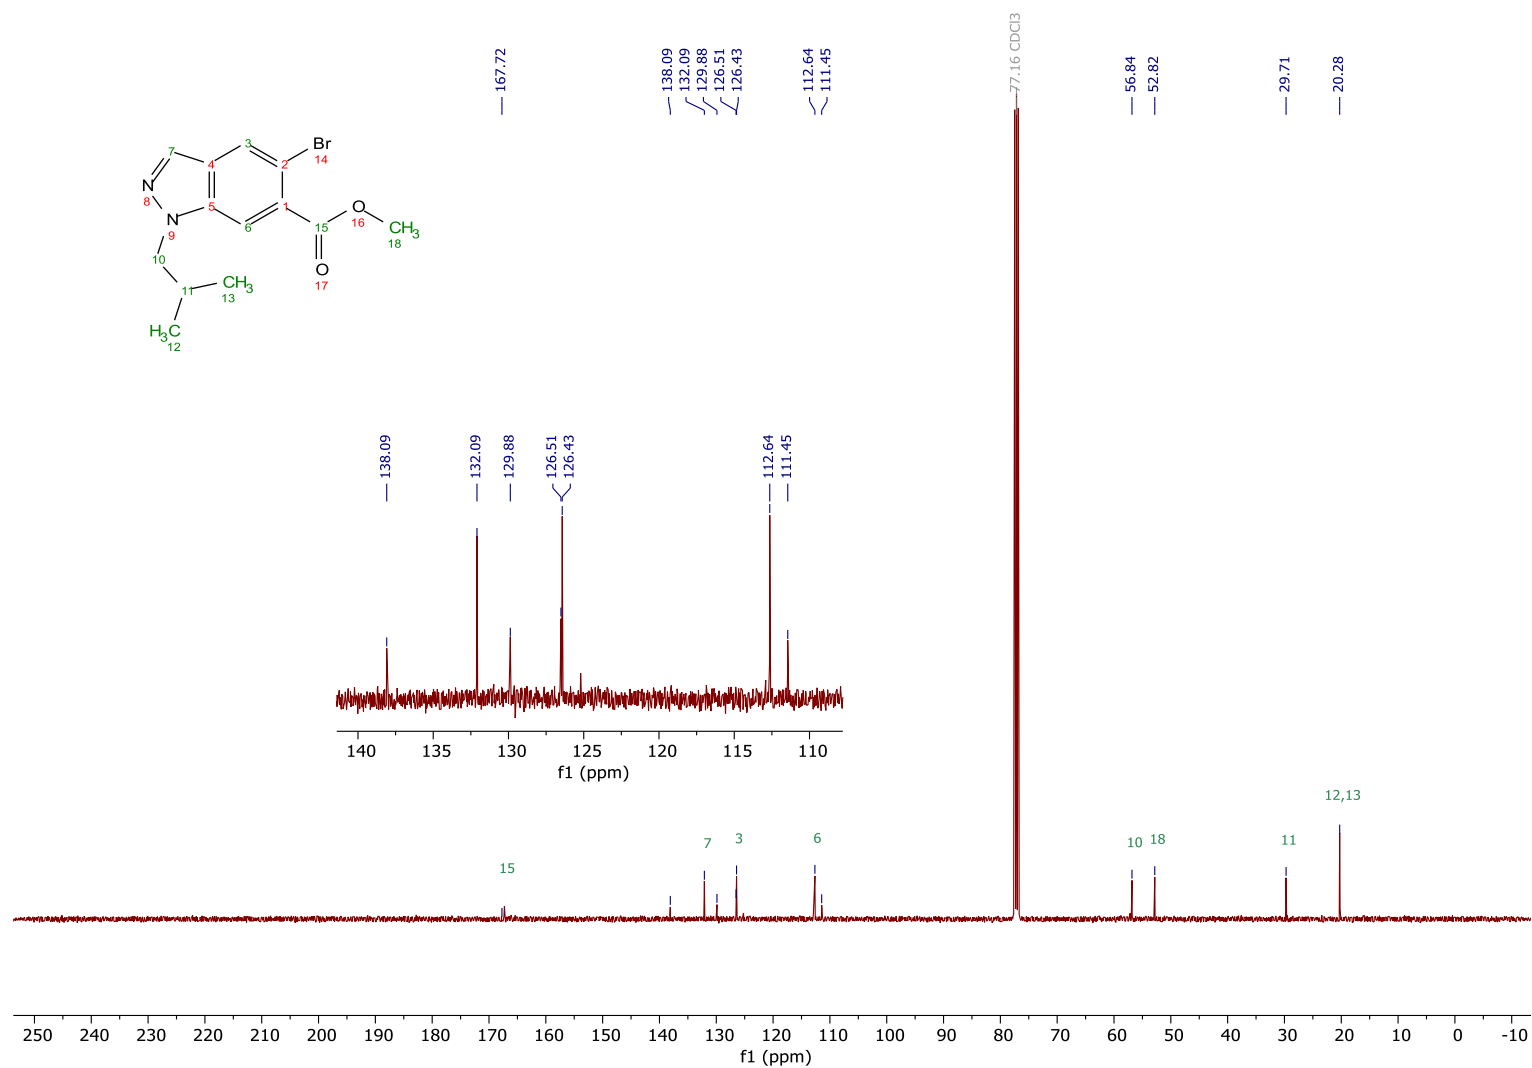

$^1\text{H}$ - $^{13}\text{C}$  HMBC ( $\text{CDCl}_3$ )

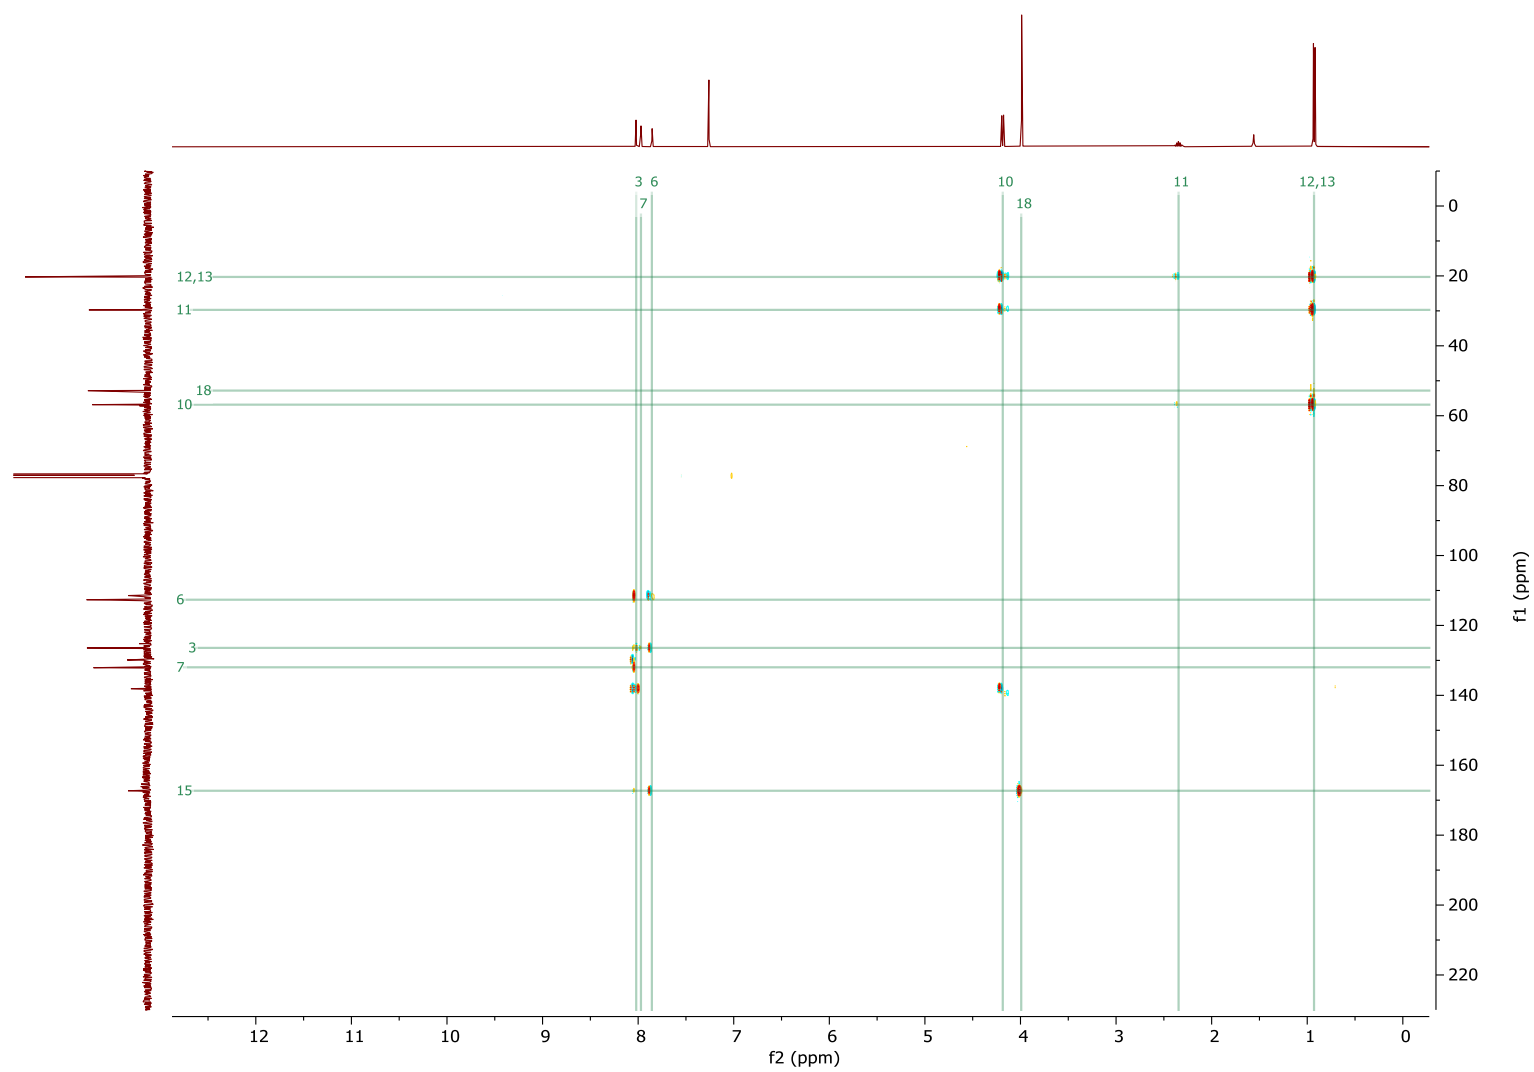

$^1\text{H}$ - $^1\text{H}$  NOESY (400 MHz,  $\text{CDCl}_3$ )

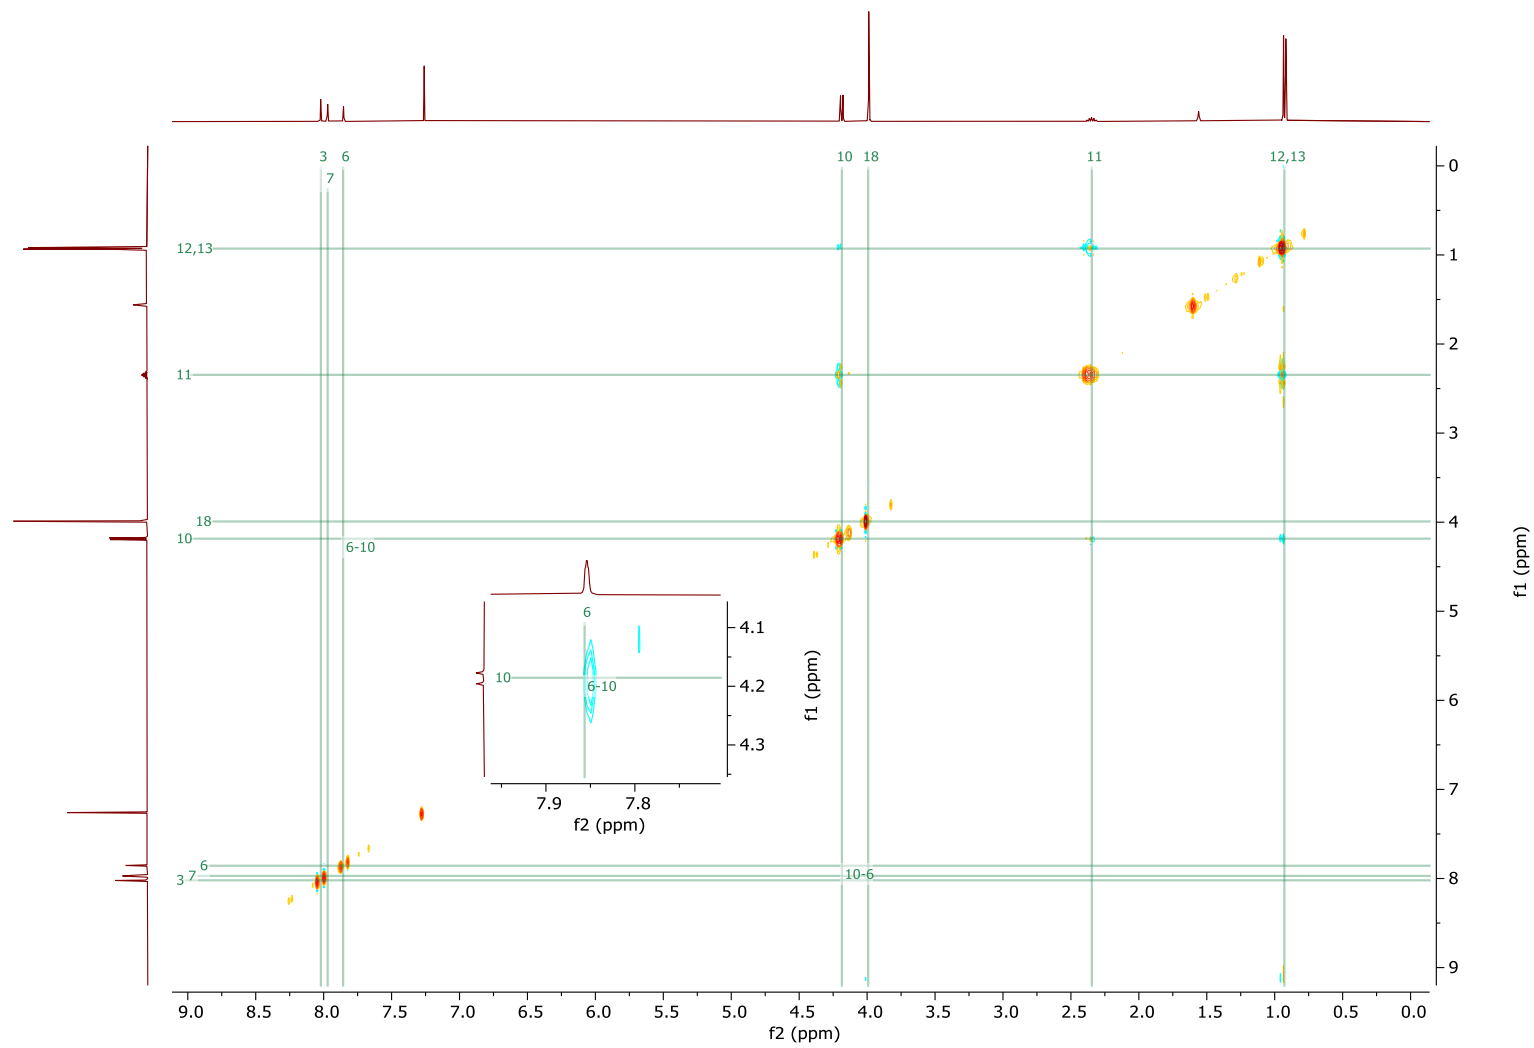

### 1-isobutyl-1*H*-indazole (2b)

<sup>1</sup>H NMR (400 MHz, DMSO-*d*<sub>6</sub>)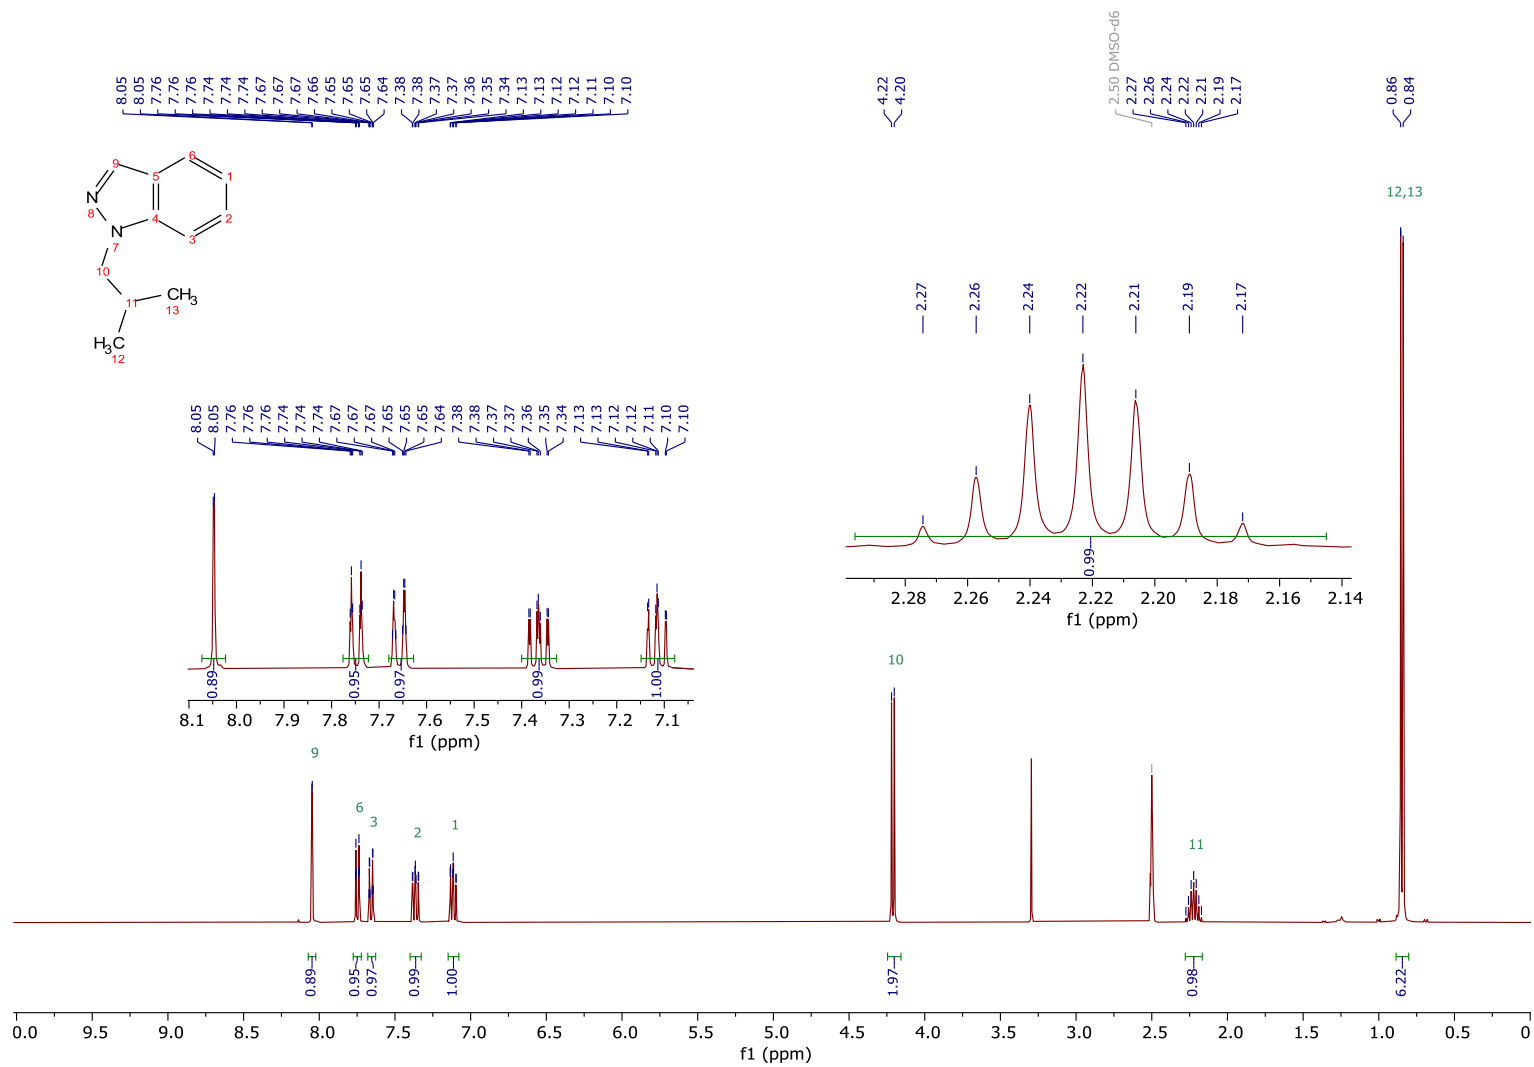

**$^{13}\text{C}$  NMR (101 MHz, DMSO- $d_6$ )**

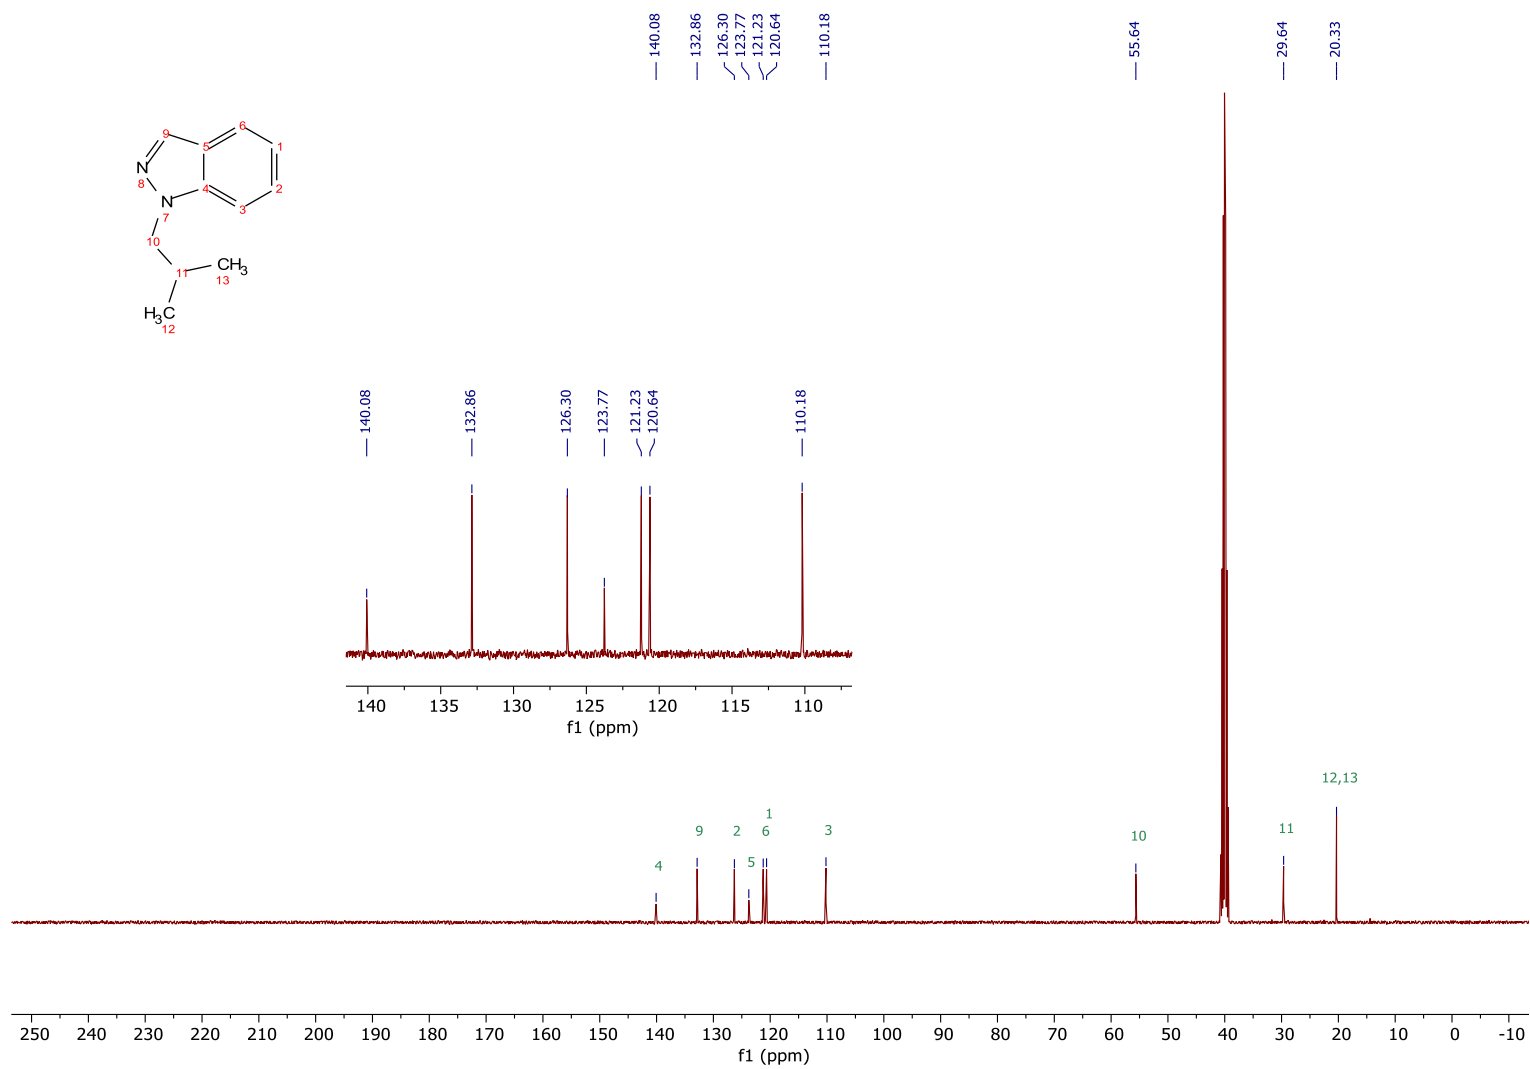

$^1\text{H}$ - $^{13}\text{C}$  HSQC (DMSO- $d_6$ )

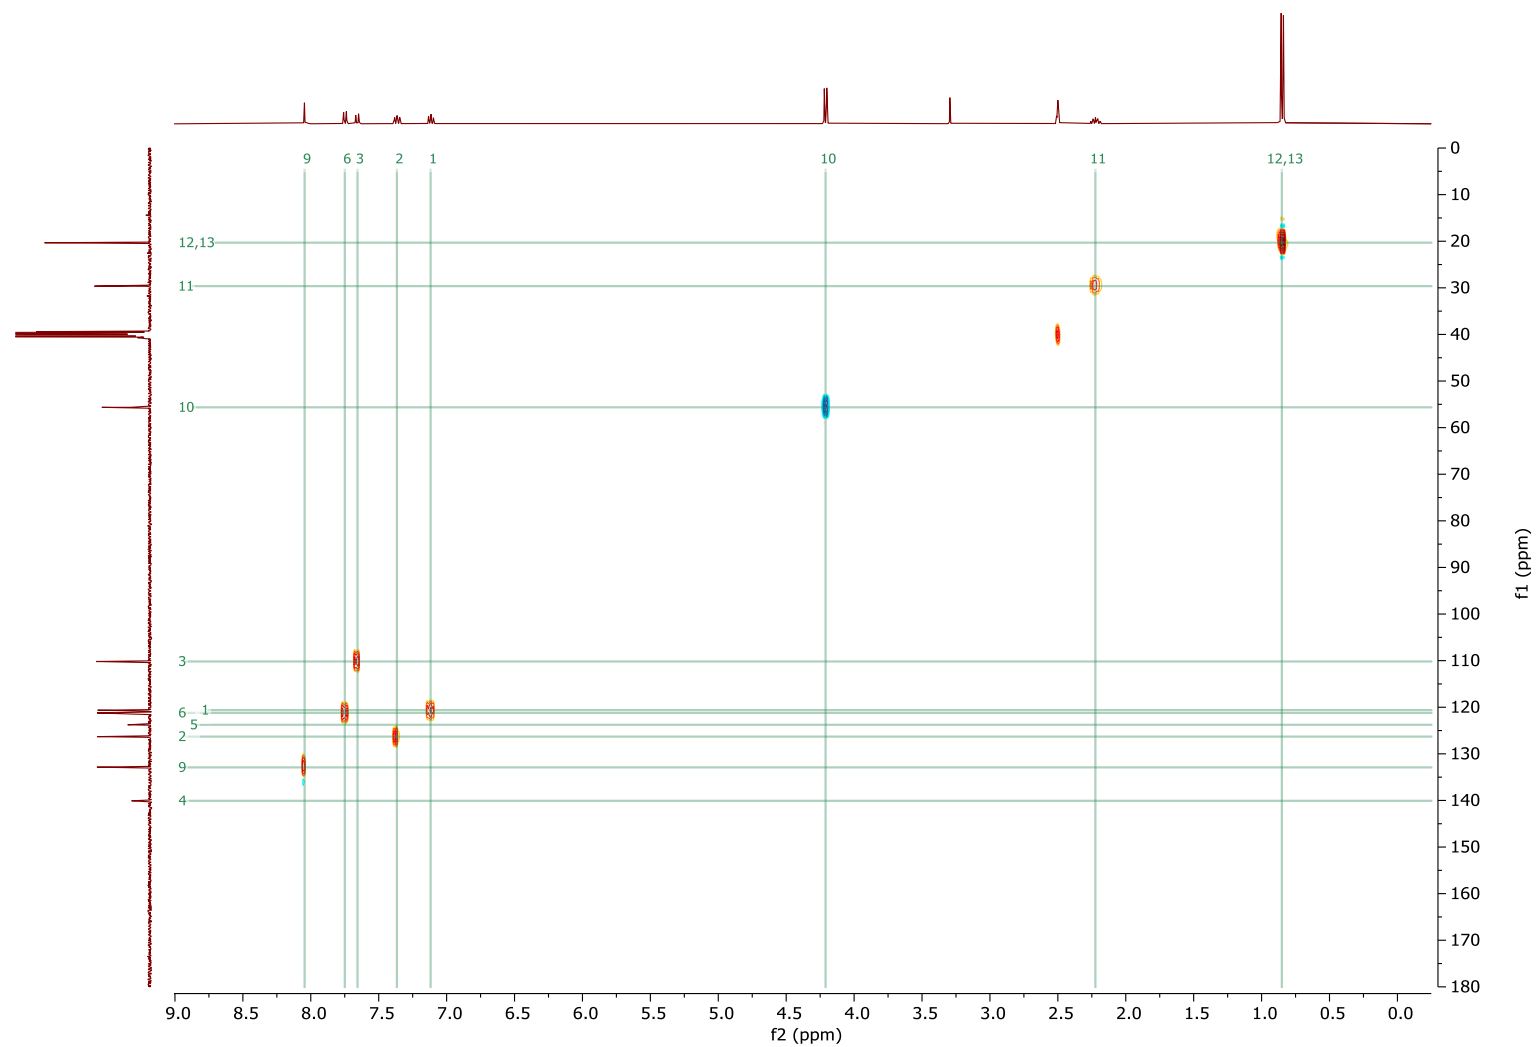

$^1\text{H}$ - $^{13}\text{C}$  HMBC (DMSO- $d_6$ )

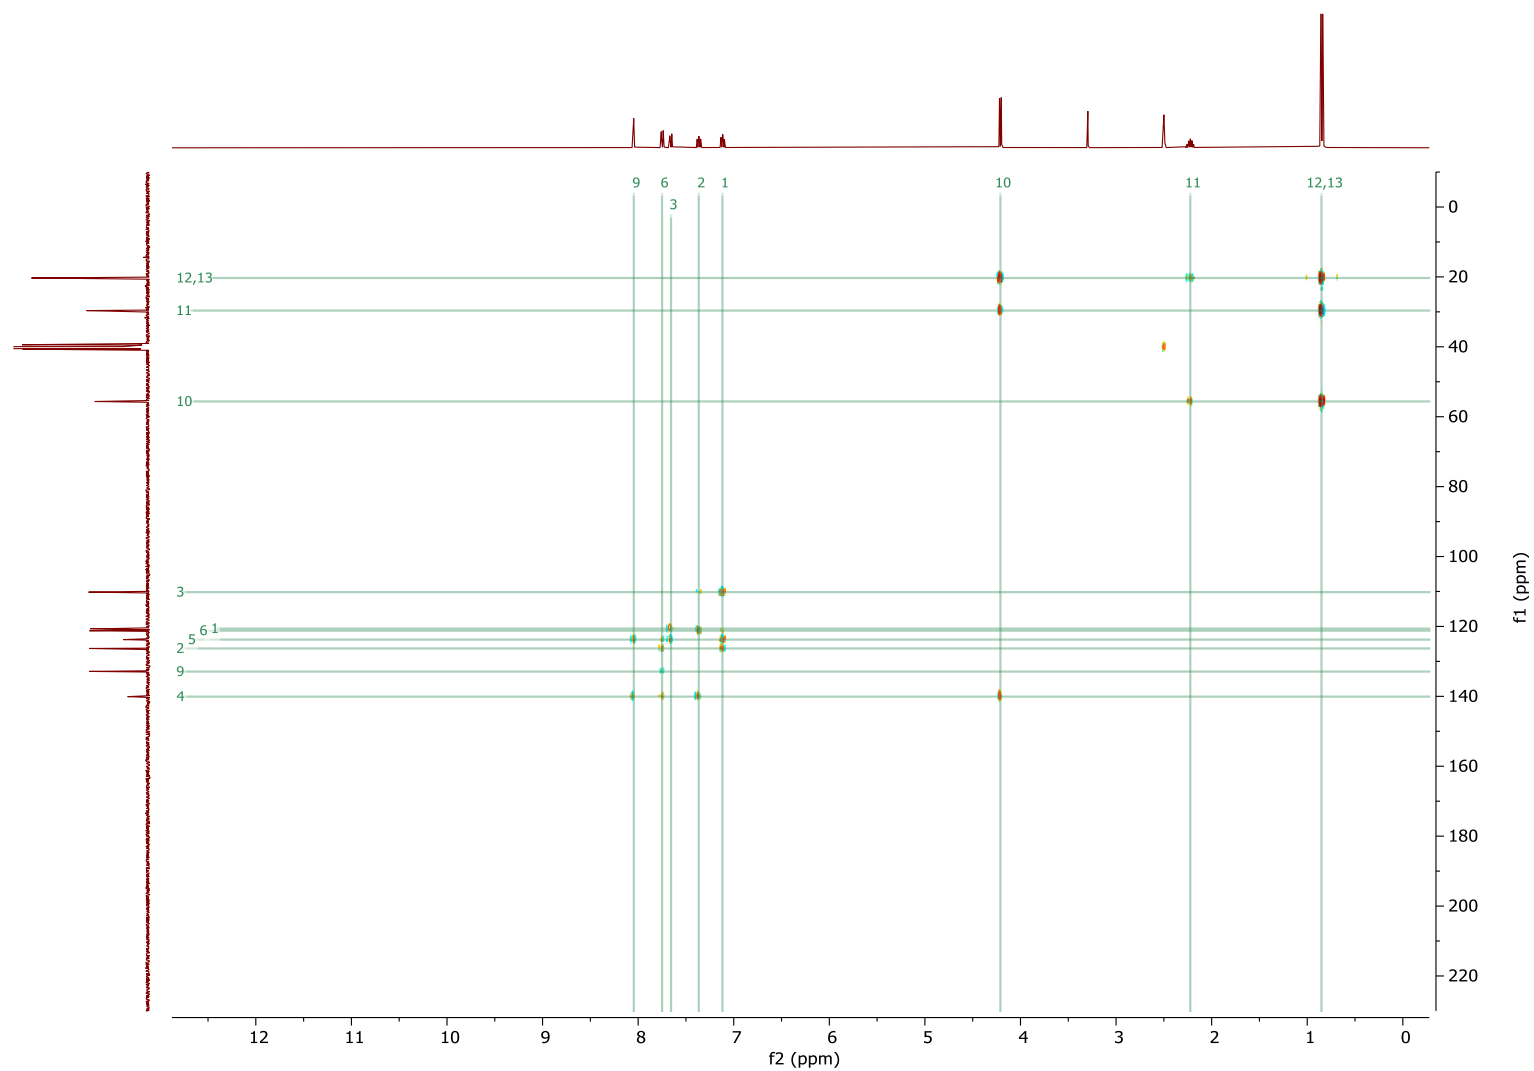

$^1\text{H}$ - $^1\text{H}$  NOESY (400 MHz, DMSO- $d_6$ )

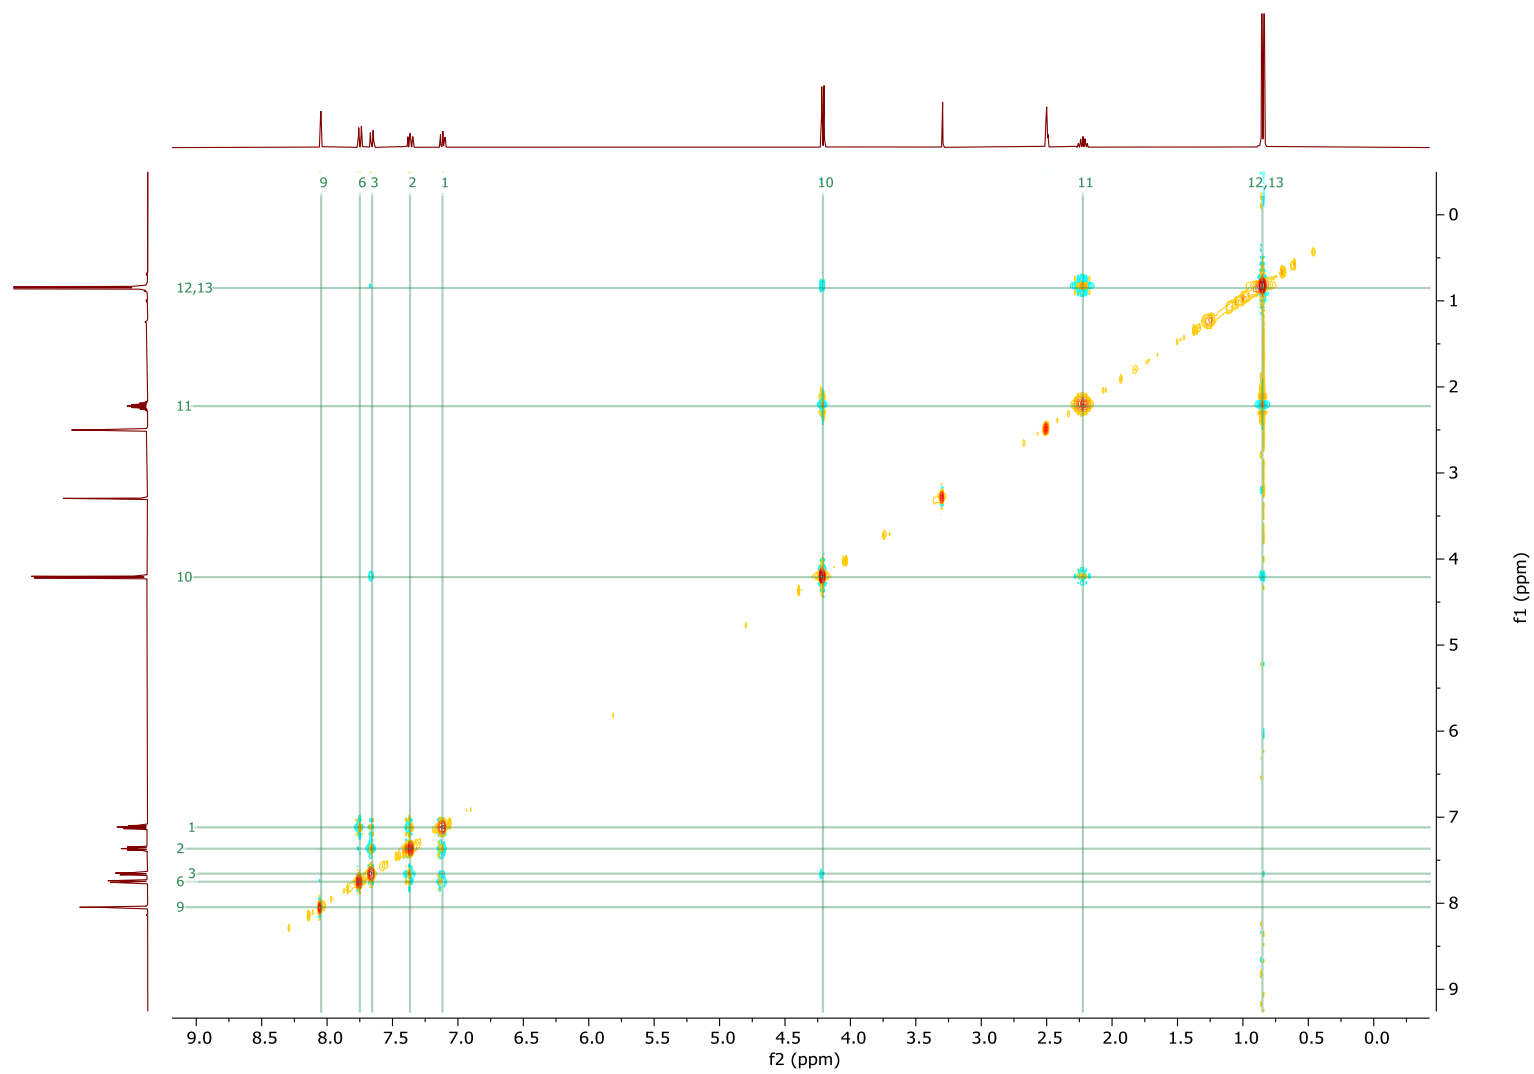

# Methyl 1-isobutyl-1*H*-indazole-3-carboxylate (2c)

<sup>1</sup>H NMR (400 MHz, DMSO-*d*<sub>6</sub>)

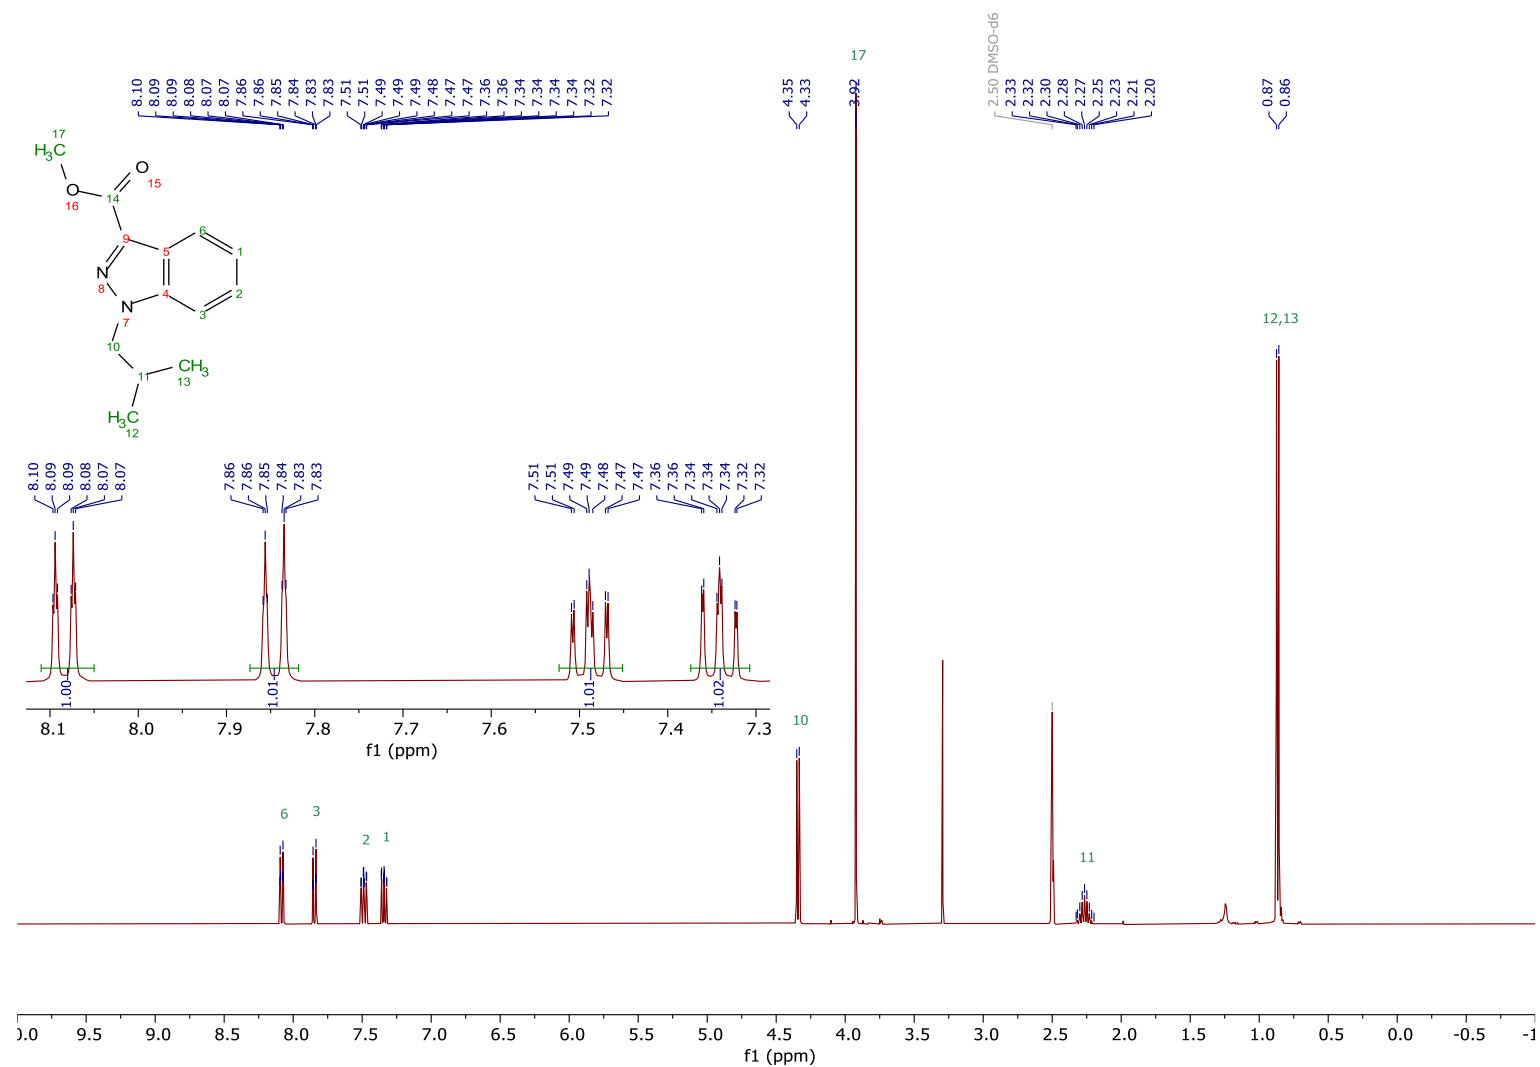

**$^{13}\text{C}$  NMR (101 MHz, DMSO- $d_6$ )**

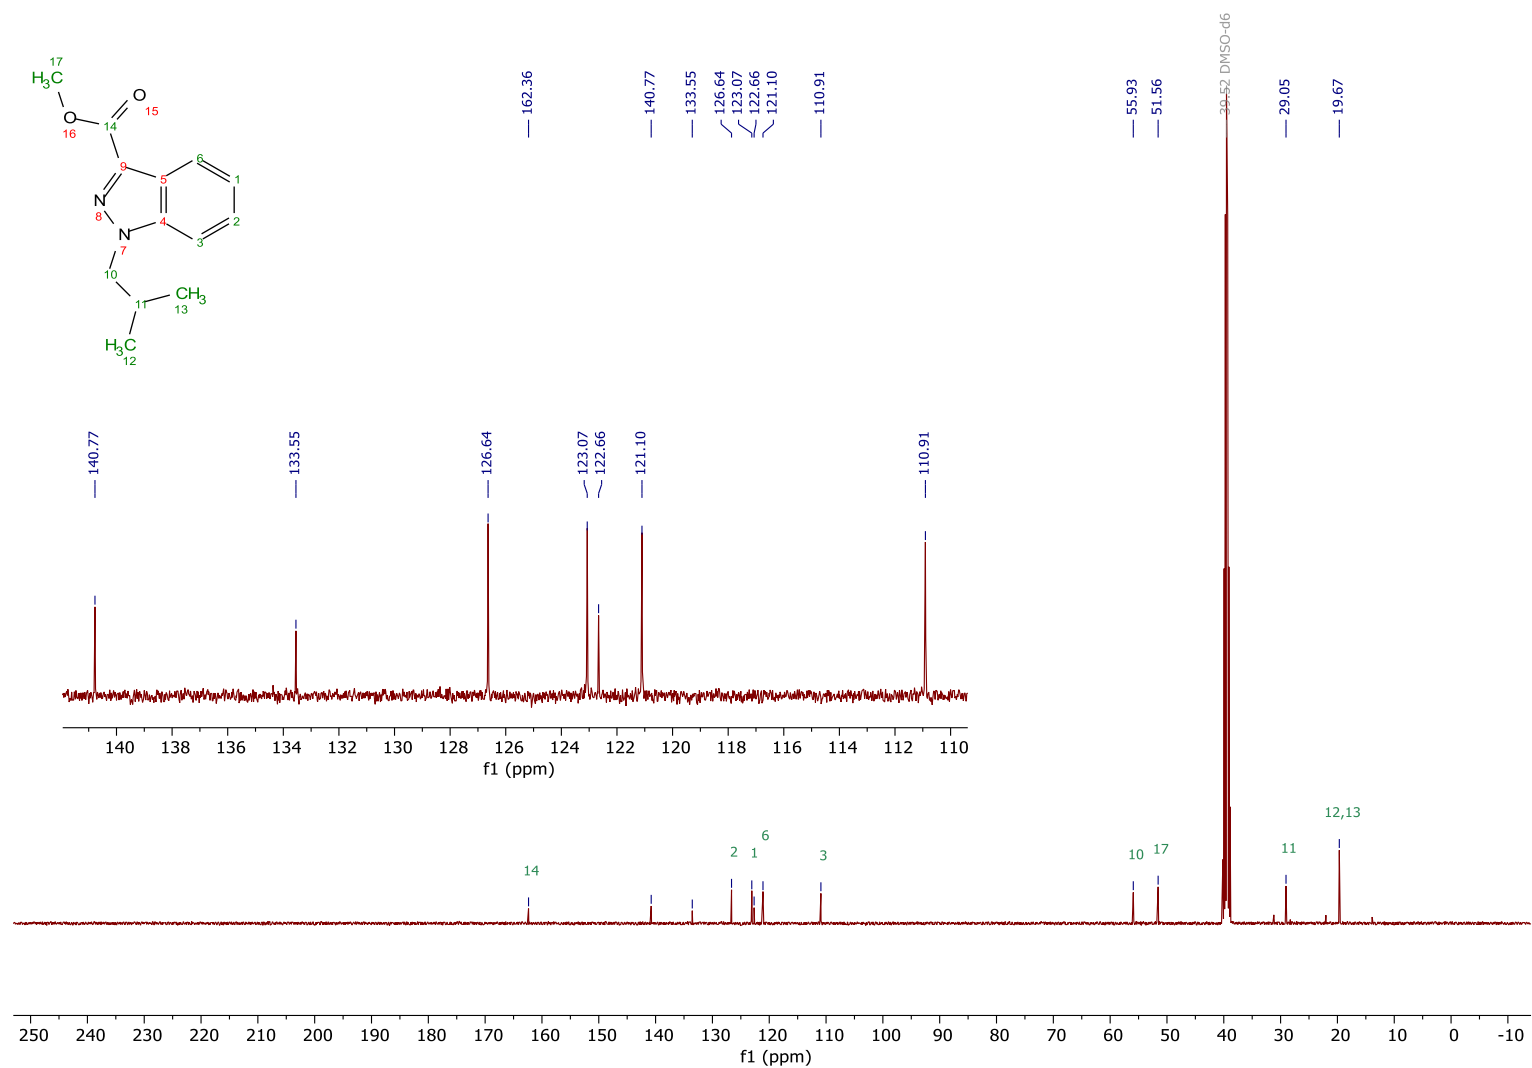

$^1\text{H}$ - $^{13}\text{C}$  HSQC (DMSO- $d_6$ )

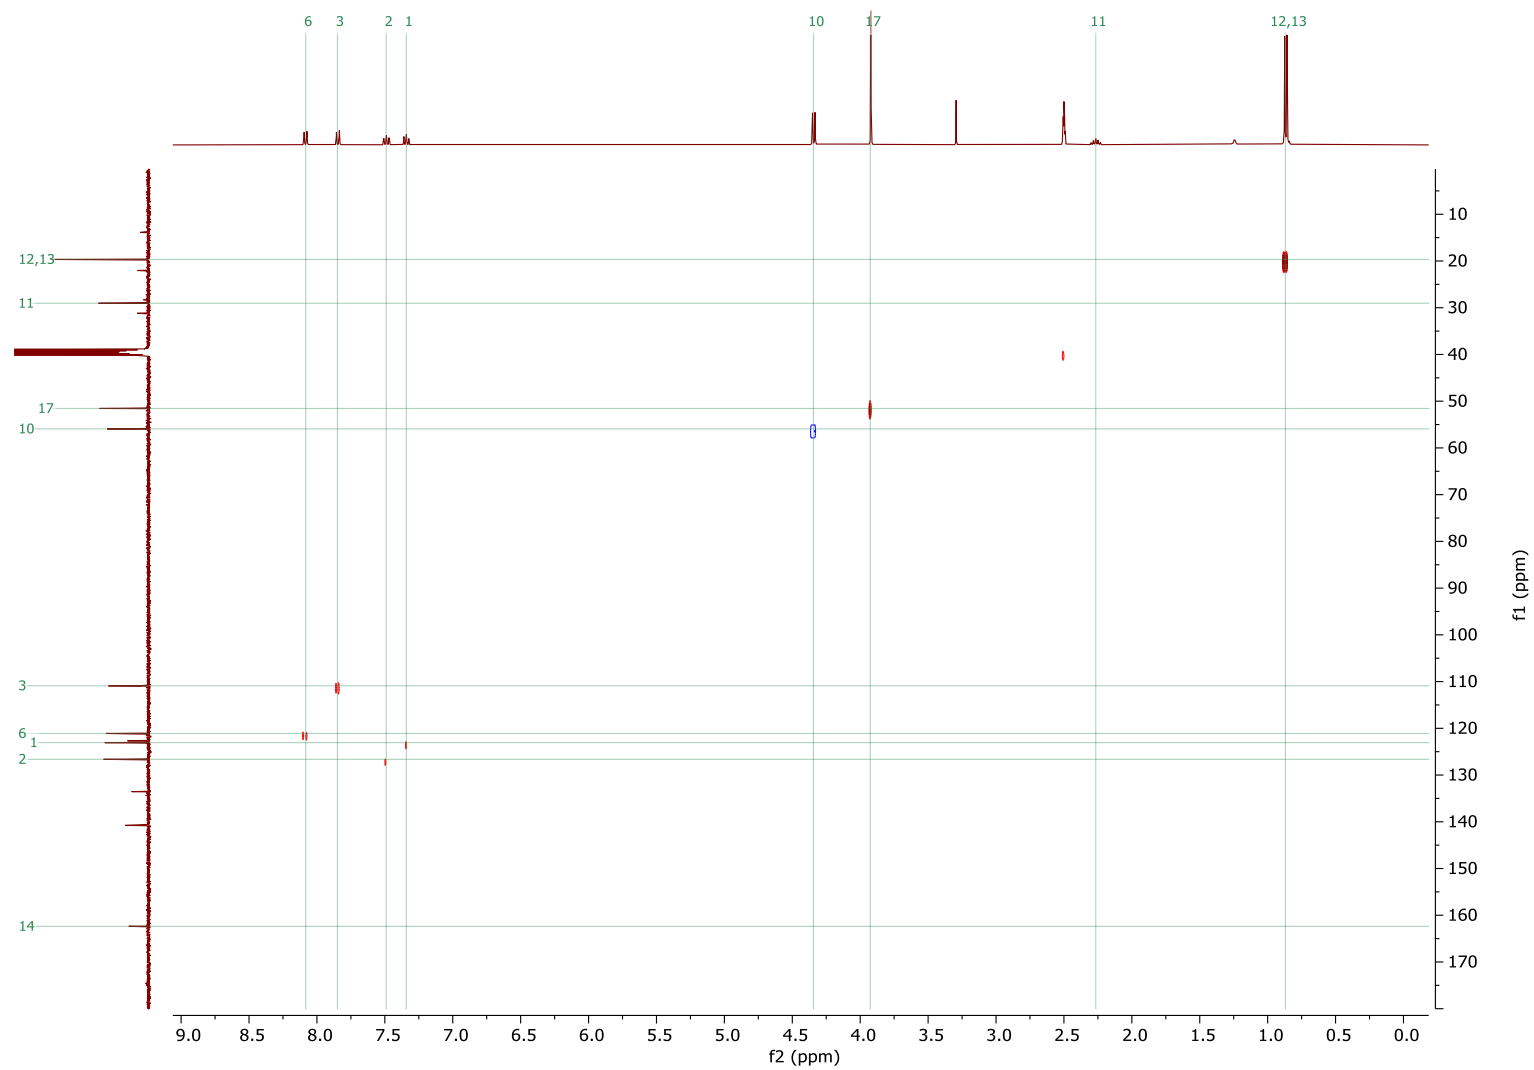

$^1\text{H}$ - $^{13}\text{C}$  HMBC (DMSO- $d_6$ )

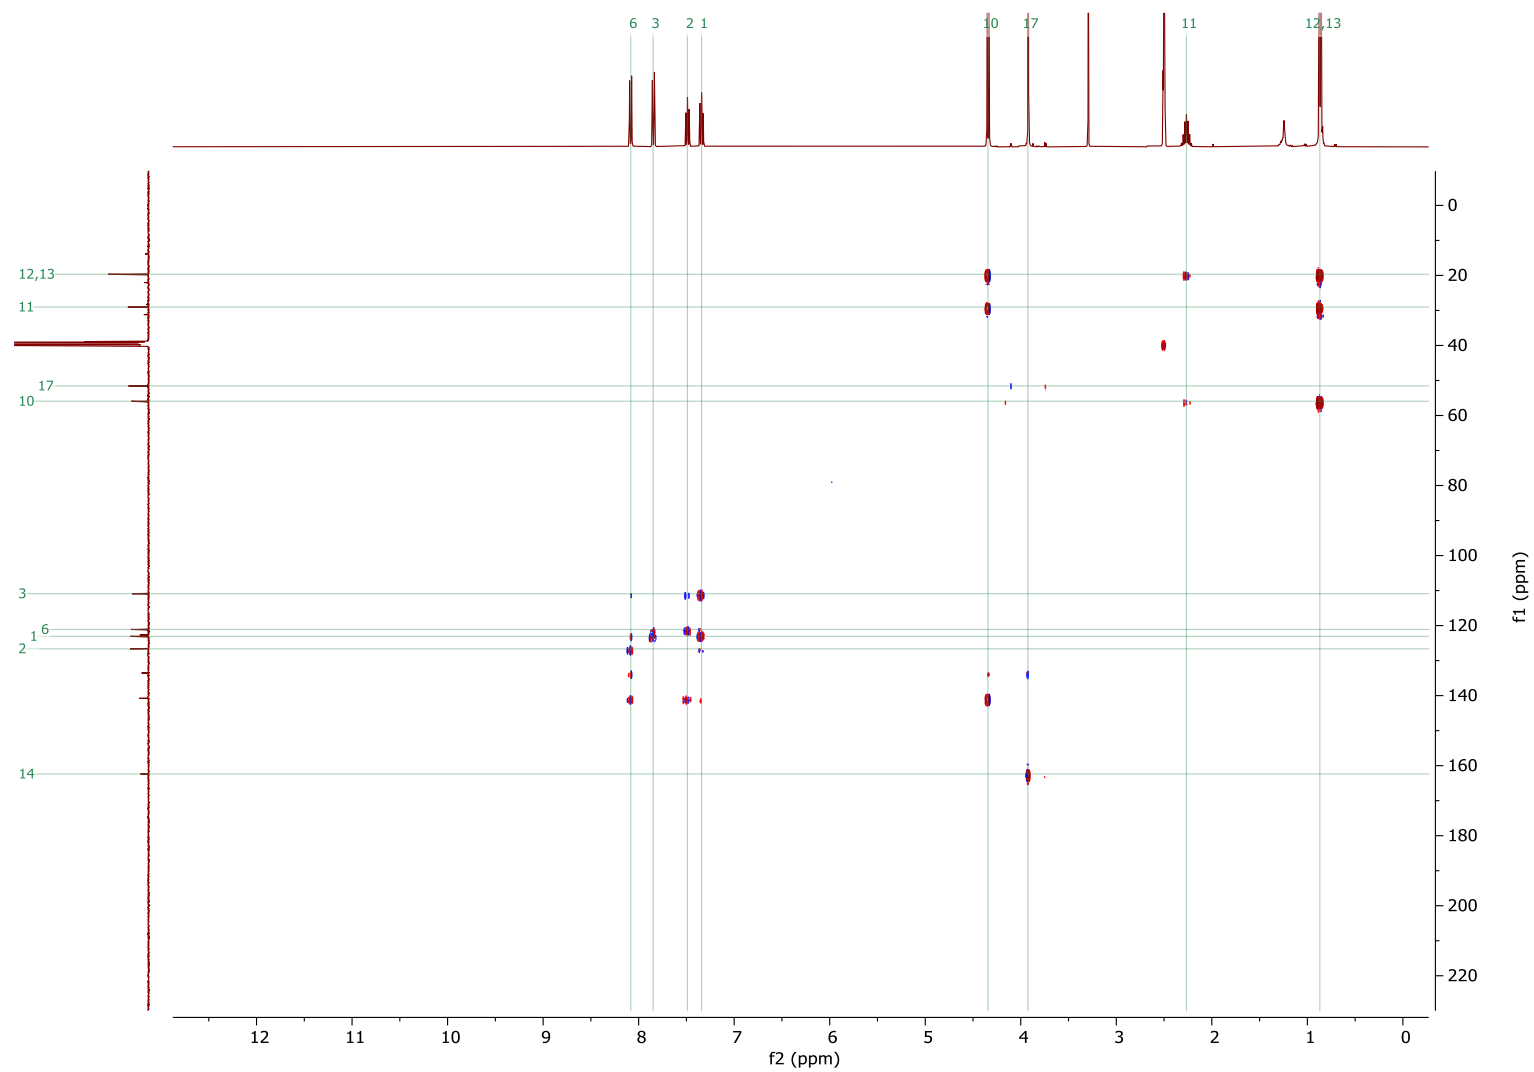

$^1\text{H}$ - $^1\text{H}$  NOESY (400 MHz, DMSO- $d_6$ )

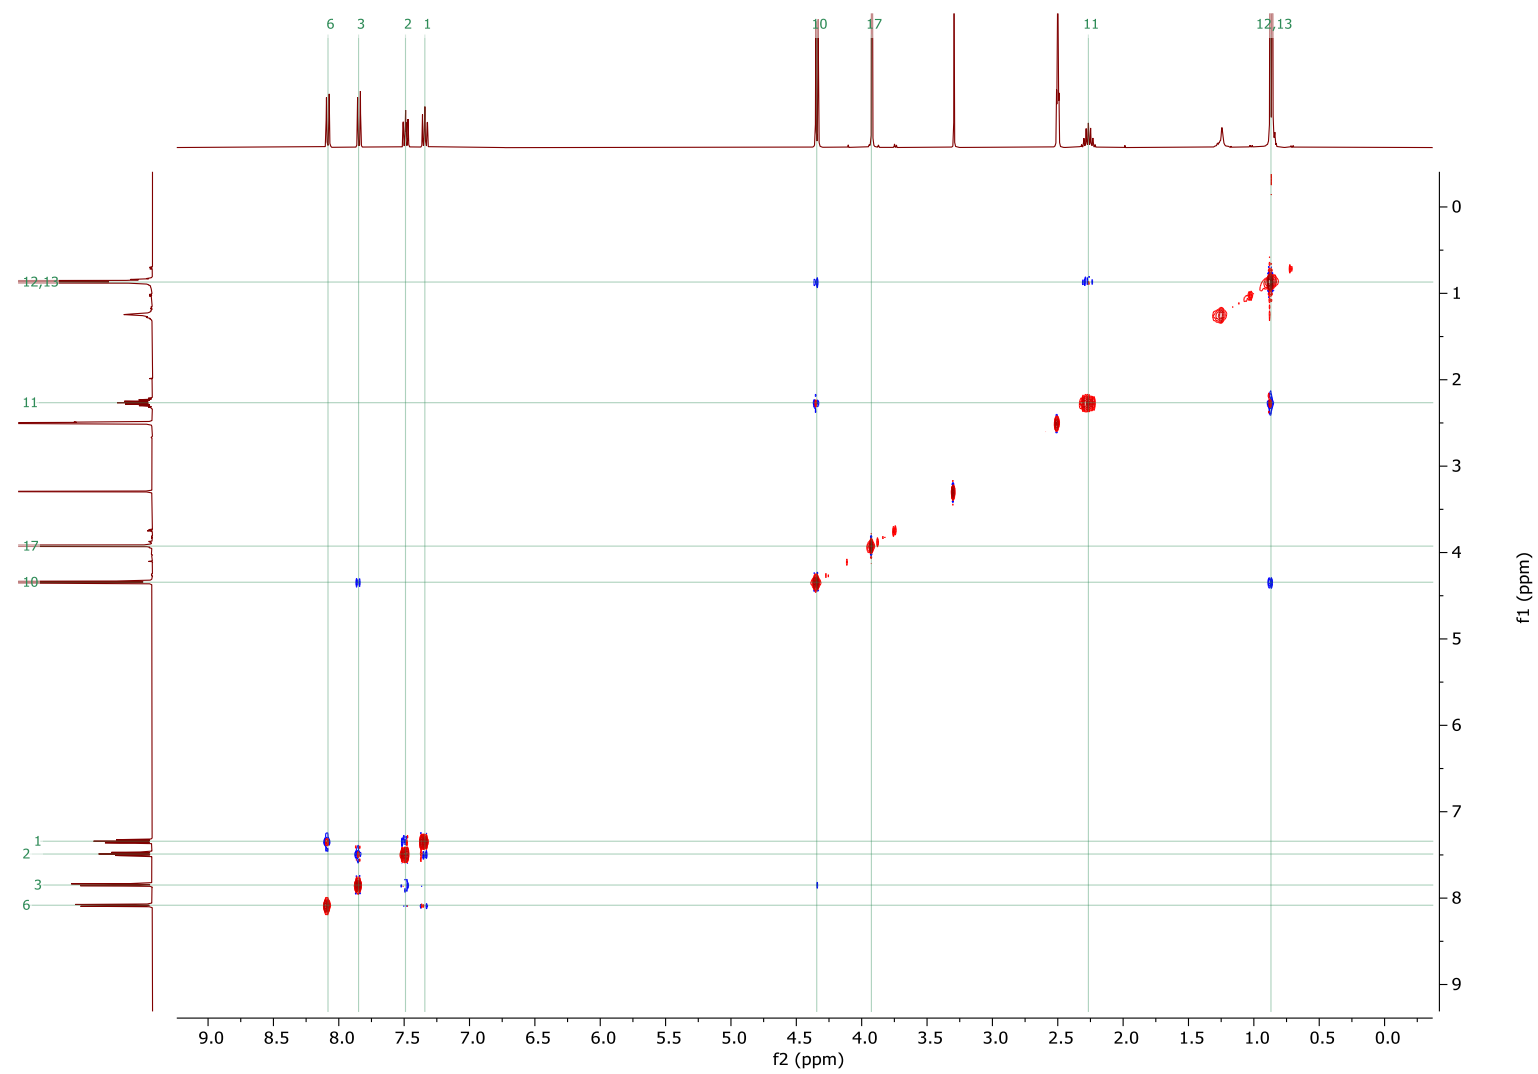

**Methyl 1-isobutyl-1*H*-indazole-4-carboxylate (2d)**

**<sup>1</sup>H NMR (400 MHz, DMSO-*d*<sub>6</sub>)**

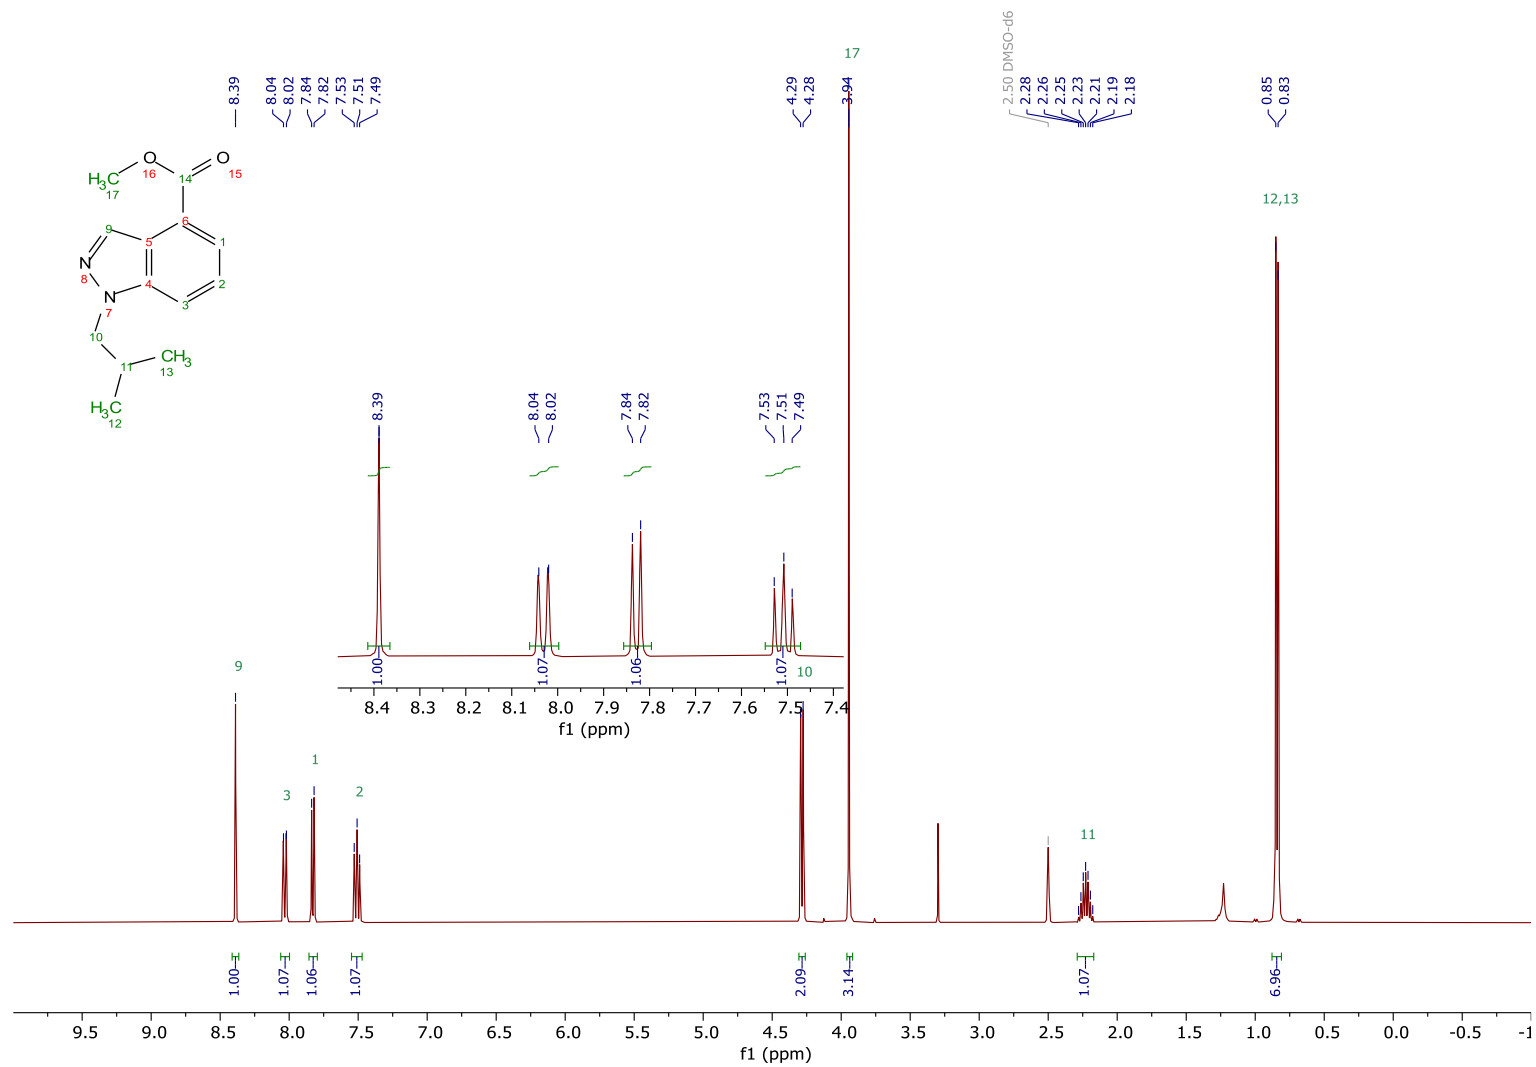

**$^{13}\text{C}$  NMR (101 MHz, DMSO- $d_6$ )**

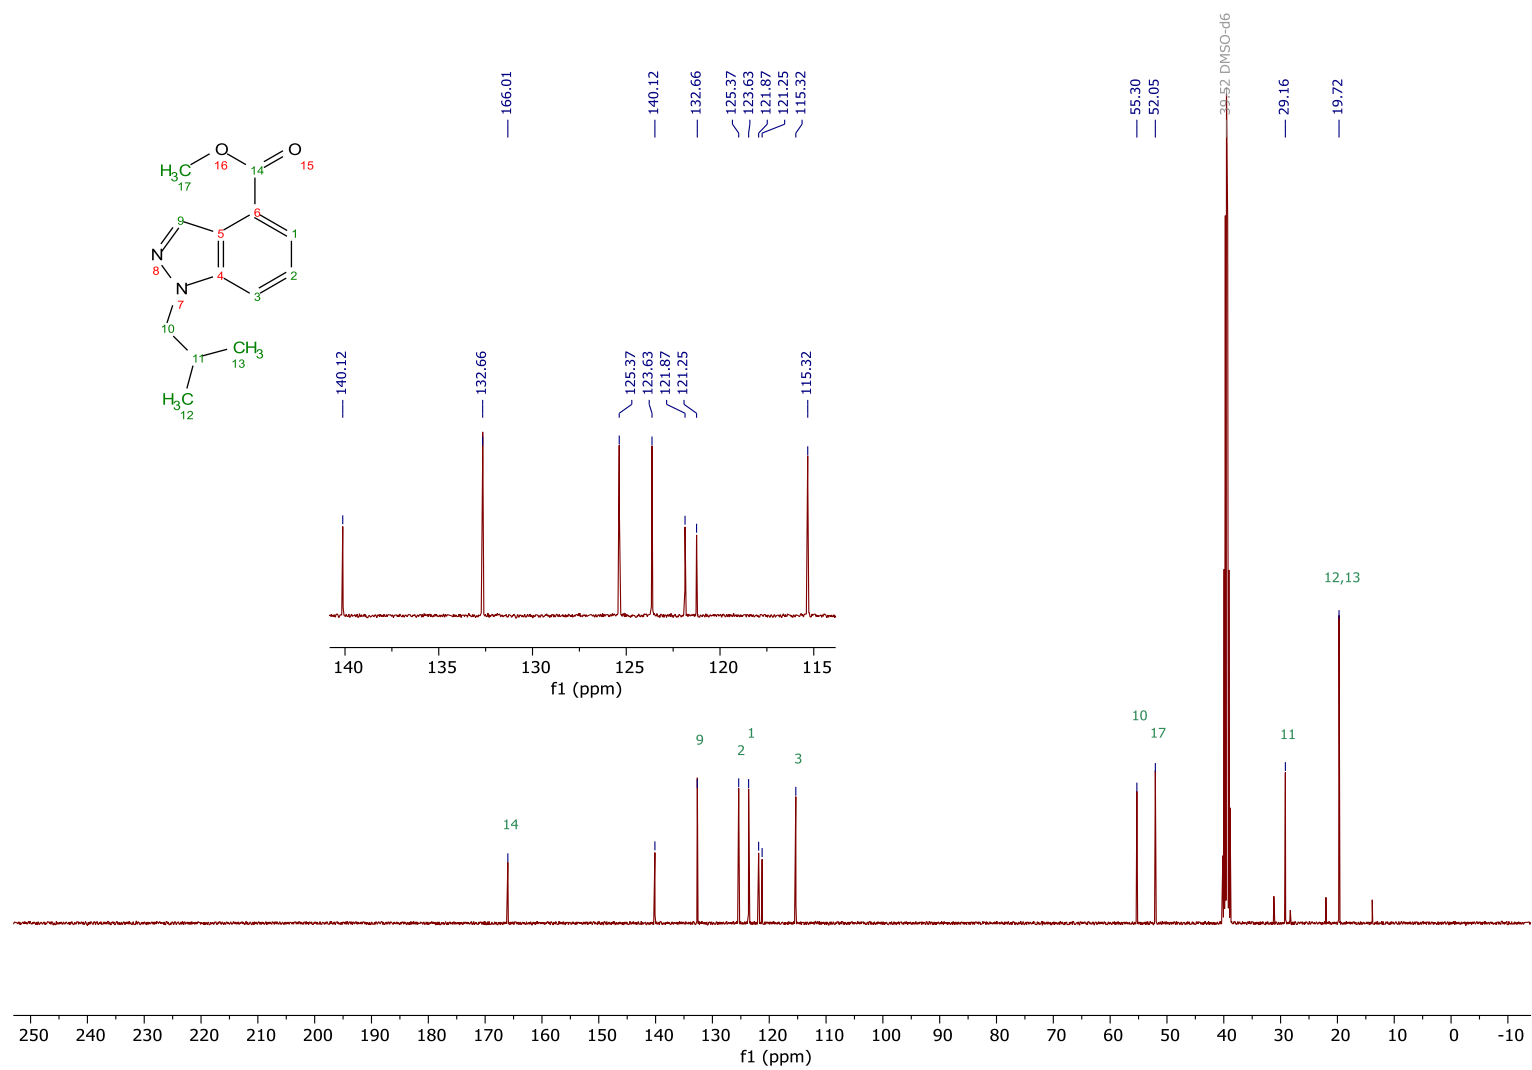

$^1\text{H}$ - $^{13}\text{C}$  HSQC (DMSO- $d_6$ )

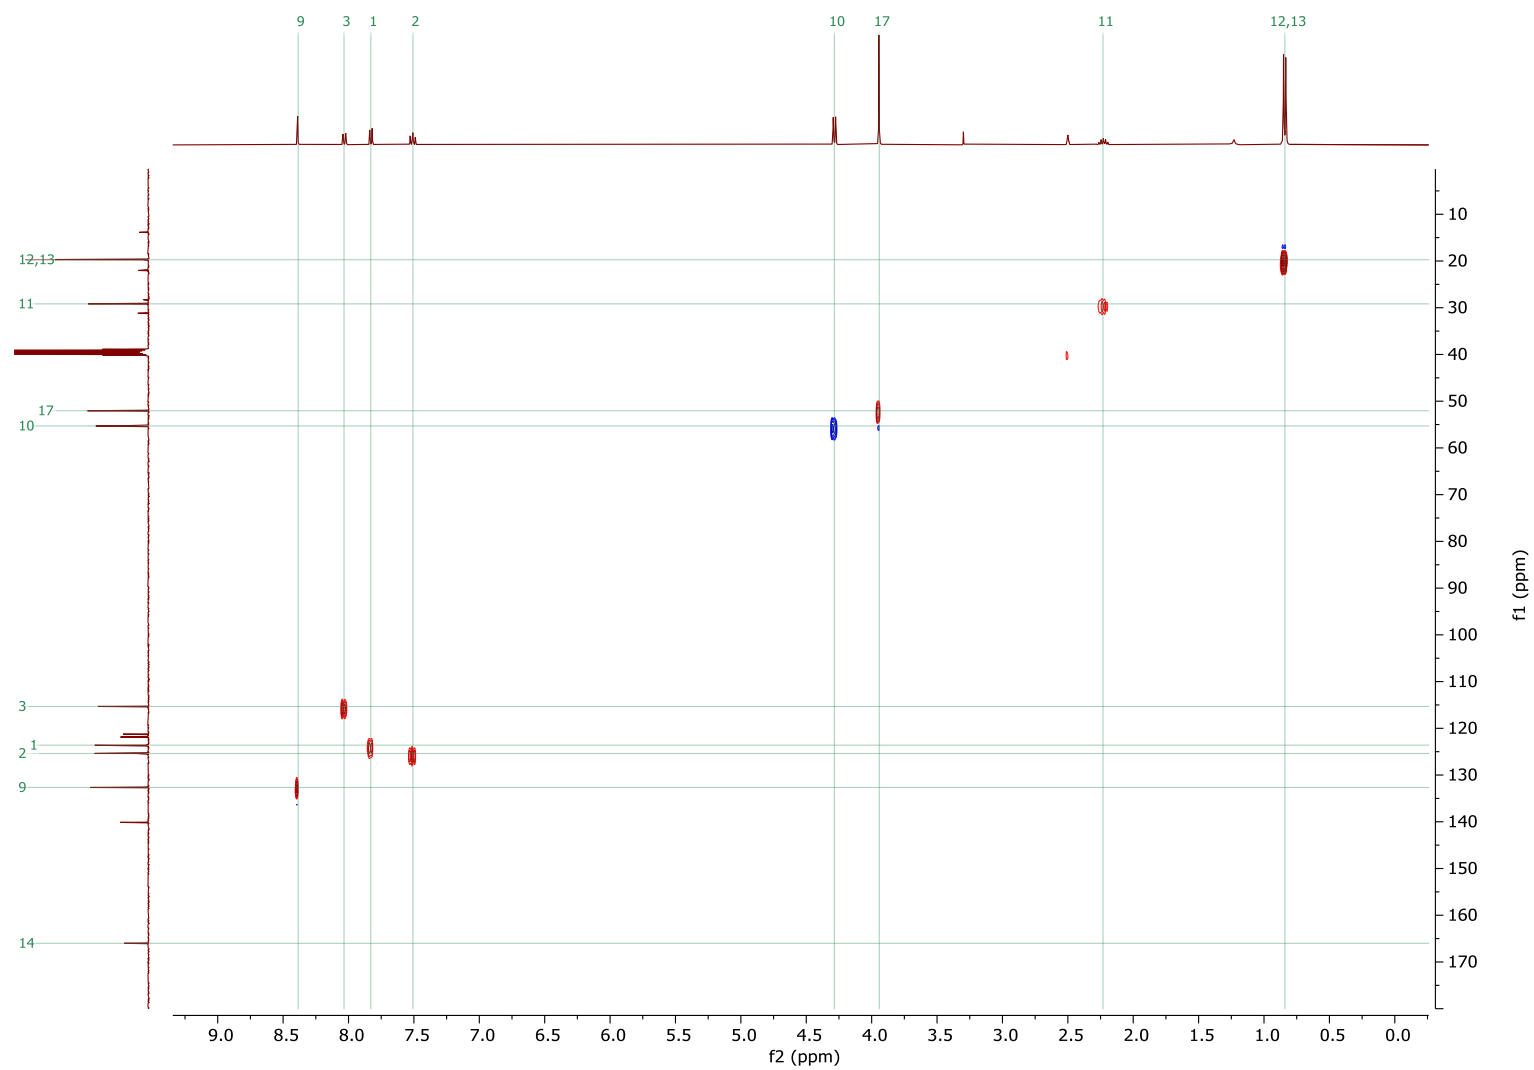

$^1\text{H}$ - $^{13}\text{C}$  HMBC (DMSO- $d_6$ )

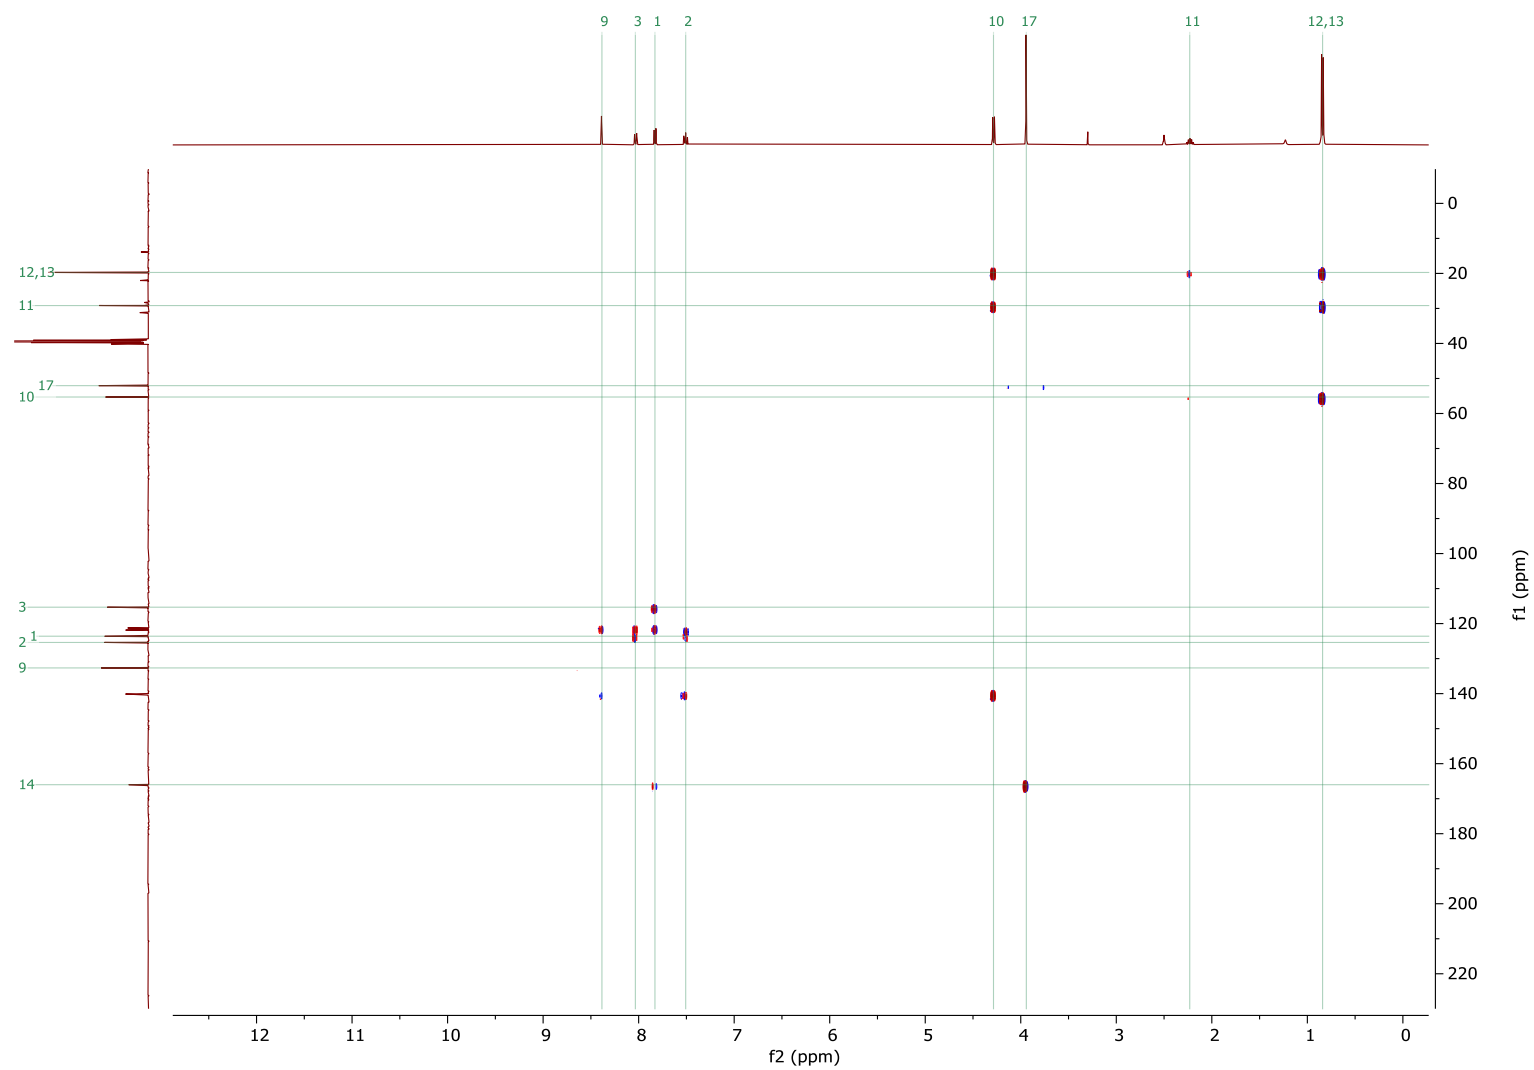

$^1\text{H}$ - $^1\text{H}$  NOESY (400 MHz, DMSO- $d_6$ )

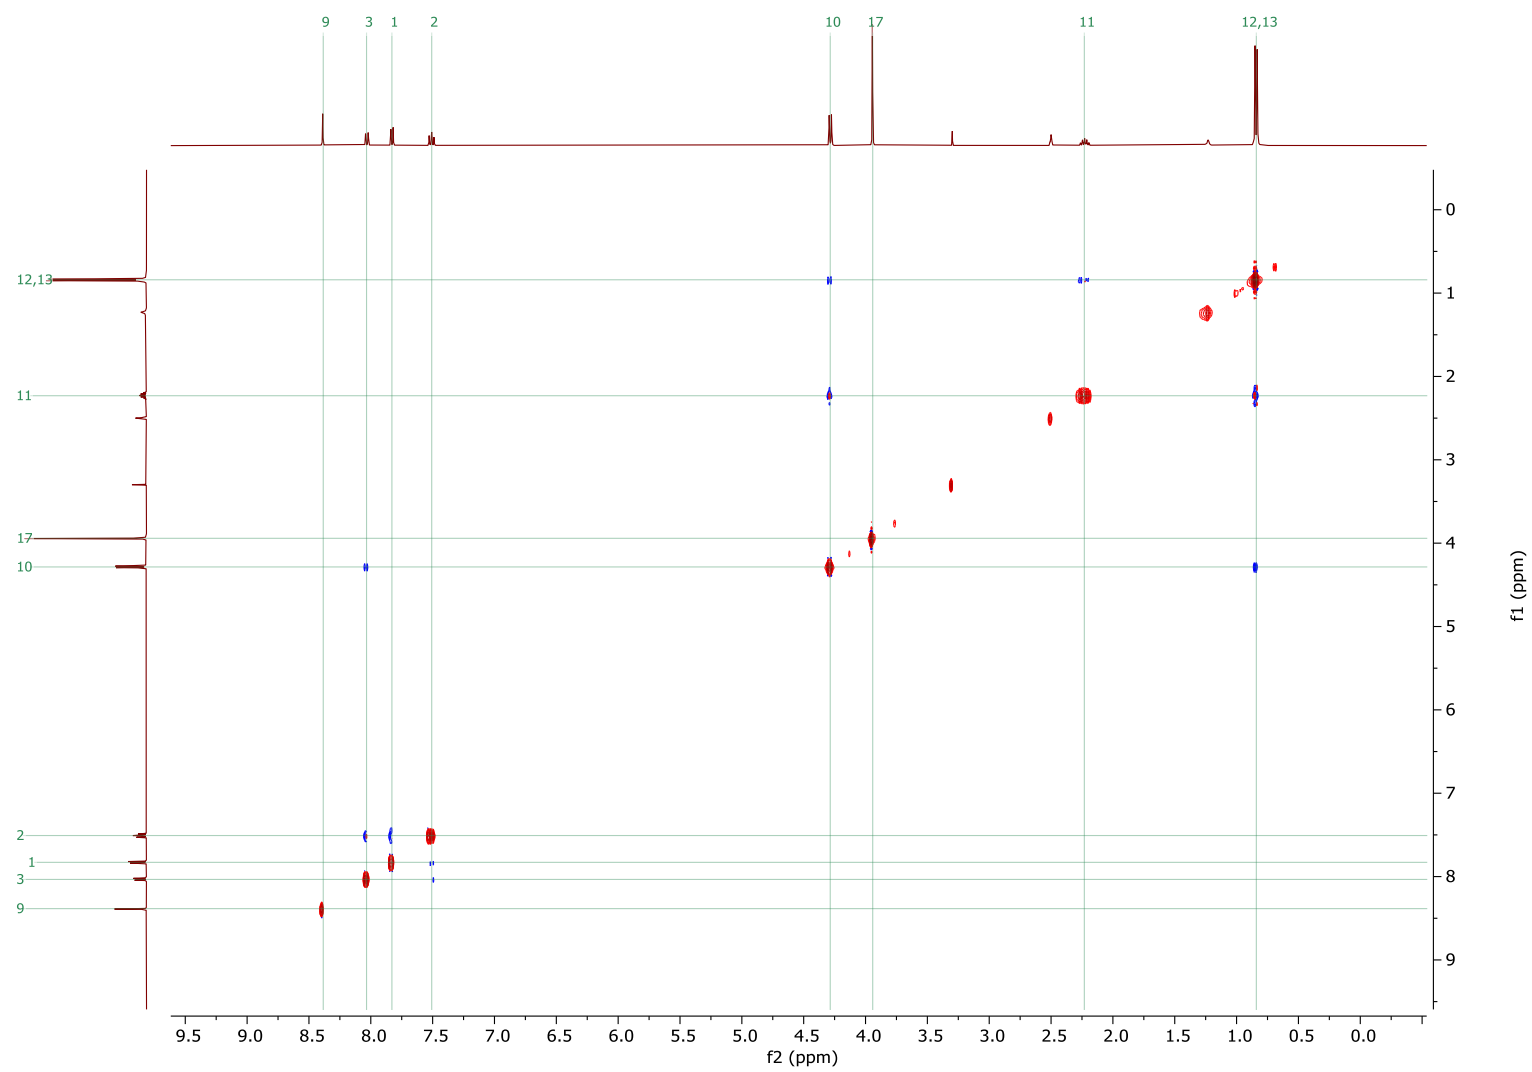

# Methyl 1-isobutyl-1*H*-indazole-5-carboxylate (2e)

<sup>1</sup>H NMR (400 MHz, DMSO-*d*<sub>6</sub>)

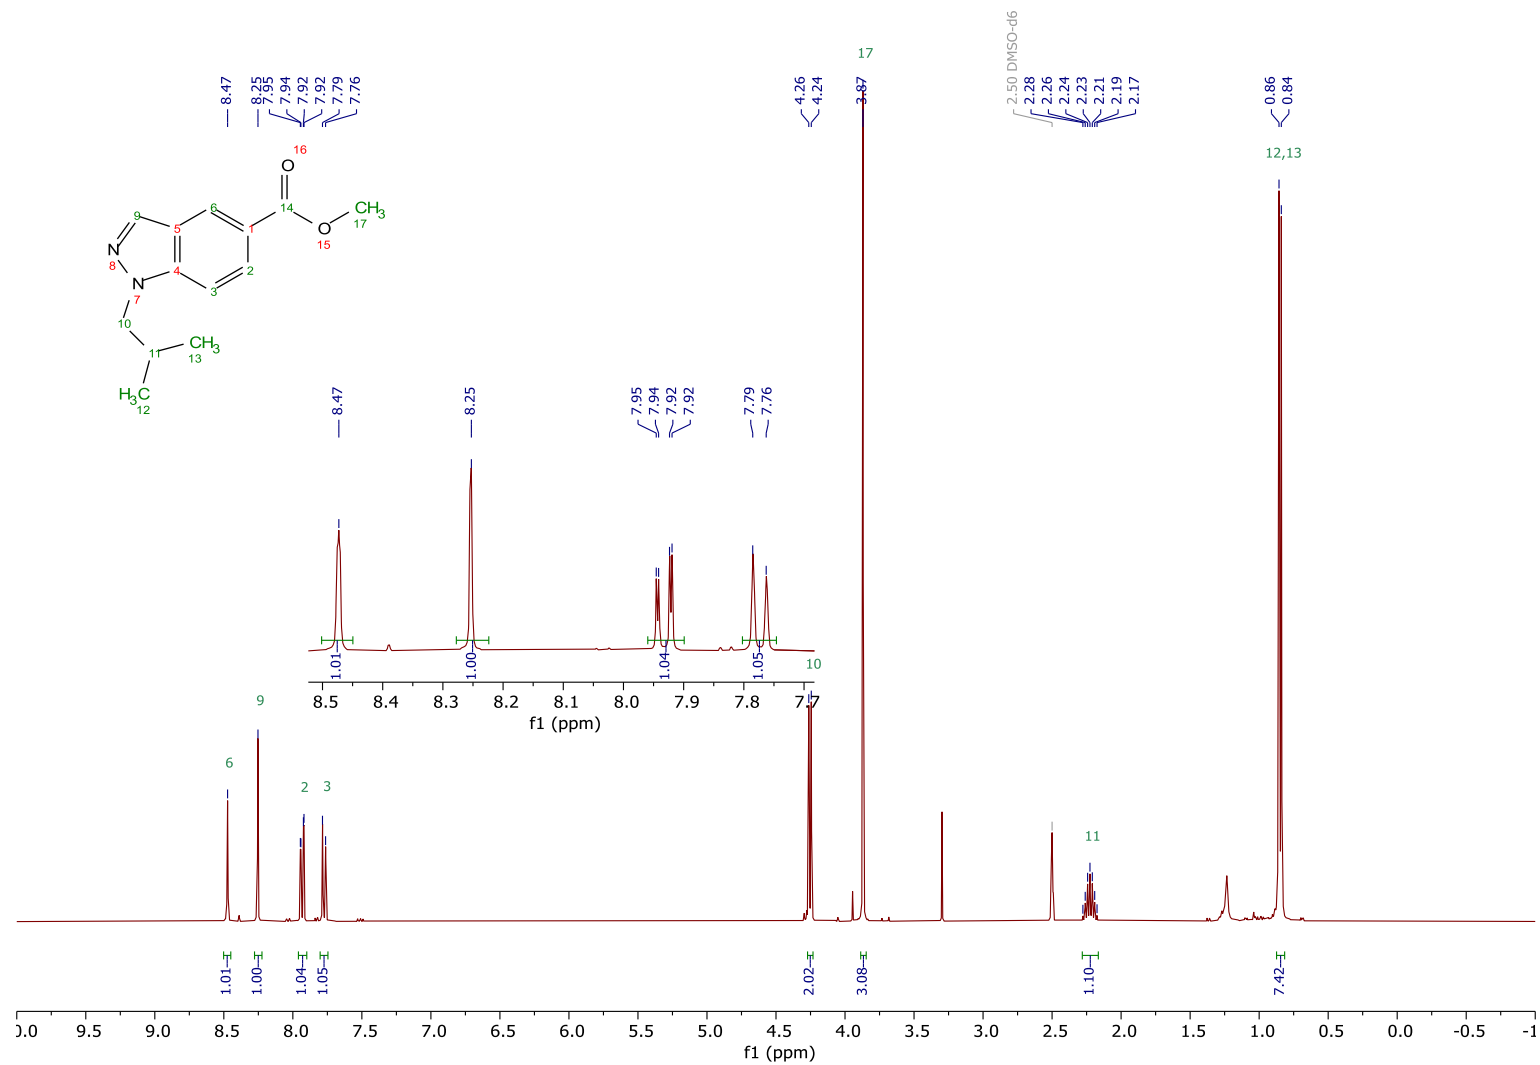

**<sup>13</sup>C NMR (101 MHz, DMSO-*d*<sub>6</sub>)**

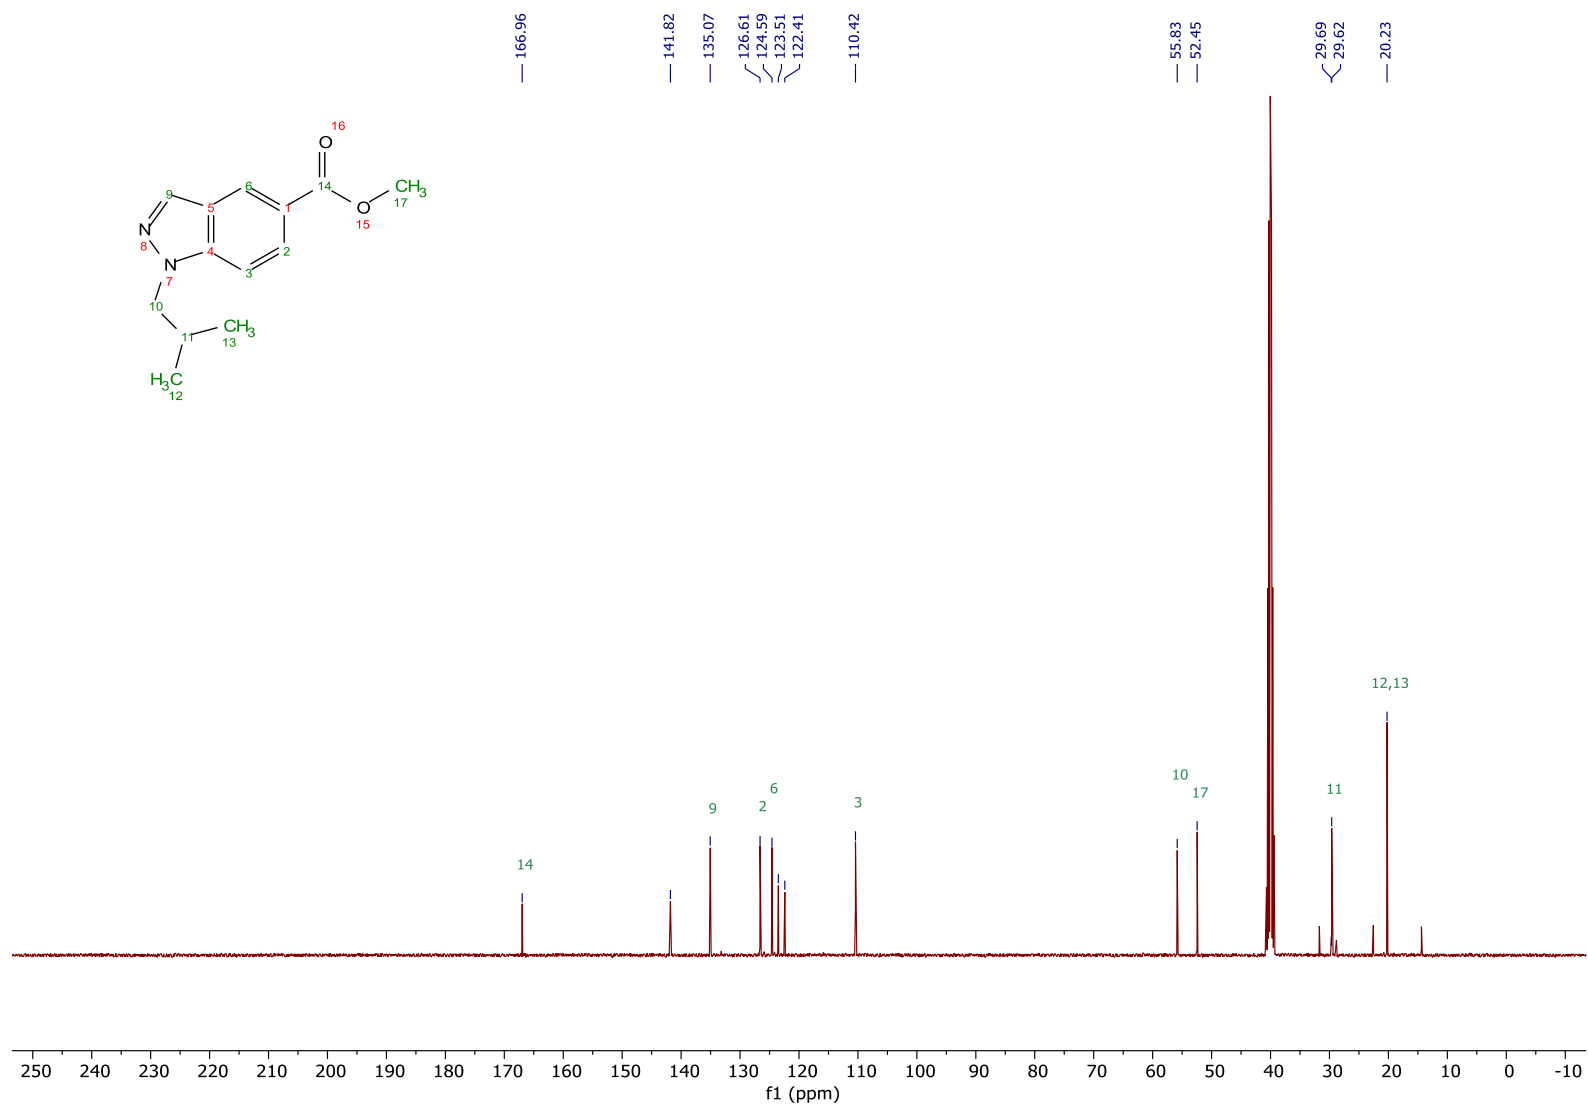

$^1\text{H}$ - $^{13}\text{C}$  HSQC (DMSO- $d_6$ )

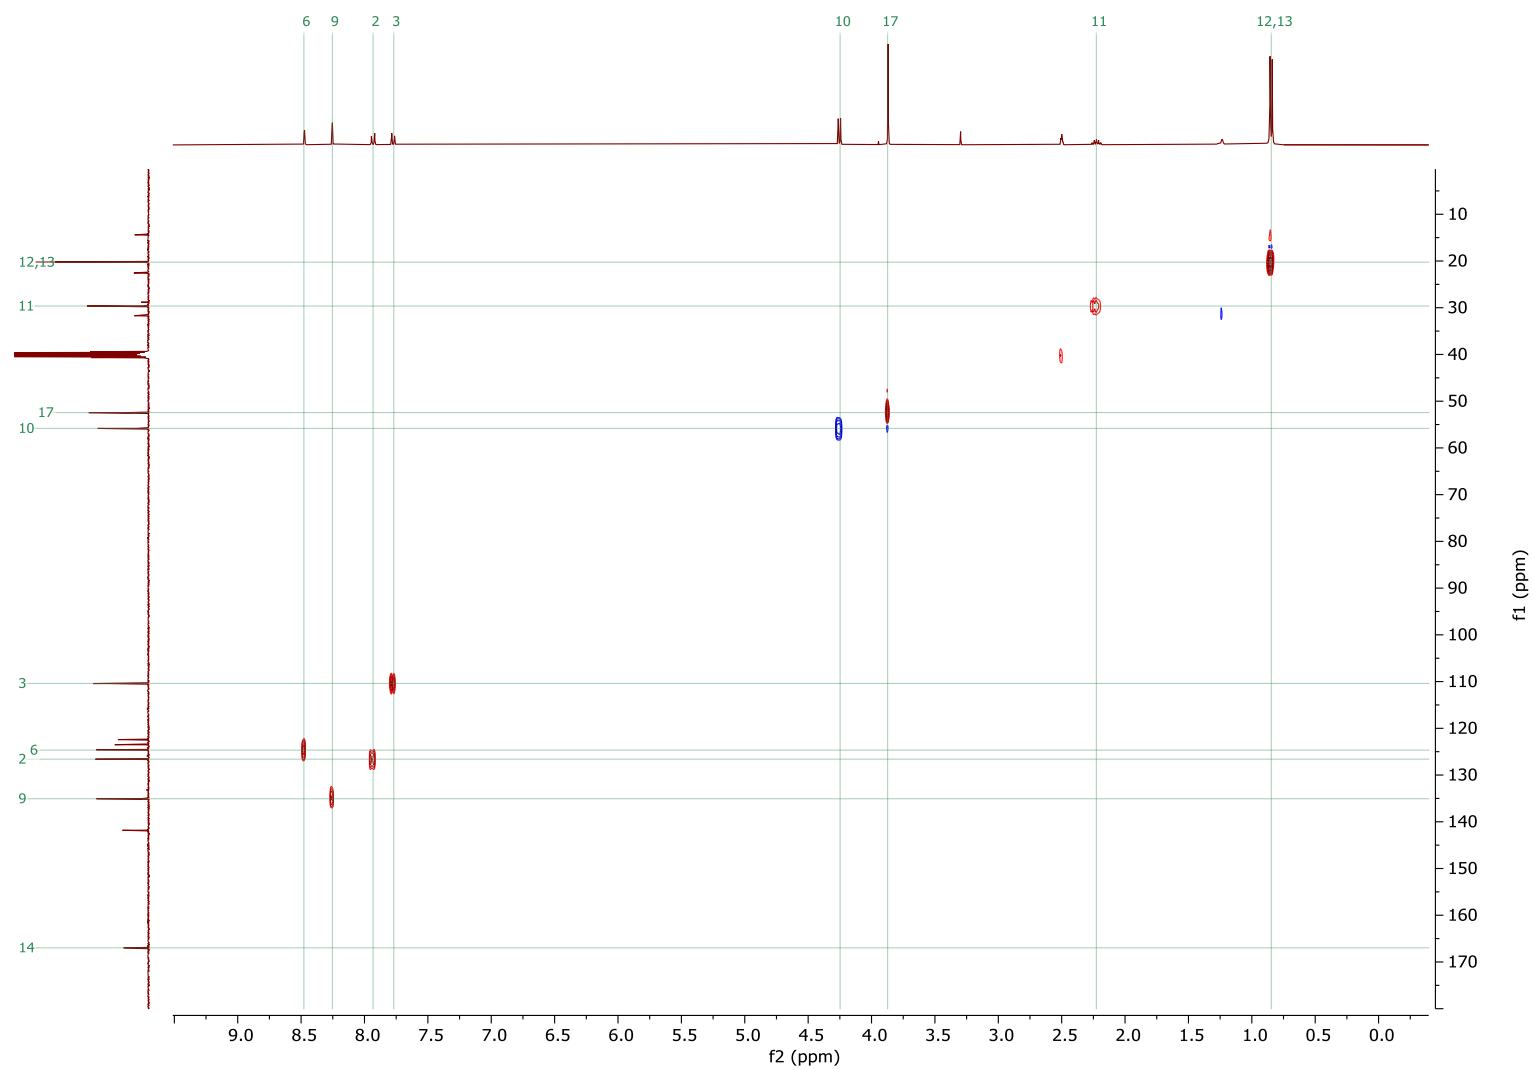

$^1\text{H}$ - $^{13}\text{C}$  HMBC (DMSO- $d_6$ )

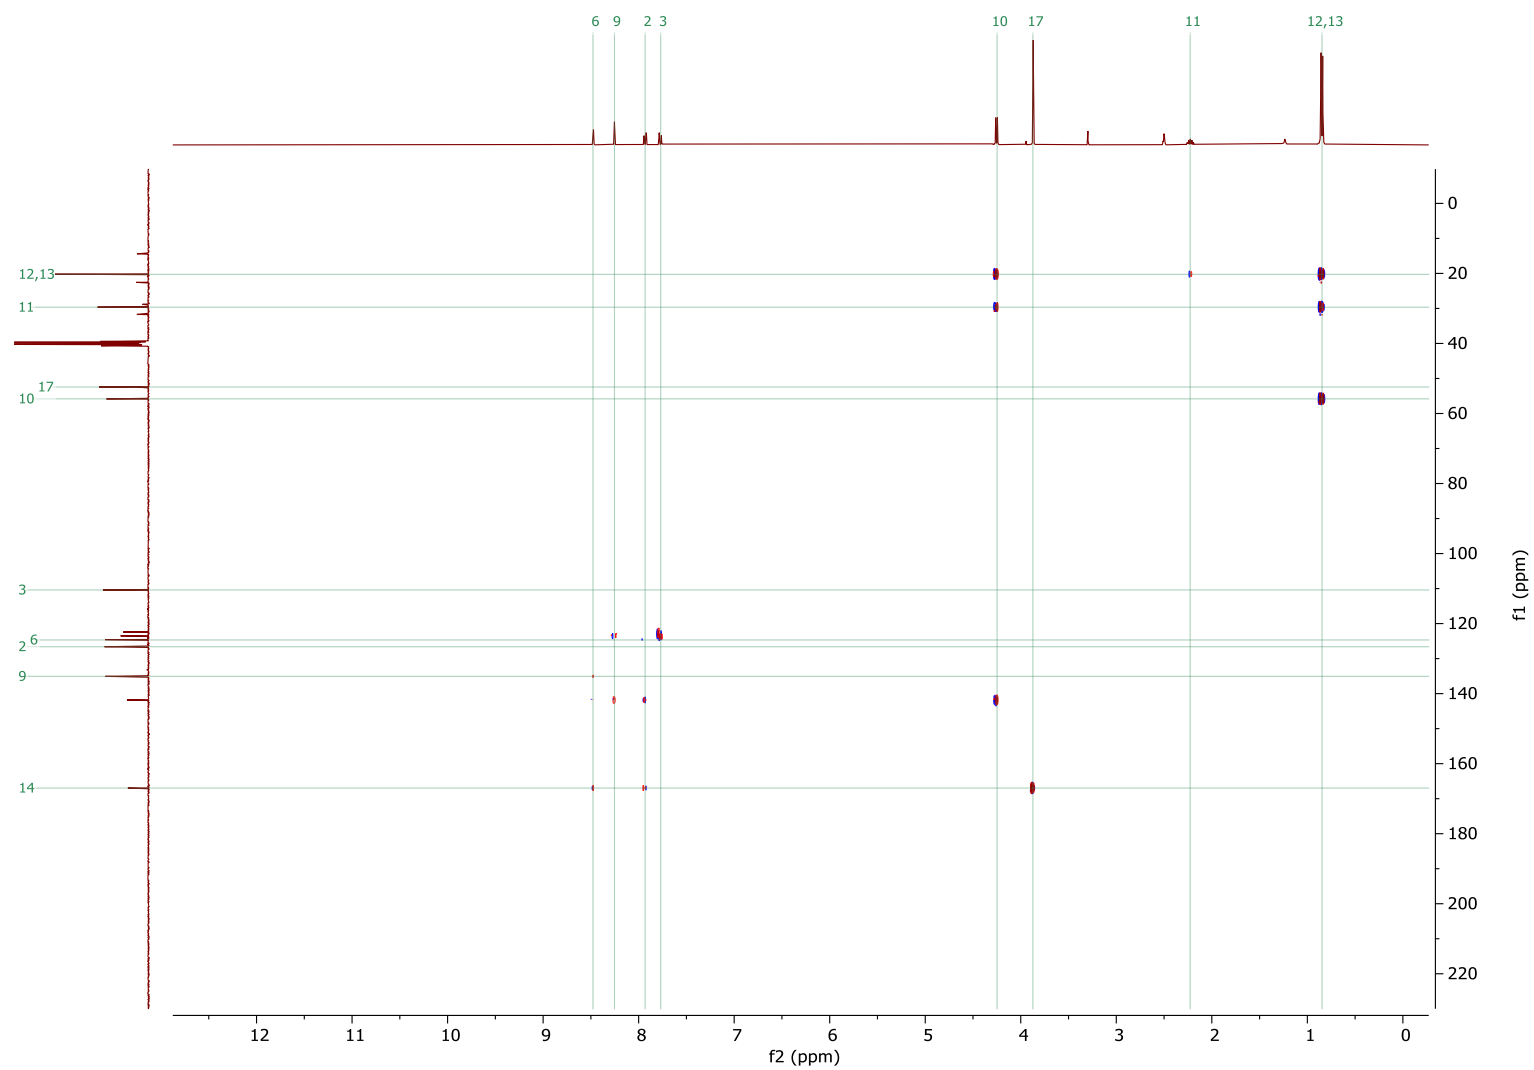

$^1\text{H}$ - $^1\text{H}$  NOESY (400 MHz, DMSO- $d_6$ )

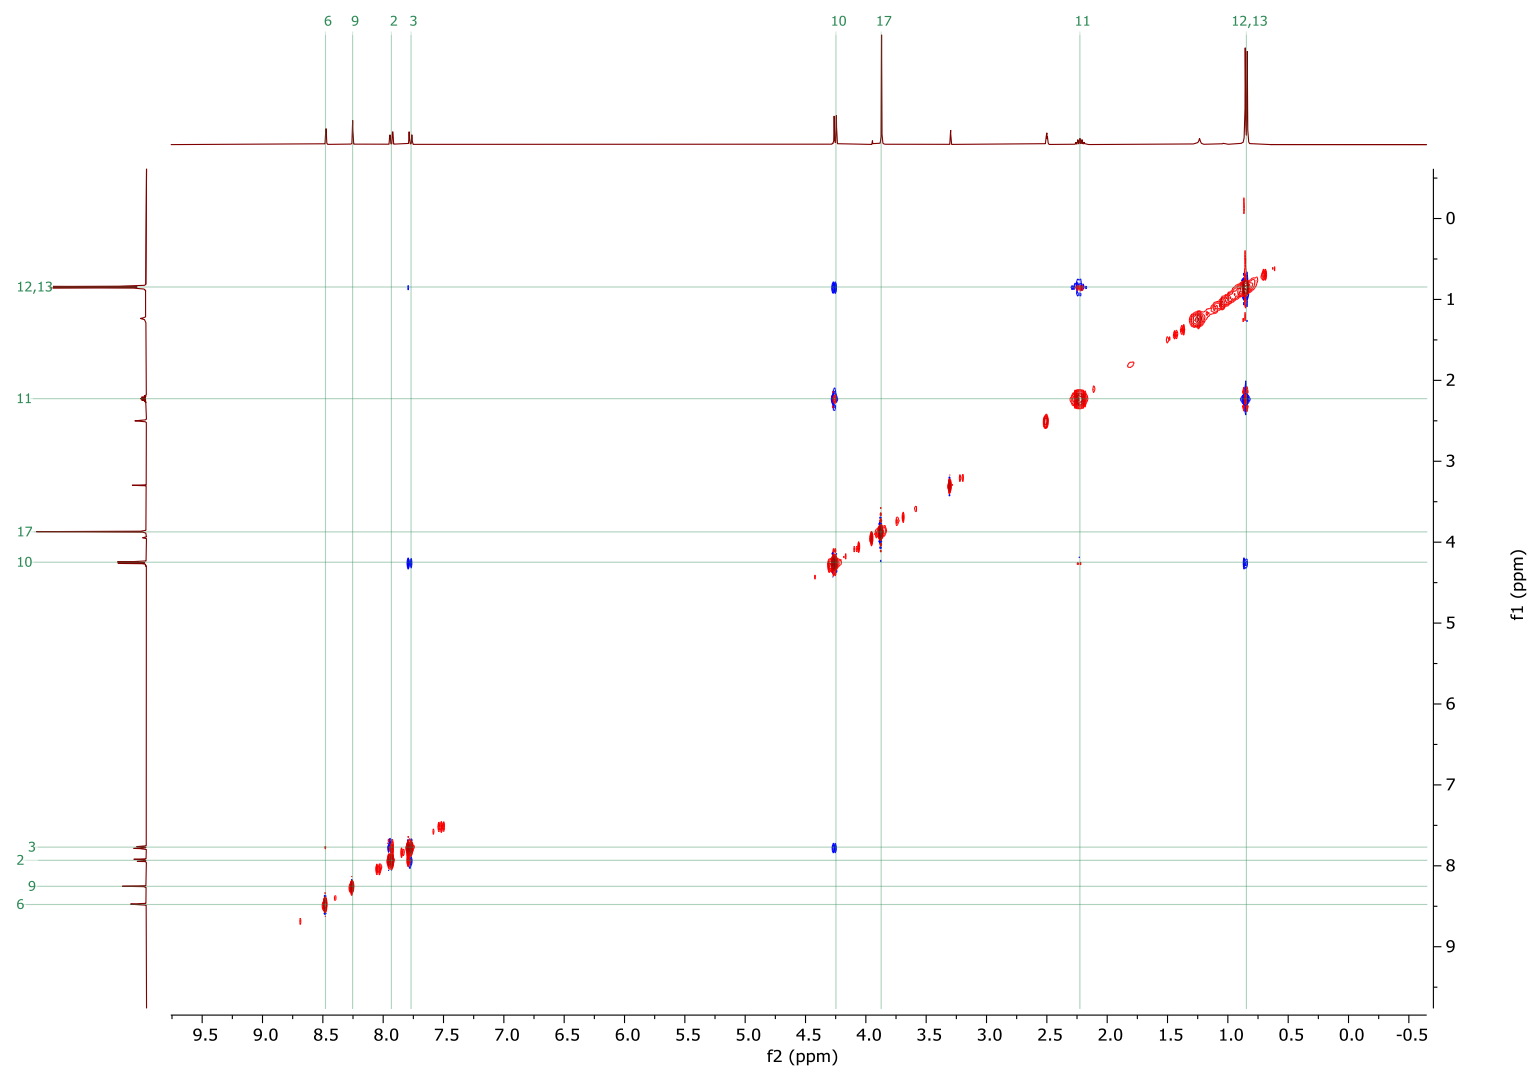

# Methyl 1-isobutyl-1*H*-indazole-6-carboxylate (2f)

<sup>1</sup>H NMR (400 MHz, DMSO-*d*<sub>6</sub>)

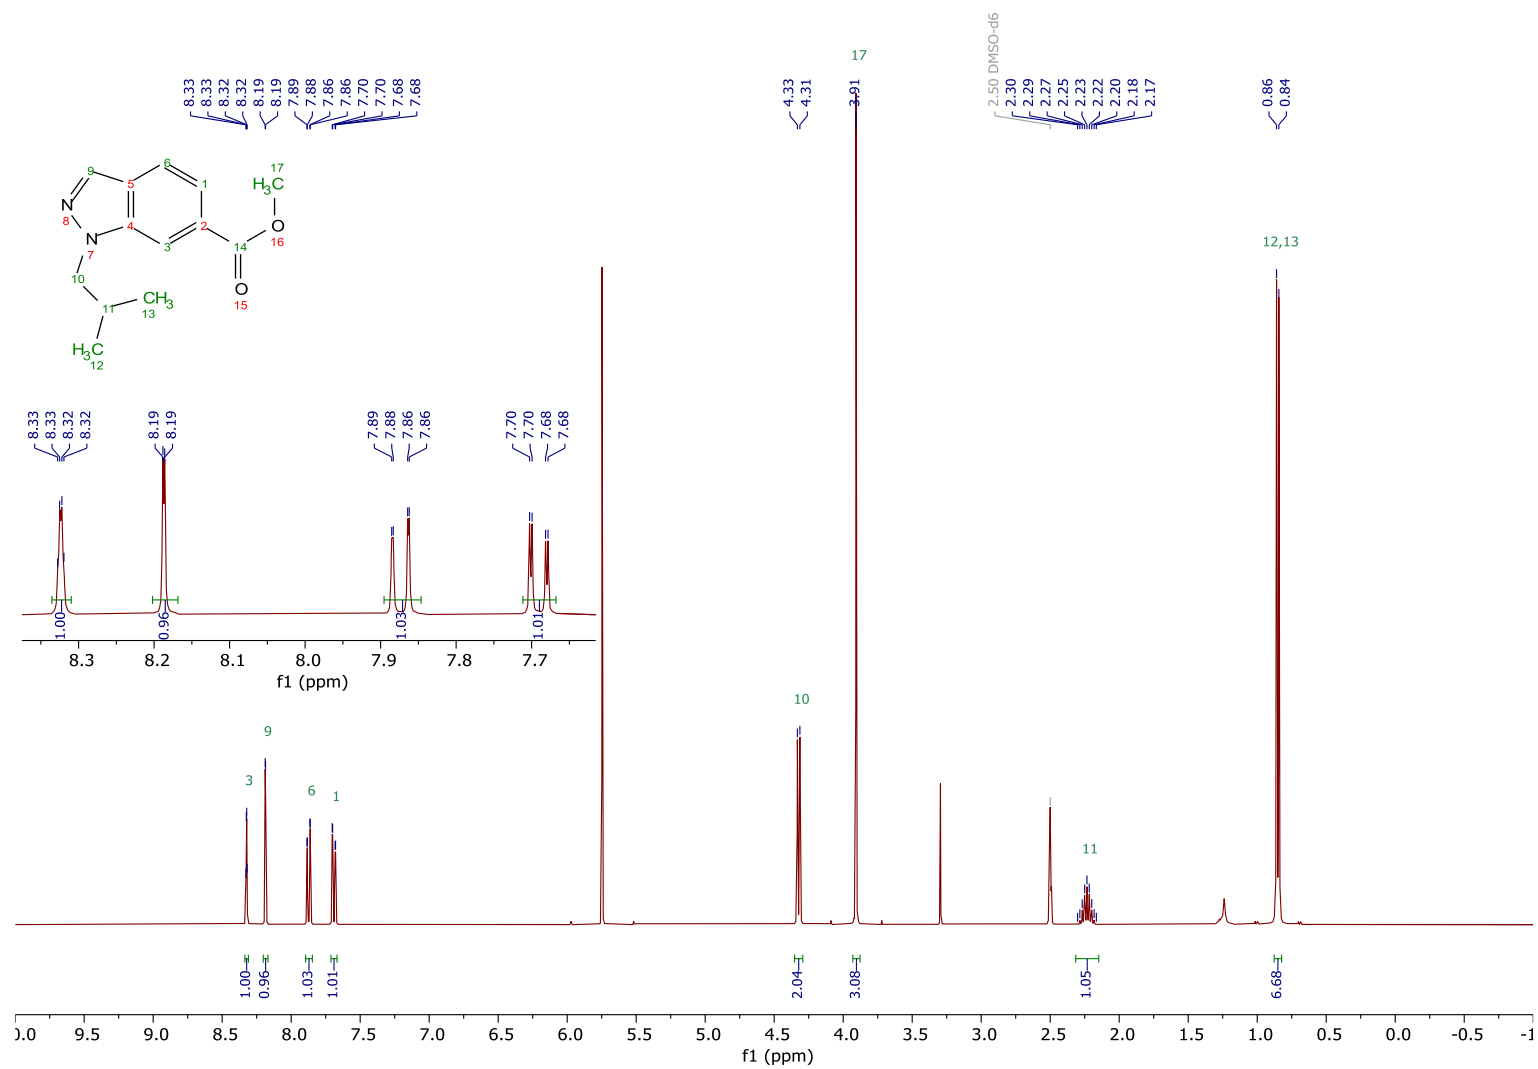

**$^{13}\text{C}$  NMR (101 MHz, DMSO- $d_6$ )**

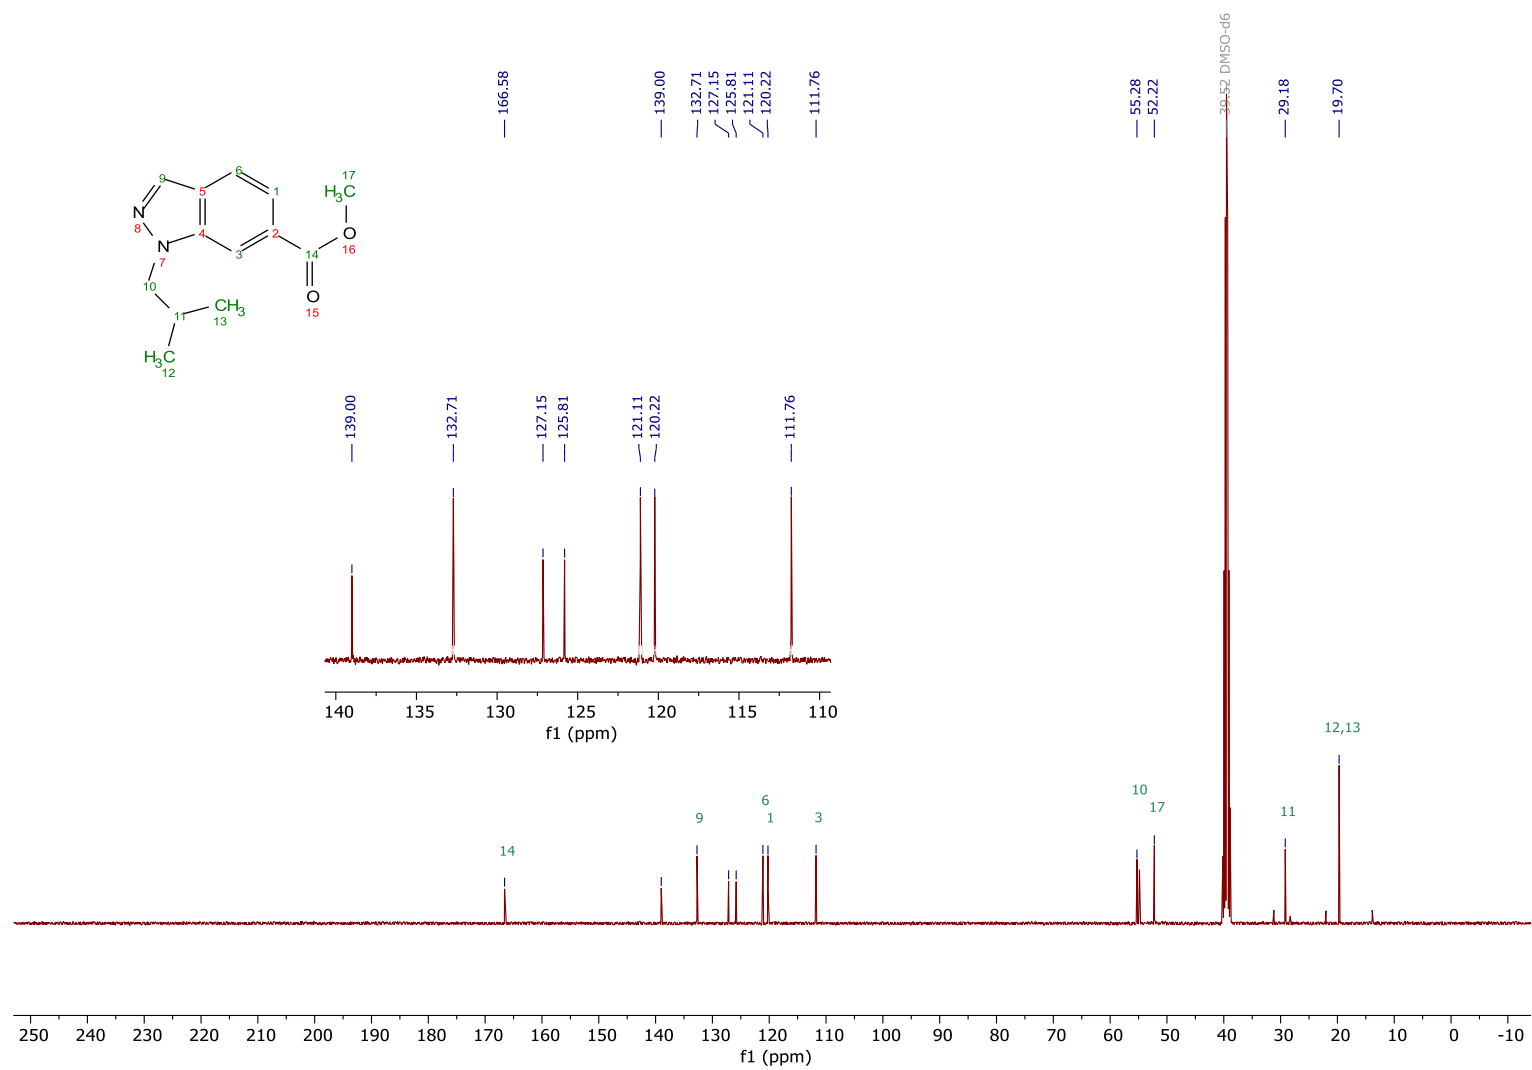

$^1\text{H}$ - $^{13}\text{C}$  HSQC (DMSO- $d_6$ )

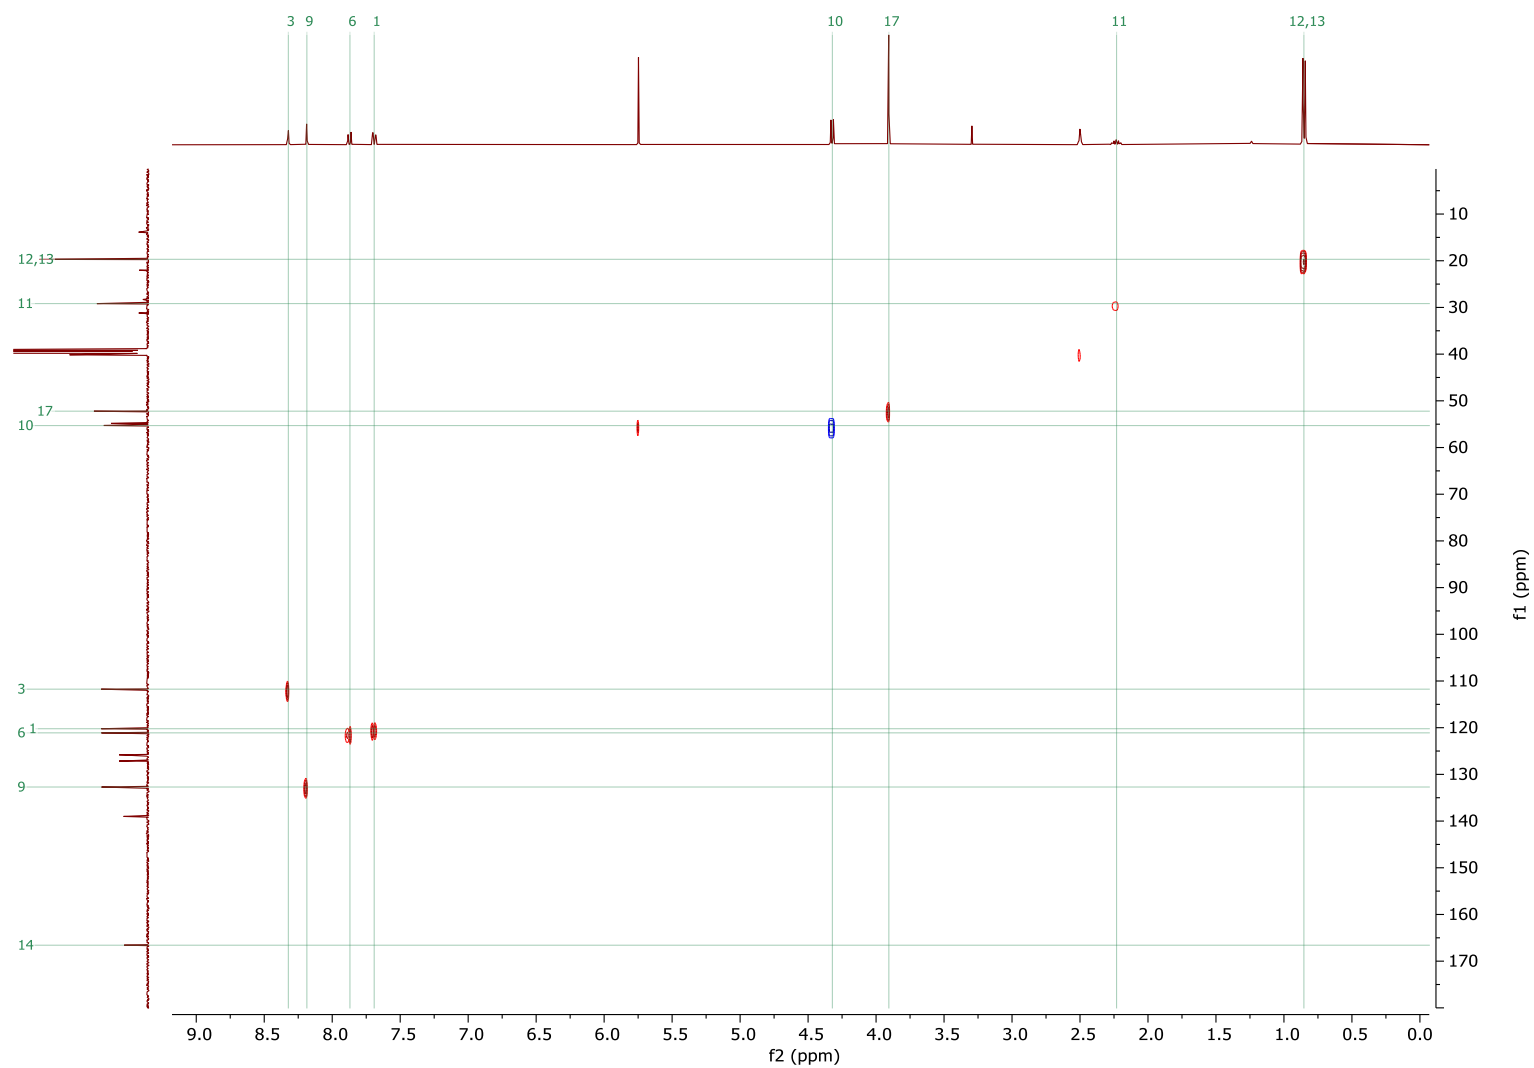

$^1\text{H}$ - $^{13}\text{C}$  HMBC (DMSO- $d_6$ )

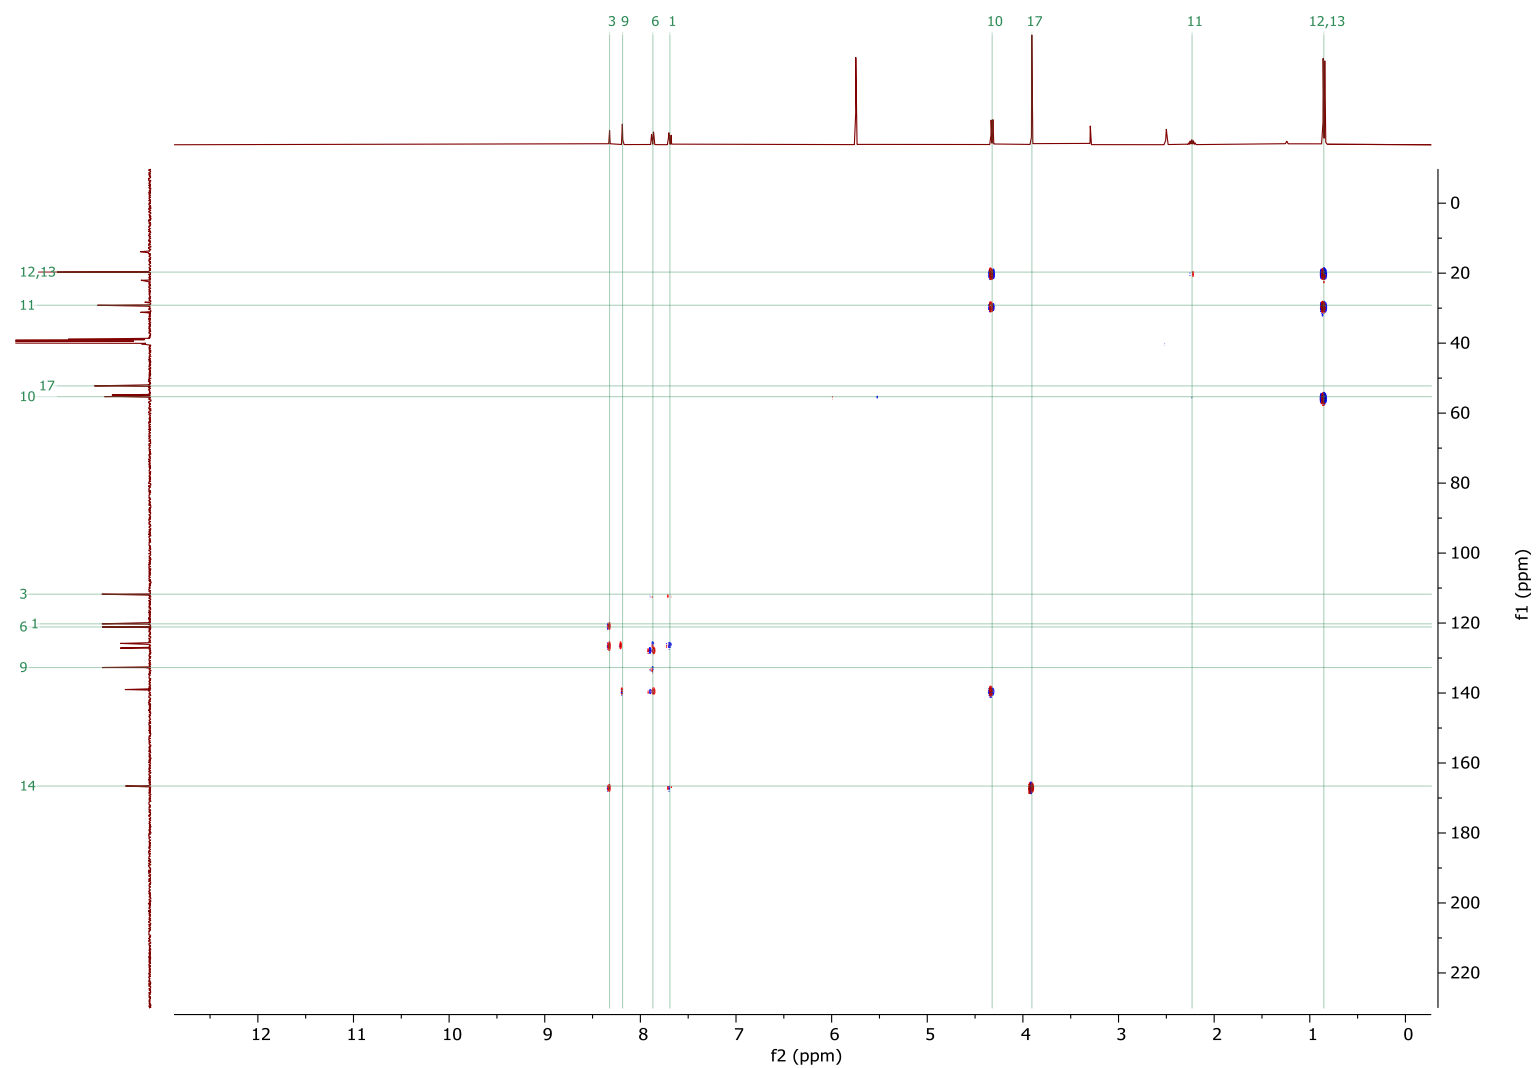

## S152

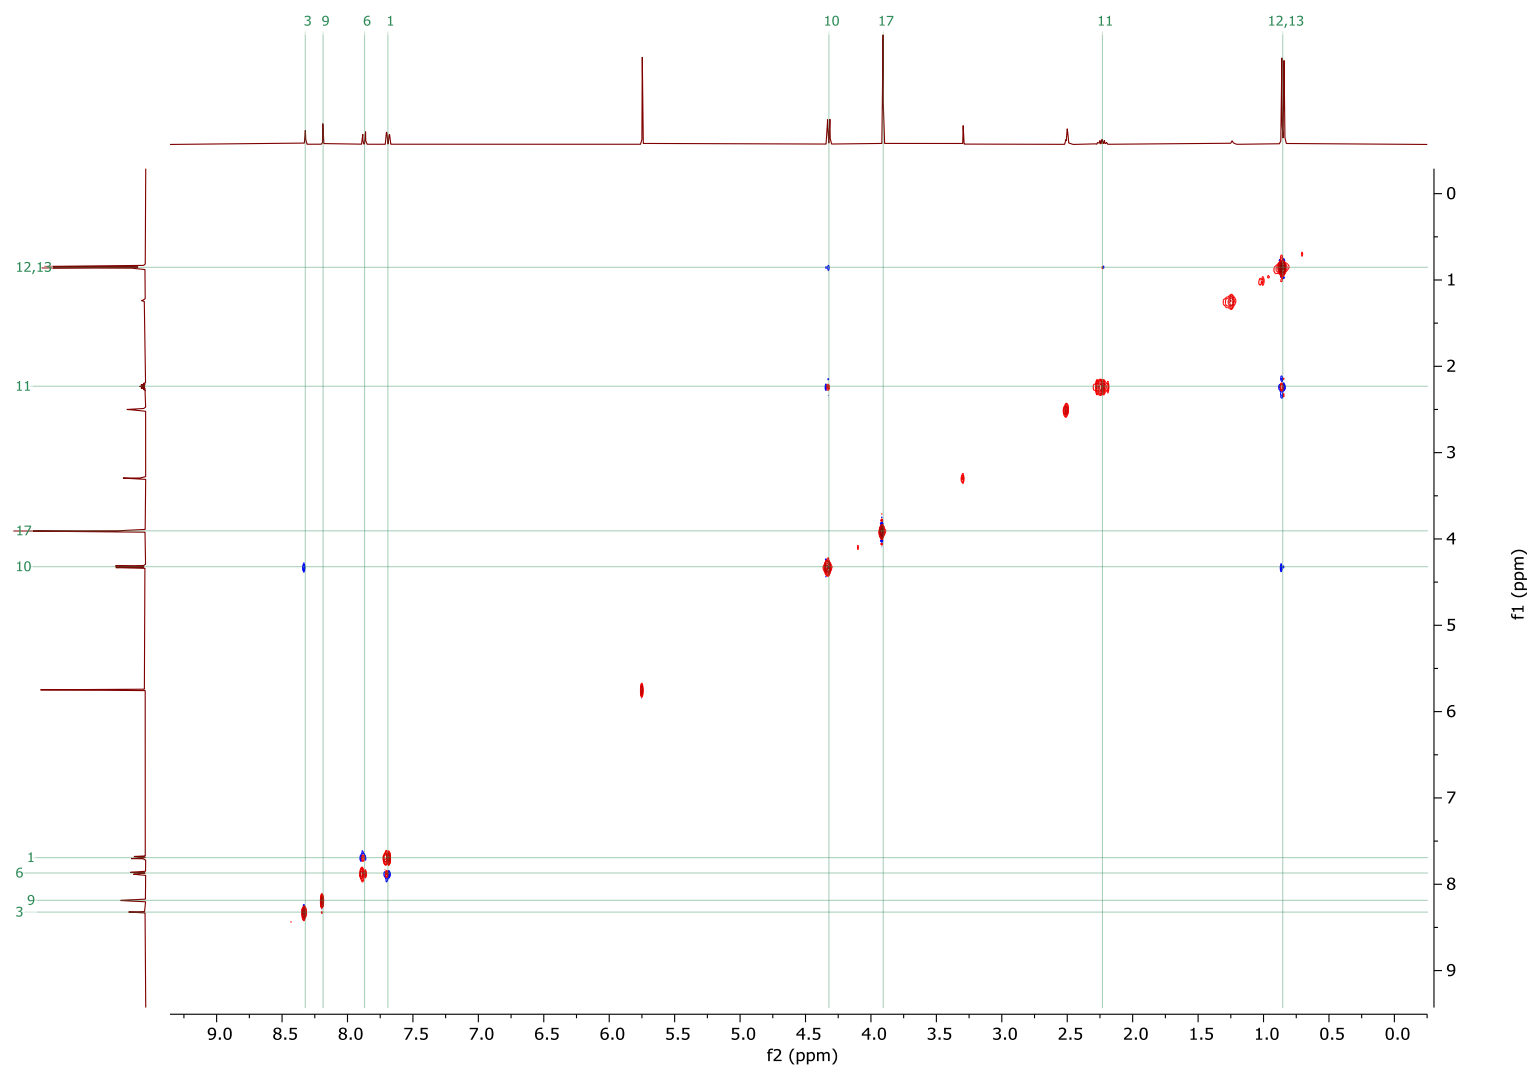

# 7-bromo-1-isobutyl-1H-indazole (2h)

<sup>1</sup>H NMR (400 MHz, DMSO-d<sub>6</sub>)

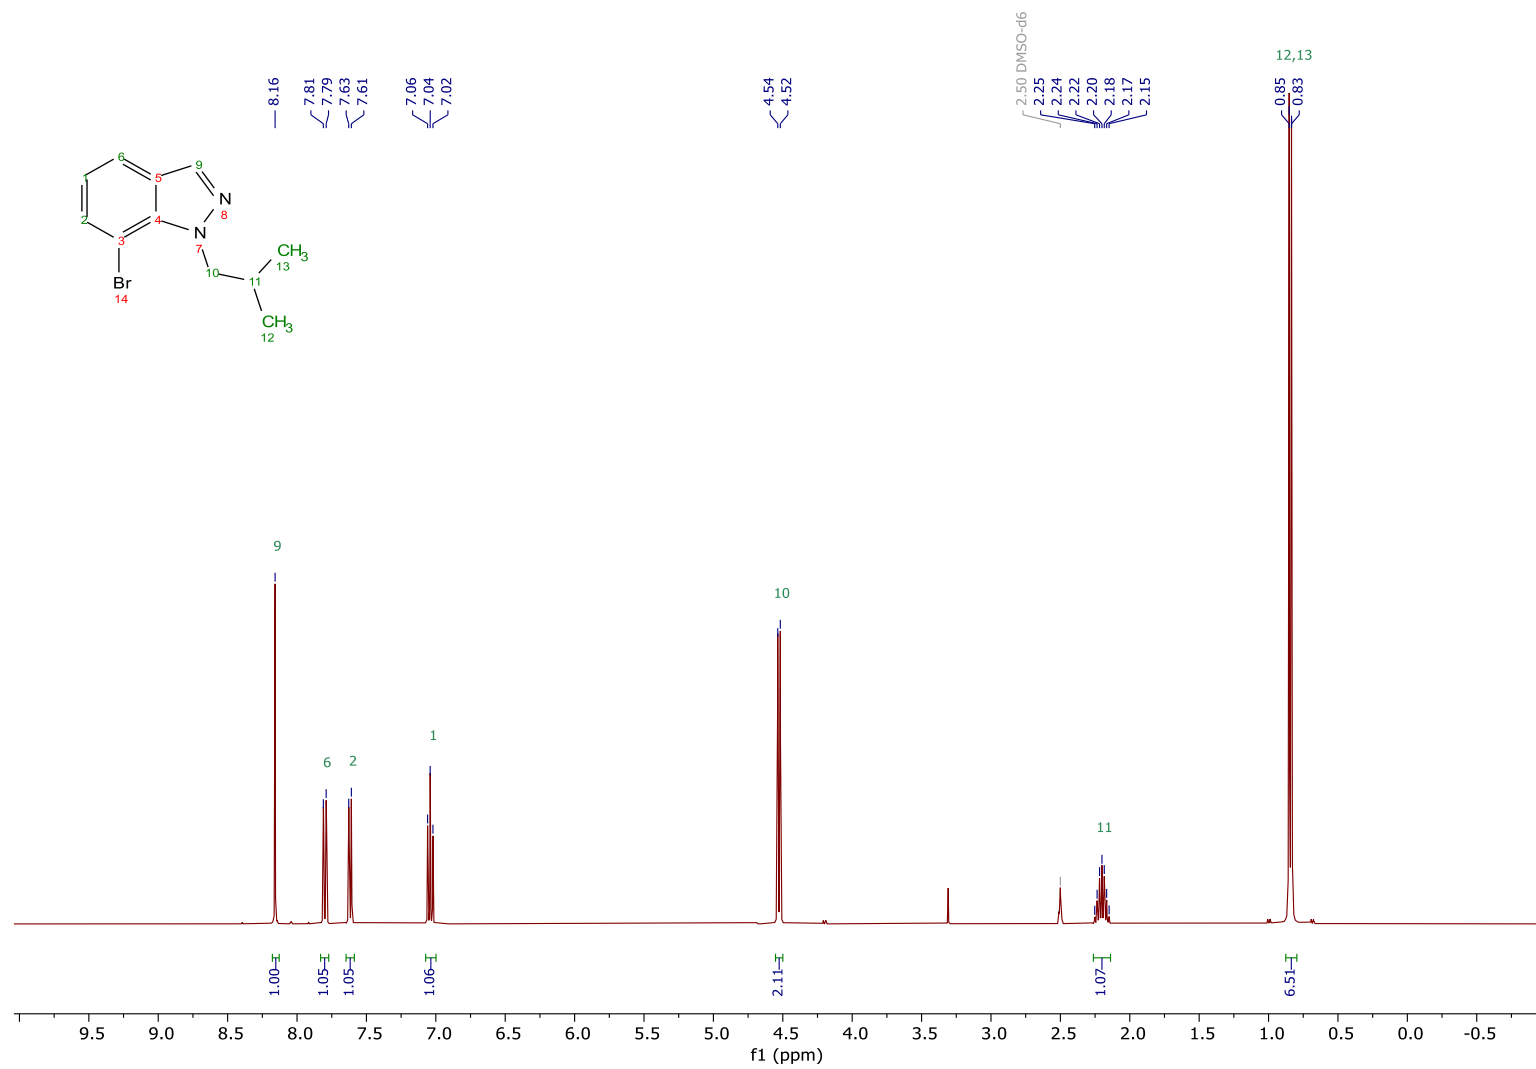

**$^{13}\text{C}$  NMR (101 MHz, DMSO- $d_6$ )**

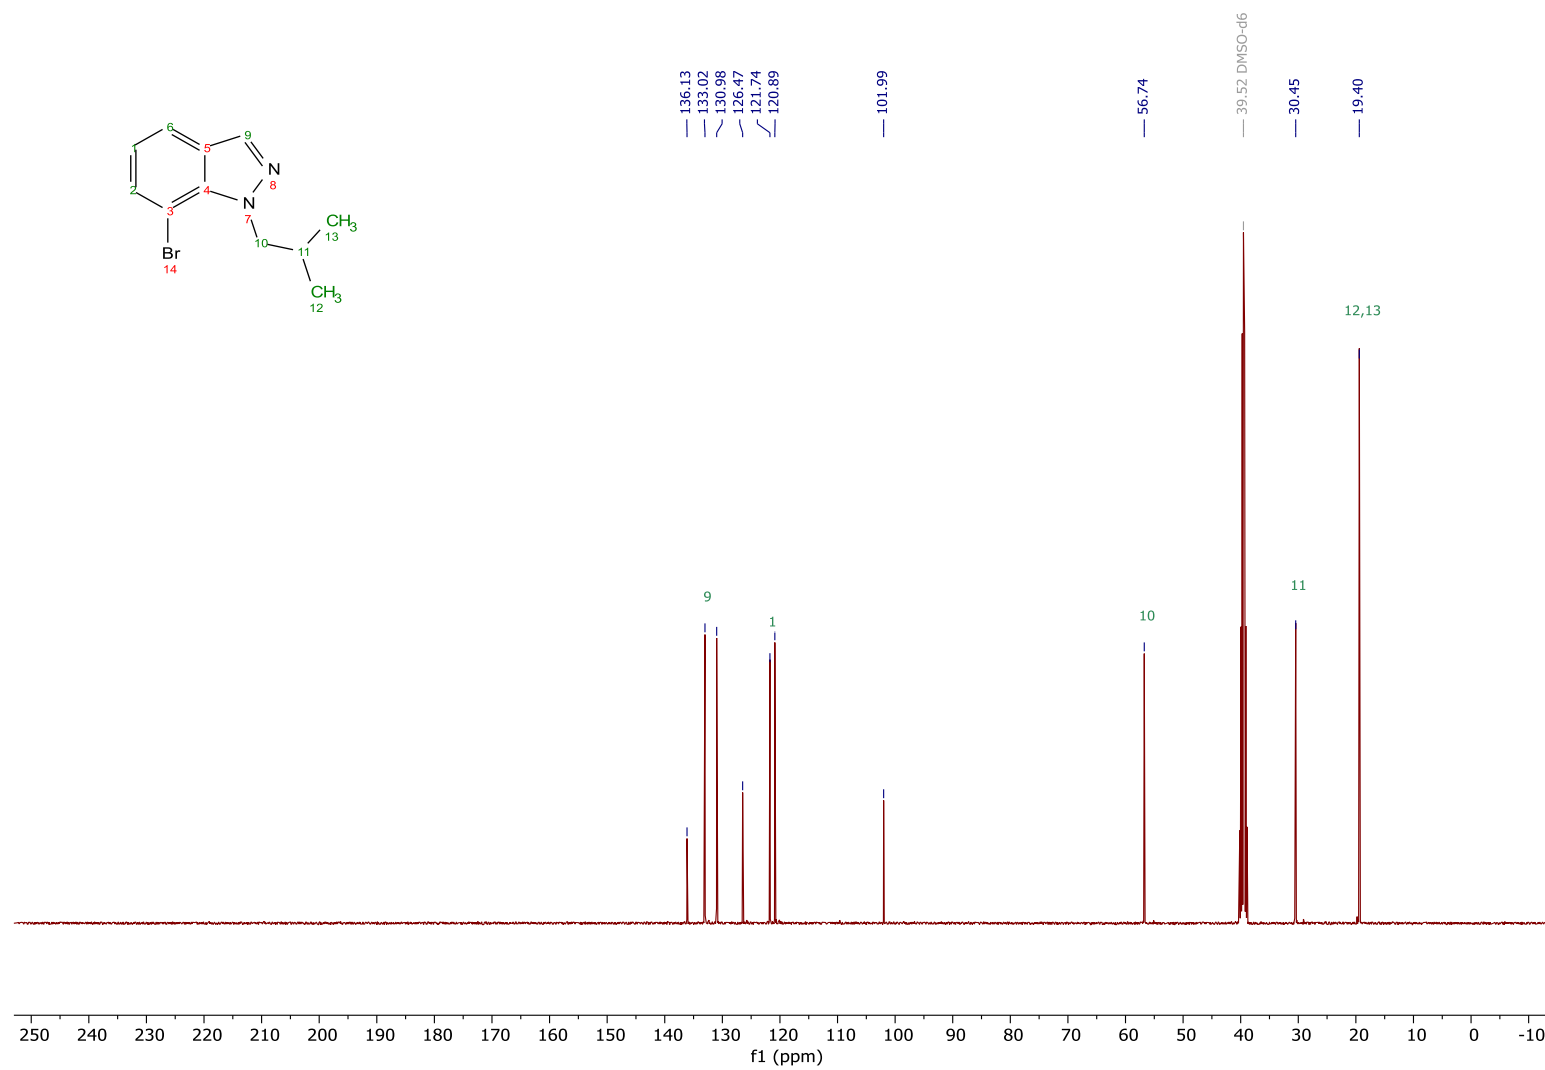

$^1\text{H}$ - $^1\text{H}$  COSY (400 MHz, DMSO- $d_6$ )

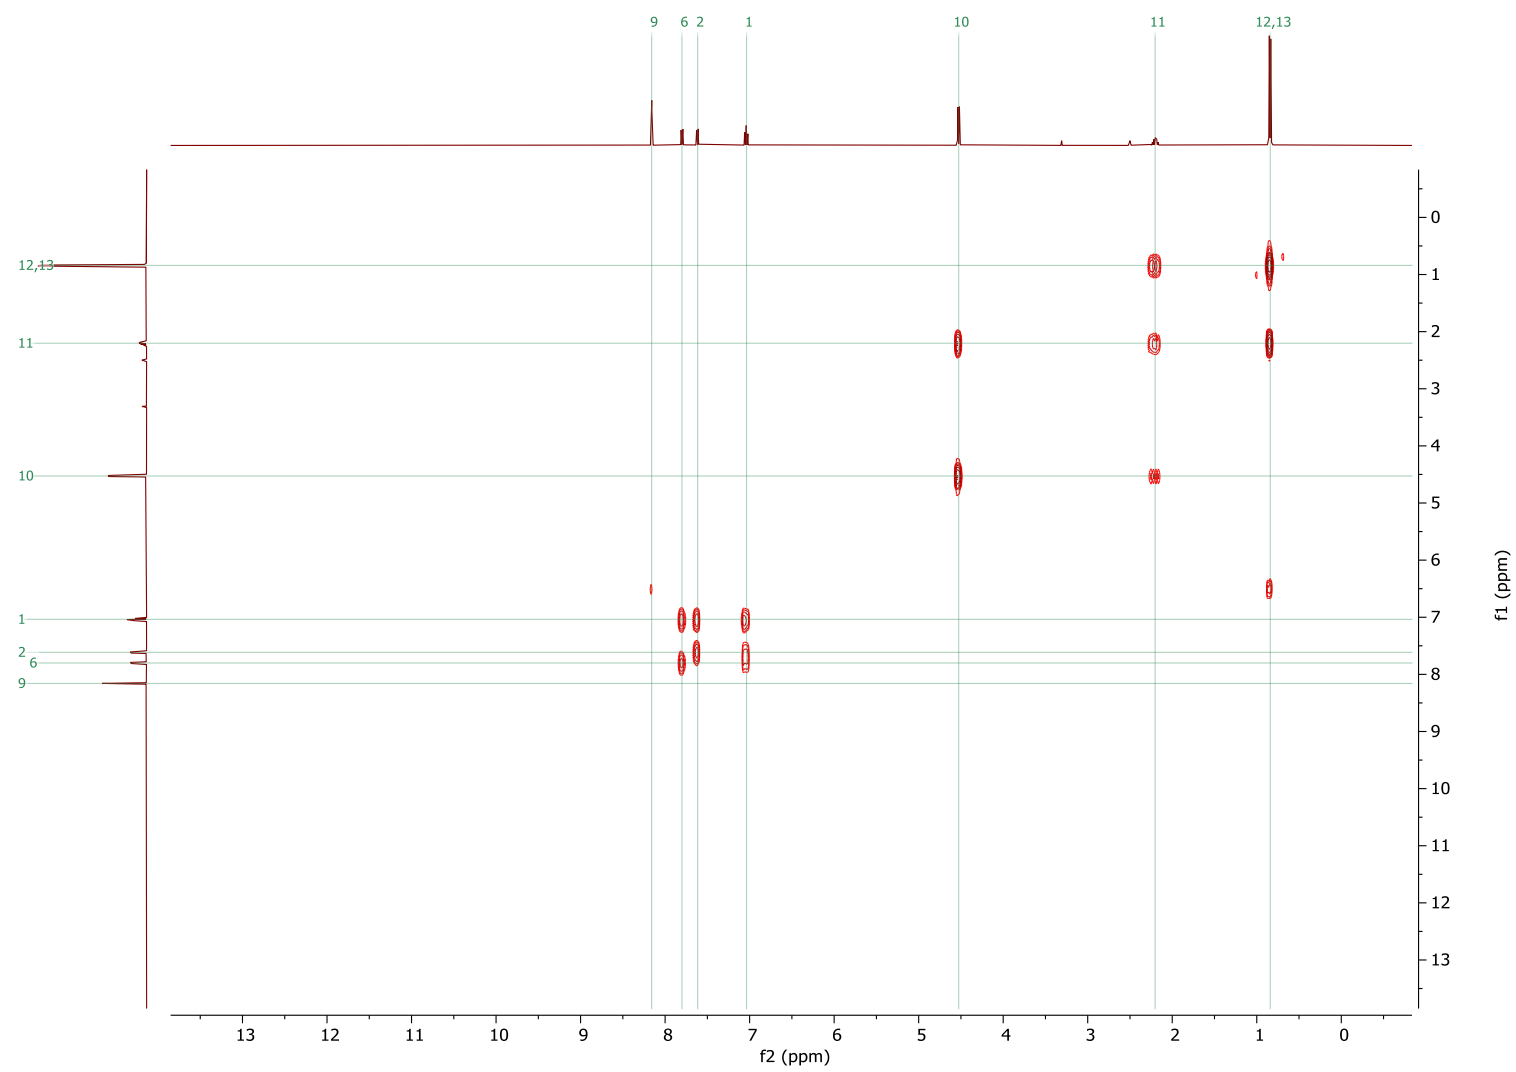

$^1\text{H}$ - $^{13}\text{C}$  HSQC (DMSO- $d_6$ )

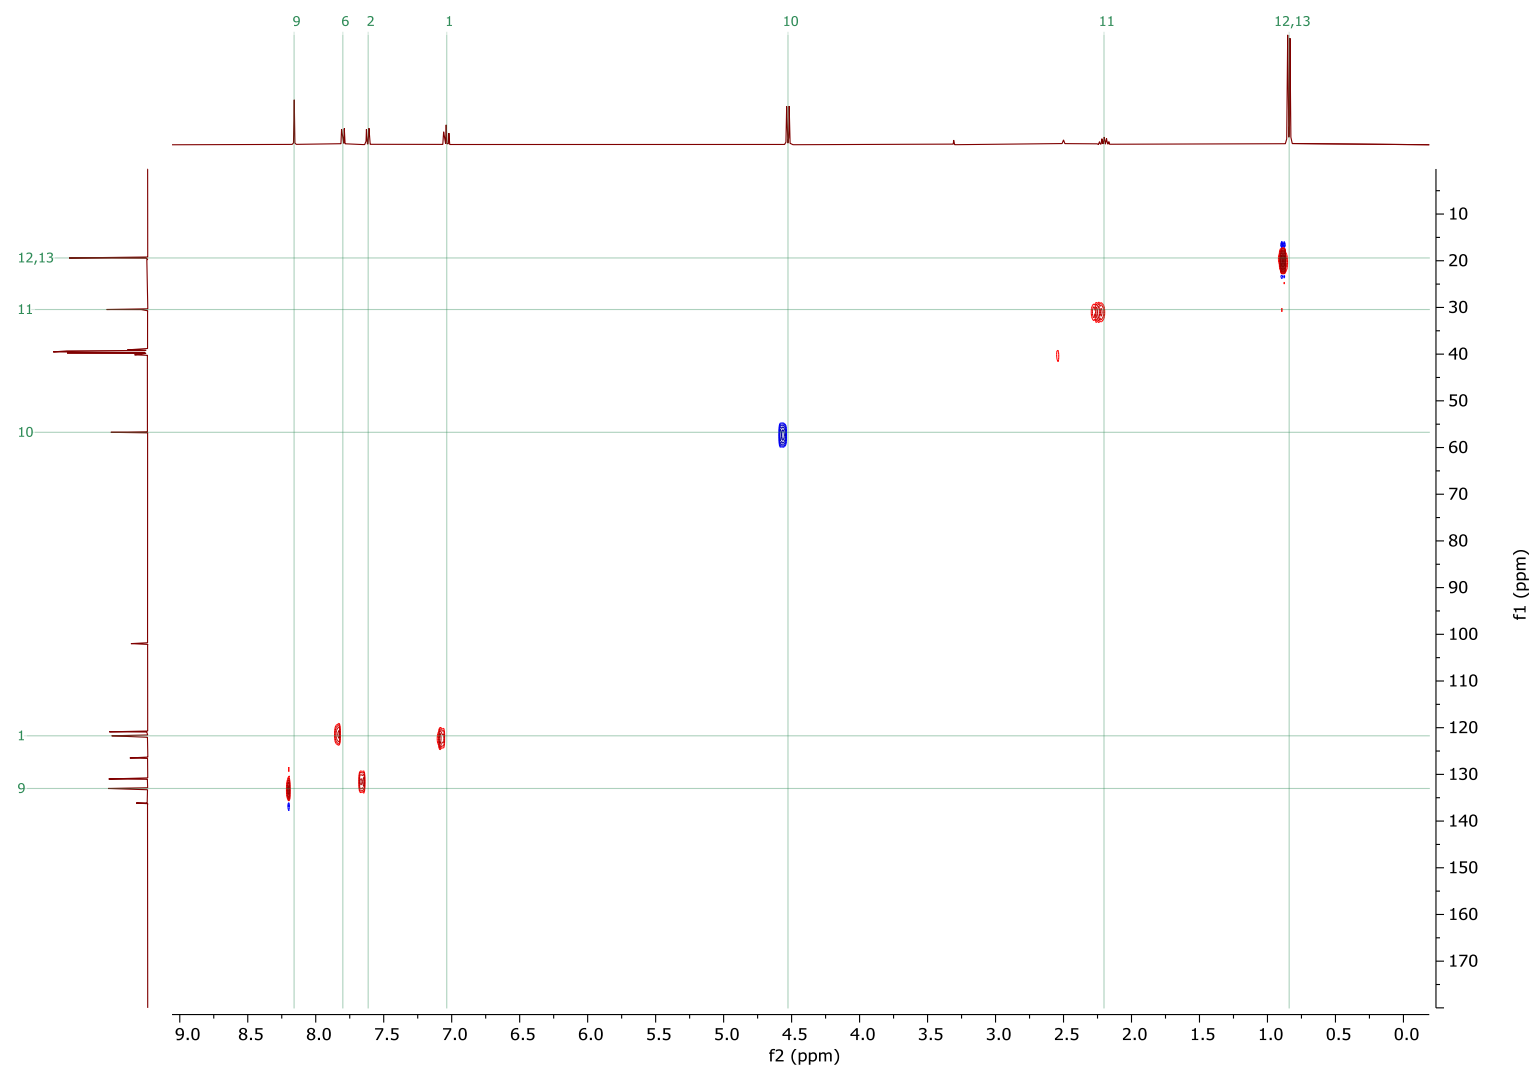

$^1\text{H}$ - $^{13}\text{C}$  HMBC (DMSO- $d_6$ )

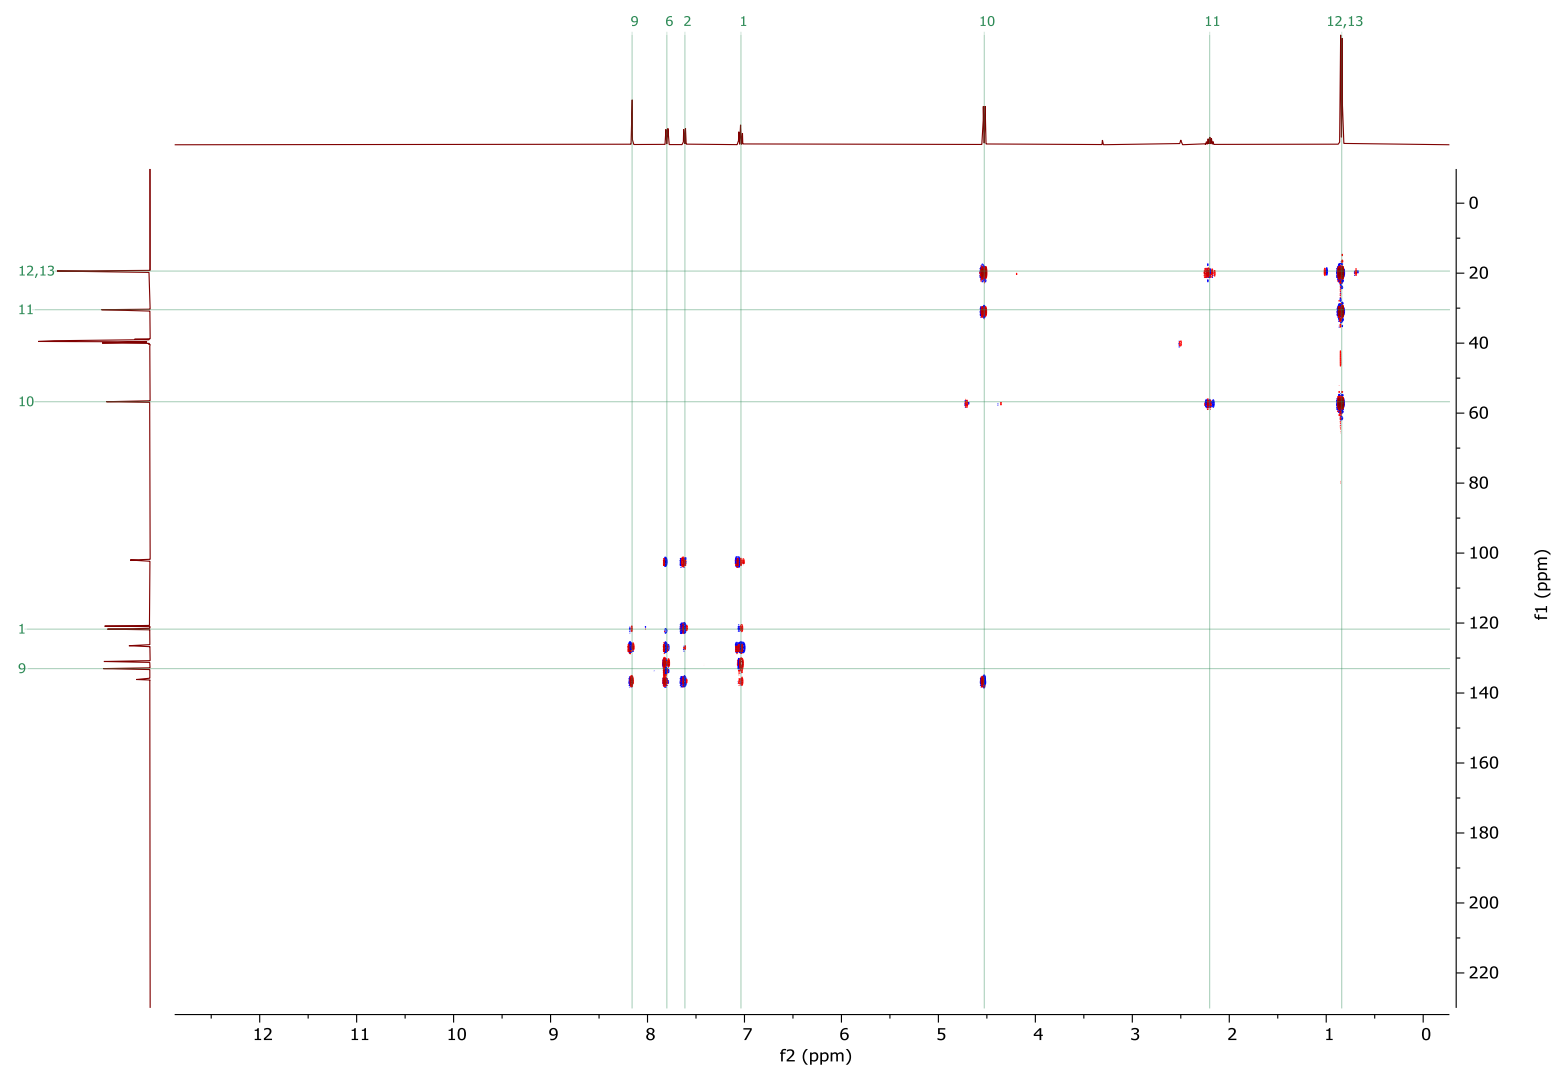

$^1\text{H}$ - $^1\text{H}$  NOESY (400 MHz, DMSO- $d_6$ )

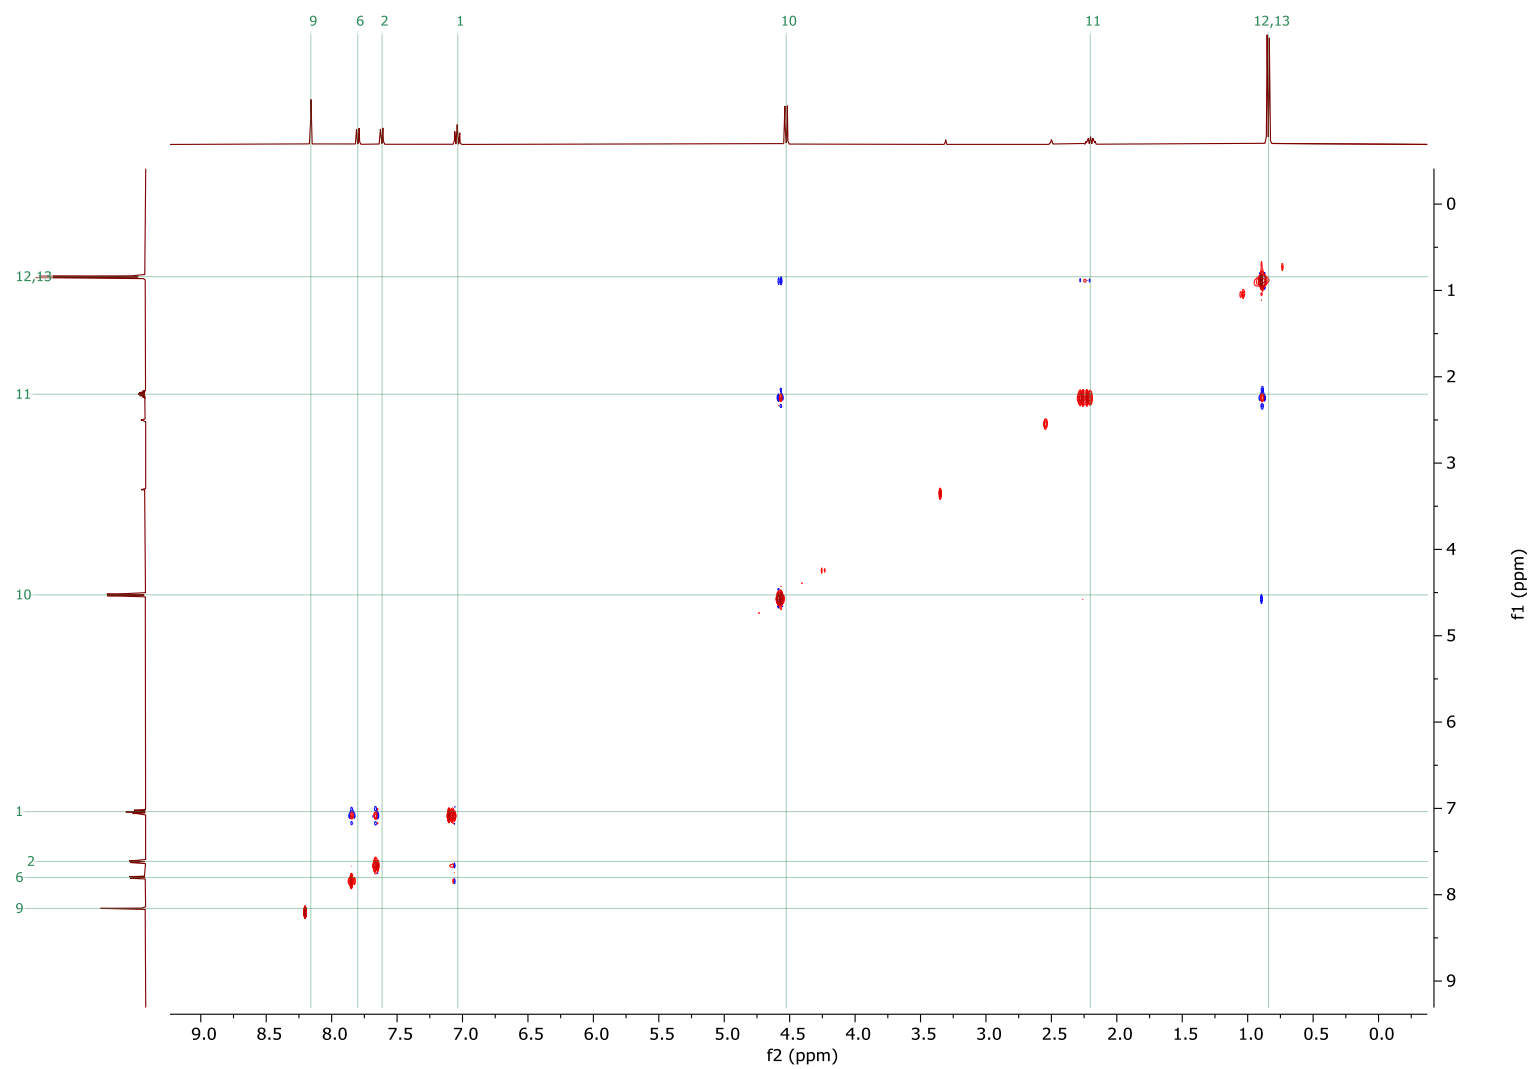

# 4-fluoro-1-isobutyl-1H-indazole (2i)

<sup>1</sup>H NMR (400 MHz, DMSO-d<sub>6</sub>)

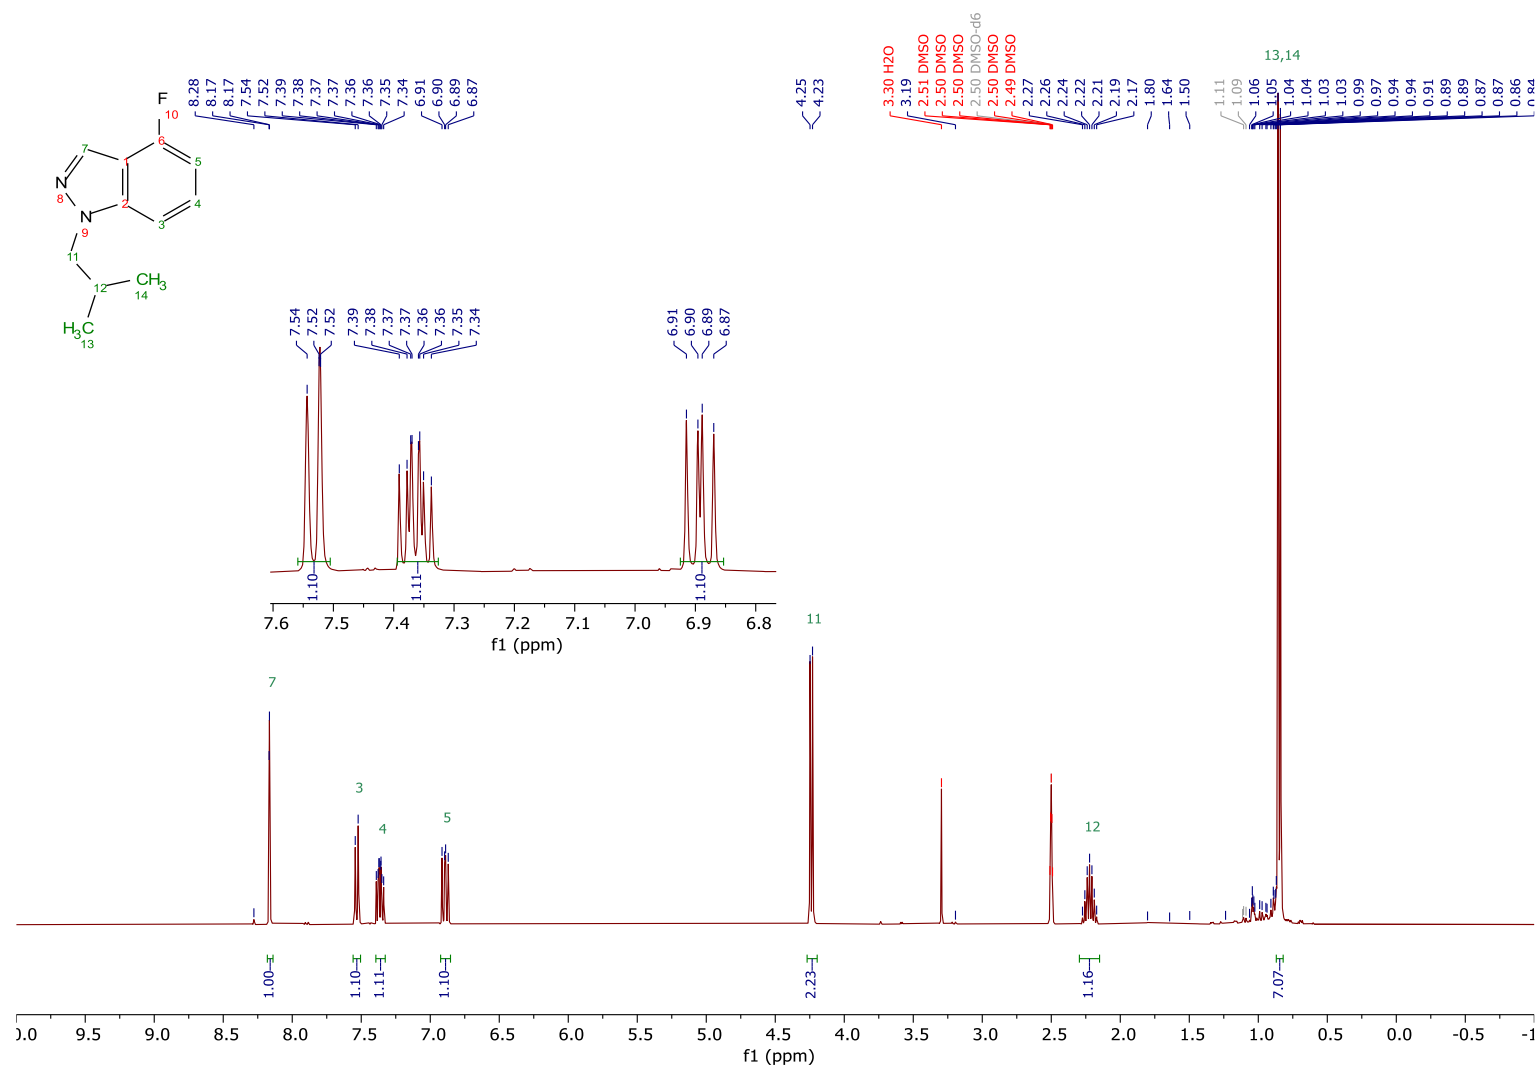

**$^{19}\text{F}$  NMR (376 MHz, DMSO- $d_6$ )**

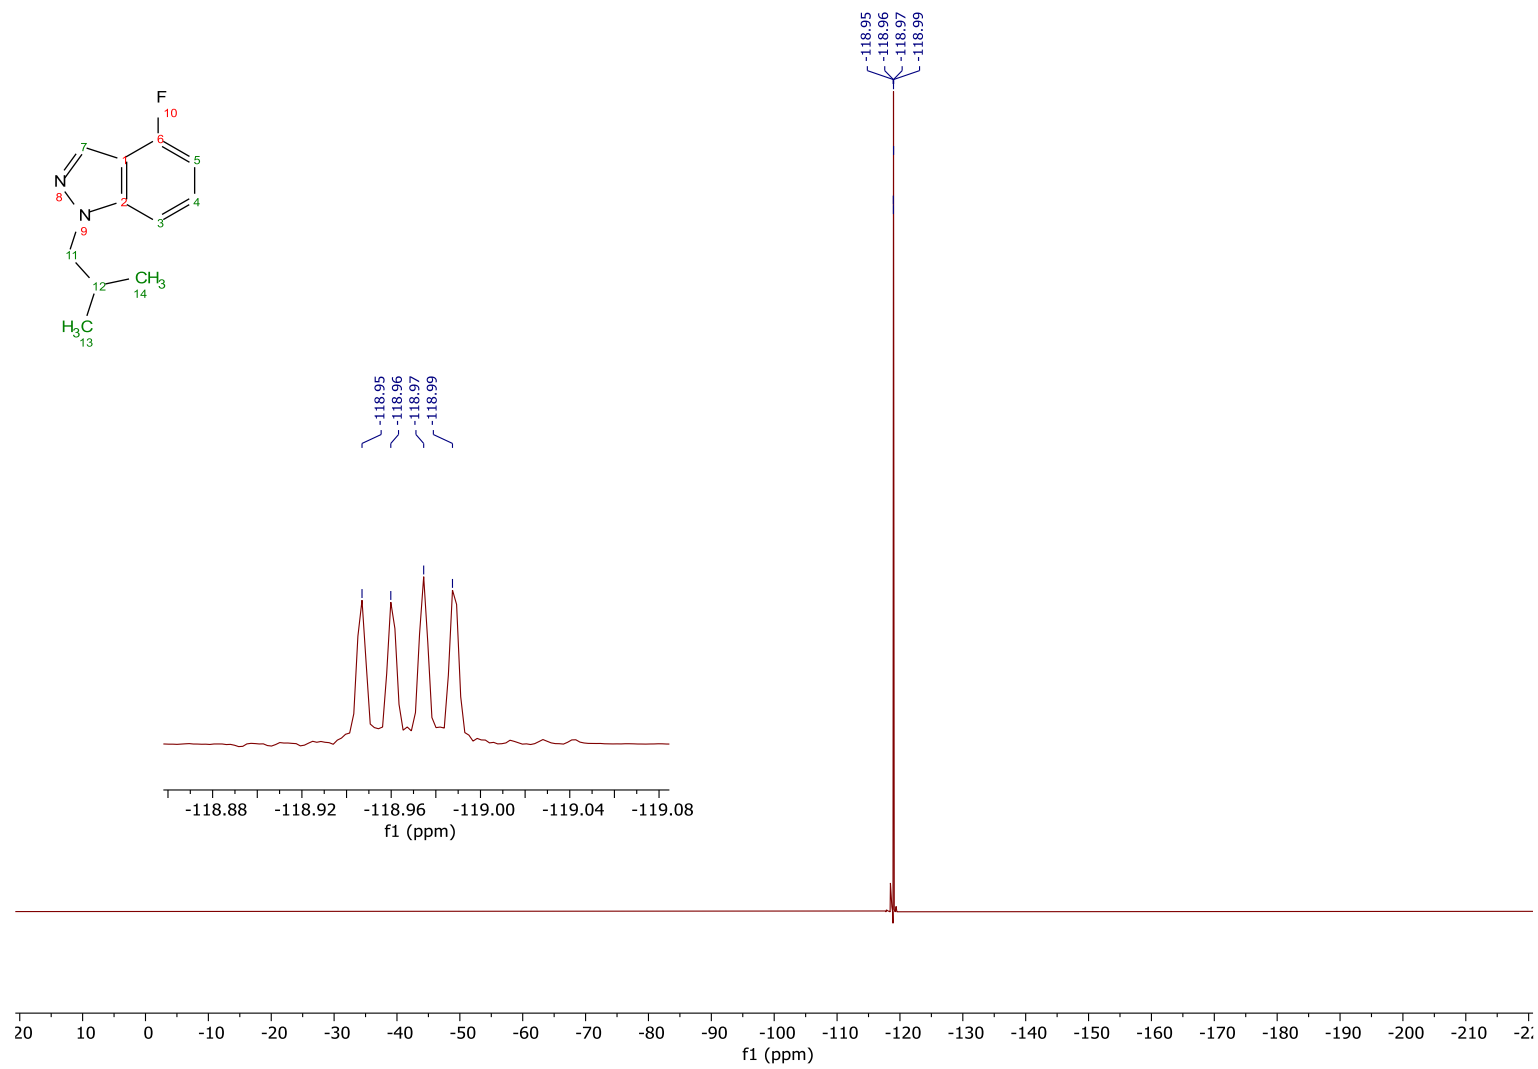

**$^{13}\text{C}$  NMR (101 MHz, DMSO- $d_6$ )**

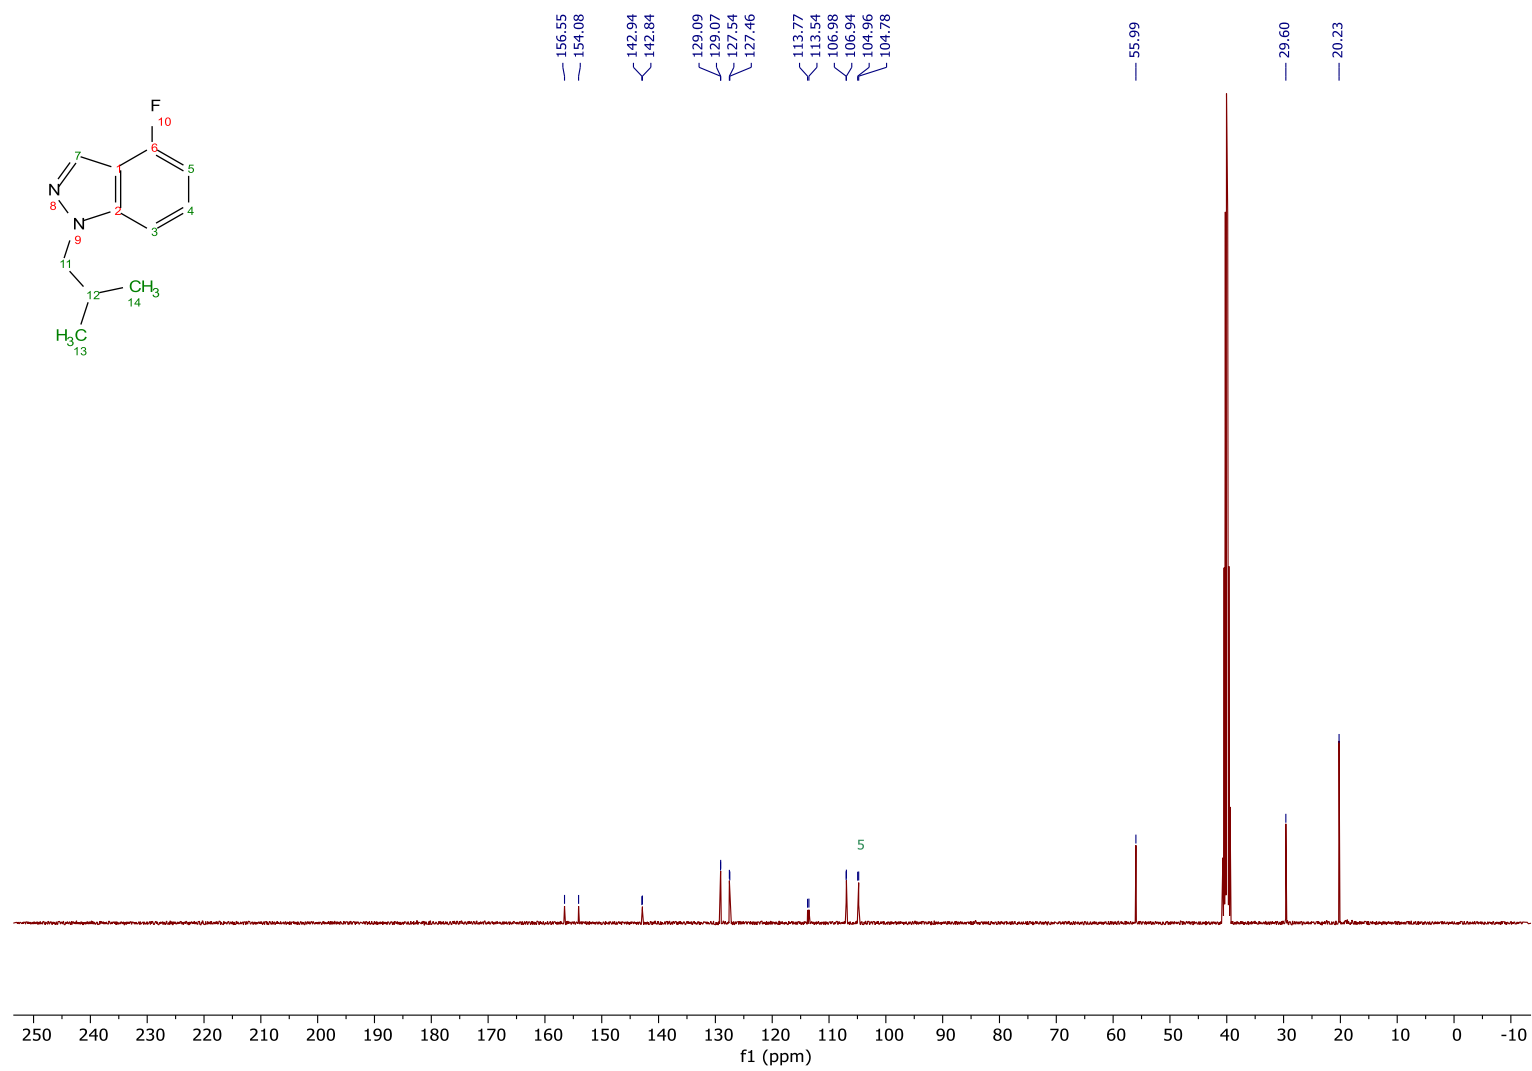

$^1\text{H}$ - $^{13}\text{C}$  HSQC (DMSO- $d_6$ )

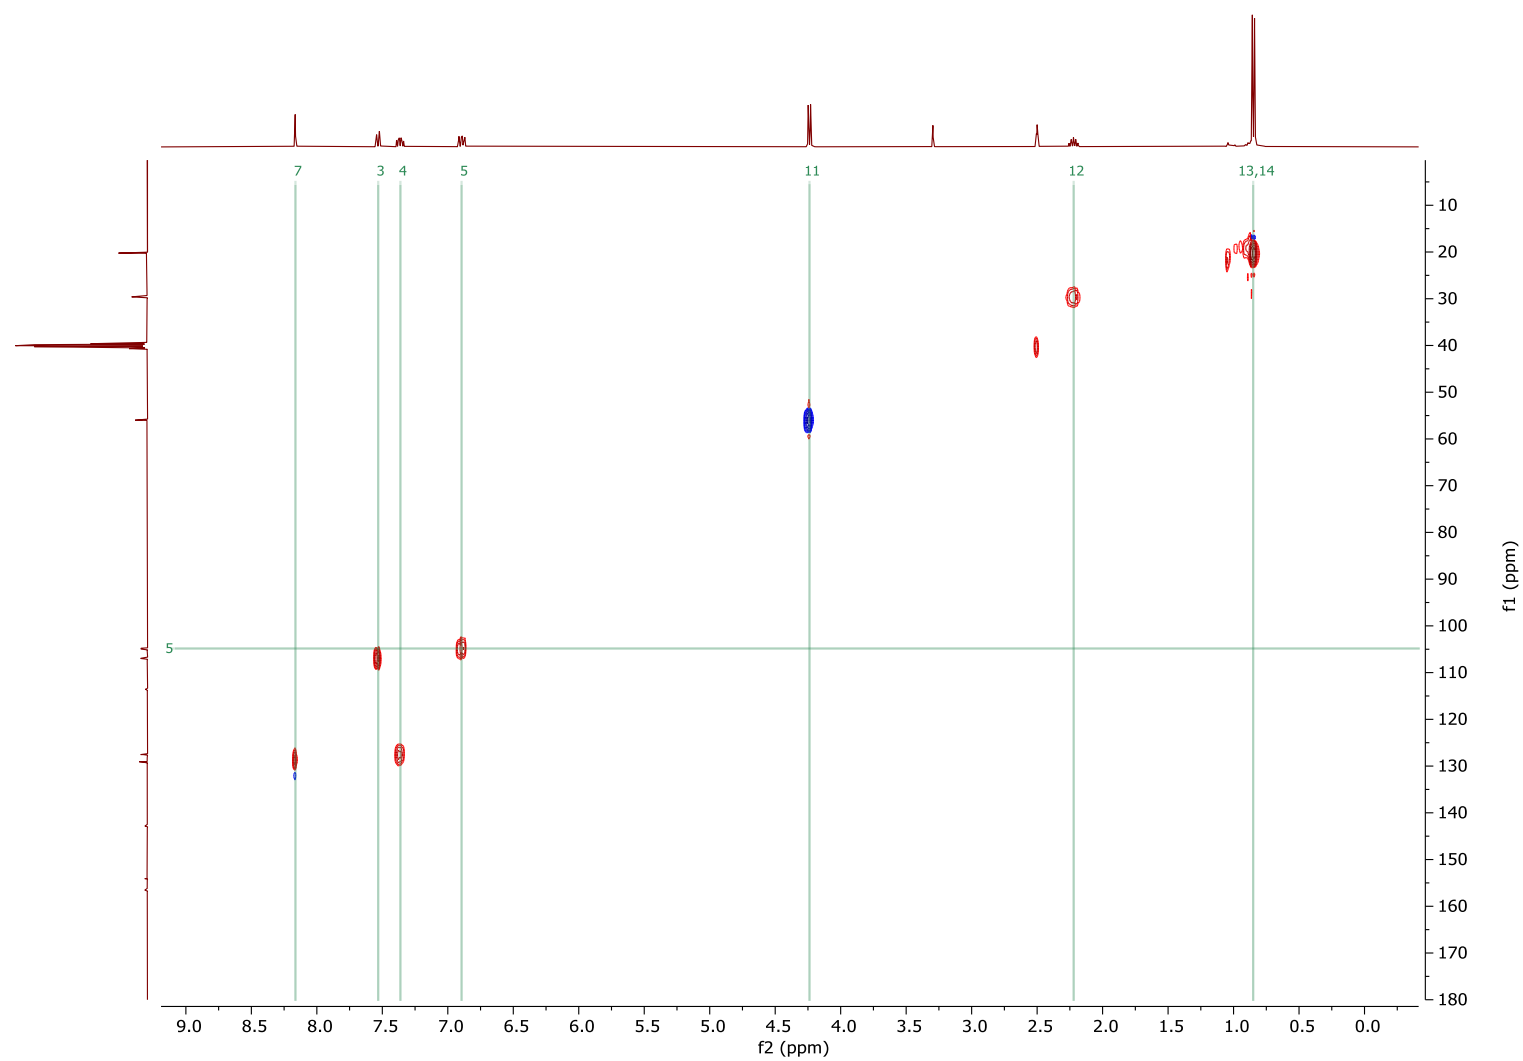

$^1\text{H}$ - $^{13}\text{C}$  HMBC (DMSO- $d_6$ )

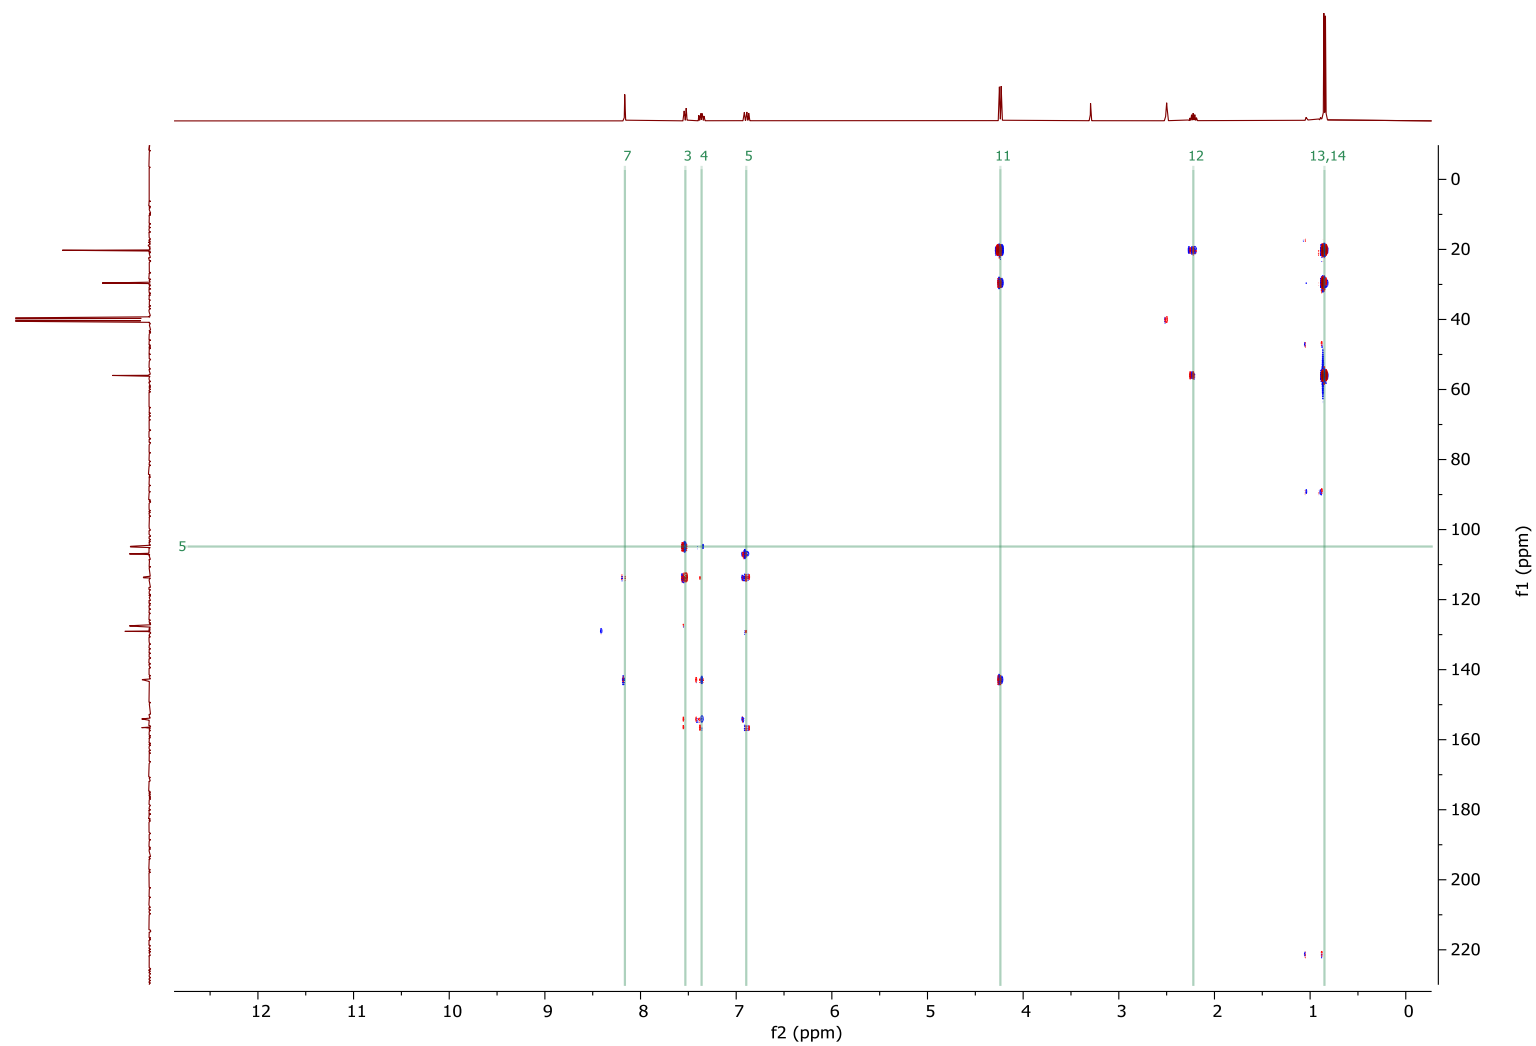

$^1\text{H}$ - $^1\text{H}$  NOESY (400 MHz, DMSO- $d_6$ )

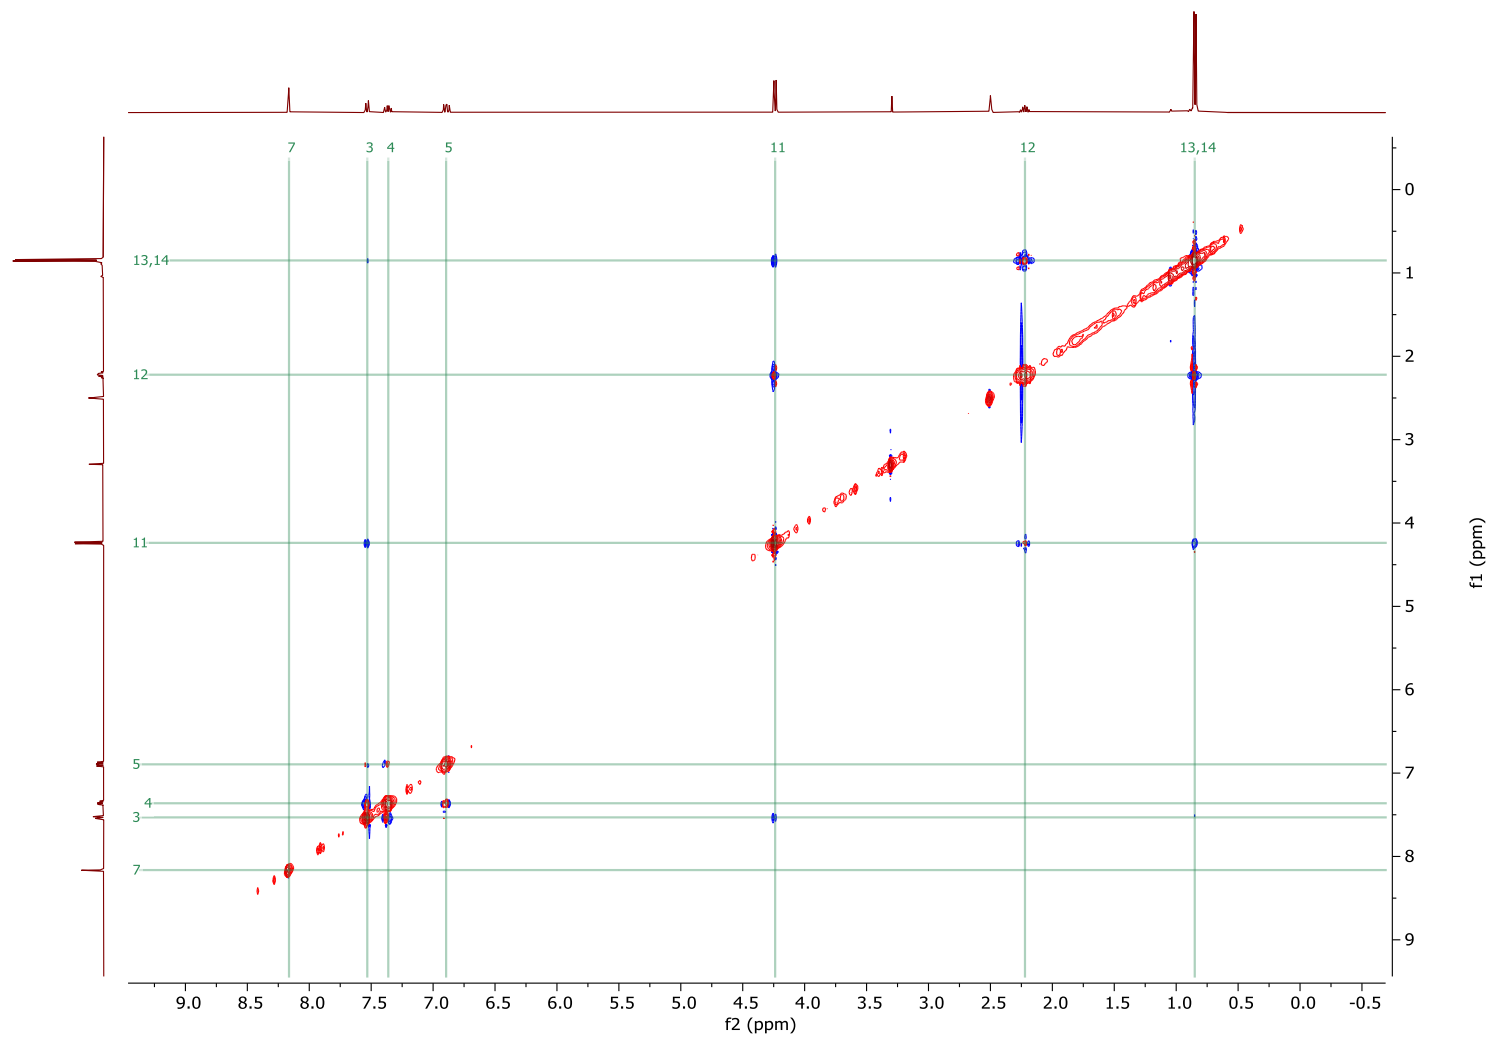

# Methyl 5-fluoro-1-isobutyl-1H-indazole-6-carboxylate (2j)

$^1\text{H}$  NMR (400 MHz,  $\text{DMSO}-d_6$ )

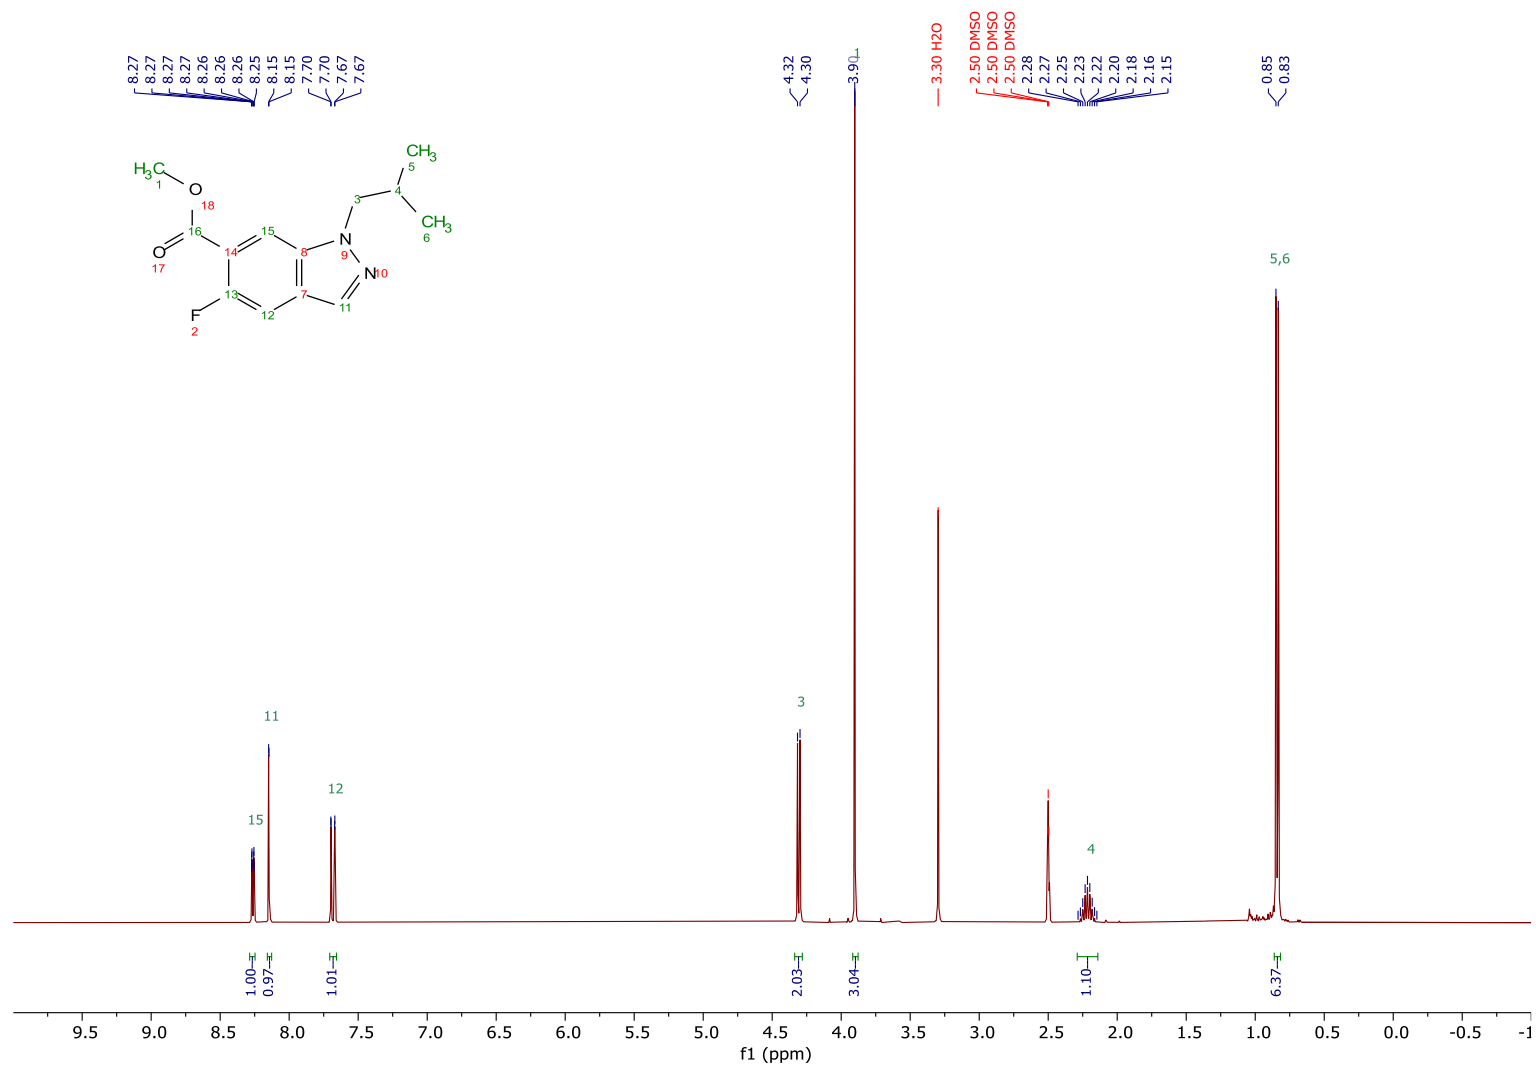

**$^{19}\text{F}$  NMR (376 MHz, DMSO- $d_6$ )**

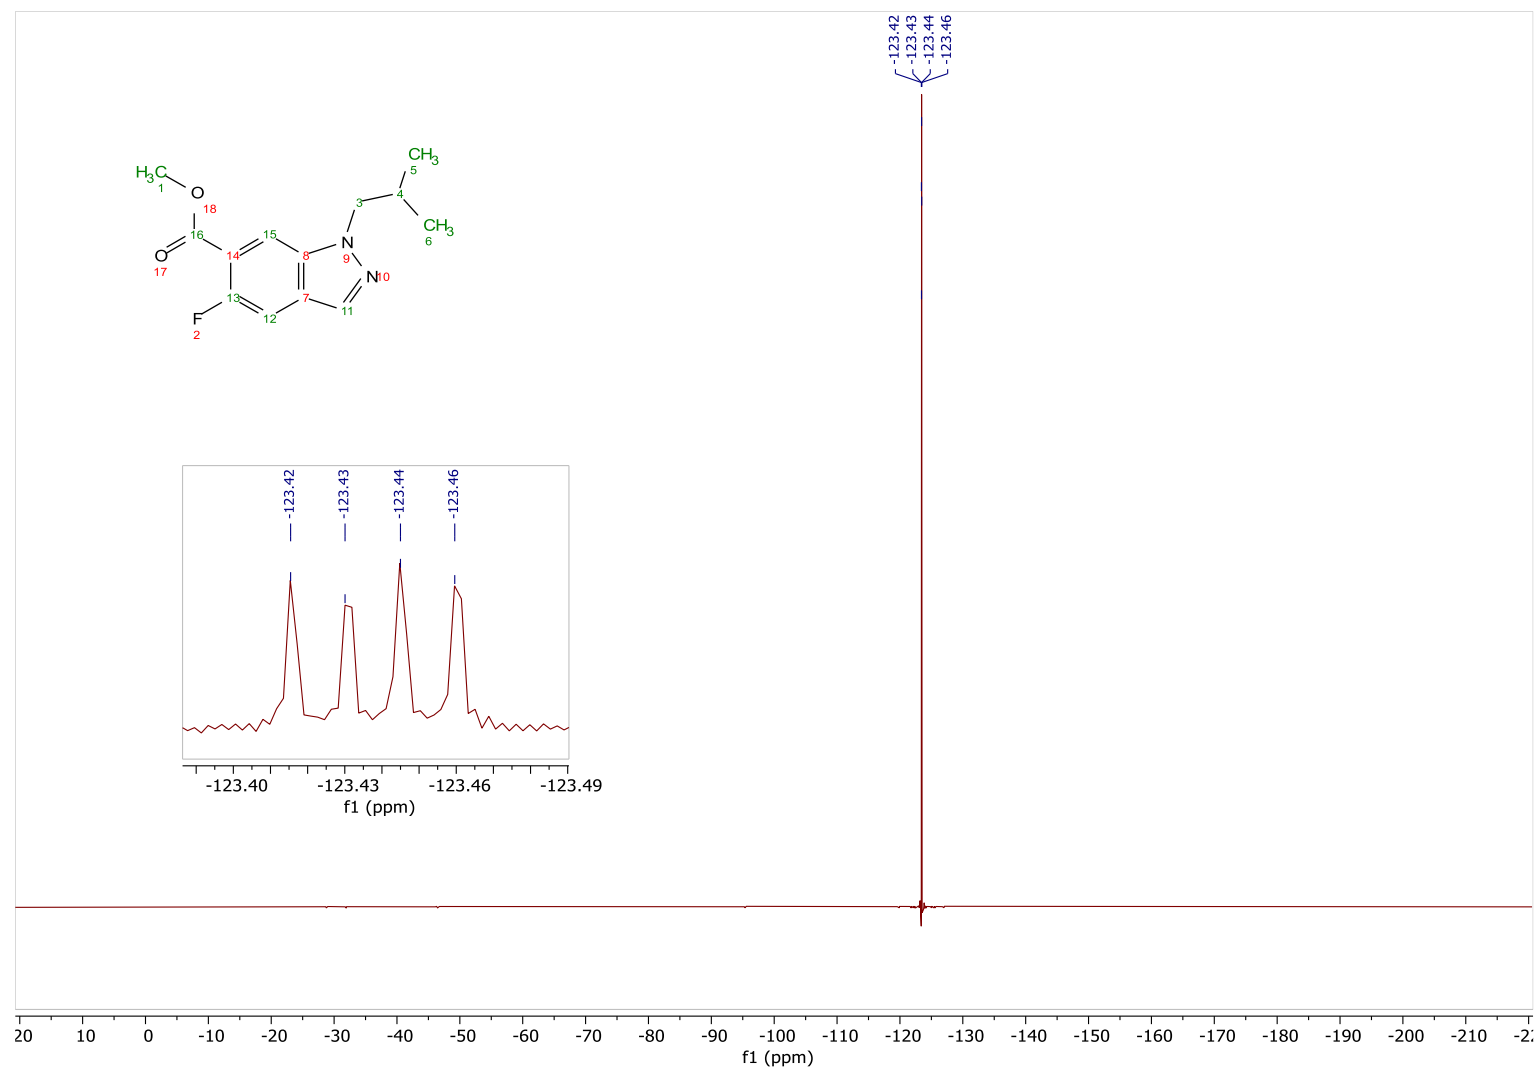

**$^{13}\text{C}$  NMR (101 MHz, DMSO- $d_6$ )**

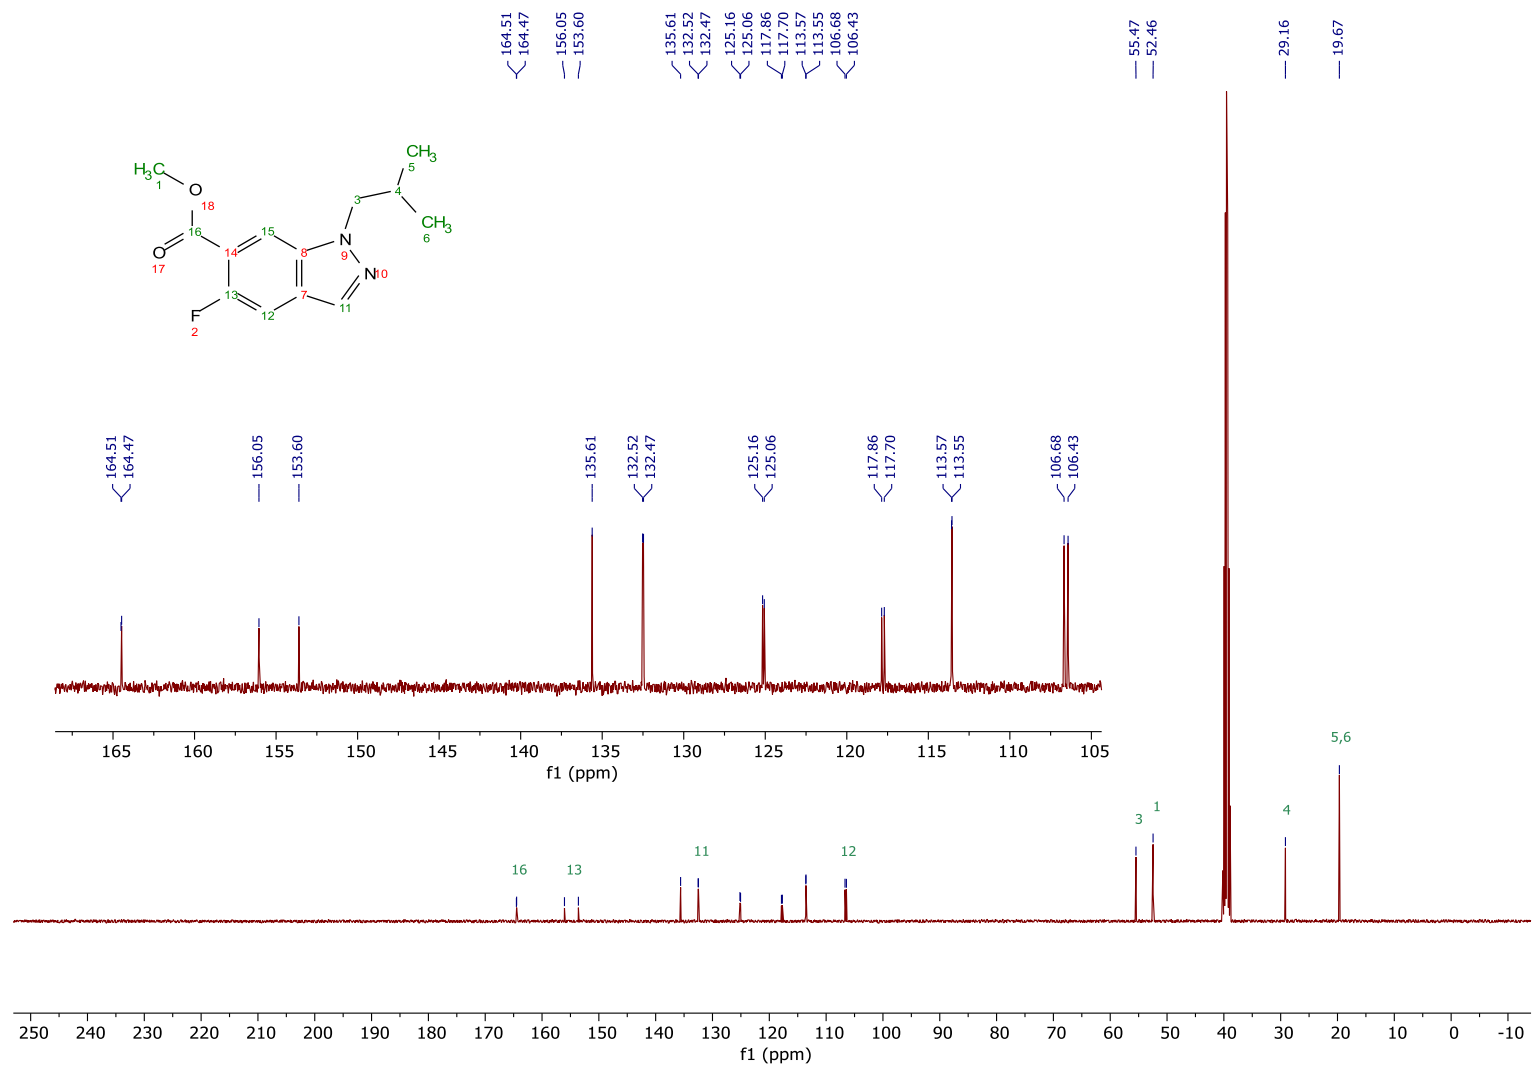

$^1\text{H}$ - $^{13}\text{C}$  HSQC (DMSO- $d_6$ )

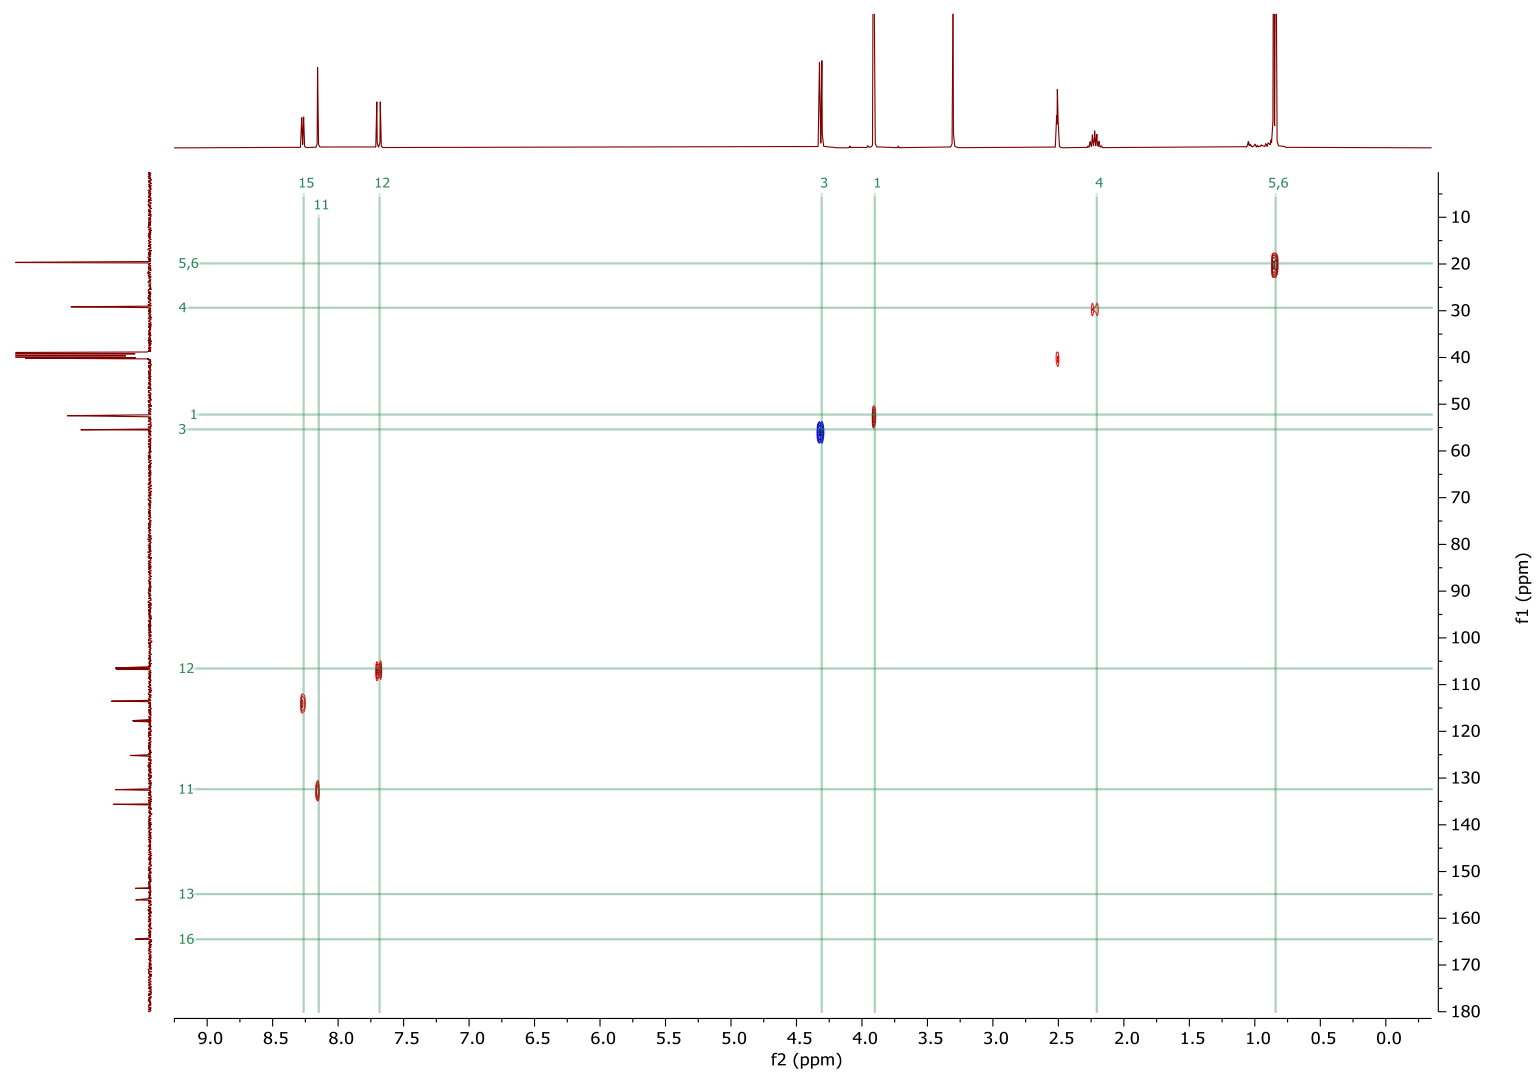

$^1\text{H}$ - $^{13}\text{C}$  HMBC (DMSO- $d_6$ )

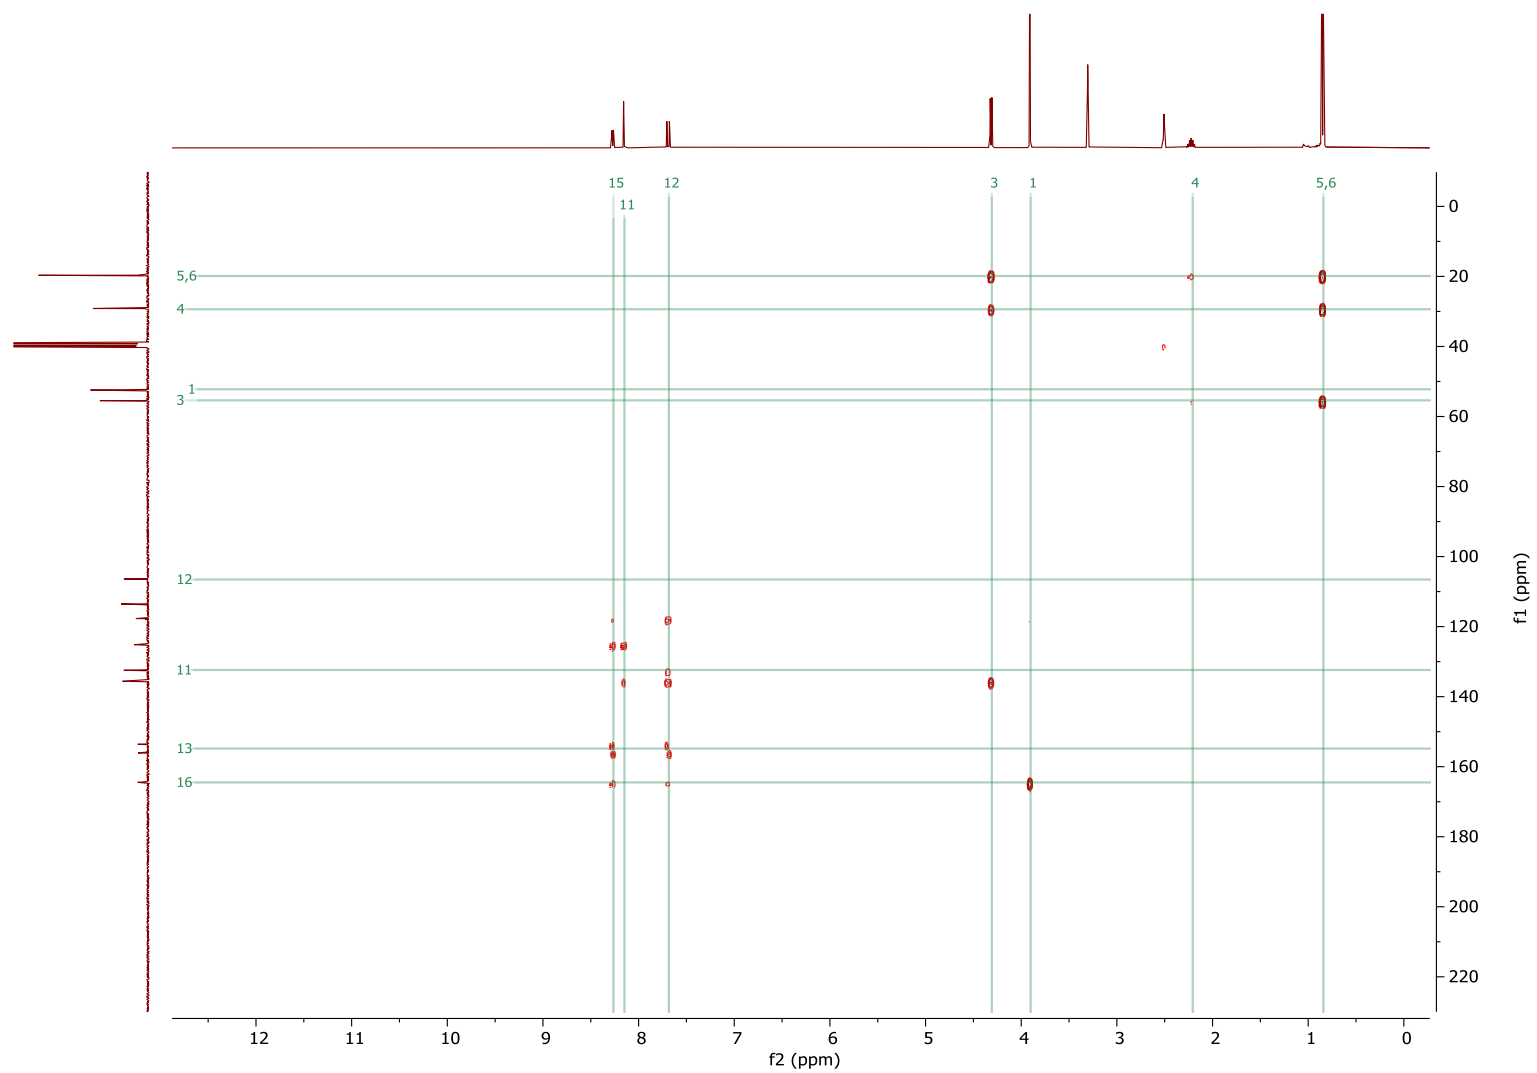

$^1\text{H}$ - $^1\text{H}$  NOESY (400 MHz, DMSO- $d_6$ )

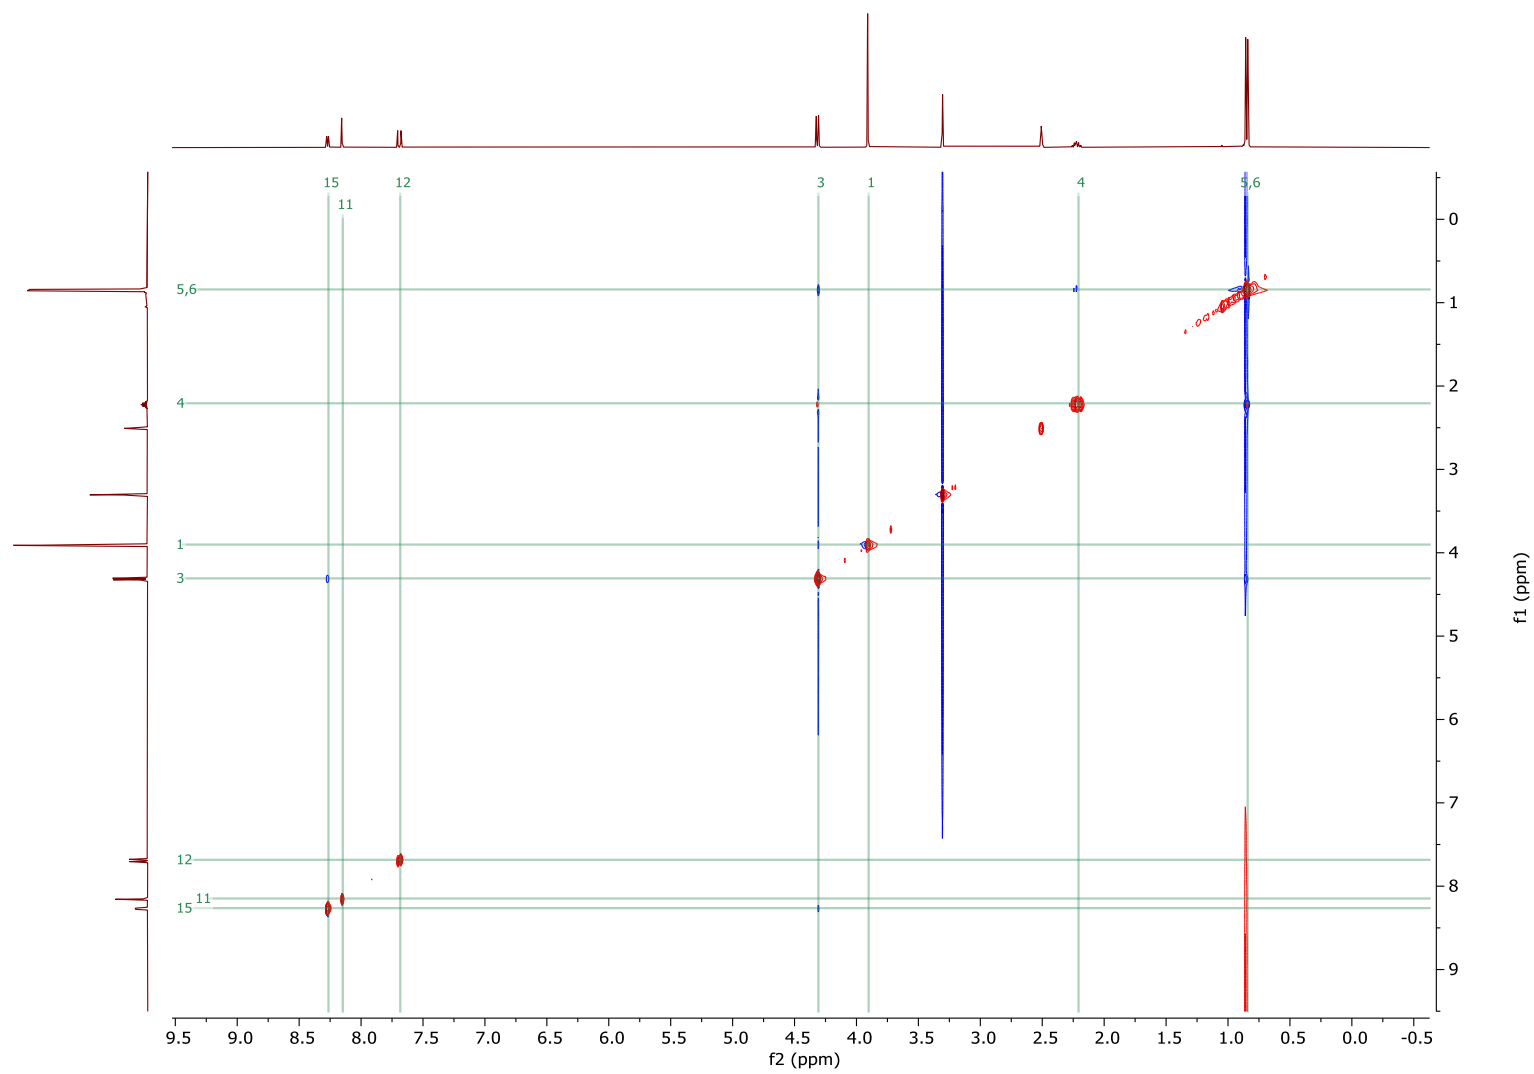

# 1-isobutyl-5-methoxy-1H-indazole (2k)

<sup>1</sup>H NMR (400 MHz, DMSO-d<sub>6</sub>)

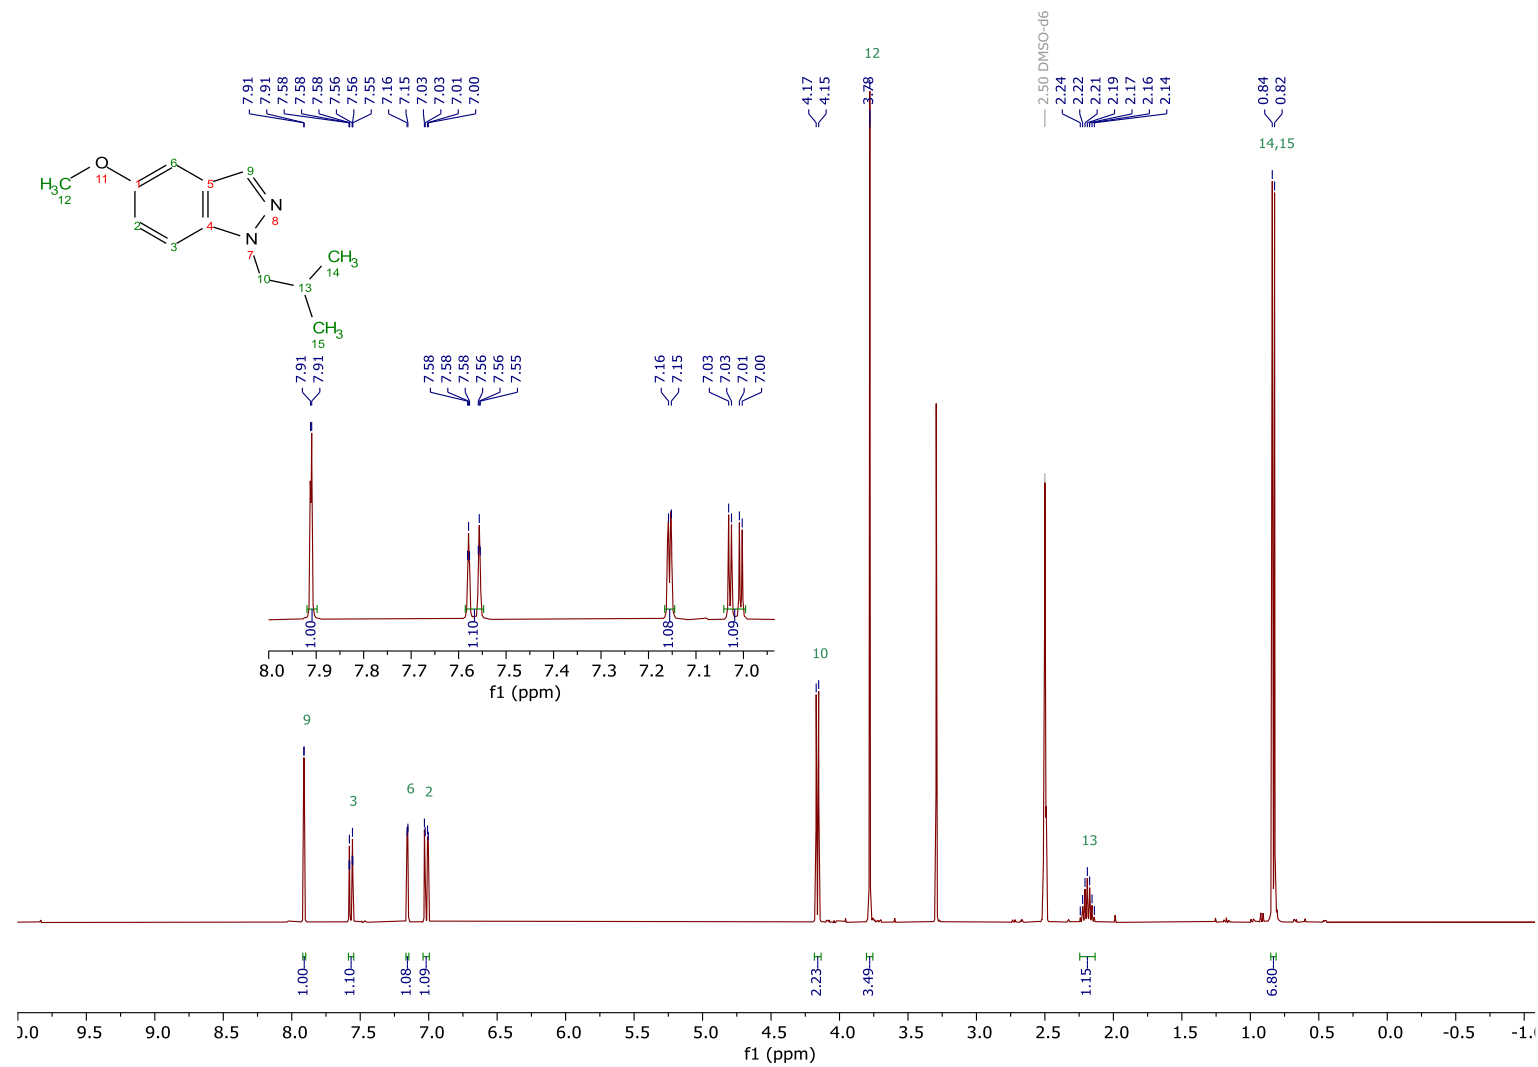

**$^{13}\text{C}$  NMR (101 MHz, DMSO- $d_6$ )**

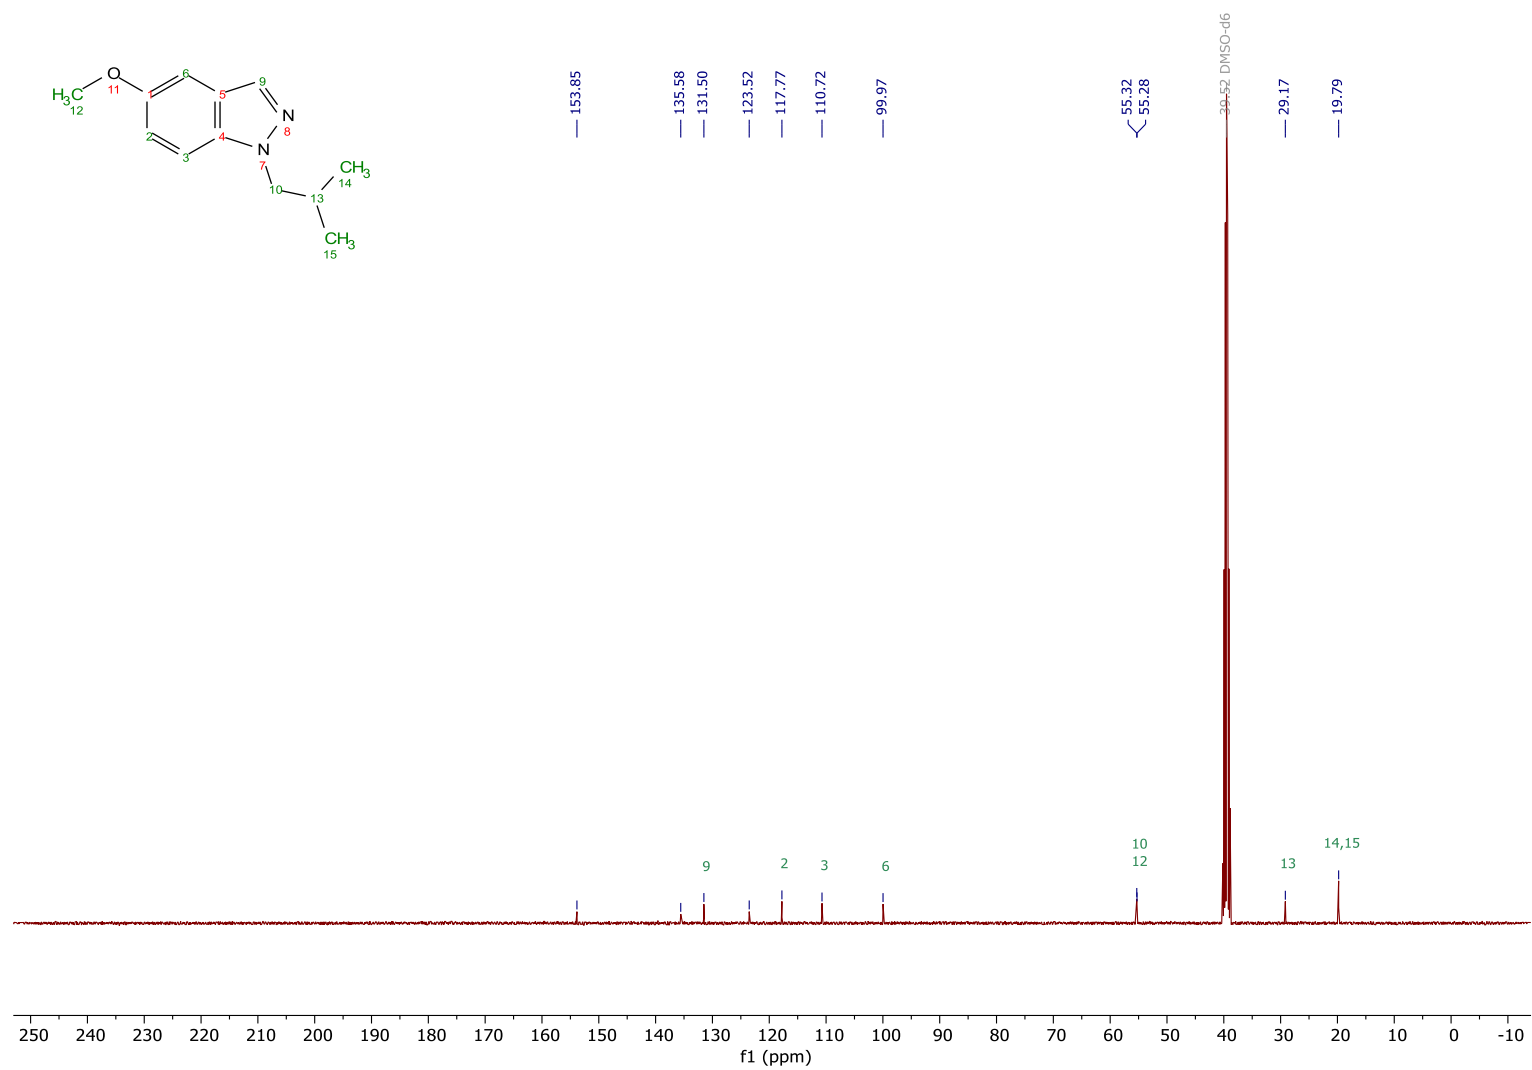

$^1\text{H}$ - $^1\text{H}$  COSY (400 MHz, DMSO- $d_6$ )

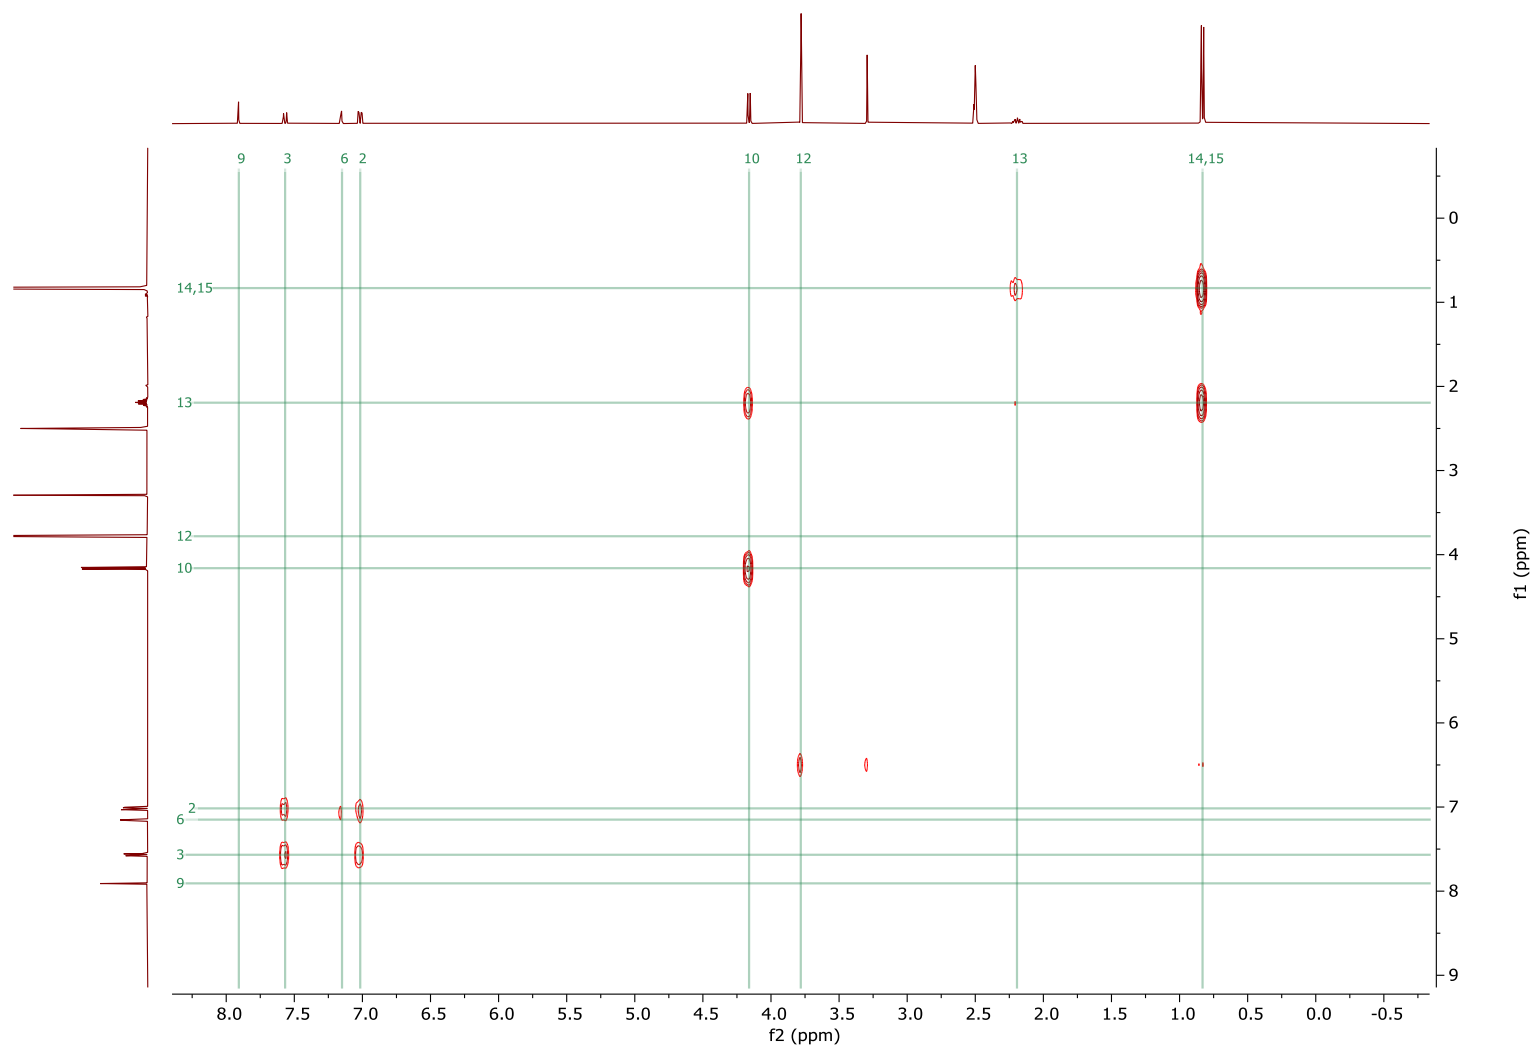

$^1\text{H}$ - $^{13}\text{C}$  HSQC (DMSO- $d_6$ )

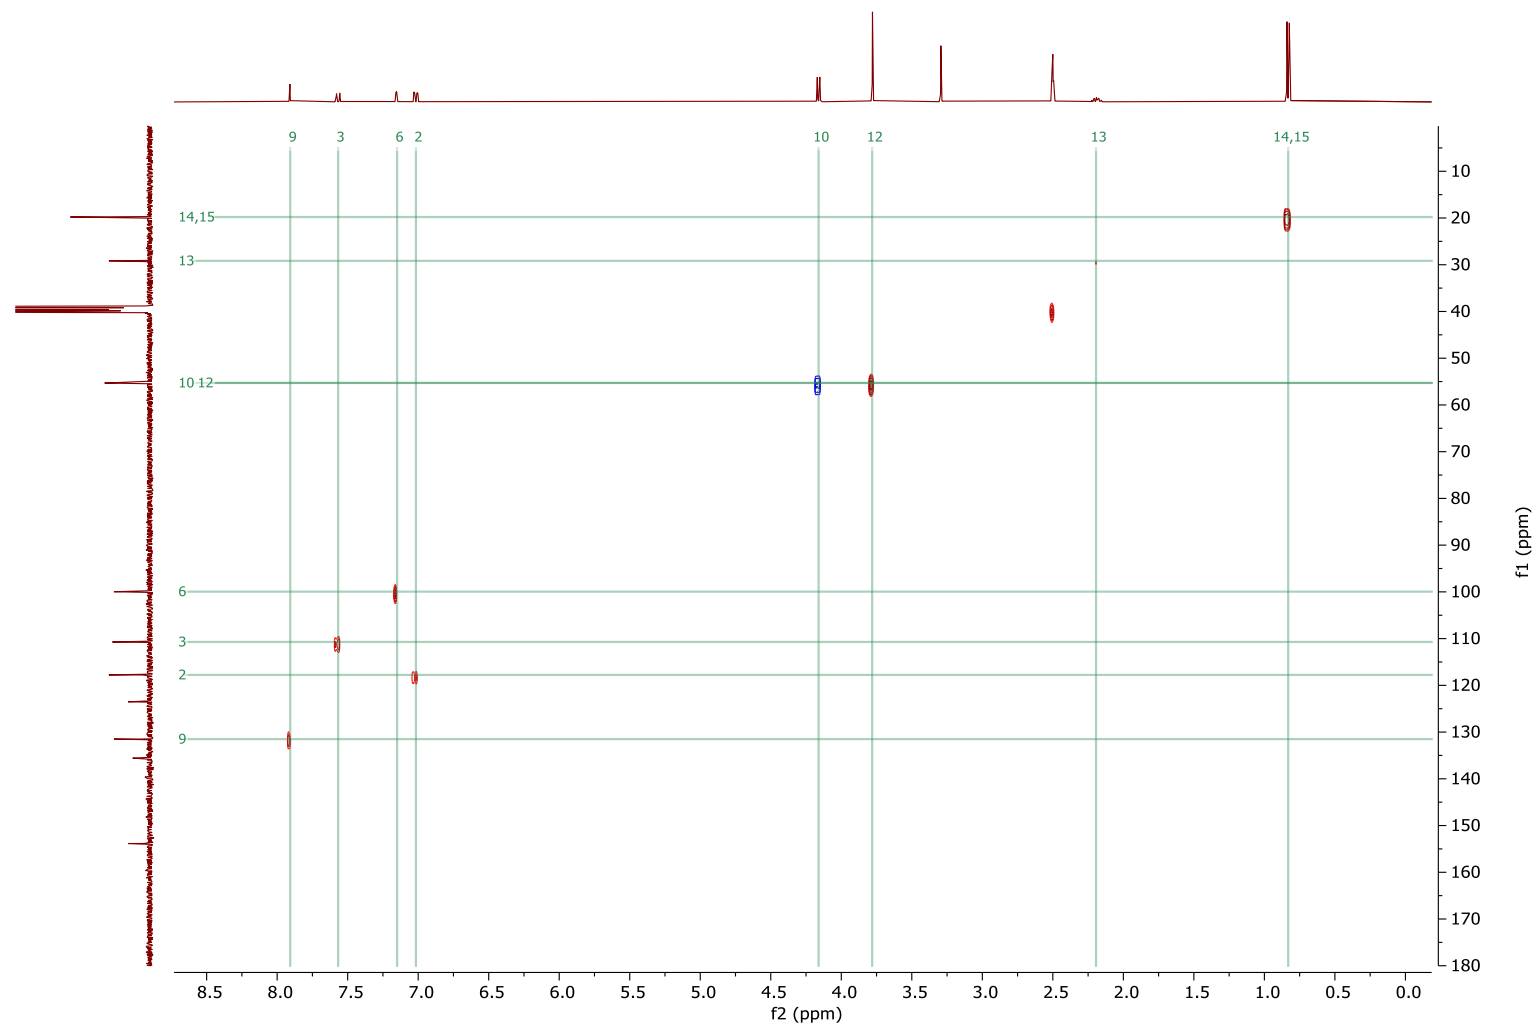

$^1\text{H}$ - $^{13}\text{C}$  HMBC (DMSO- $d_6$ )

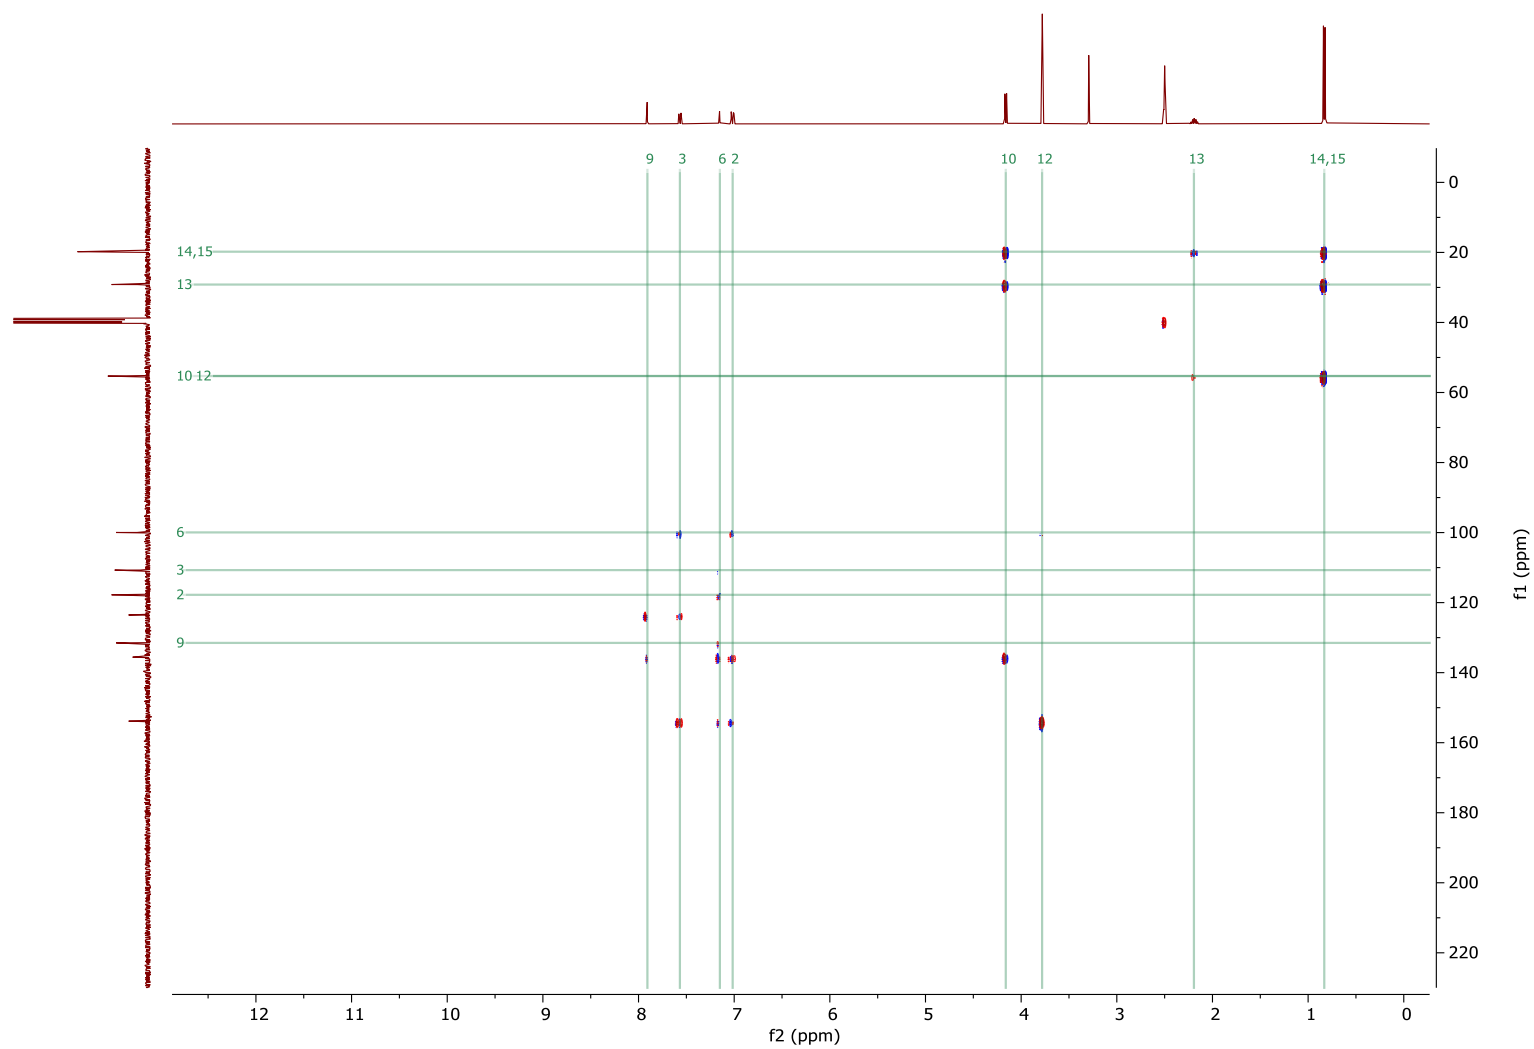

$^1\text{H}$ - $^1\text{H}$  NOESY (400 MHz, DMSO- $d_6$ )

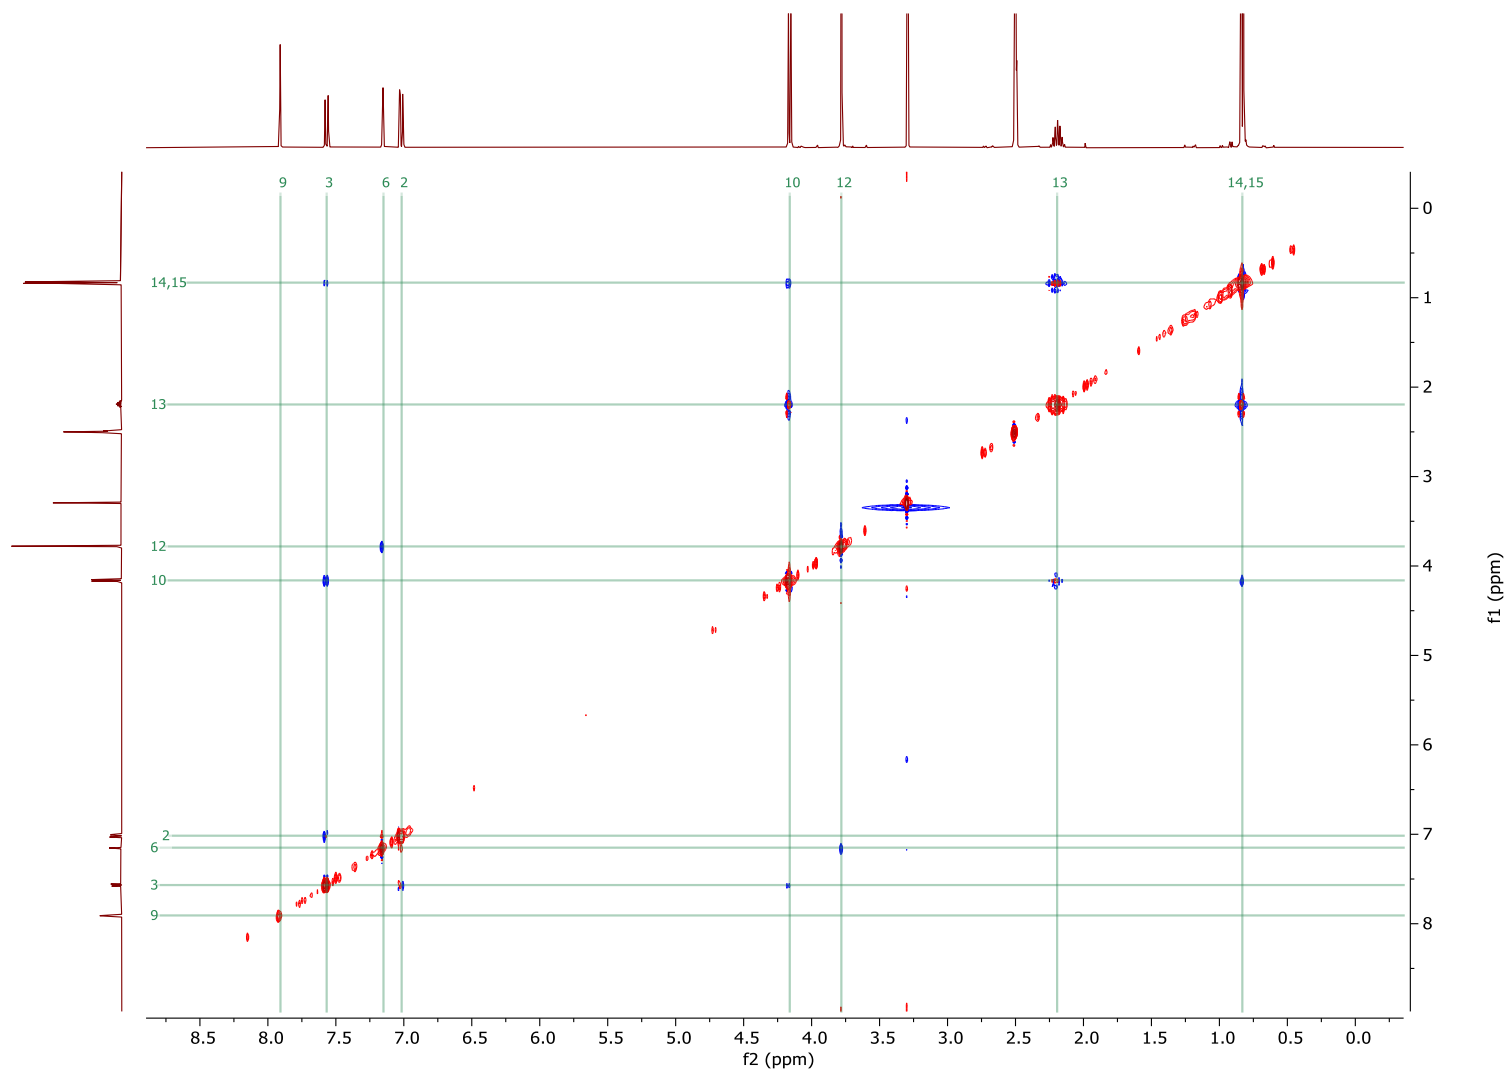

# 1-isobutyl-3-methyl-1*H*-indazole (2I)

<sup>1</sup>H NMR (400 MHz, DMSO-*d*<sub>6</sub>)

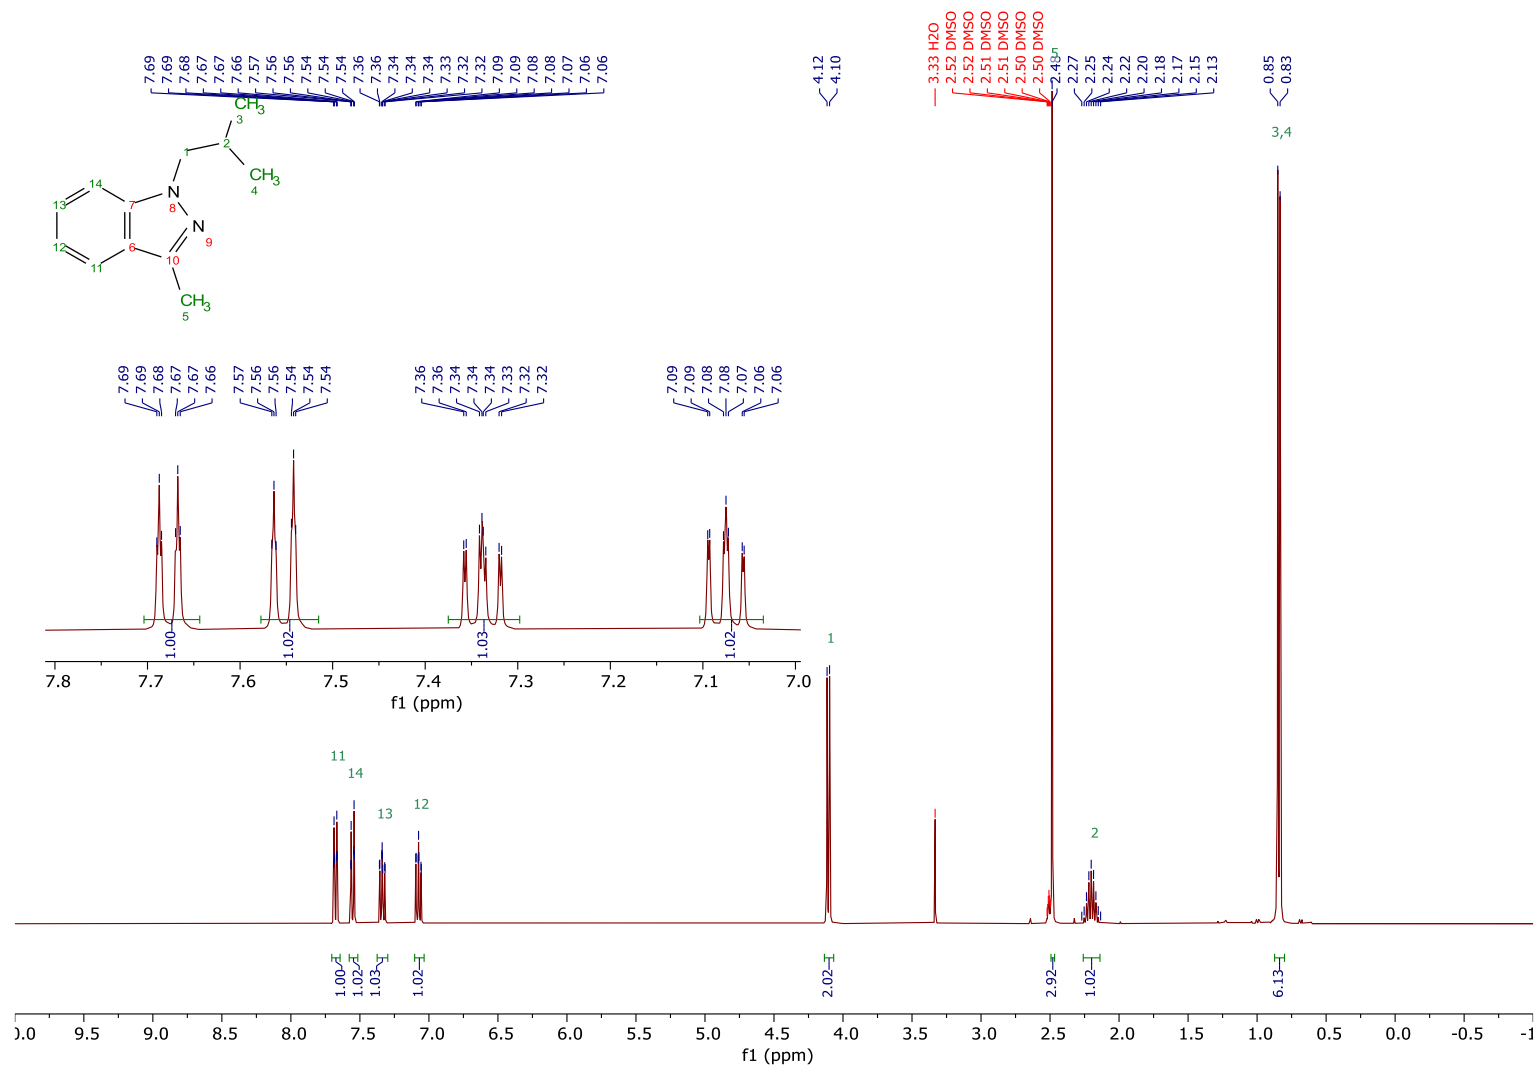

**$^{13}\text{C}$  NMR (101 MHz, DMSO- $d_6$ )**

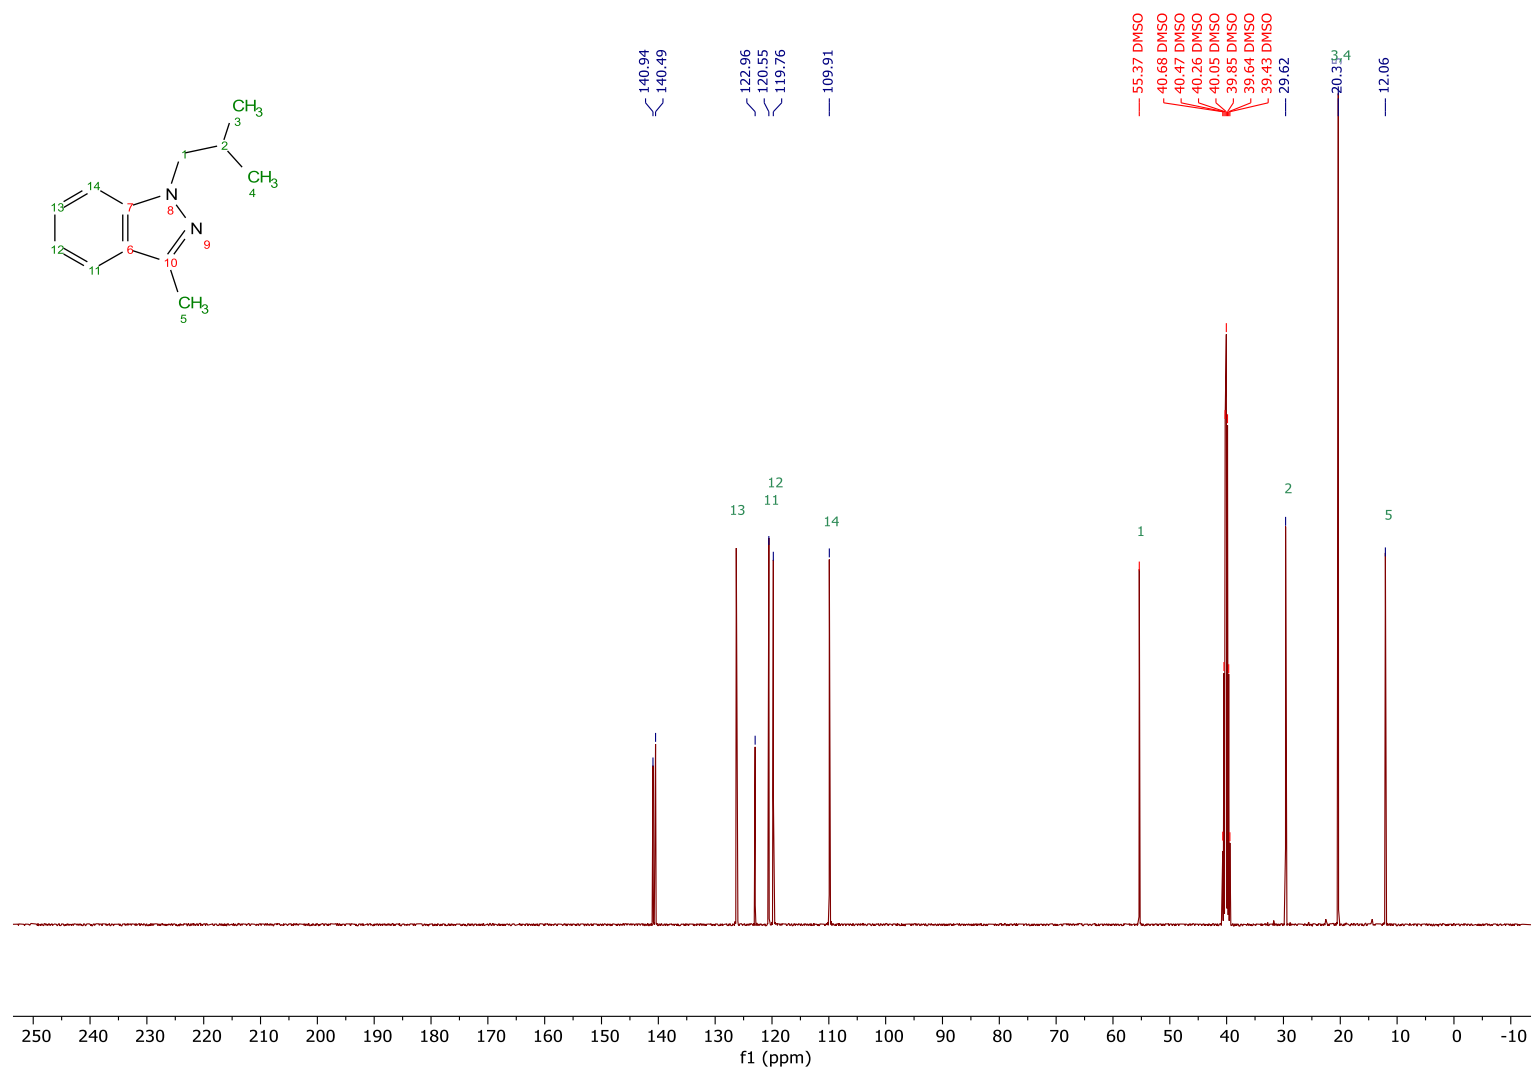

$^1\text{H}$ - $^1\text{H}$  COSY (400 MHz, DMSO- $d_6$ )

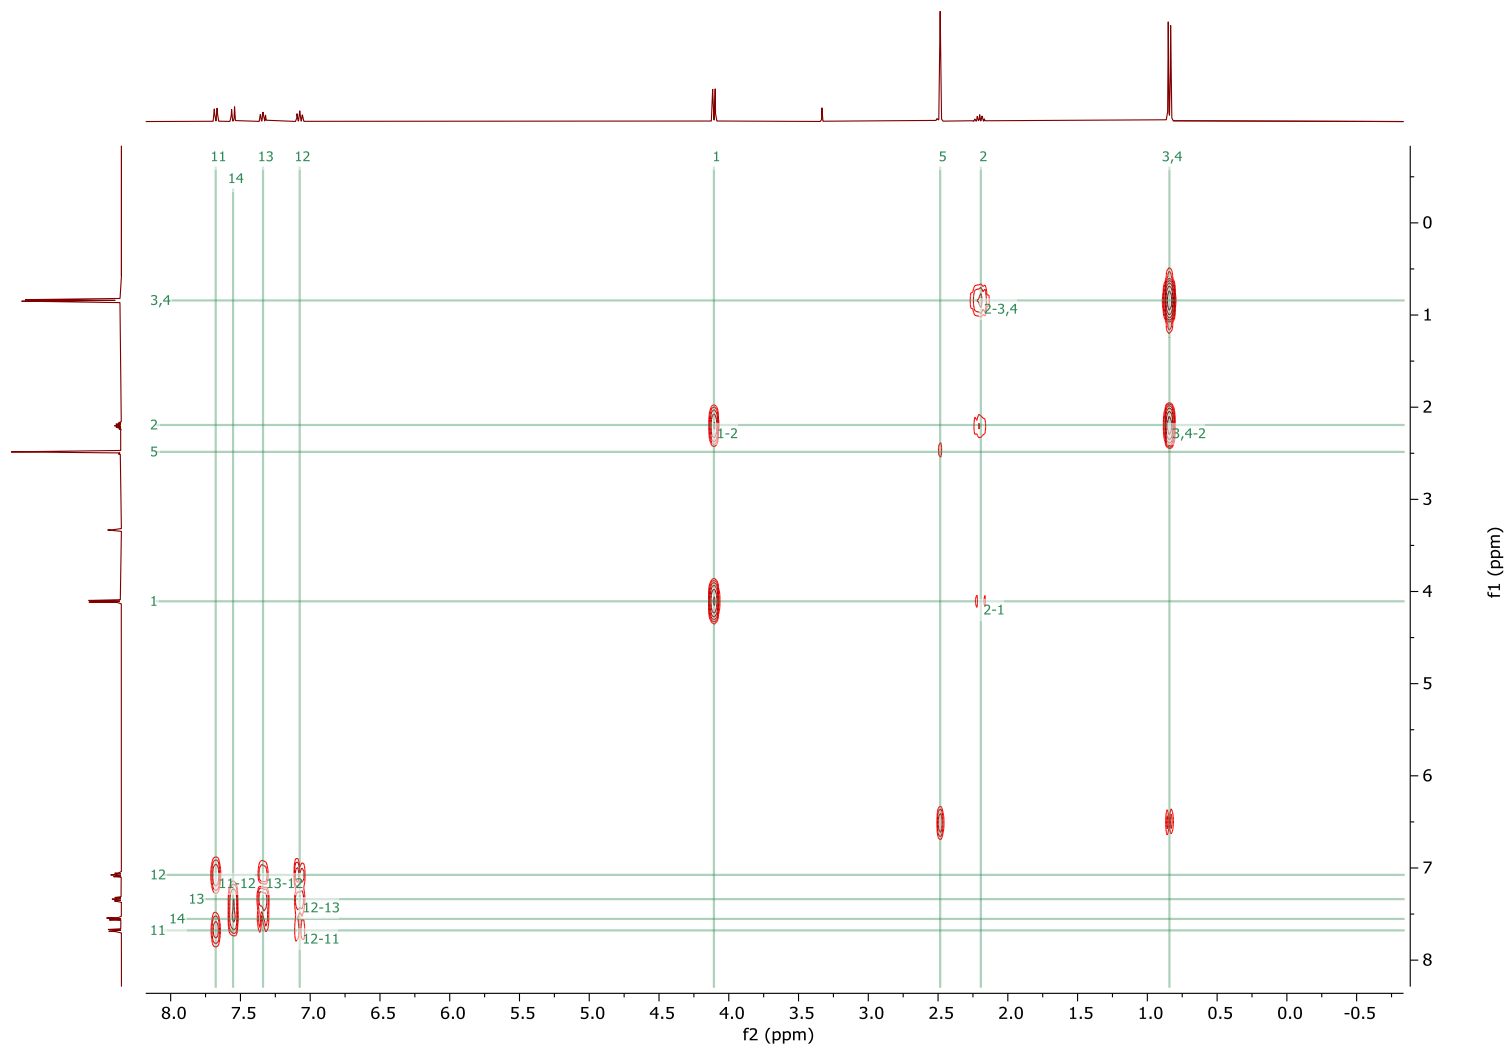

<sup>1</sup>H-<sup>13</sup>C HSQC (DMSO-*d*<sub>6</sub>)

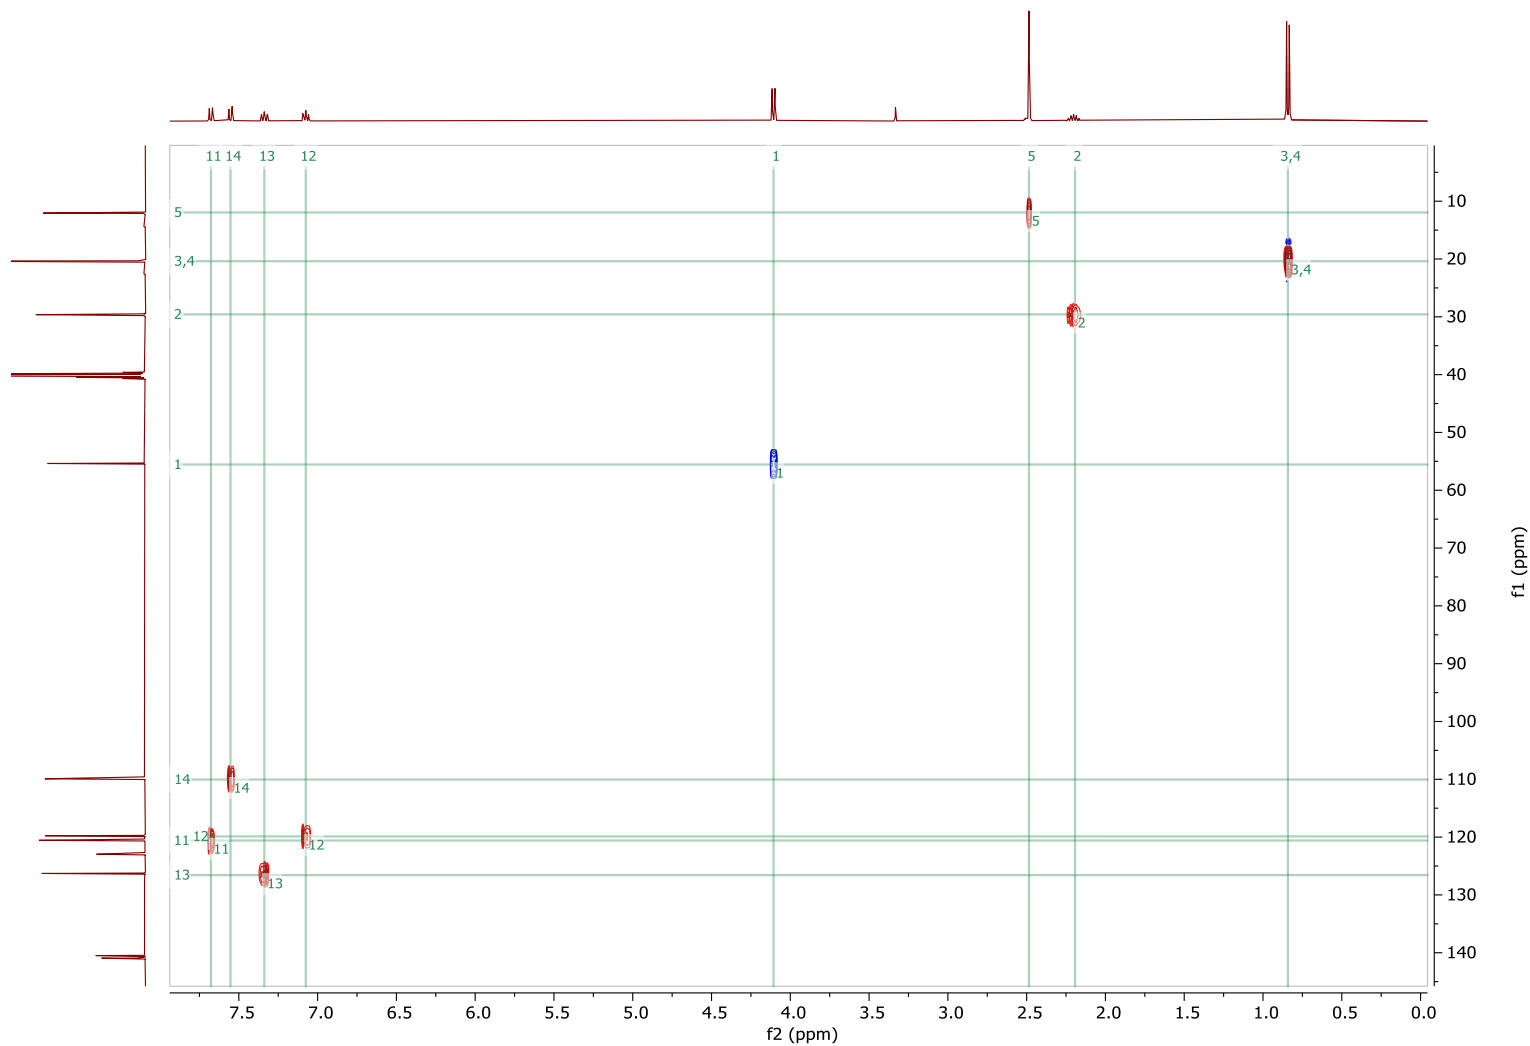

$^1\text{H}$ - $^{13}\text{C}$  HMBC (DMSO- $d_6$ )

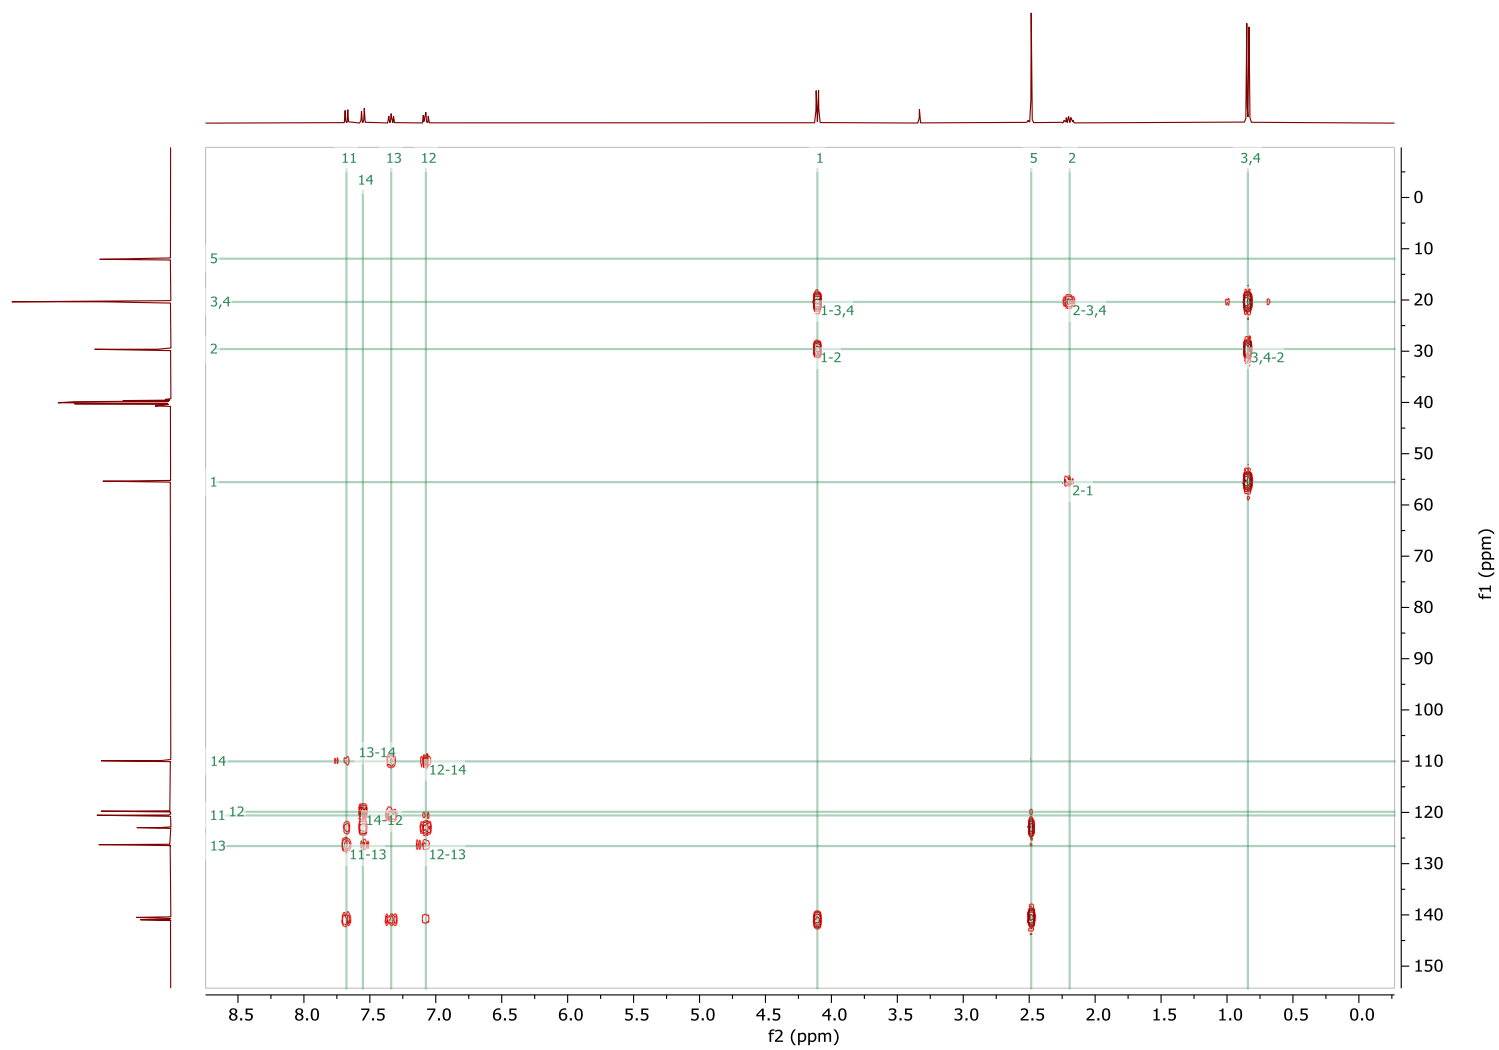

$^1\text{H}$ - $^1\text{H}$  NOESY (400 MHz, DMSO- $d_6$ )

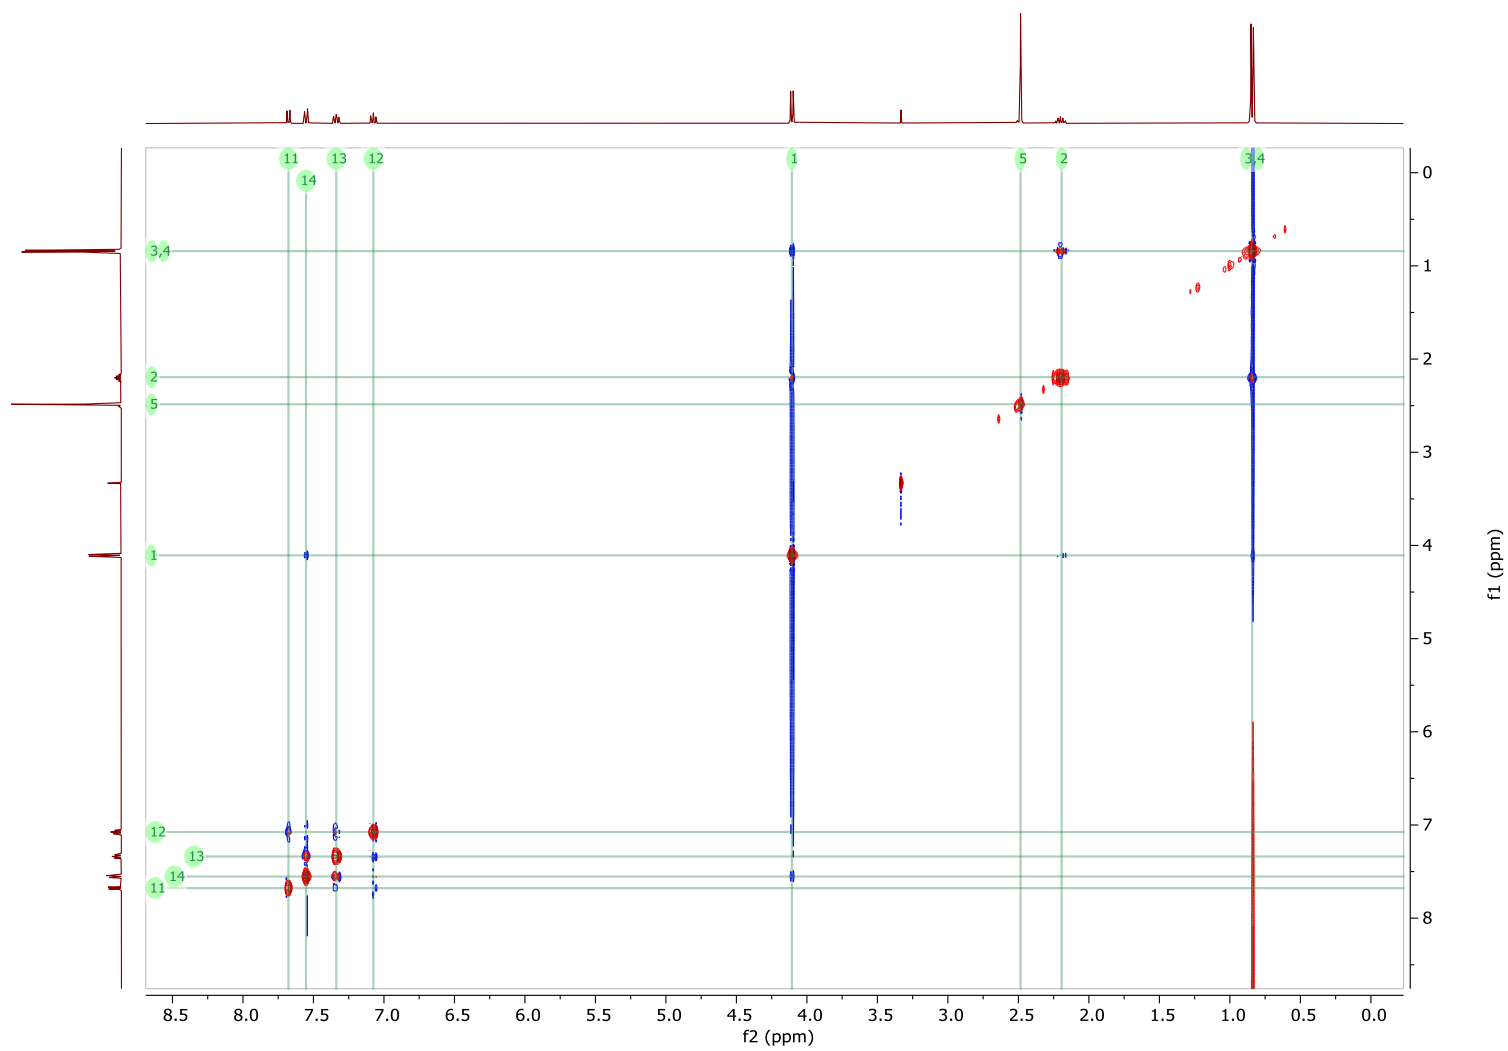

**Methyl 5-bromo-1(cyclohexylmethyl)-1H-indazole-6-carboxylate (2m)**

<sup>1</sup>H NMR (400 MHz, CDCl<sub>3</sub>)

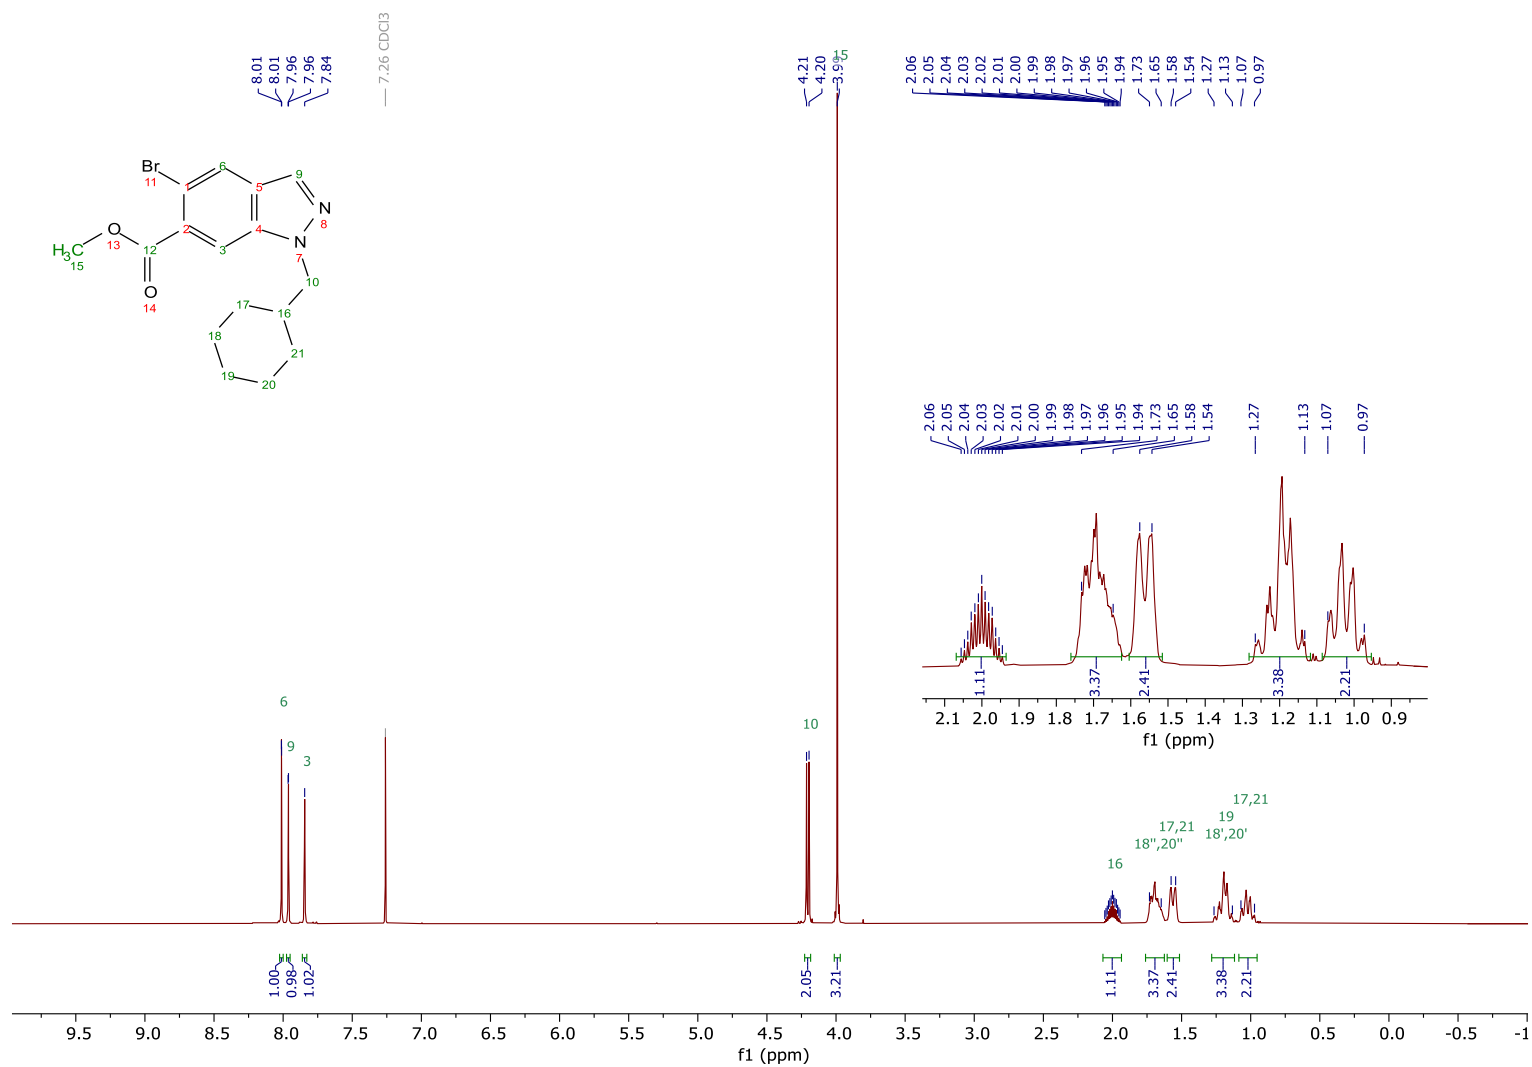

**$^{13}\text{C}$  NMR (101 MHz,  $\text{CDCl}_3$ )**

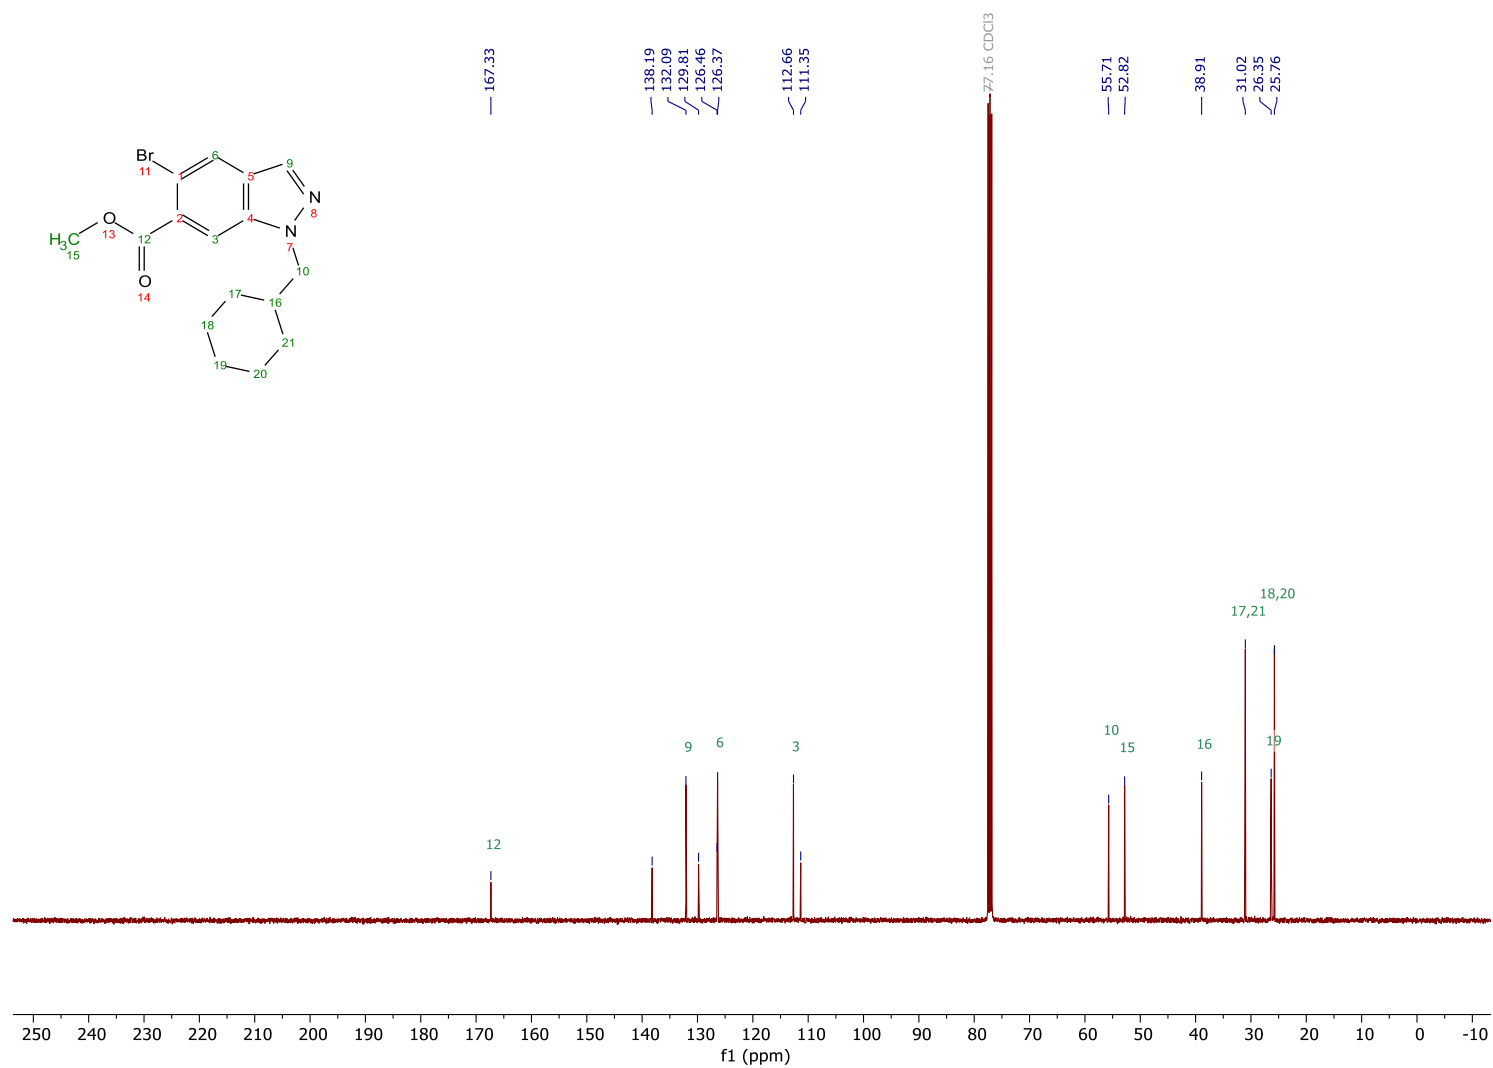

$^1\text{H}$ - $^1\text{H}$  COSY (400 MHz,  $\text{CDCl}_3$ )

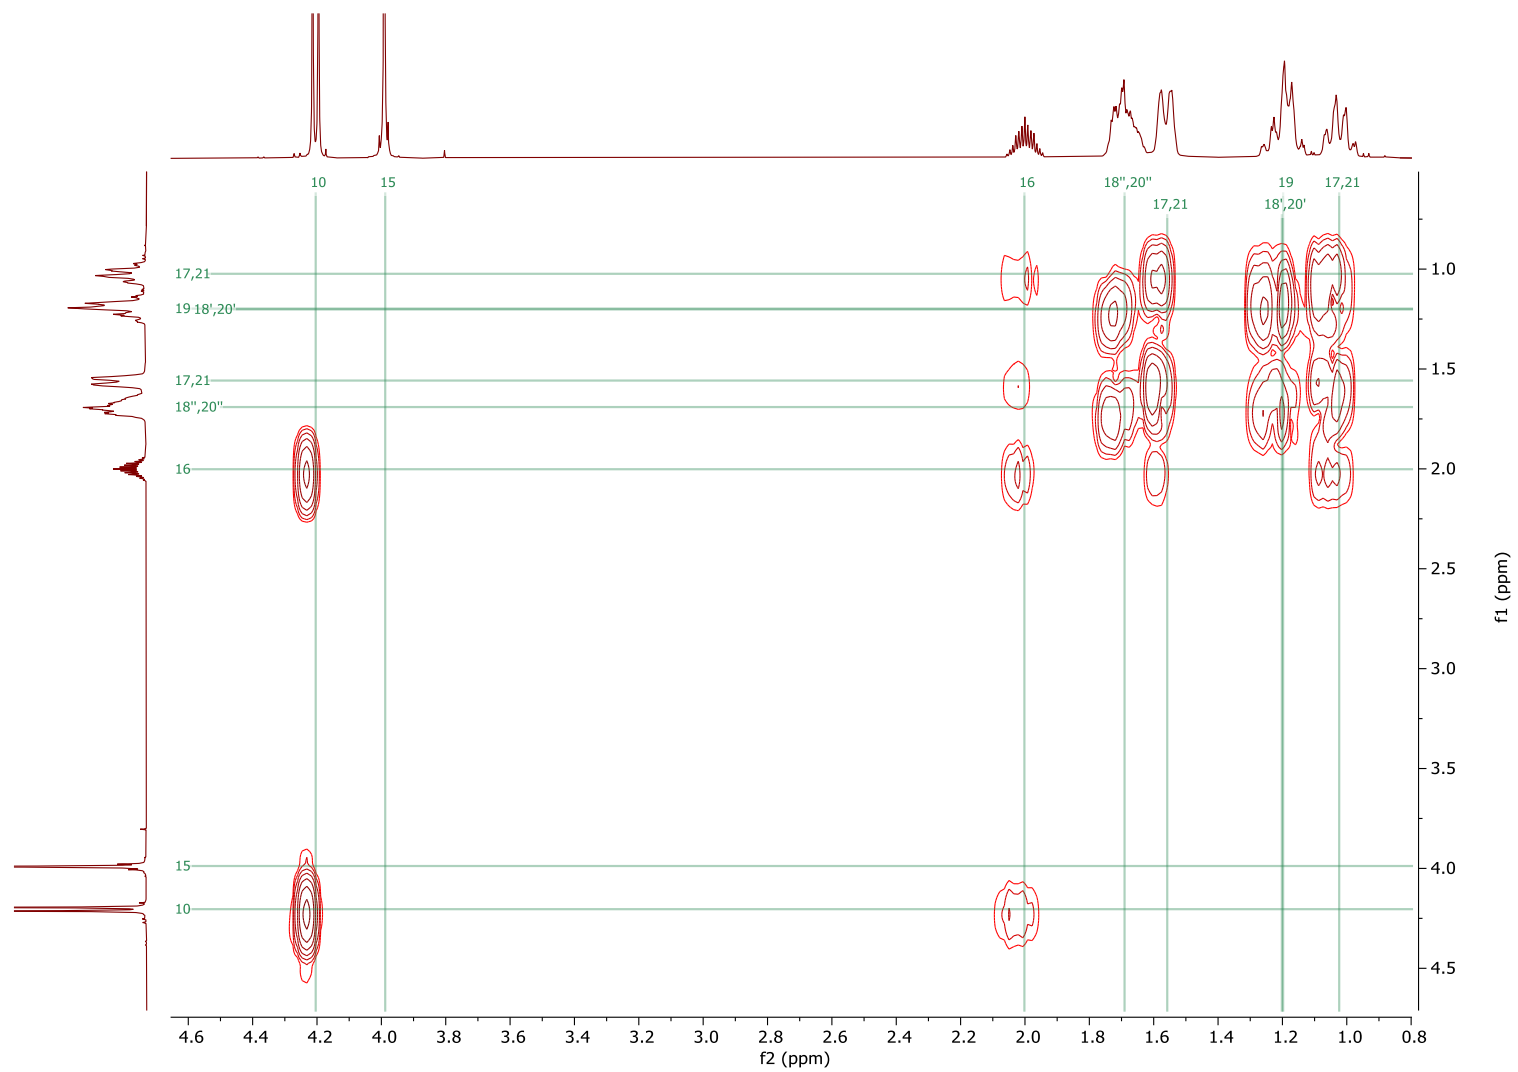

$^1\text{H}$ - $^{13}\text{C}$  HSQC ( $\text{CDCl}_3$ )

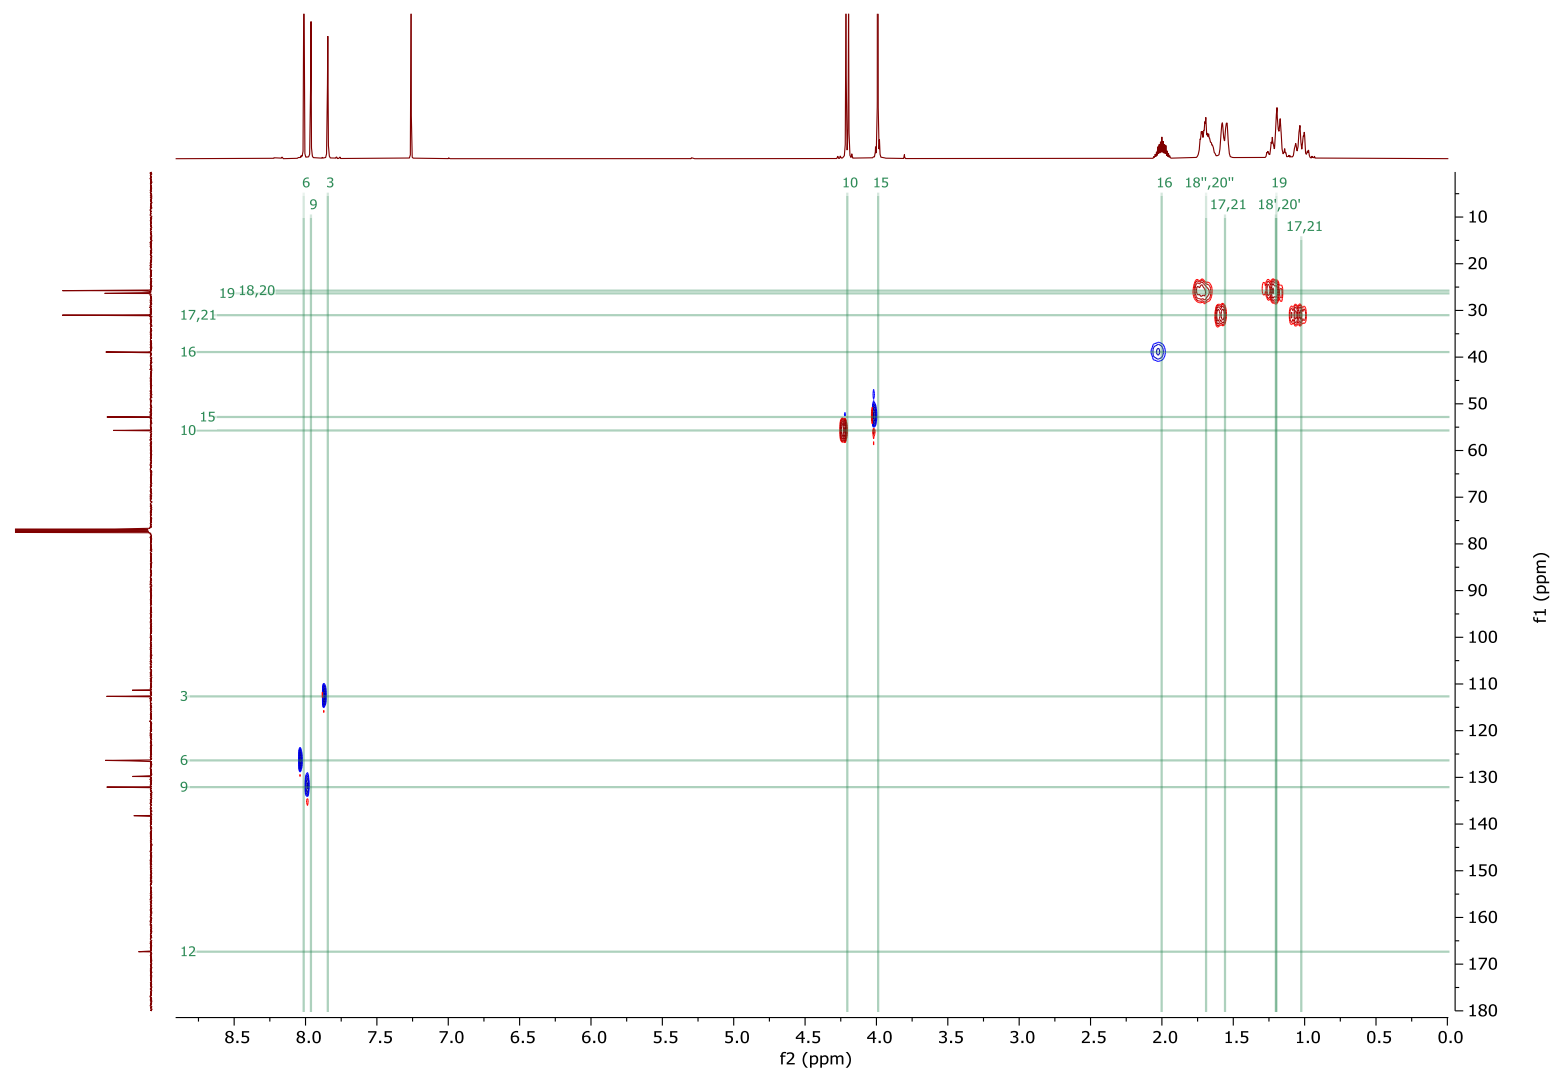

$^1\text{H}$ - $^{13}\text{C}$  HMBC ( $\text{CDCl}_3$ )

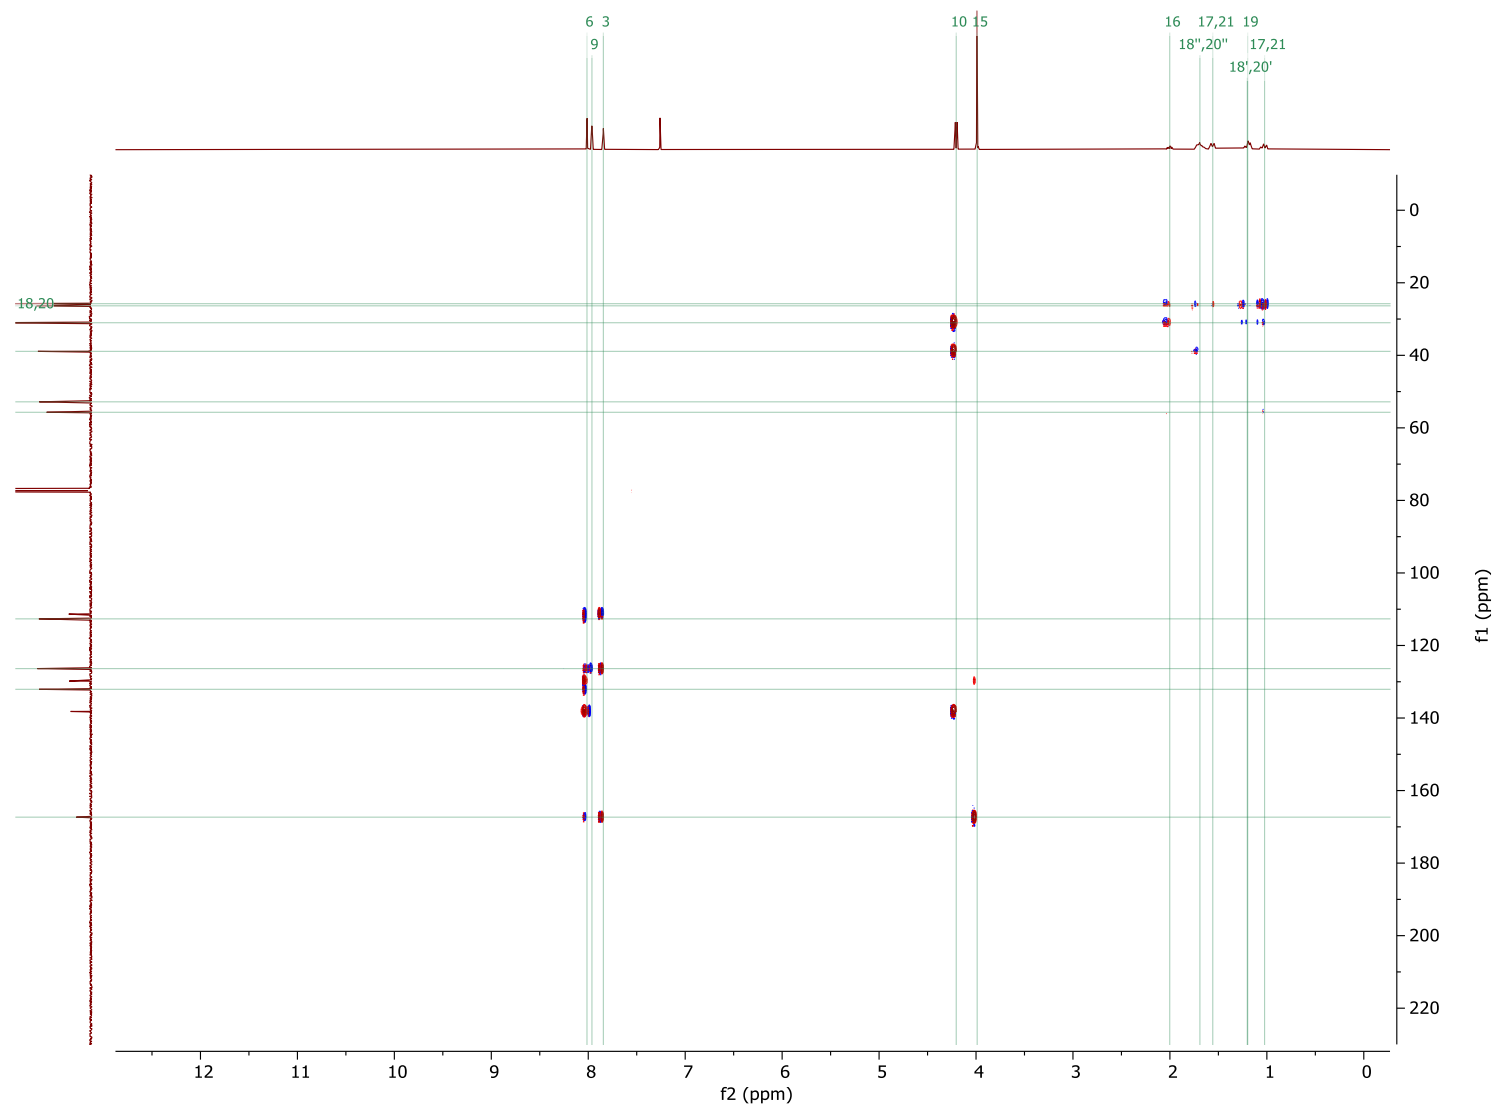

$^1\text{H}$ - $^1\text{H}$  NOESY (400 MHz,  $\text{CDCl}_3$ )

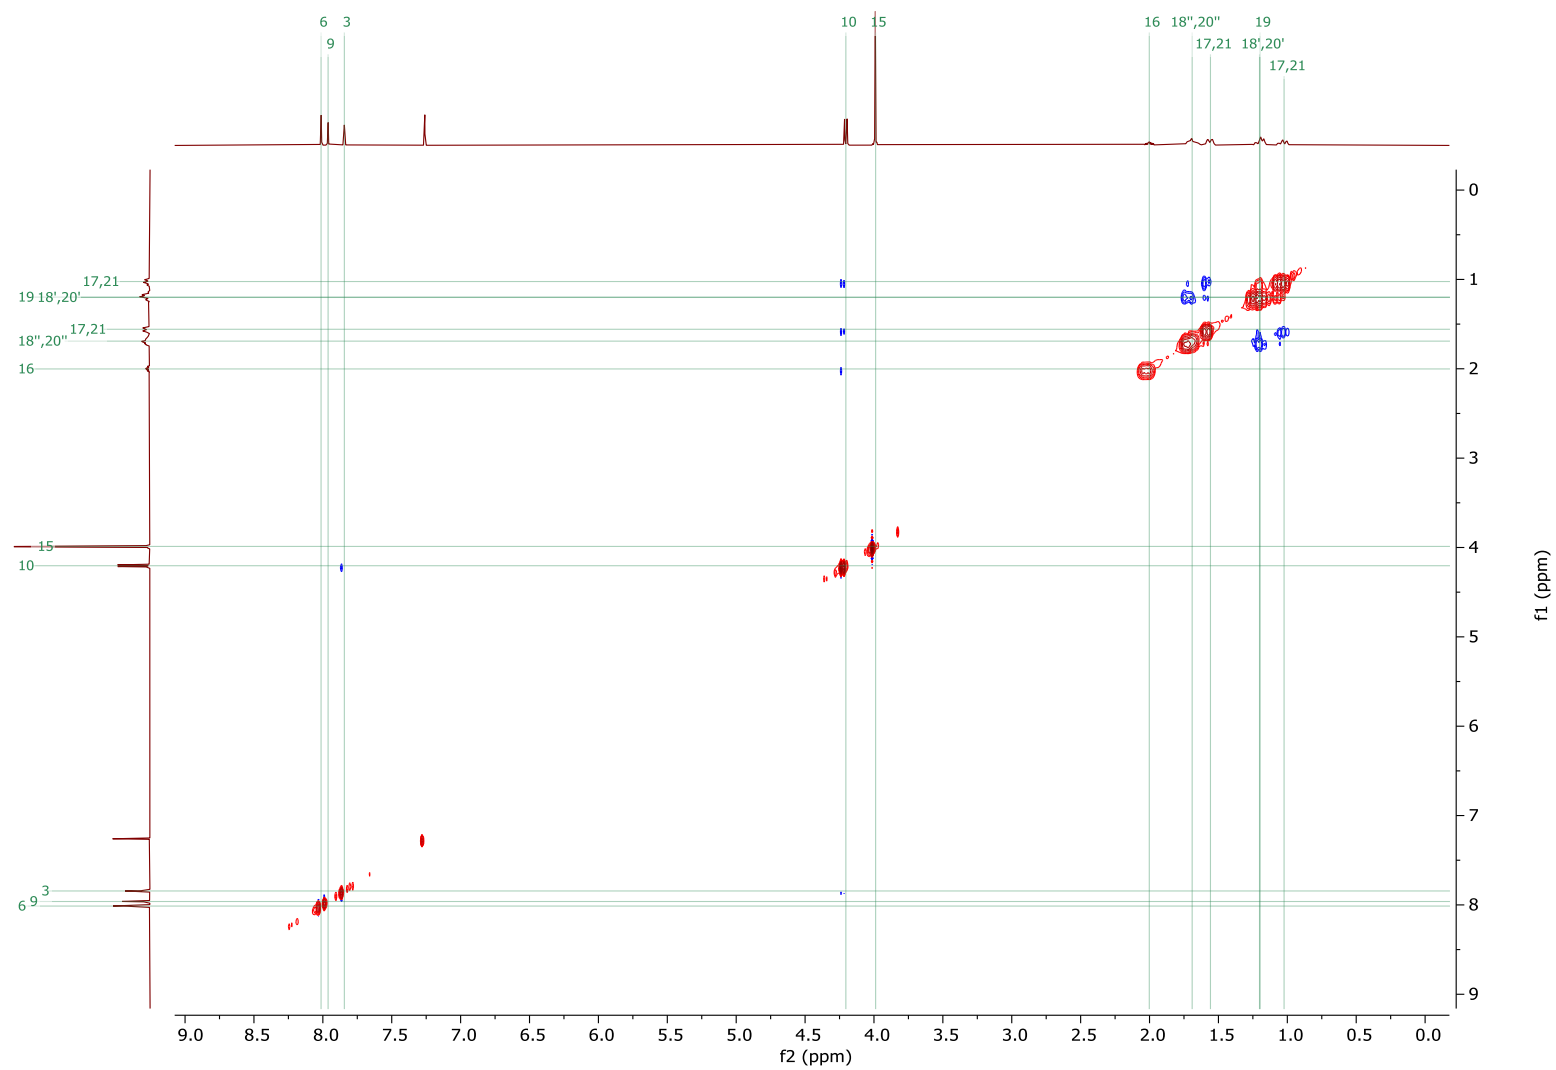

# 1-(cyclohexylmethyl)-1H-indazole (2n)

<sup>1</sup>H NMR (400 MHz, DMSO-d<sub>6</sub>)

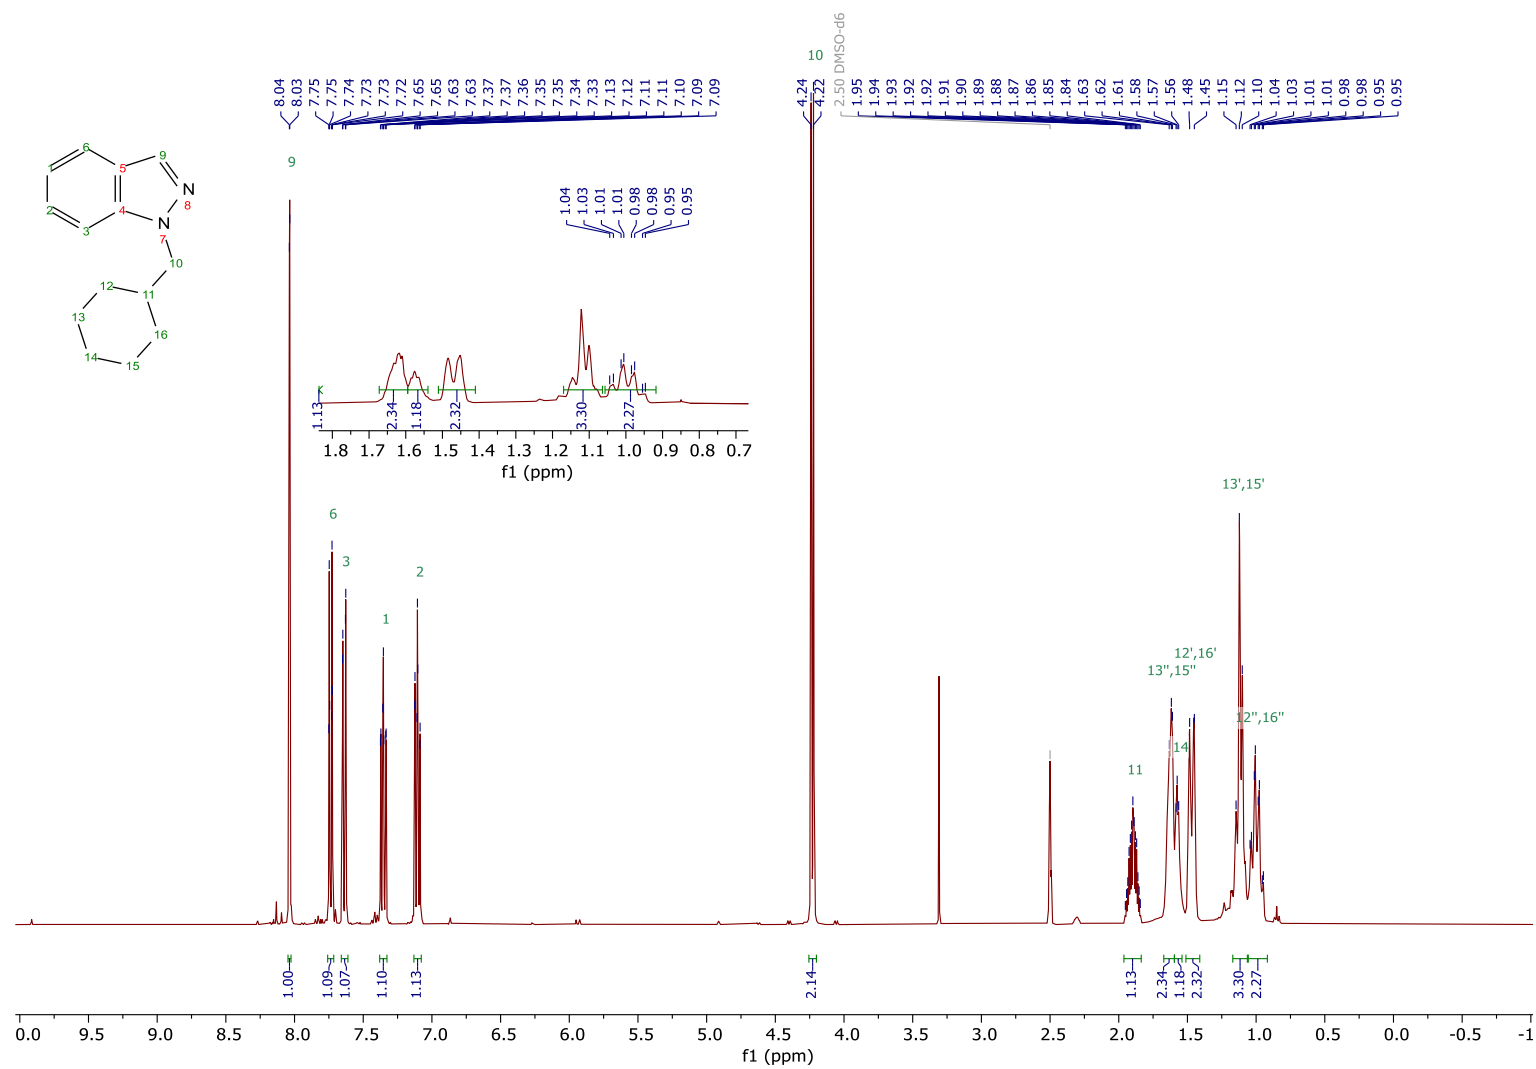

**$^{13}\text{C}$  NMR (101 MHz, DMSO- $d_6$ )**

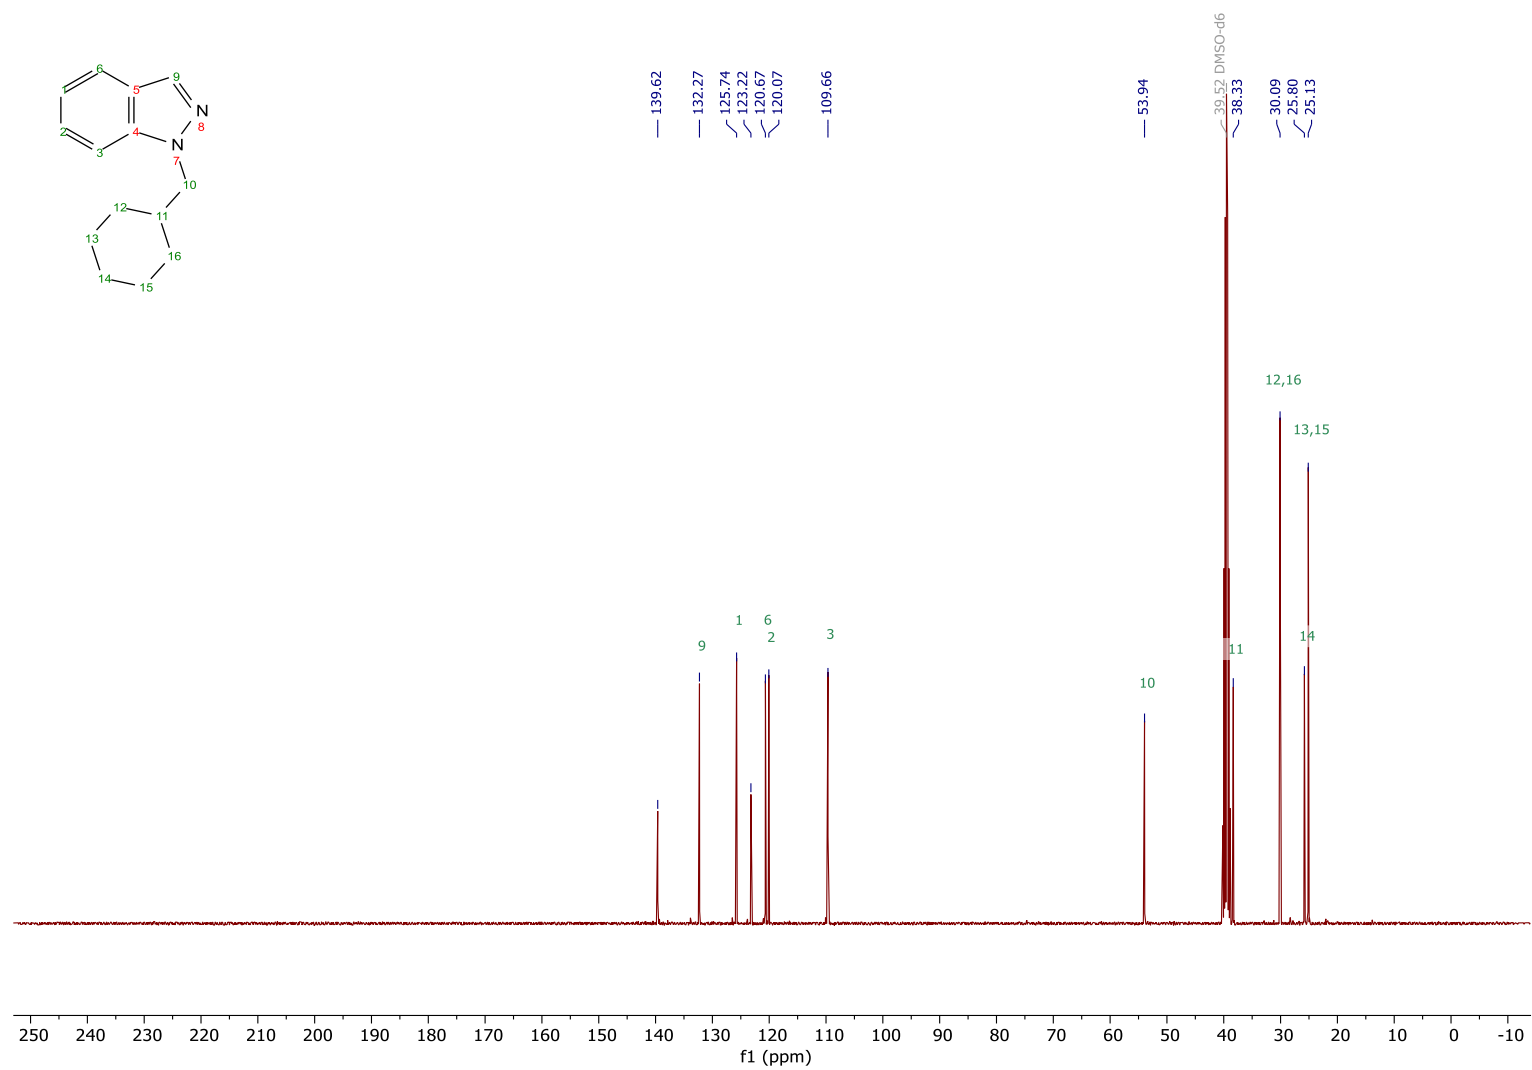

$^1\text{H}$ - $^1\text{H}$  COSY (400 MHz, DMSO- $d_6$ )

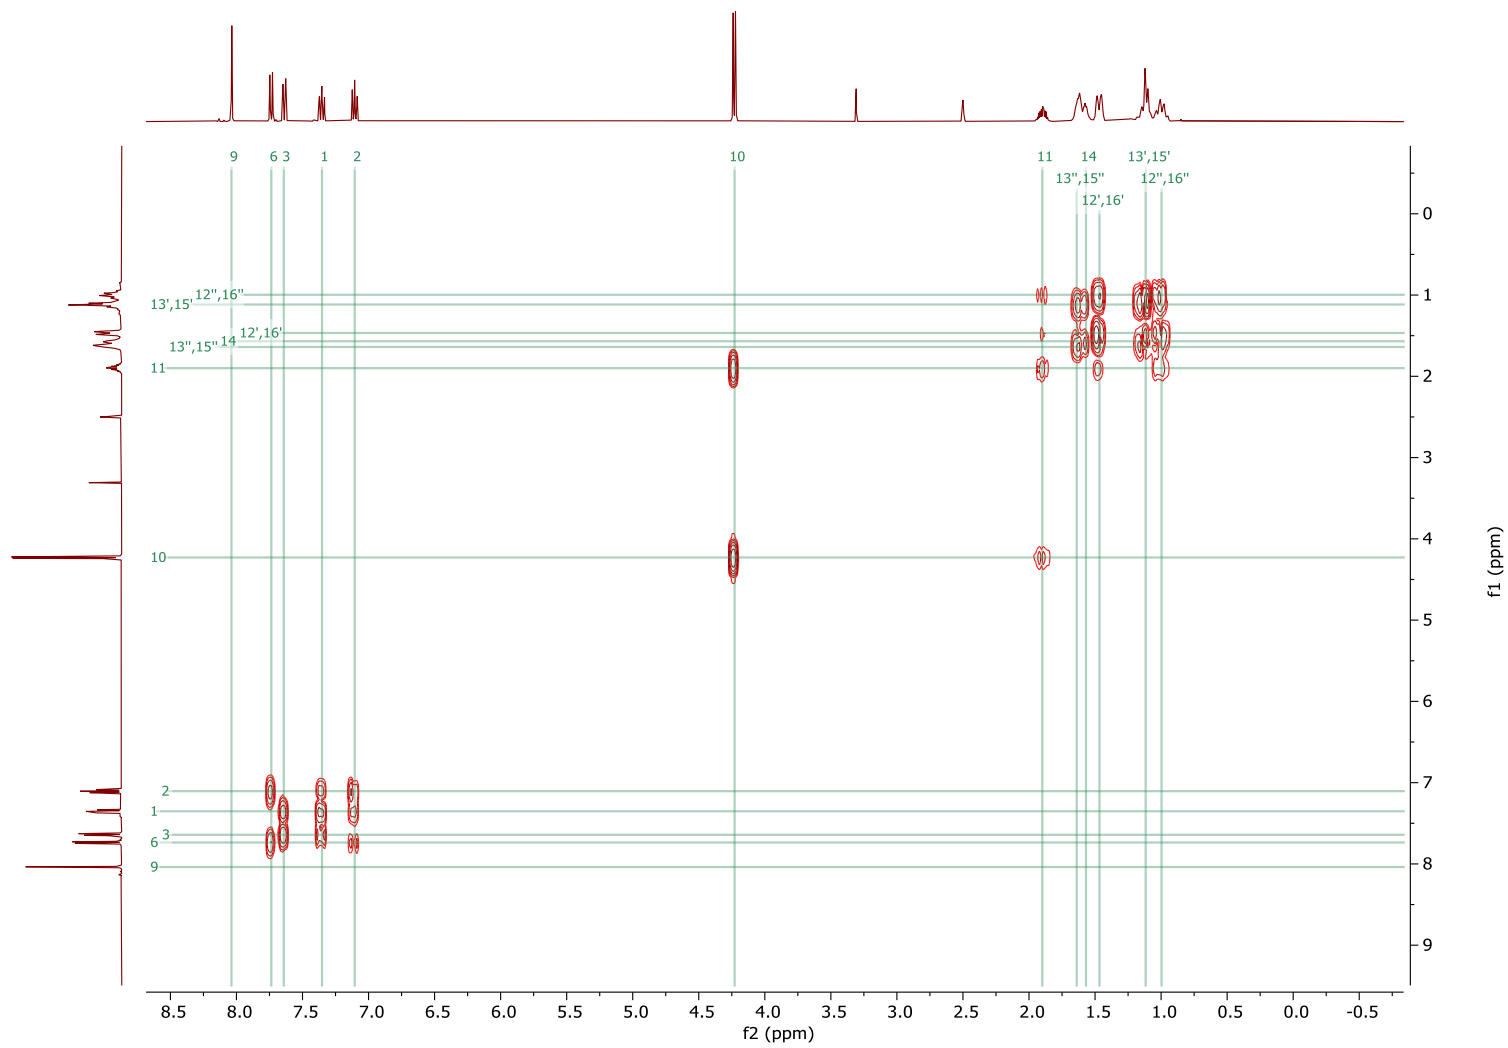

$^1\text{H}$ - $^{13}\text{C}$  HSQC (DMSO- $d_6$ )

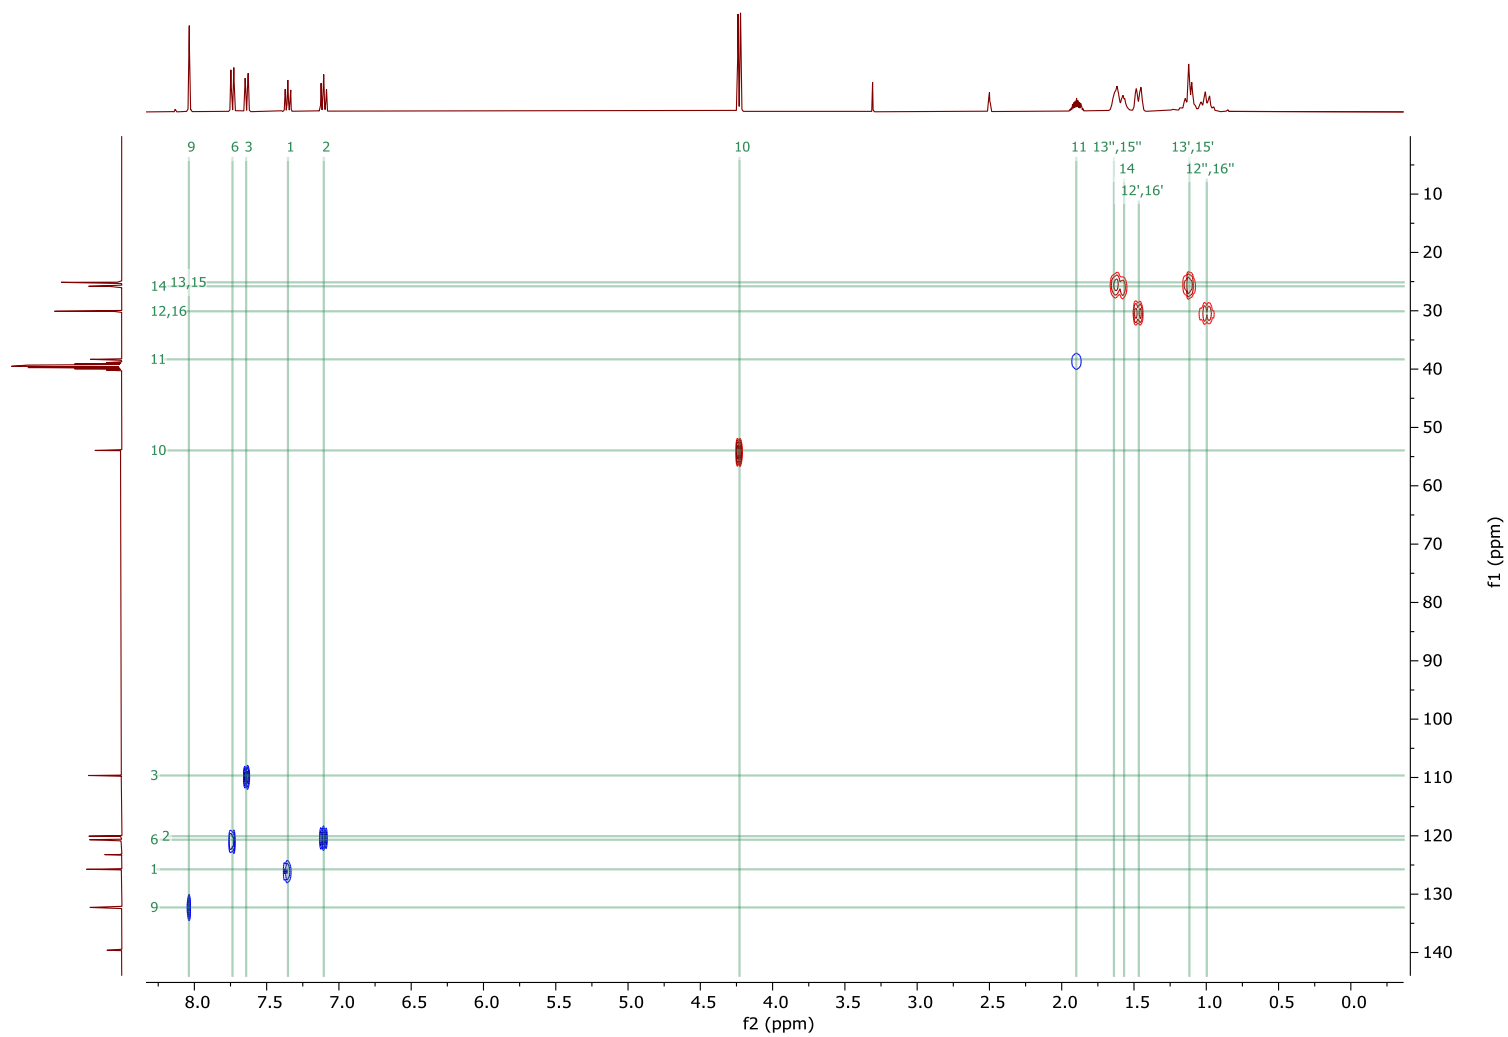

$^1\text{H}$ - $^{13}\text{C}$  HMBC (DMSO- $d_6$ )

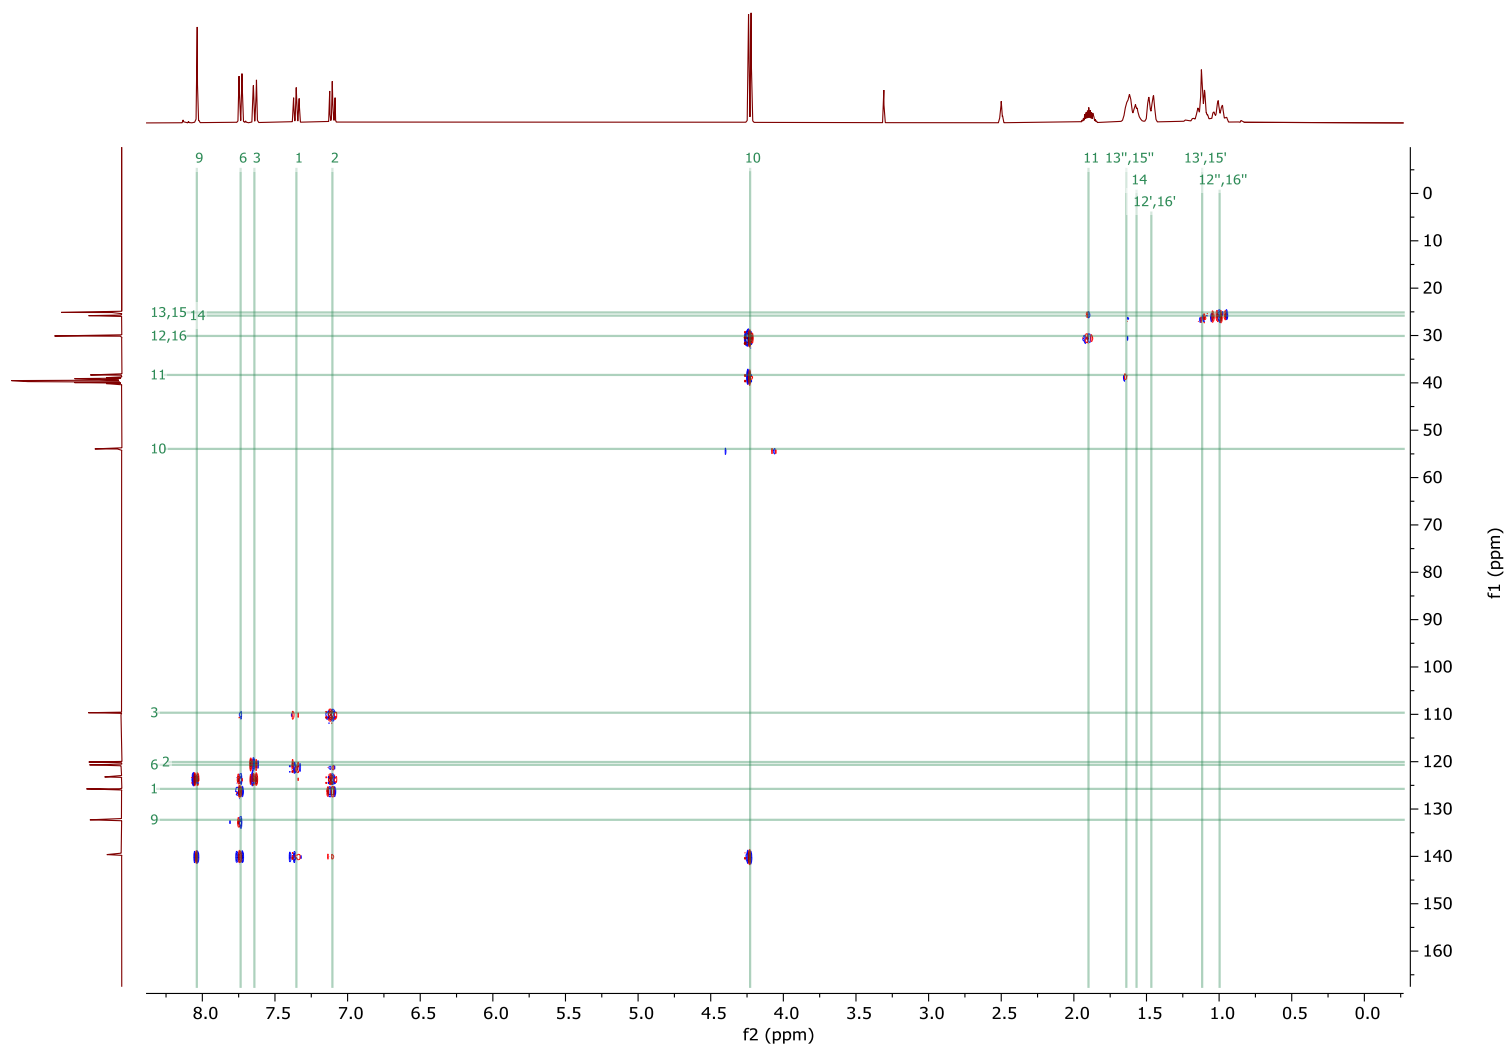

$^1\text{H}$ - $^1\text{H}$  NOESY (400 MHz, DMSO- $d_6$ )

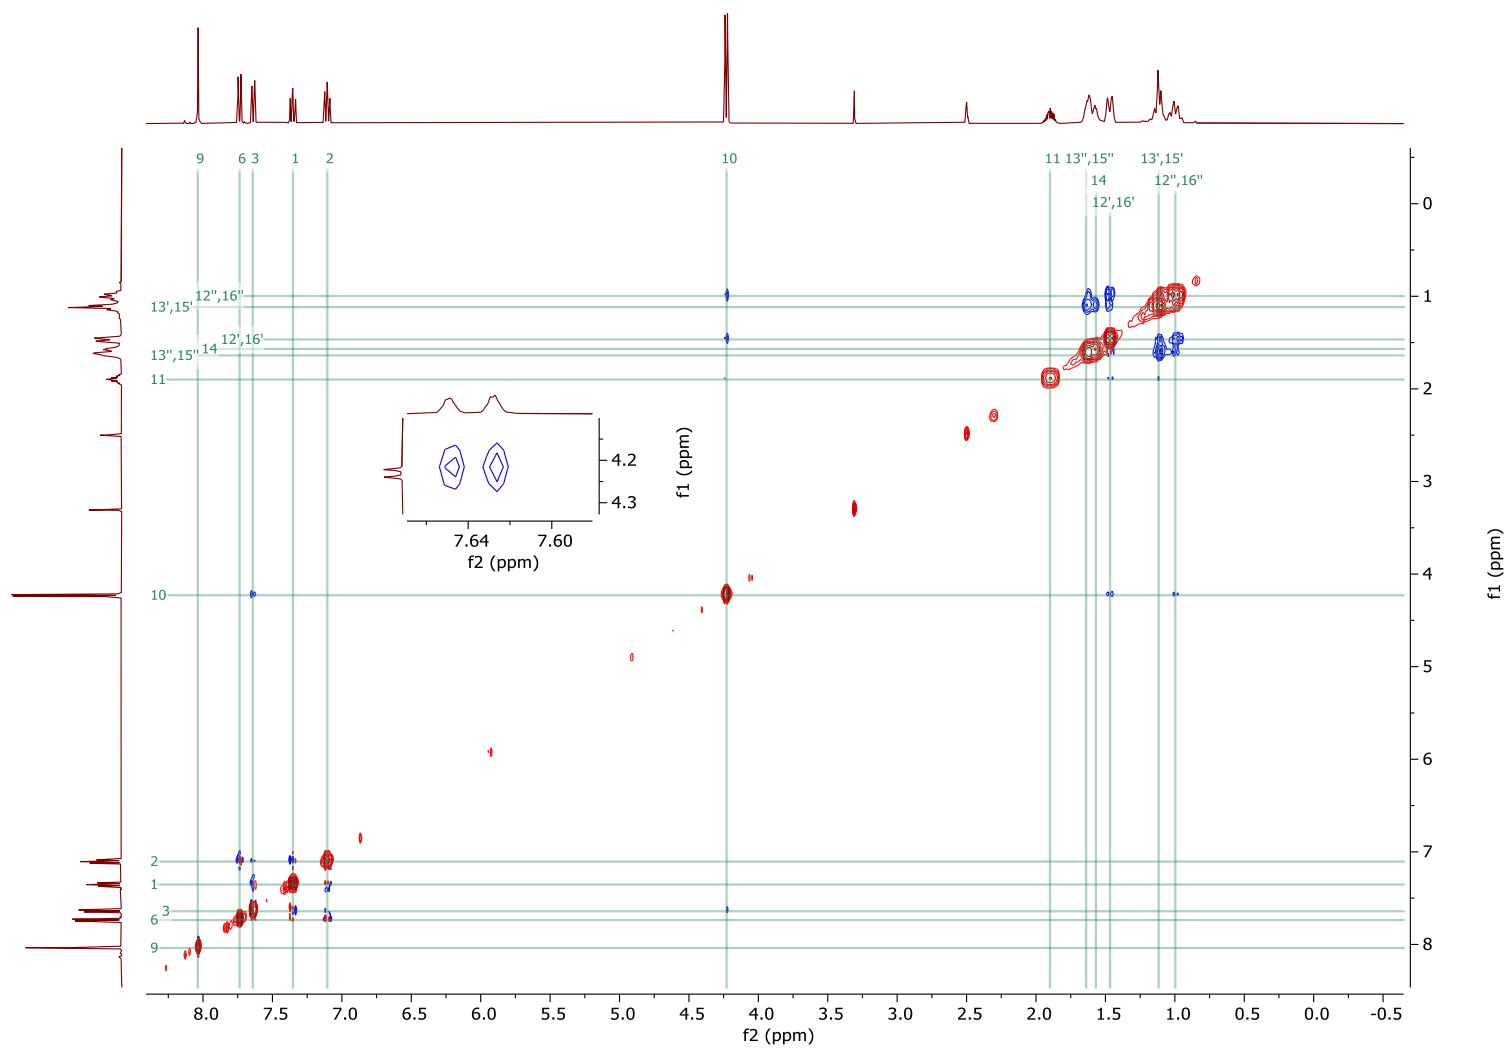

**1-(cyclopentylmethyl)-1*H*-indazole (2o)**

**<sup>1</sup>H NMR (400 MHz, DMSO-*d*<sub>6</sub>)**

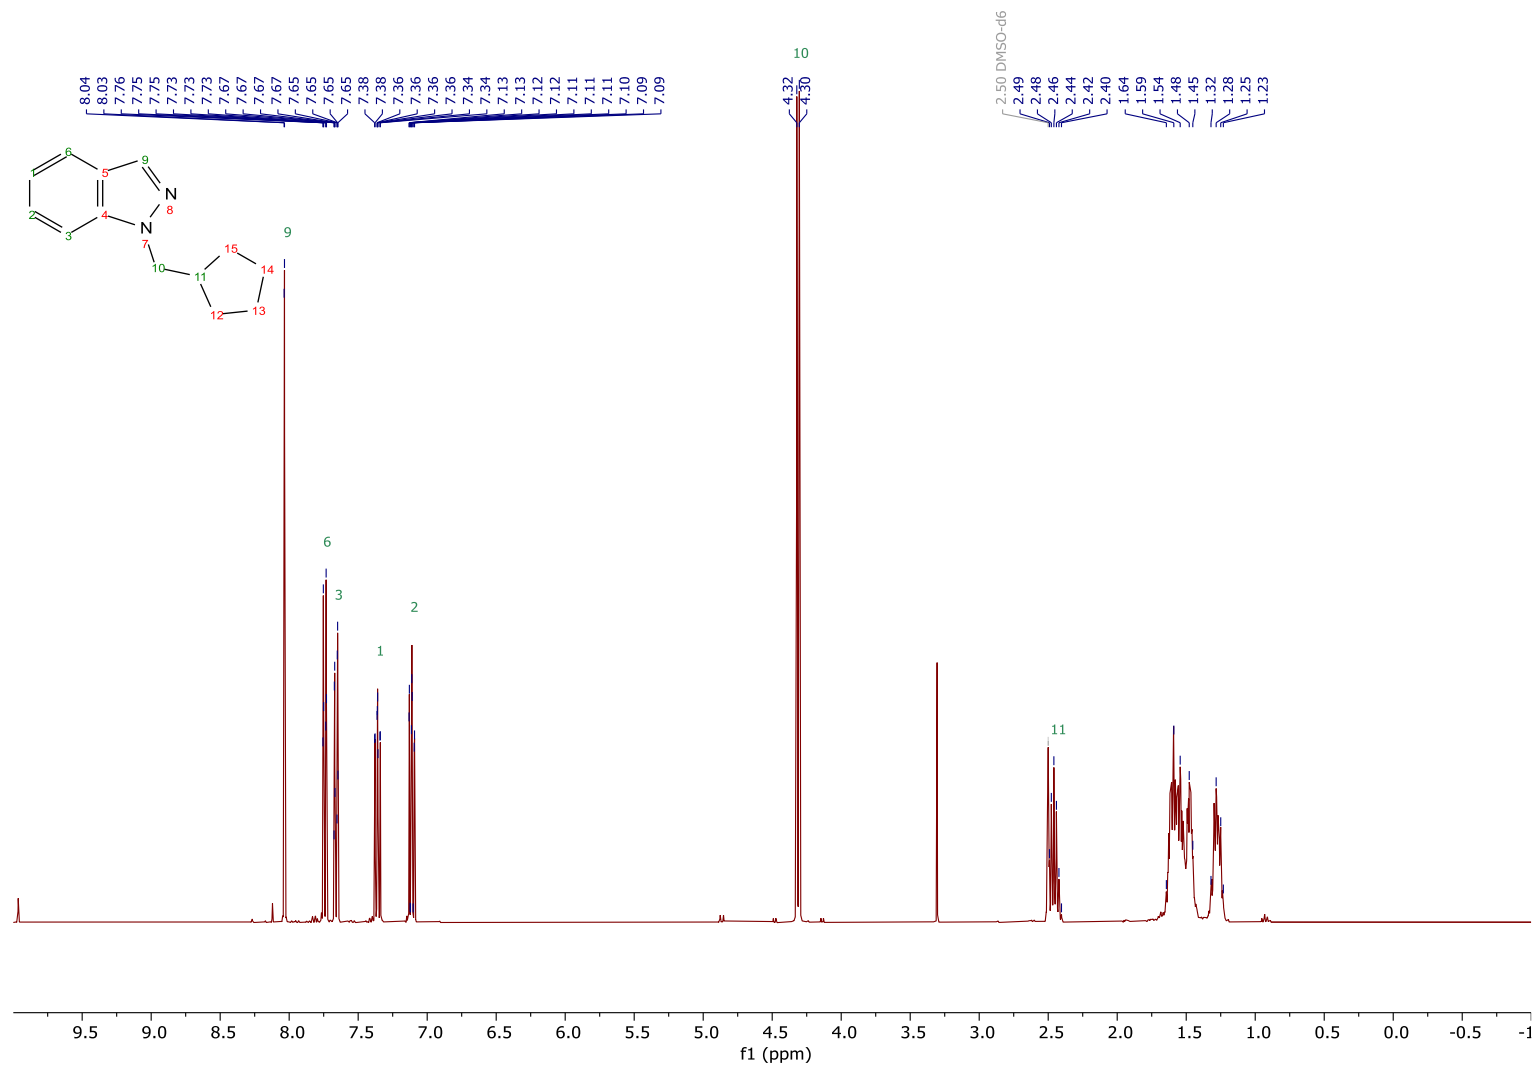

**$^{13}\text{C}$  NMR (101 MHz, DMSO- $d_6$ )**

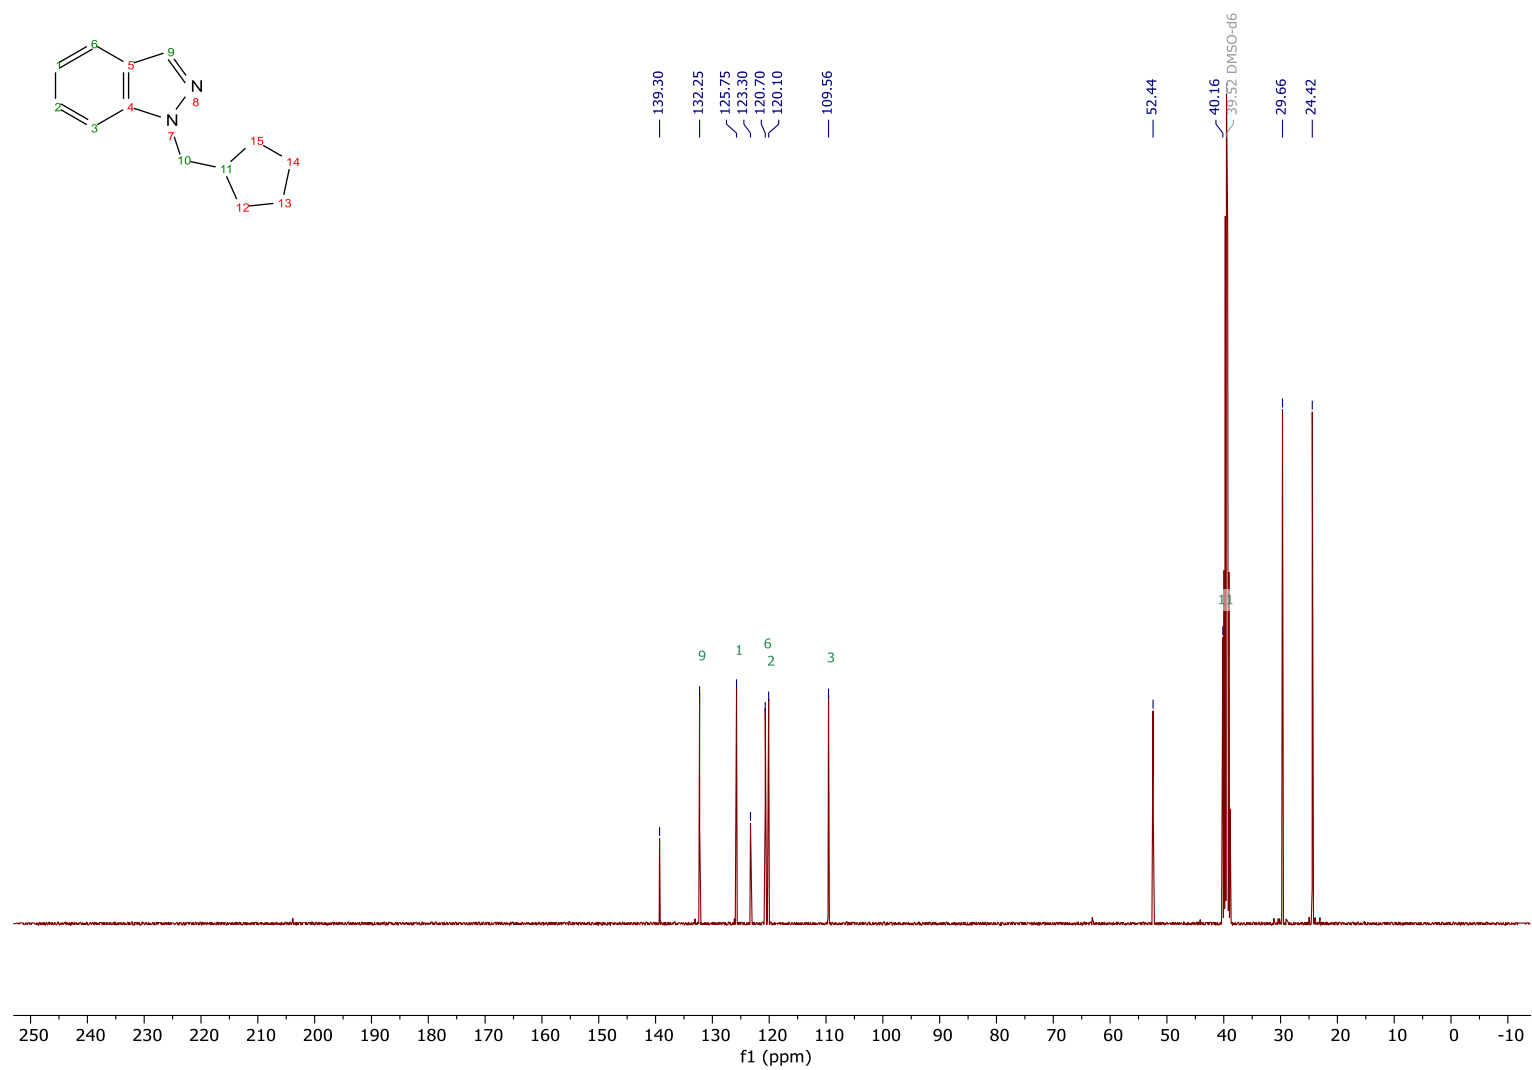

$^1\text{H}$ - $^1\text{H}$  COSY (400 MHz, DMSO- $d_6$ )

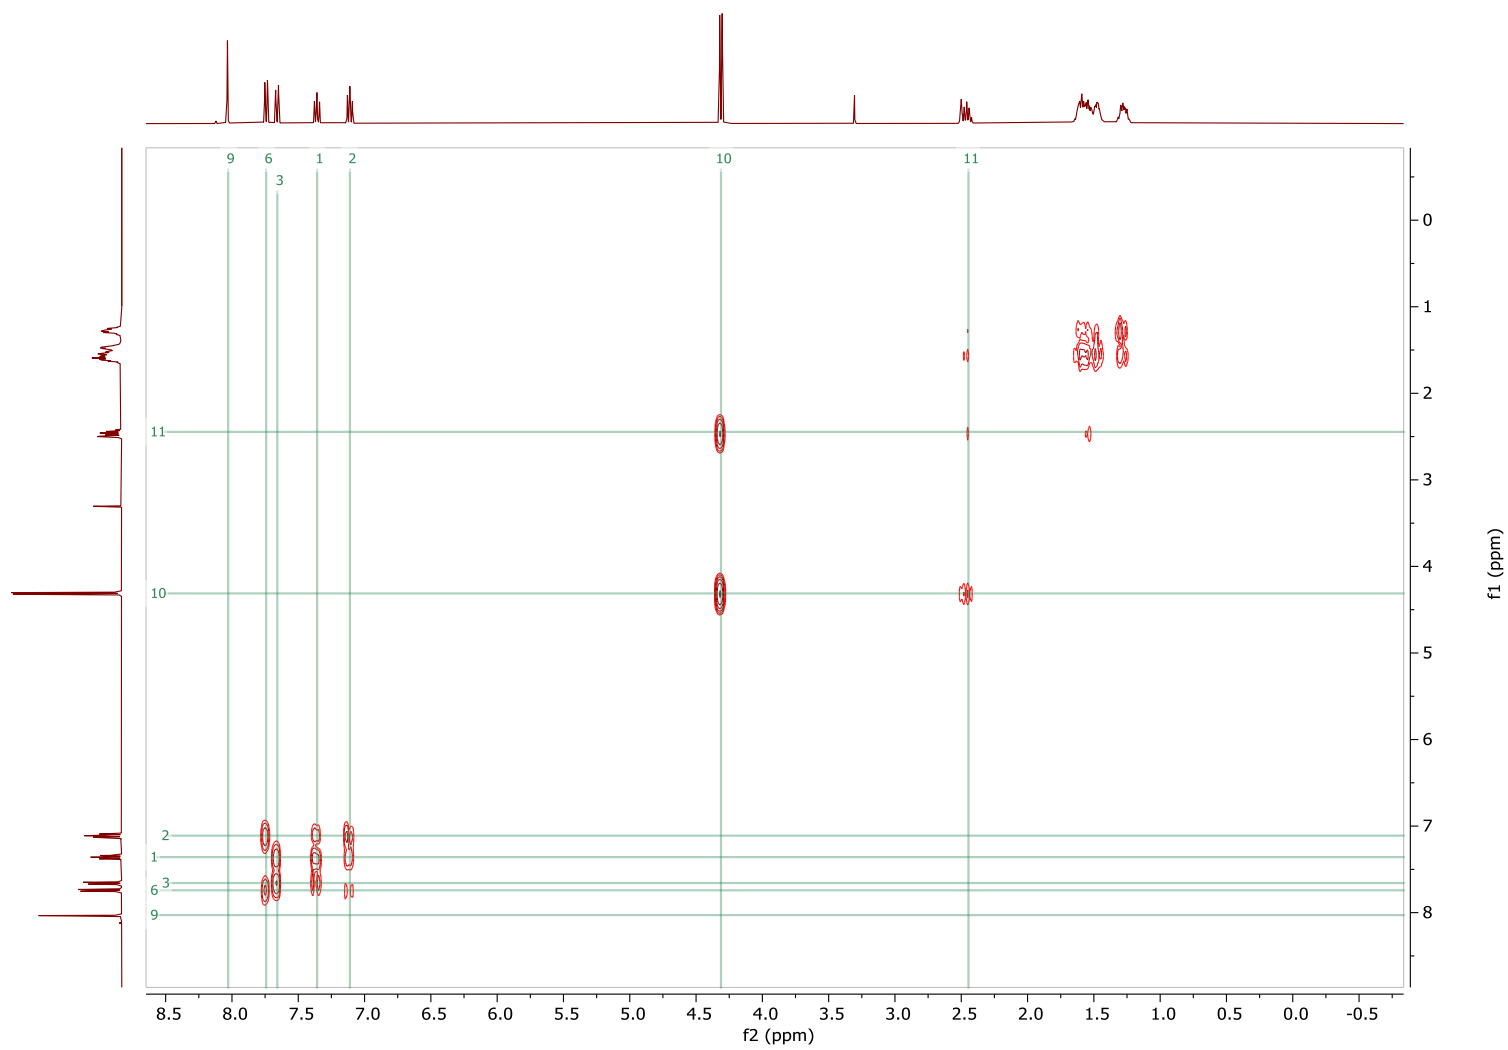

$^1\text{H}$ - $^{13}\text{C}$  HSQC (DMSO- $d_6$ )

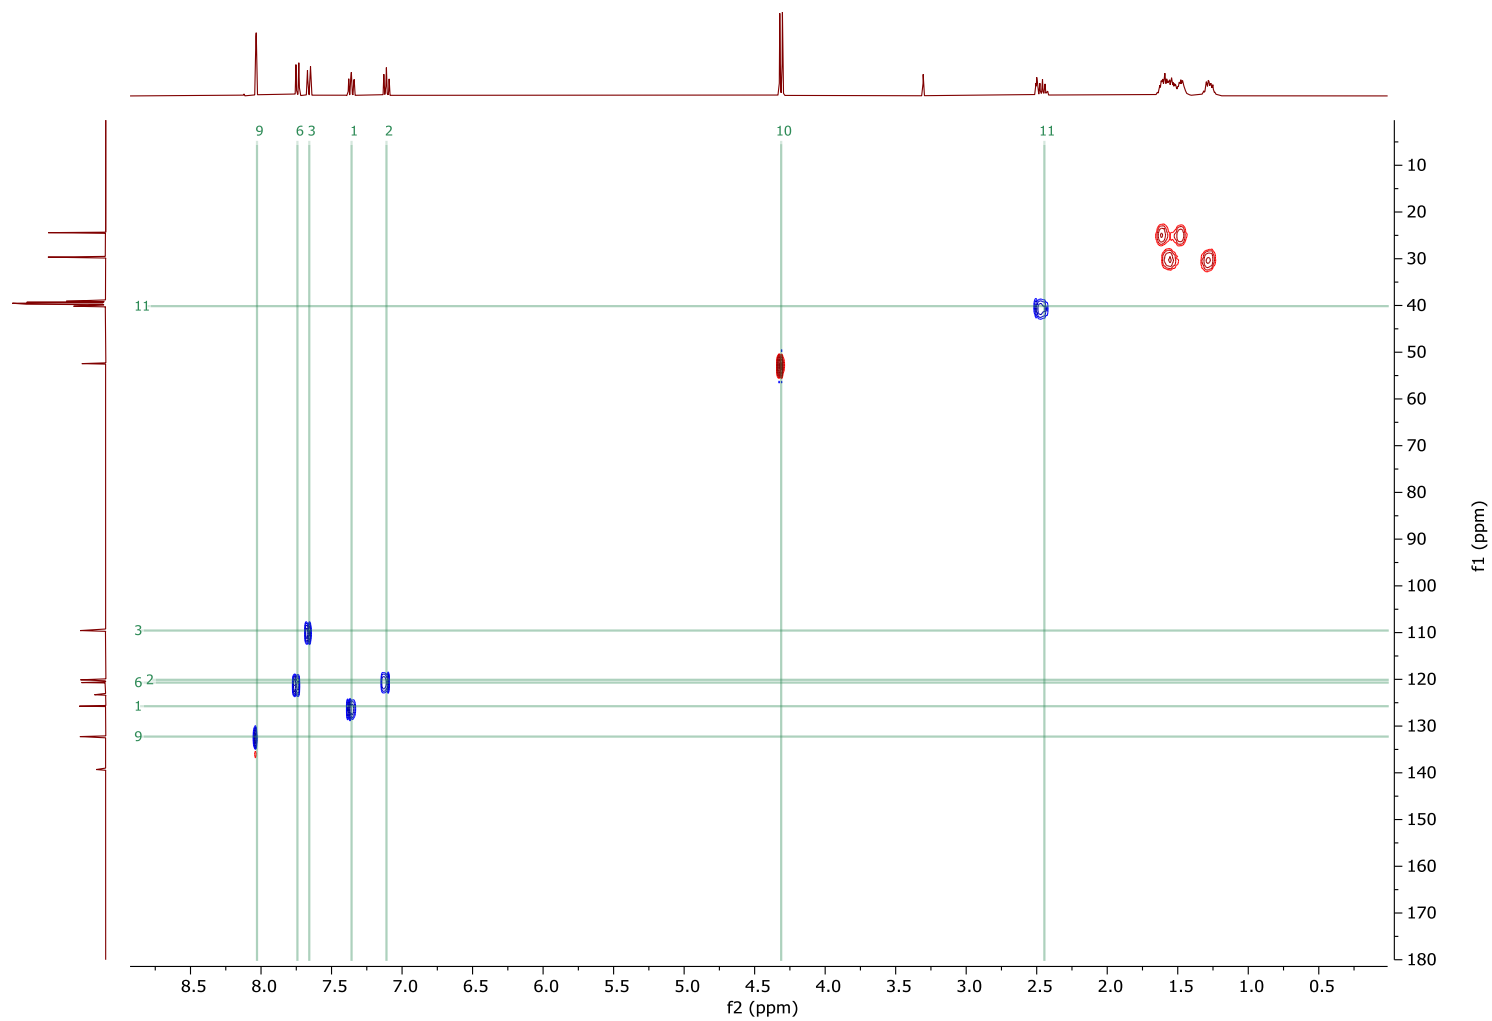

$^1\text{H}$ - $^{13}\text{C}$  HMBC (DMSO- $d_6$ )

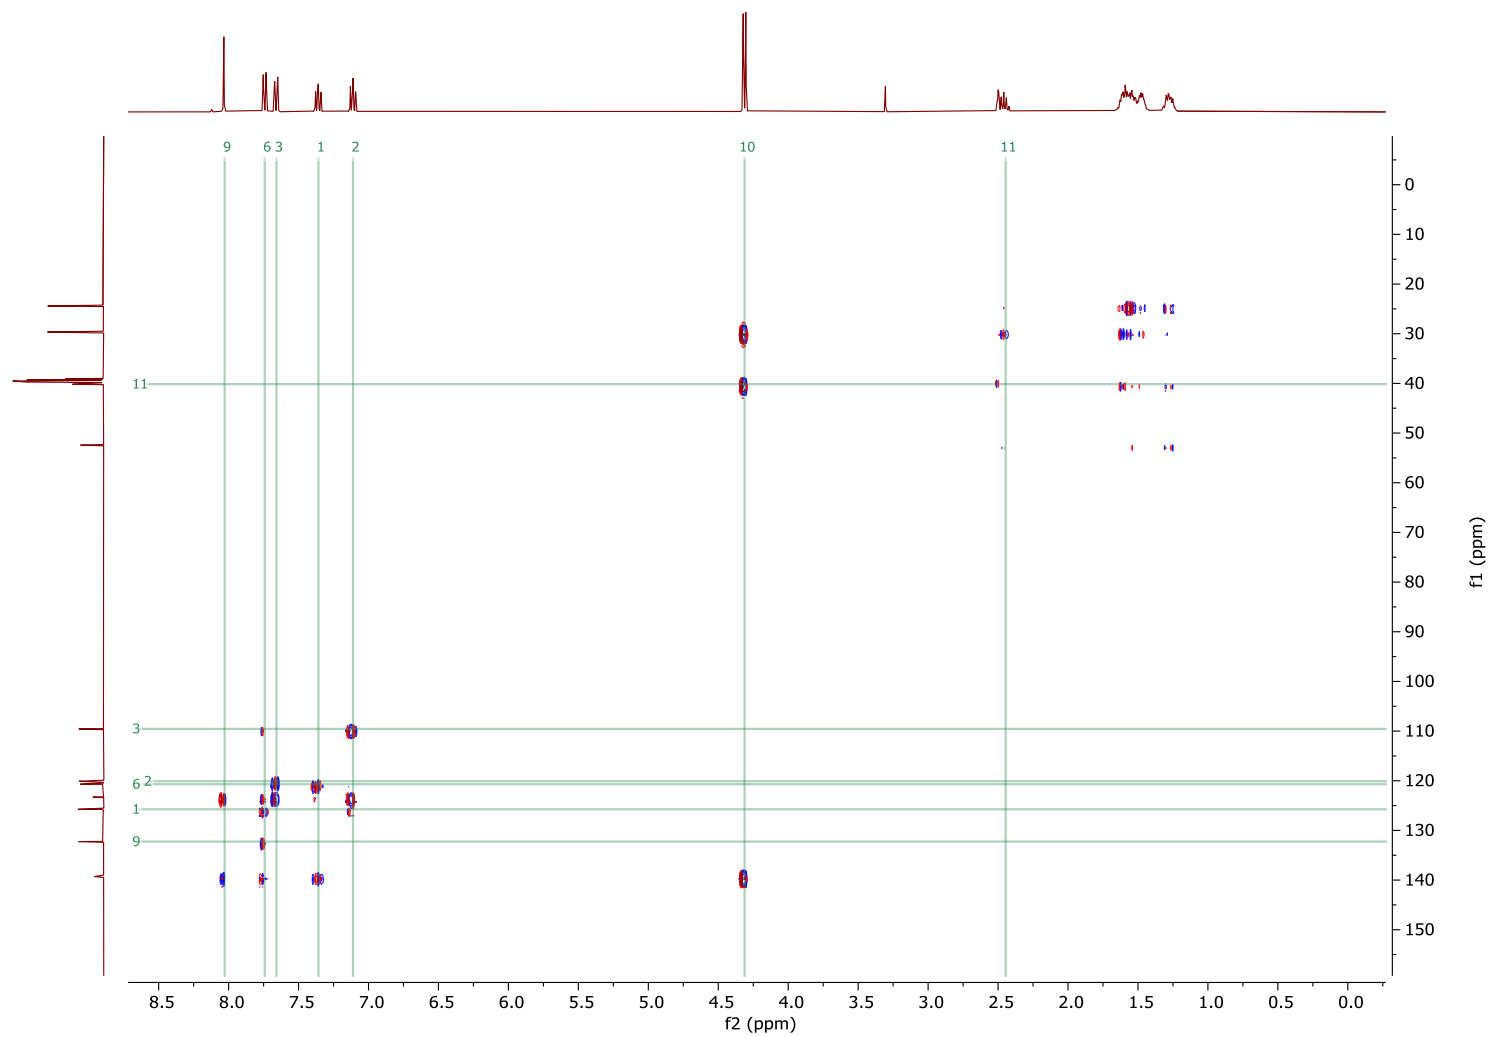

$^1\text{H}$ - $^1\text{H}$  NOESY (400 MHz, DMSO- $d_6$ )

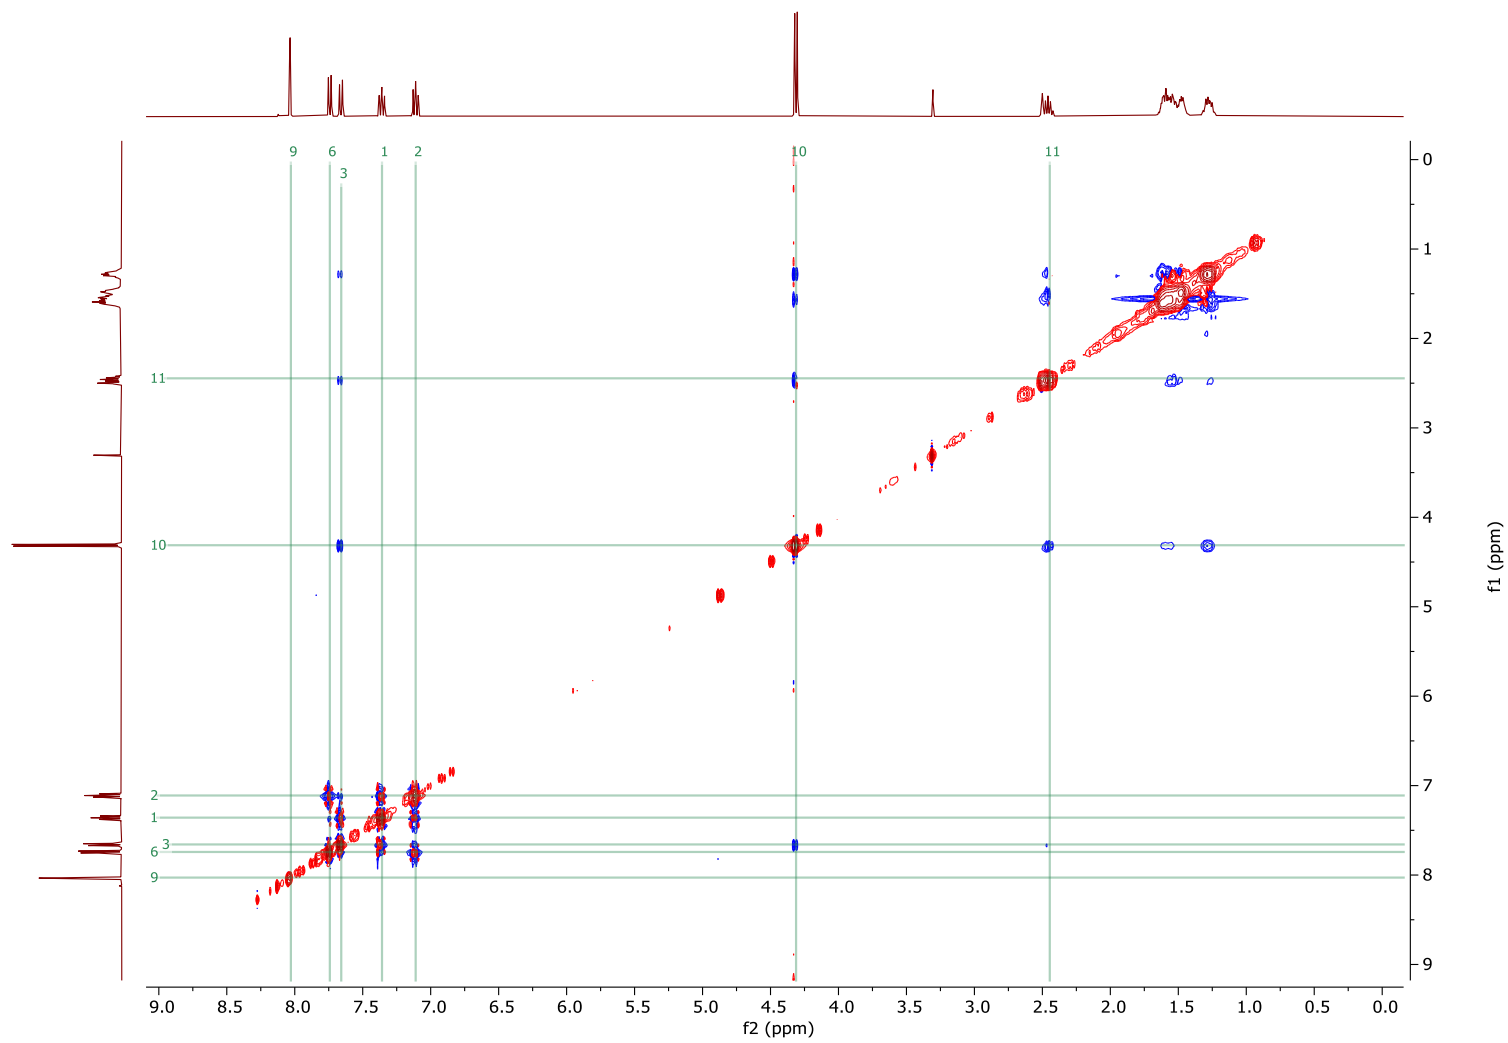

# 1-(2-methylbutyl)-1*H*-indazole (2p)

<sup>1</sup>H NMR (400 MHz, DMSO-*d*<sub>6</sub>)

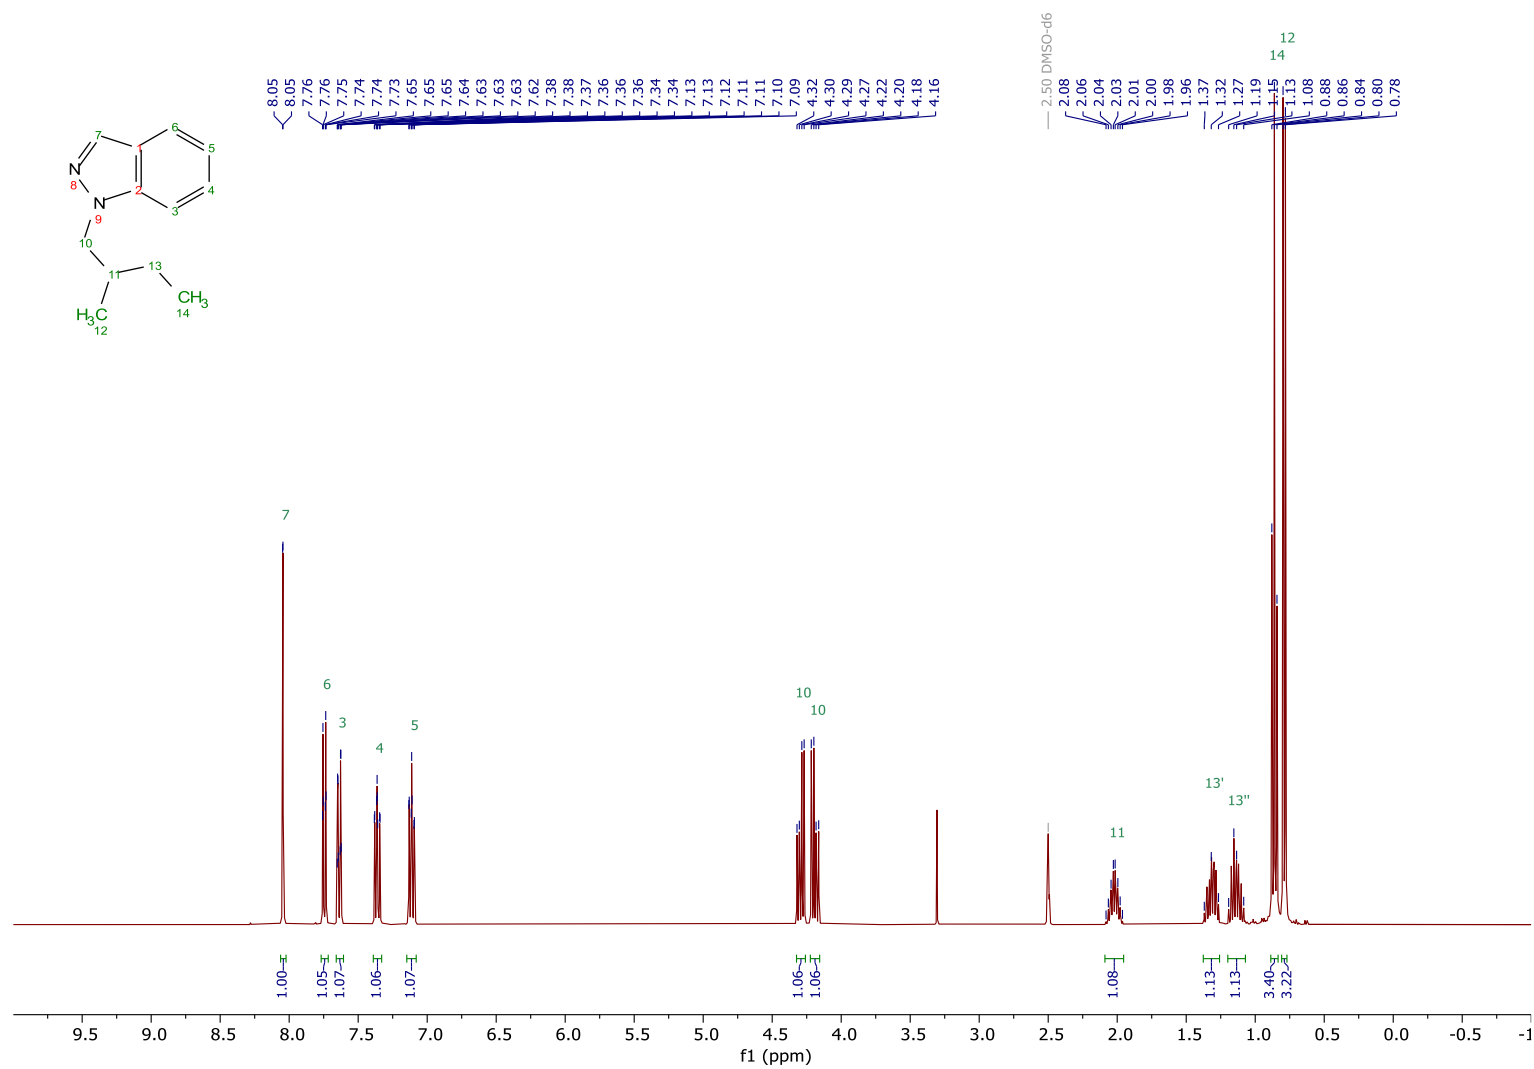

**$^{13}\text{C}$  NMR (101 MHz, DMSO- $d_6$ )**

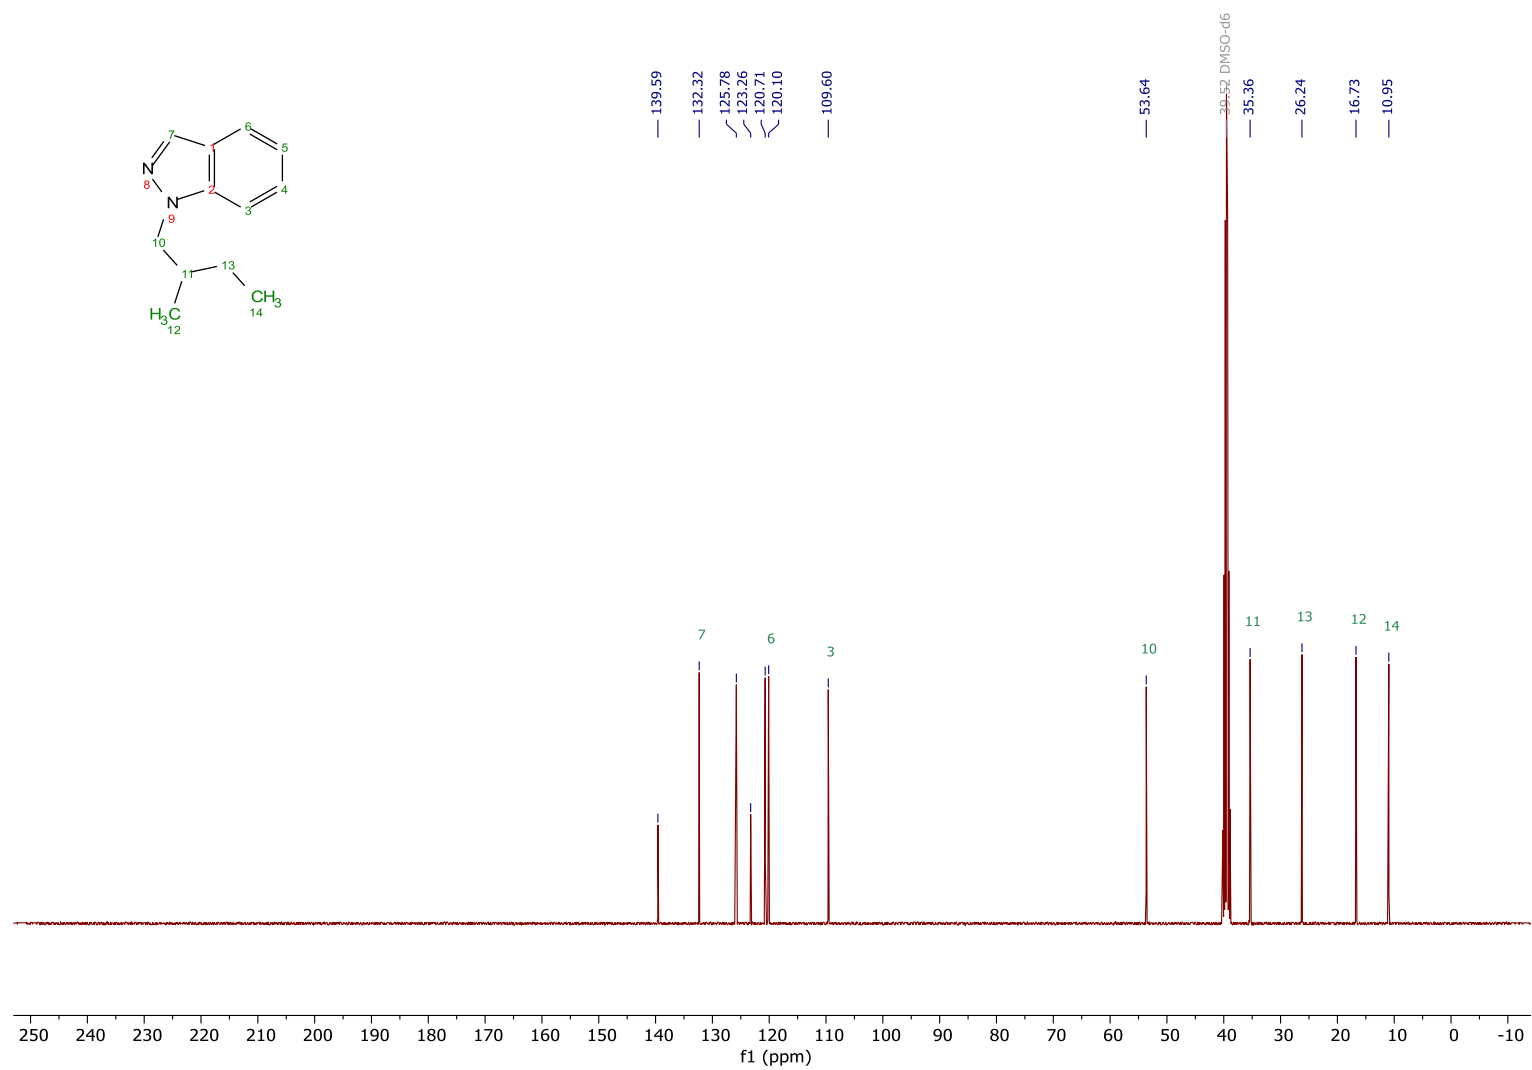

$^1\text{H}$ - $^1\text{H}$  COSY (400 MHz, DMSO- $d_6$ )

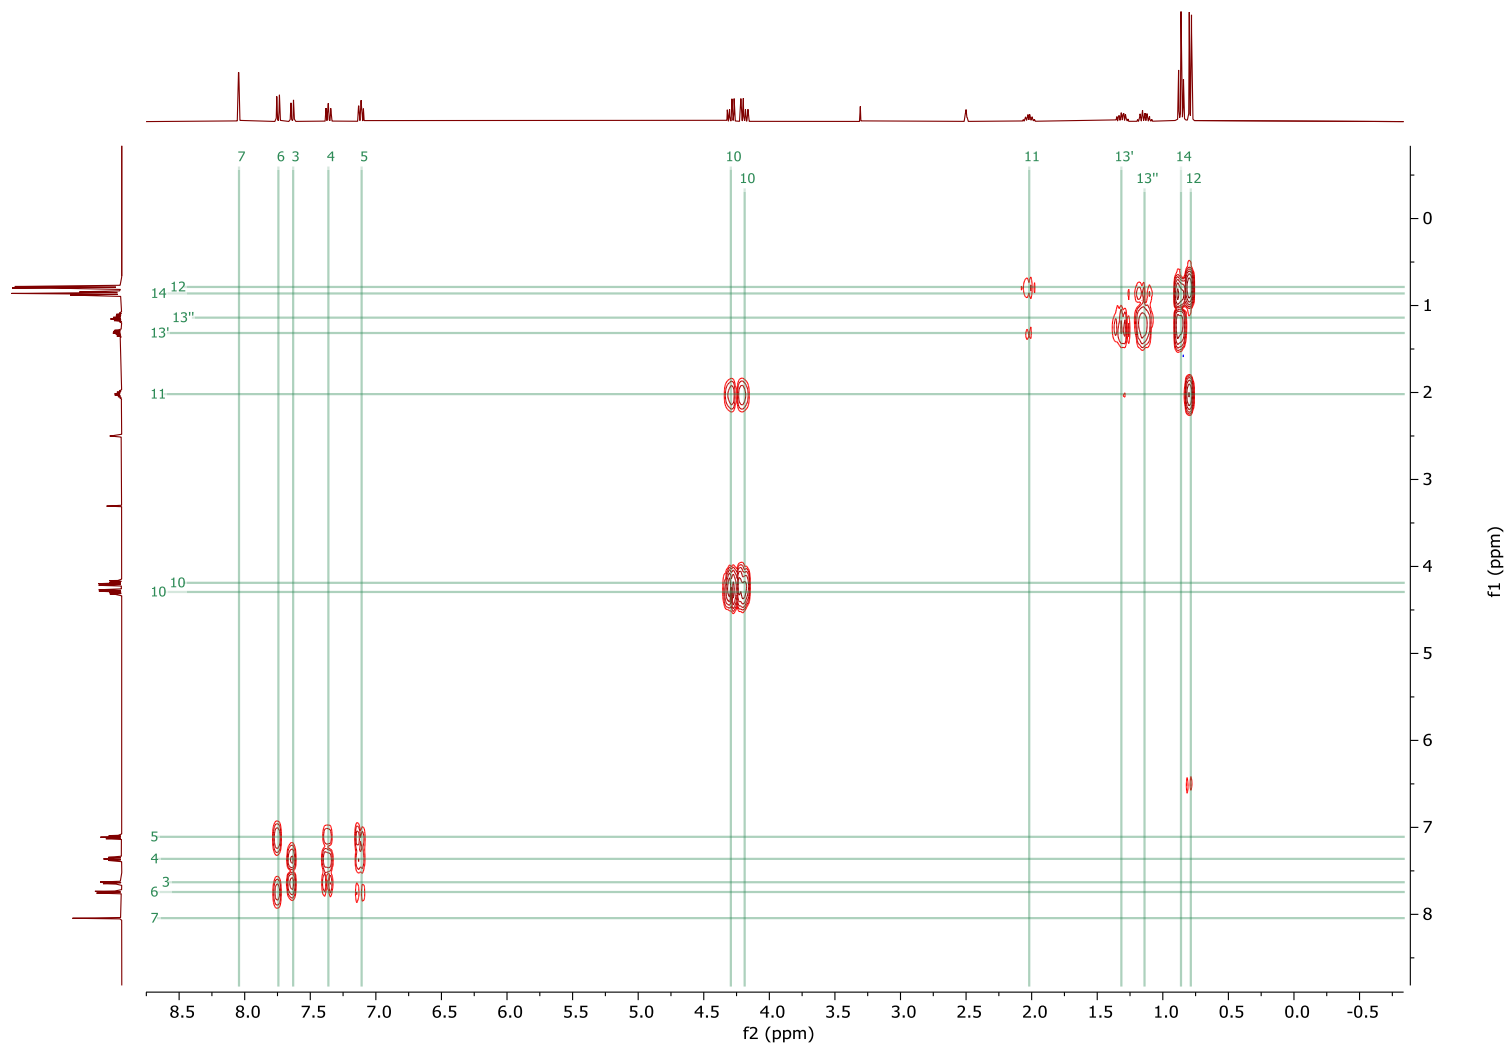

$^1\text{H}$ - $^{13}\text{C}$  HSQC (DMSO- $d_6$ )

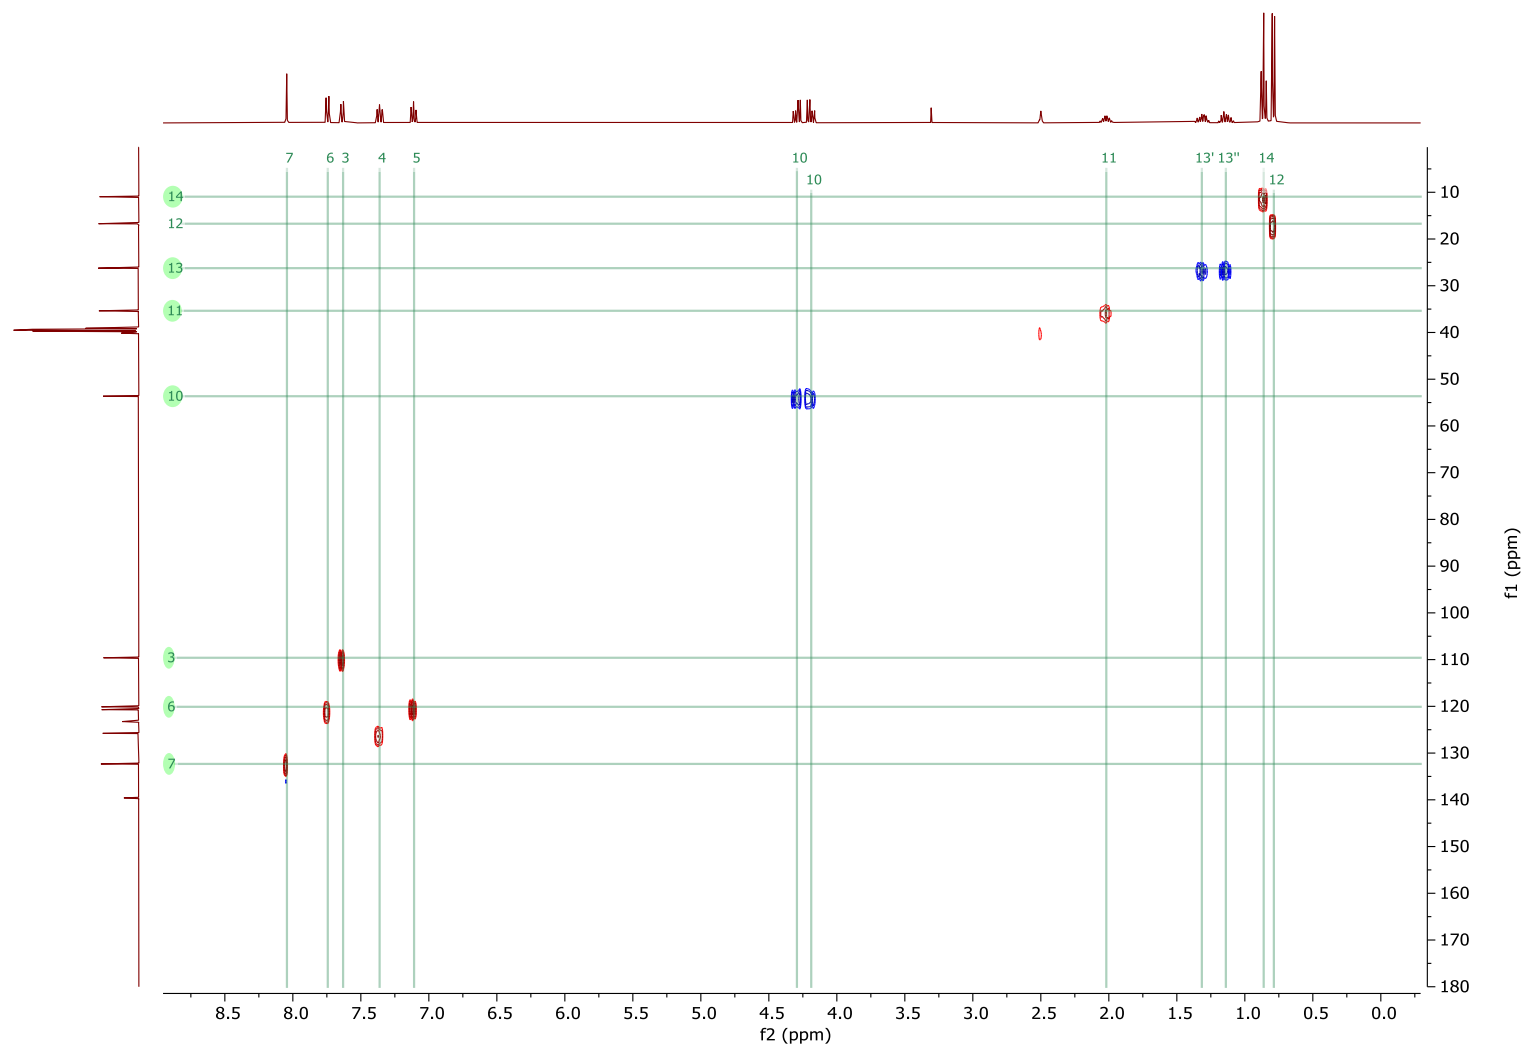

$^1\text{H}$ - $^{13}\text{C}$  HMBC (DMSO- $d_6$ )

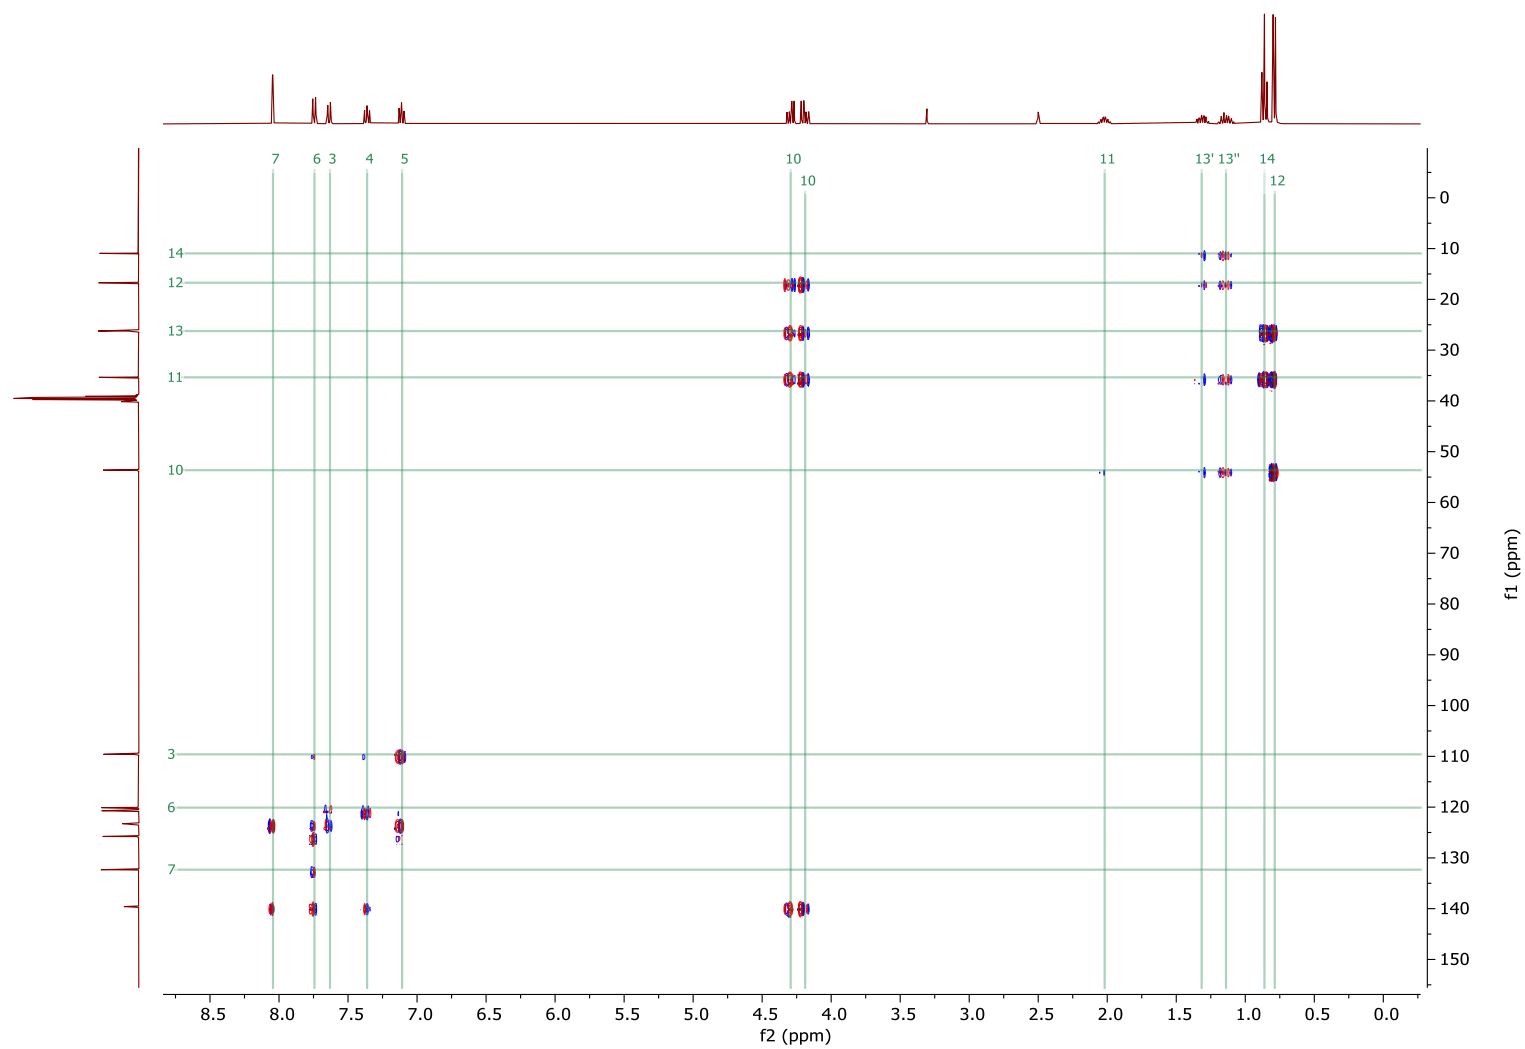

$^1\text{H}$ - $^1\text{H}$  NOESY (400 MHz, DMSO- $d_6$ )

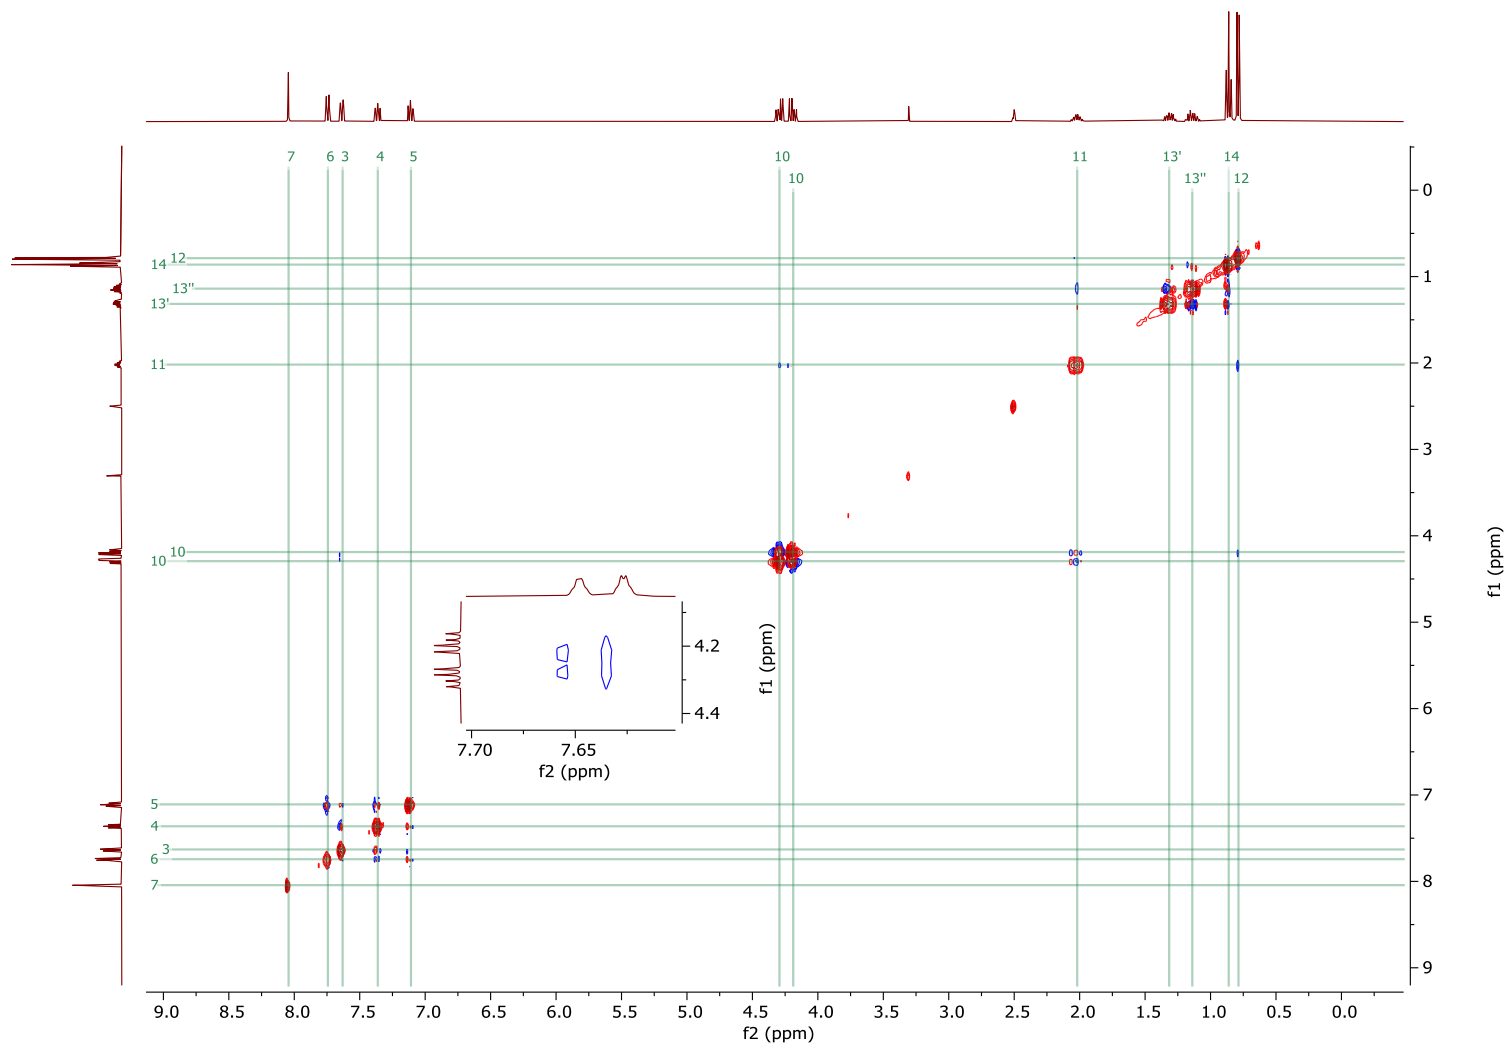

# 1-(2-ethylhexyl)-1H-indazole (2q)

<sup>1</sup>H NMR (400 MHz, DMSO-d<sub>6</sub>)

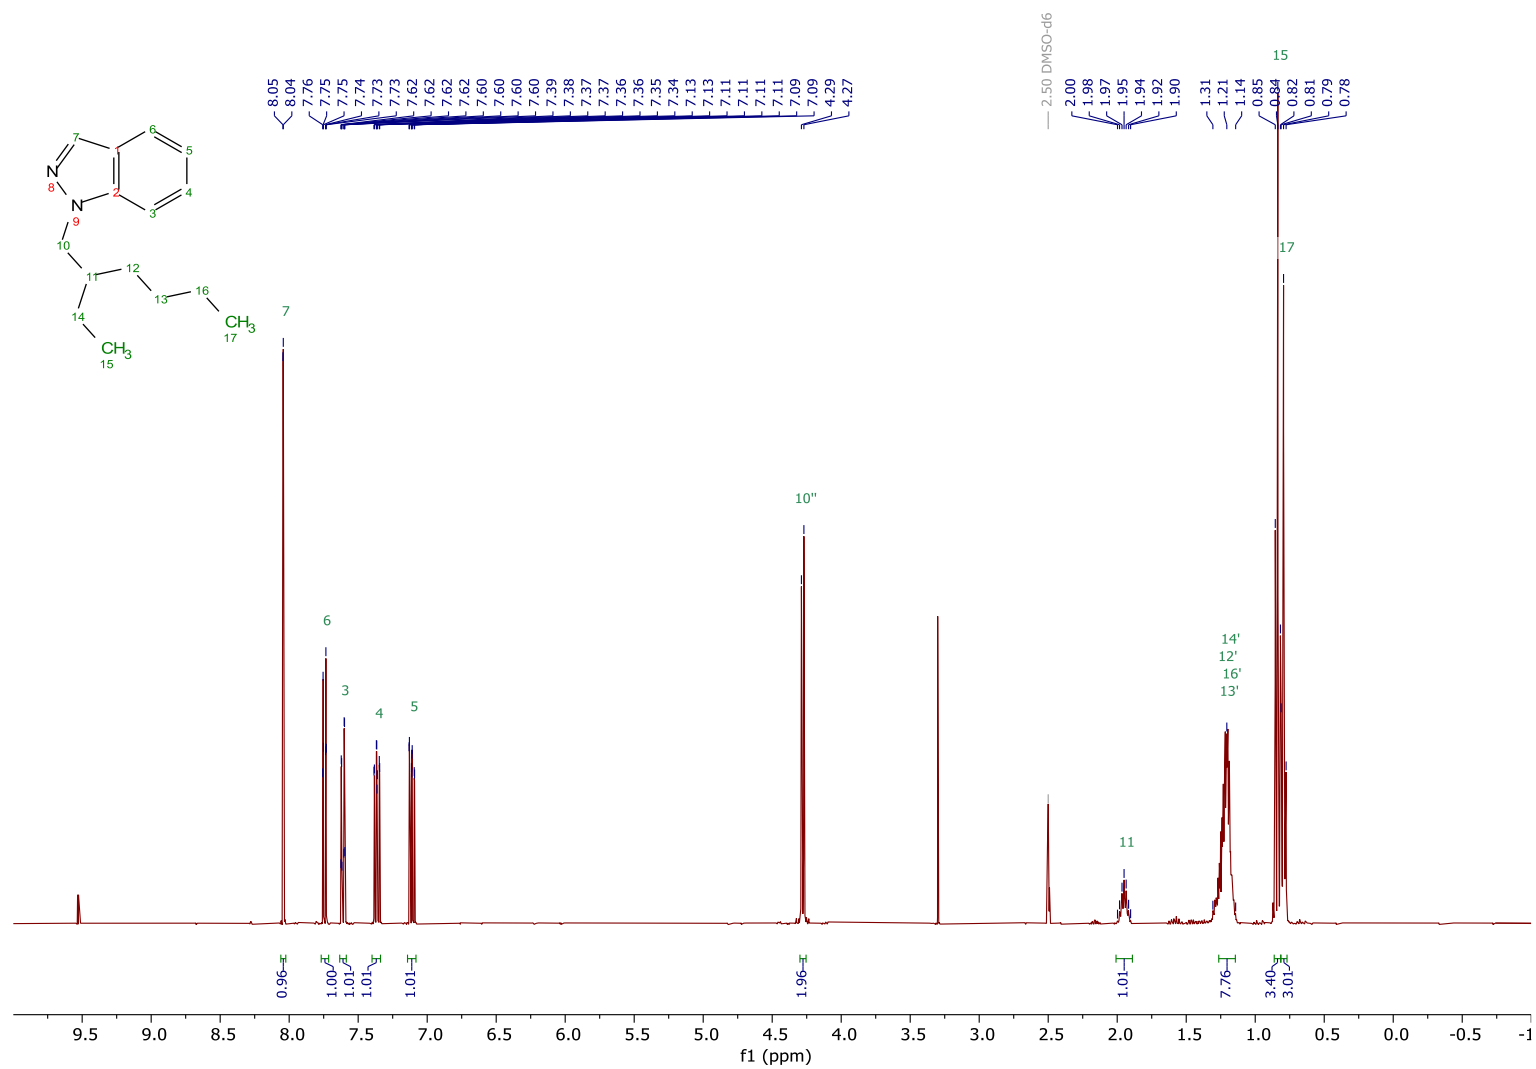

**$^{13}\text{C}$  NMR (101 MHz, DMSO- $d_6$ )**

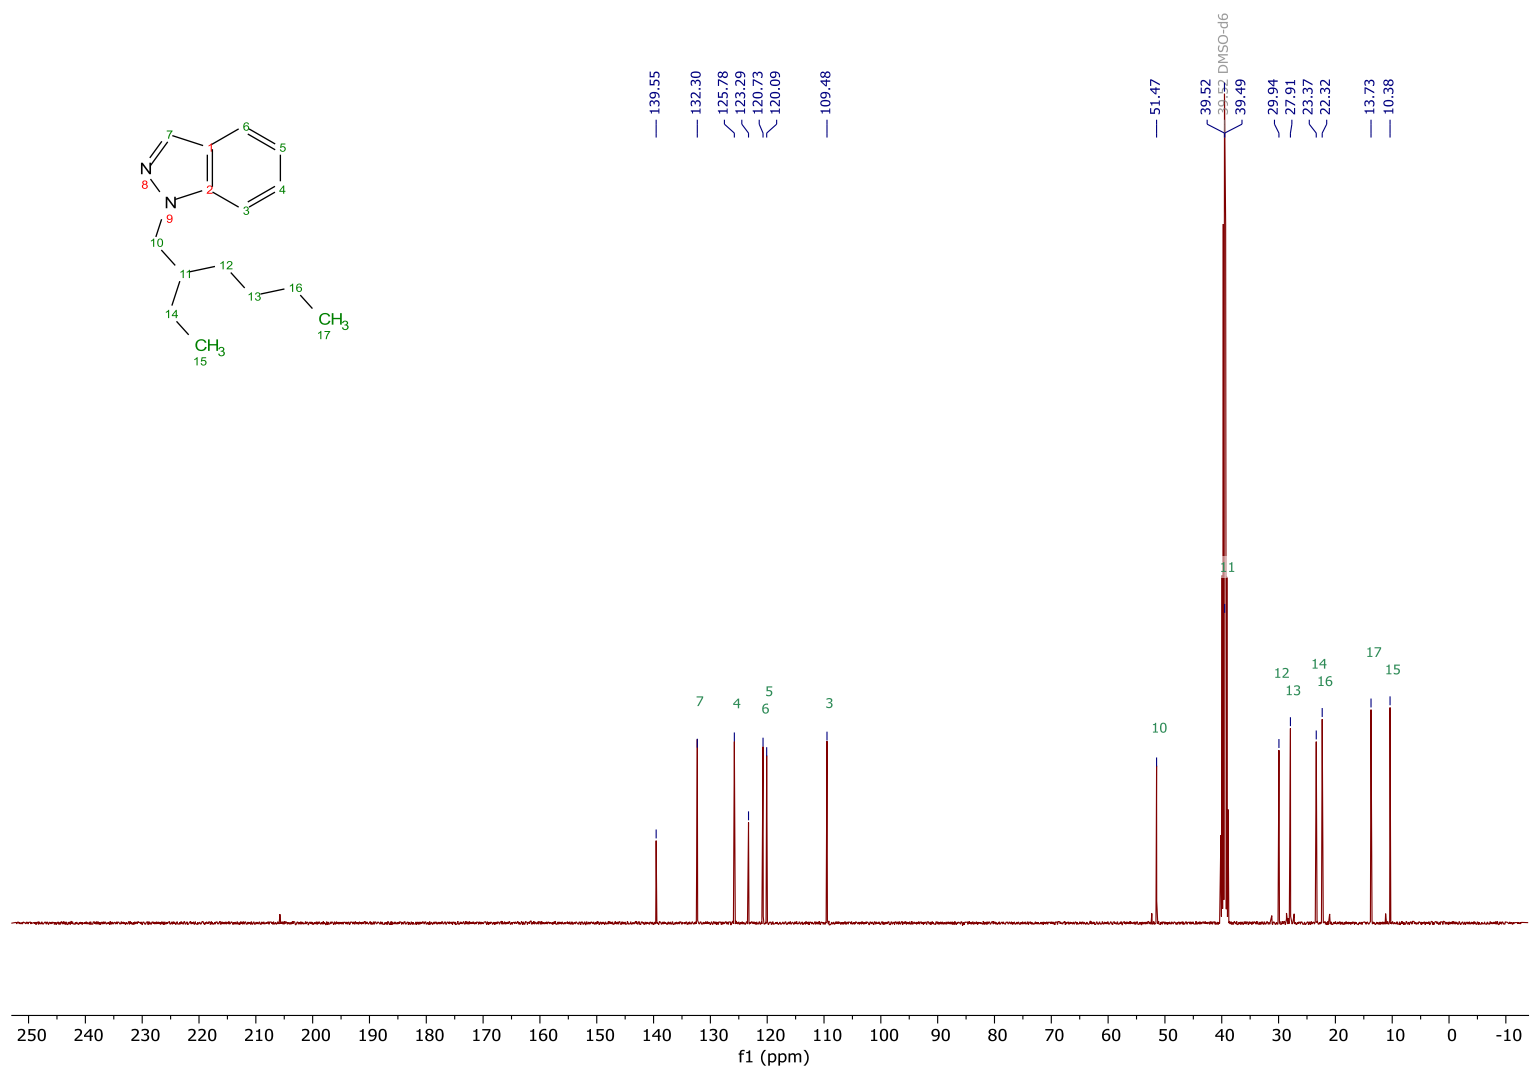

$^1\text{H}$ - $^1\text{H}$  COSY (400 MHz, DMSO- $d_6$ )

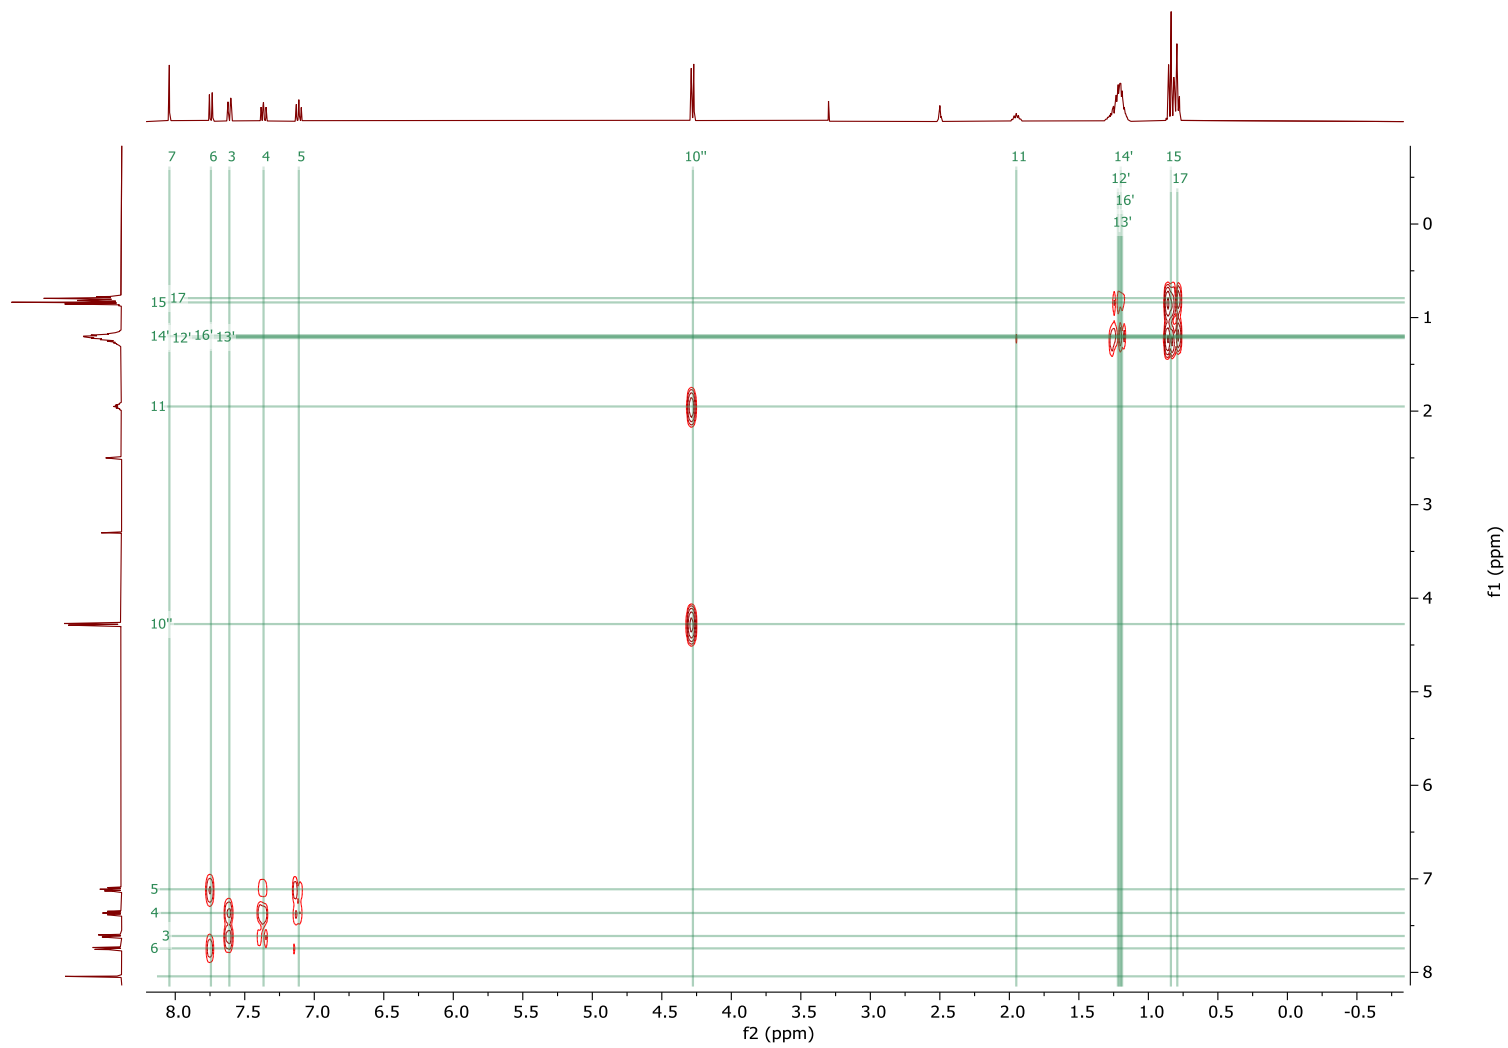

$^1\text{H}$ - $^{13}\text{C}$  HSQC (DMSO- $d_6$ )

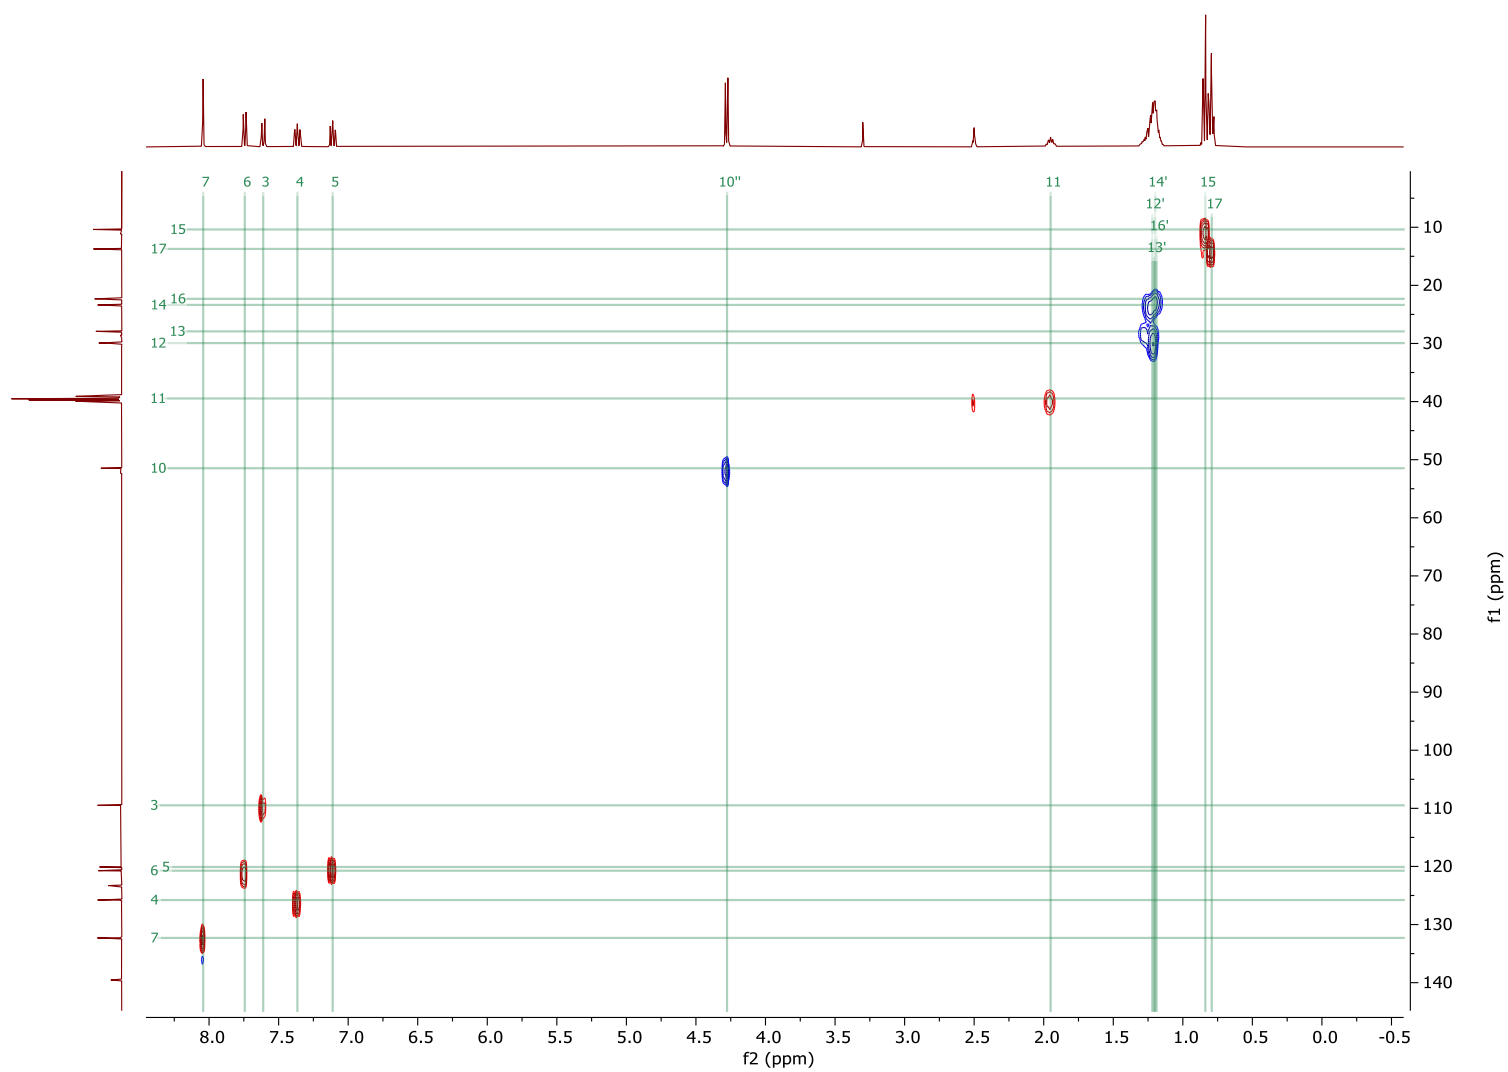

$^1\text{H}$ - $^{13}\text{C}$  HMBC (DMSO- $d_6$ )

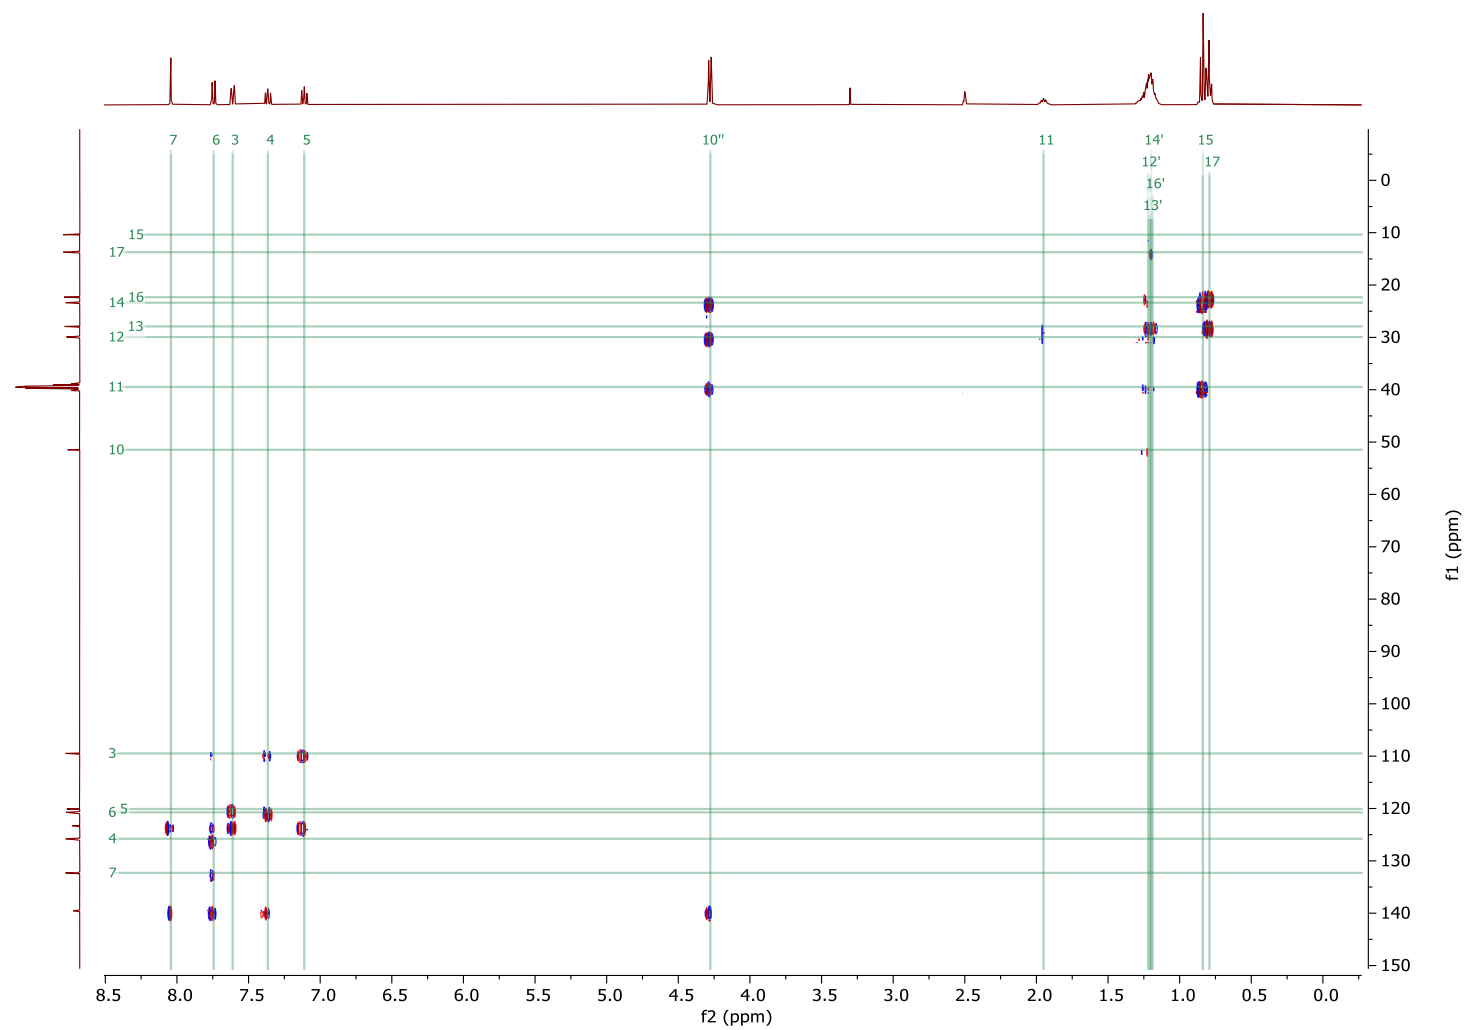

$^1\text{H}$ - $^1\text{H}$  NOESY (400 MHz, DMSO- $d_6$ )

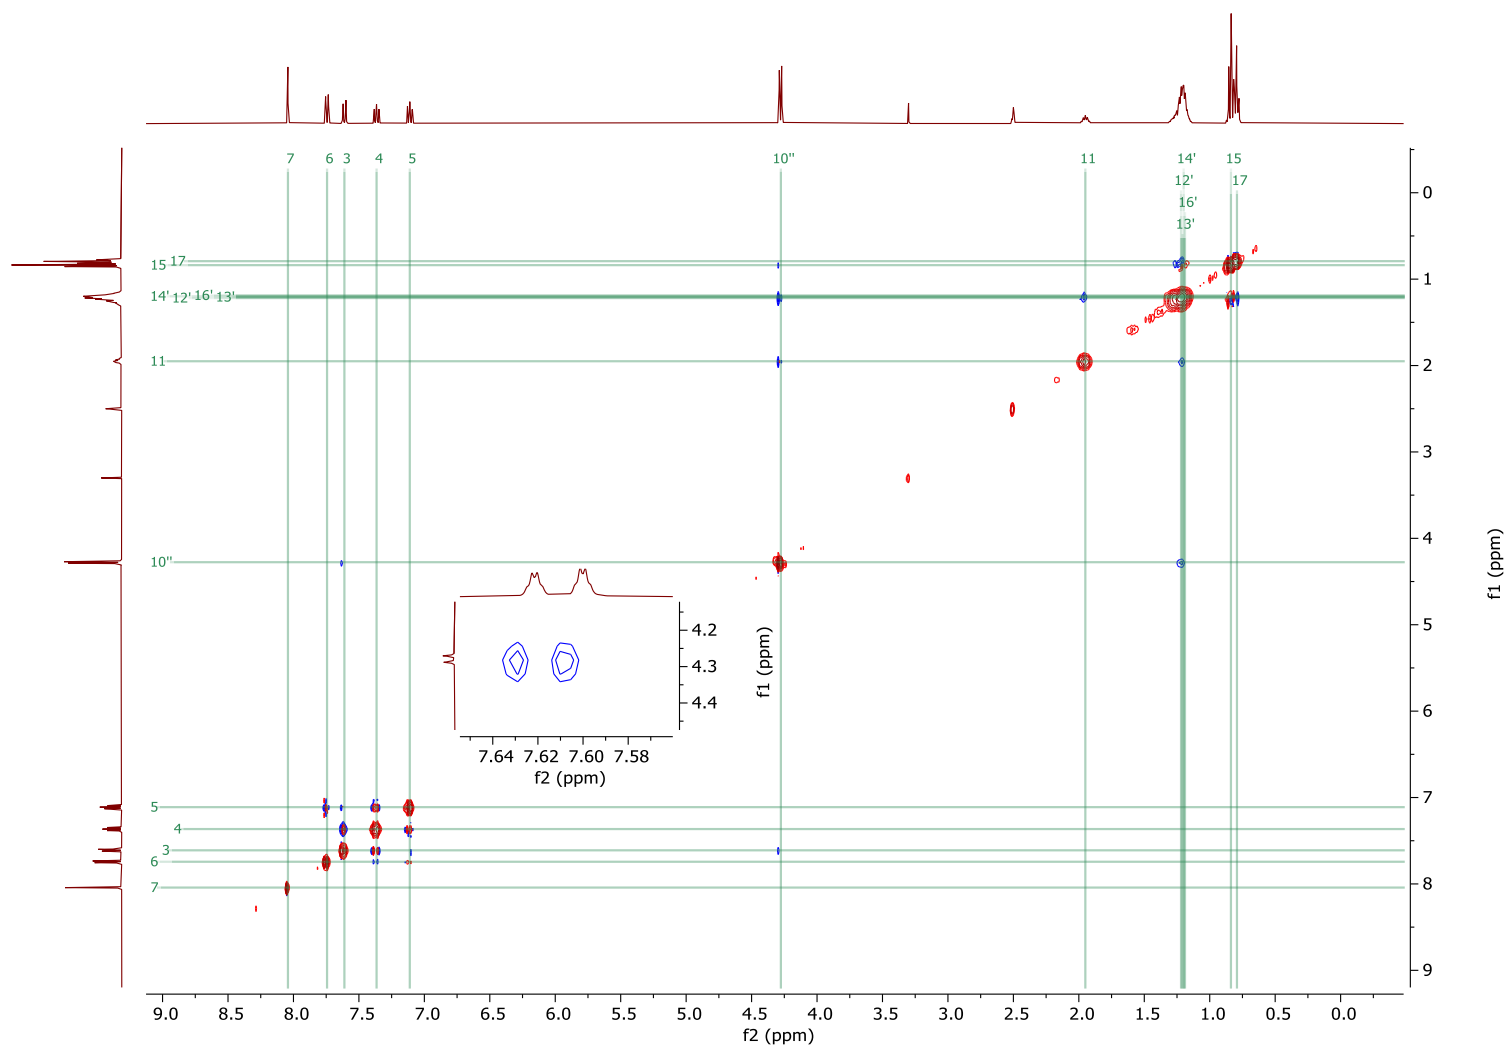

**1-((tetrahydro-2H-pyran-4-yl)methyl)-1H-indazole (2r)**

**<sup>1</sup>H NMR (400 MHz, DMSO-*d*<sub>6</sub>)**

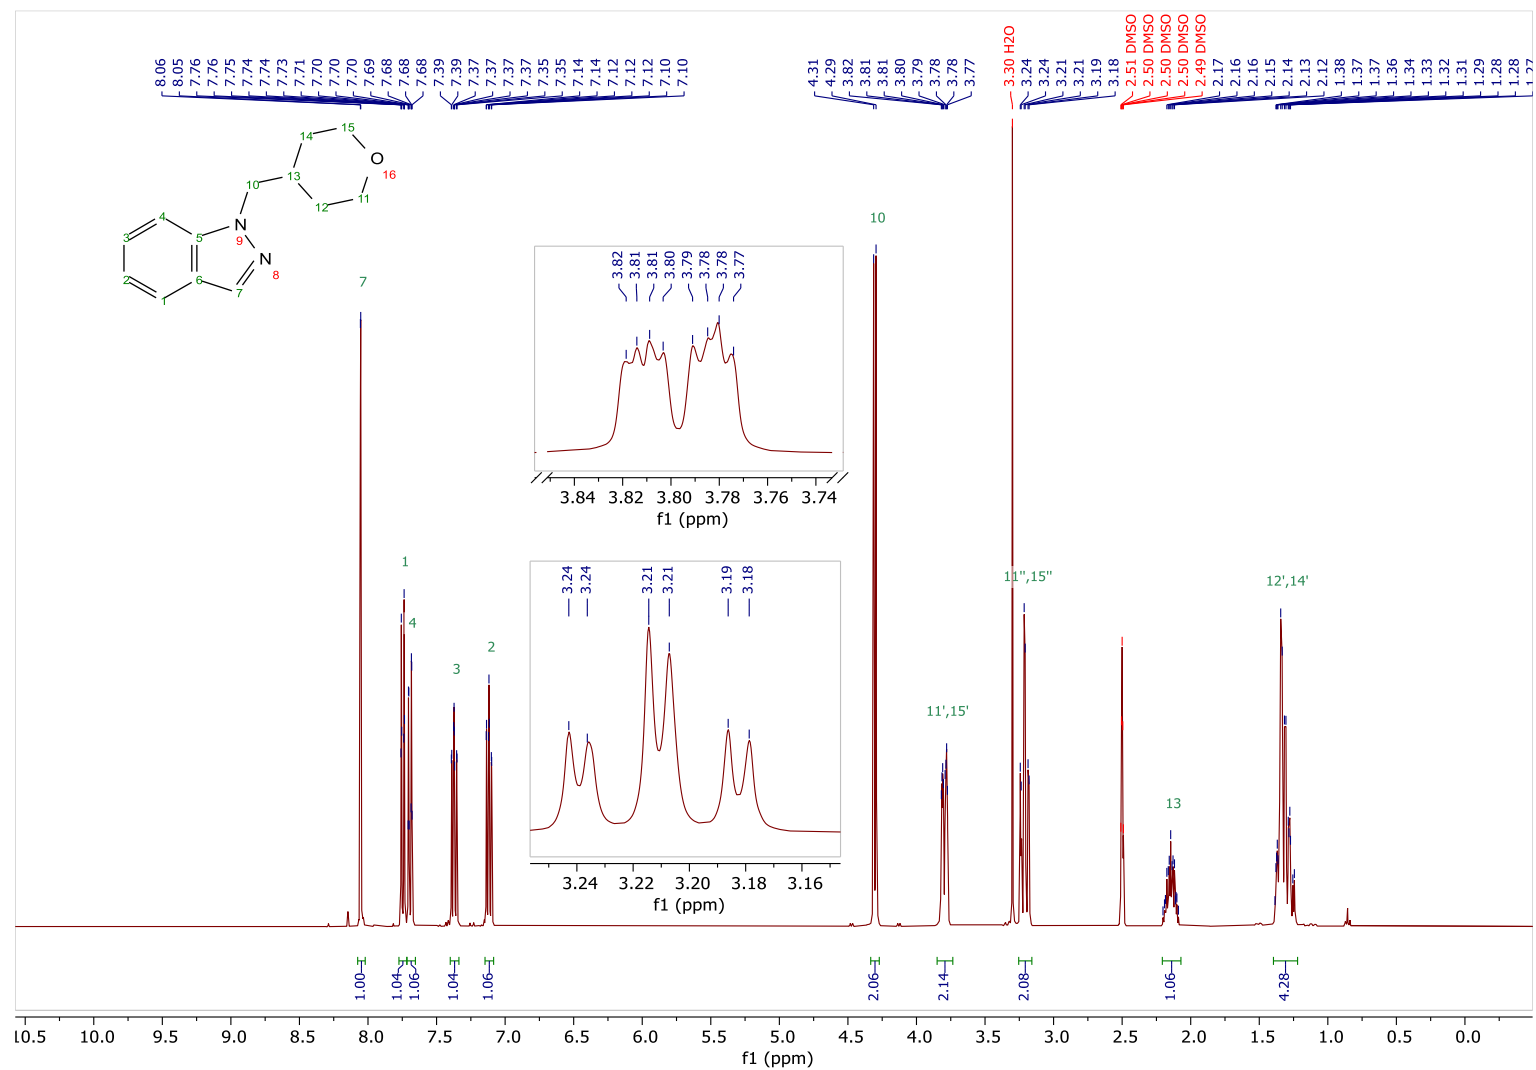

**$^{13}\text{C}$  NMR (101 MHz, DMSO- $d_6$ )**

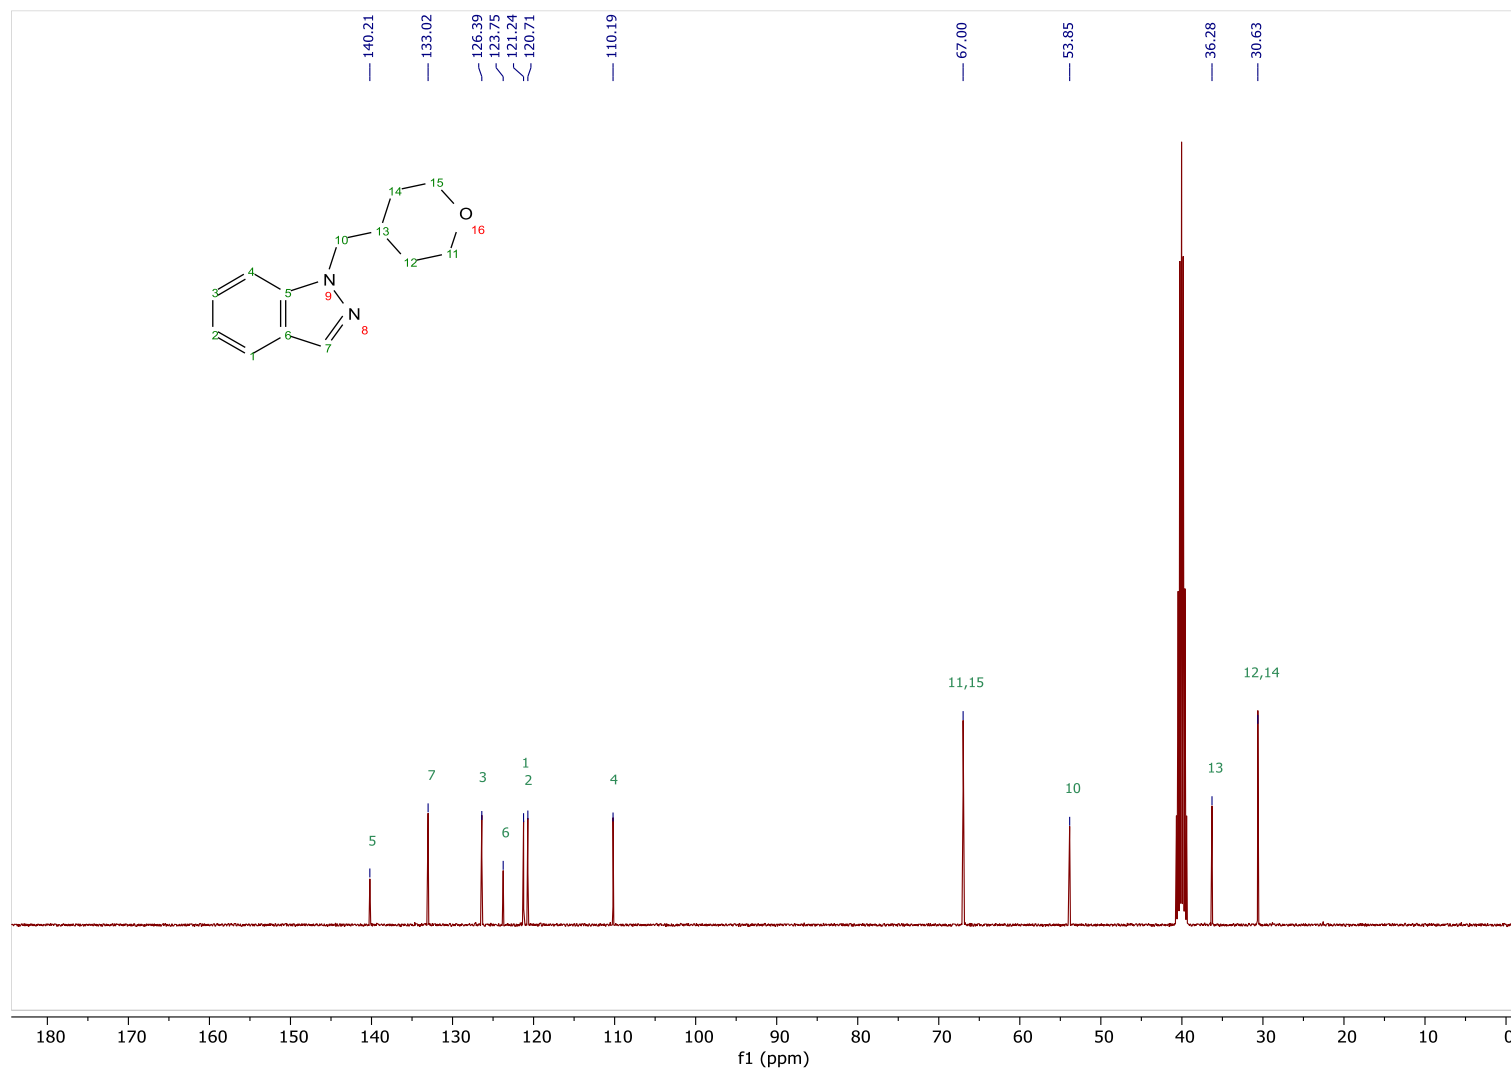

$^1\text{H}$ - $^1\text{H}$  COSY (400 MHz, DMSO- $d_6$ )

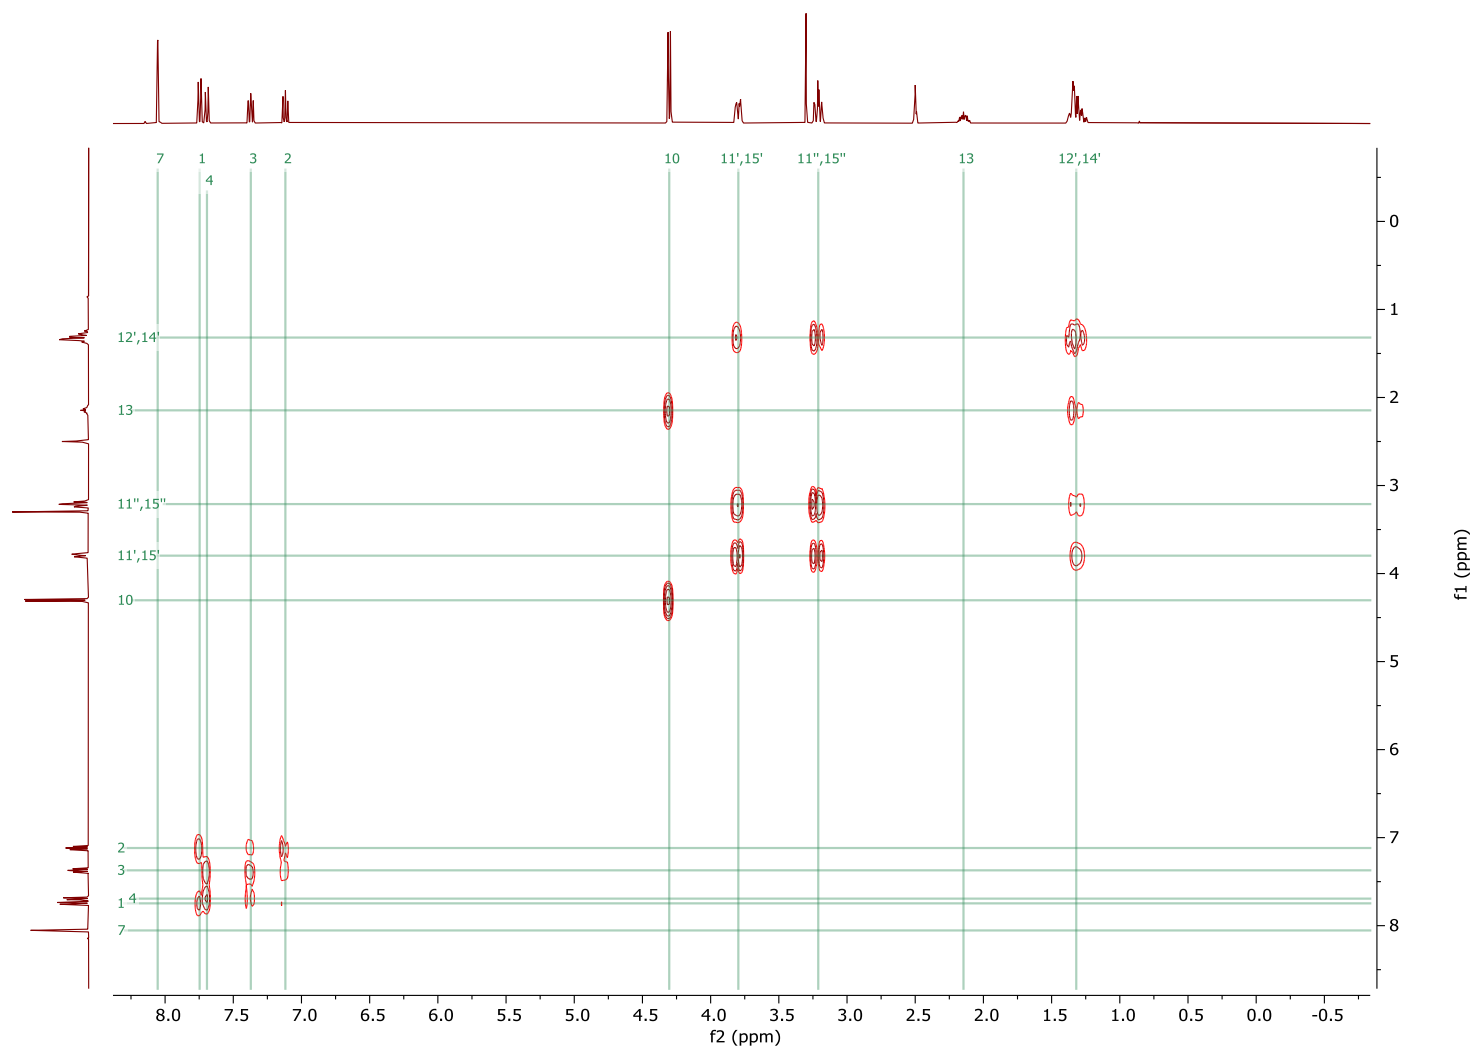

$^1\text{H}$ - $^{13}\text{C}$  HSQC (DMSO- $d_6$ )

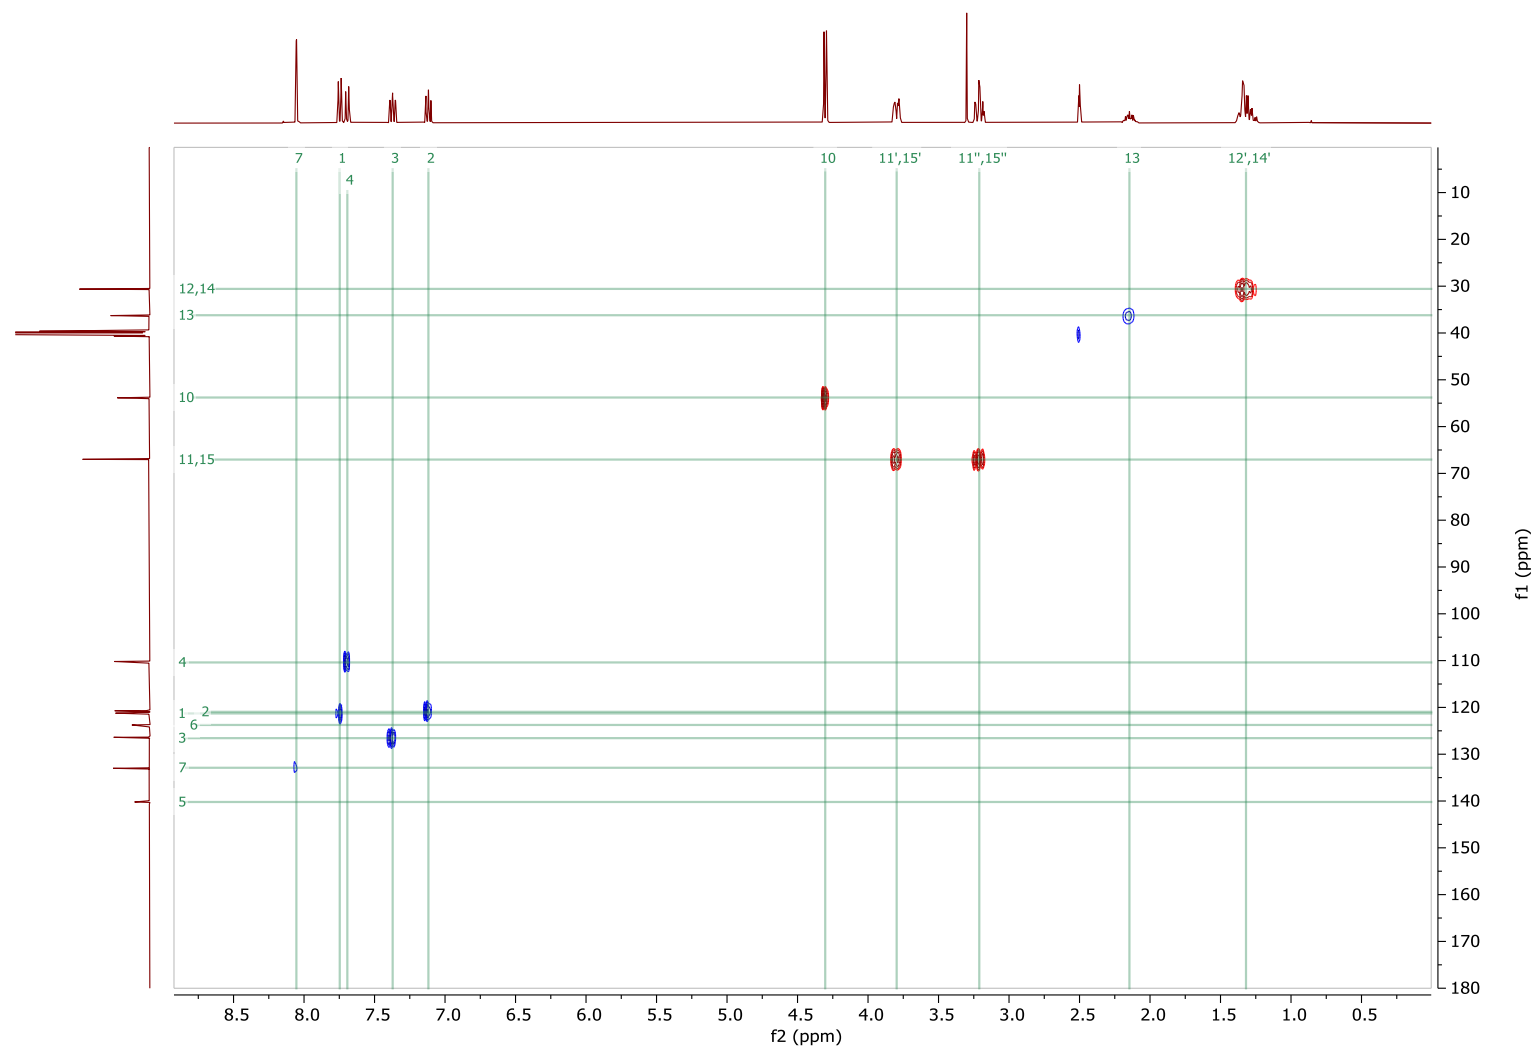

$^1\text{H}$ - $^{13}\text{C}$  HMBC (DMSO- $d_6$ )

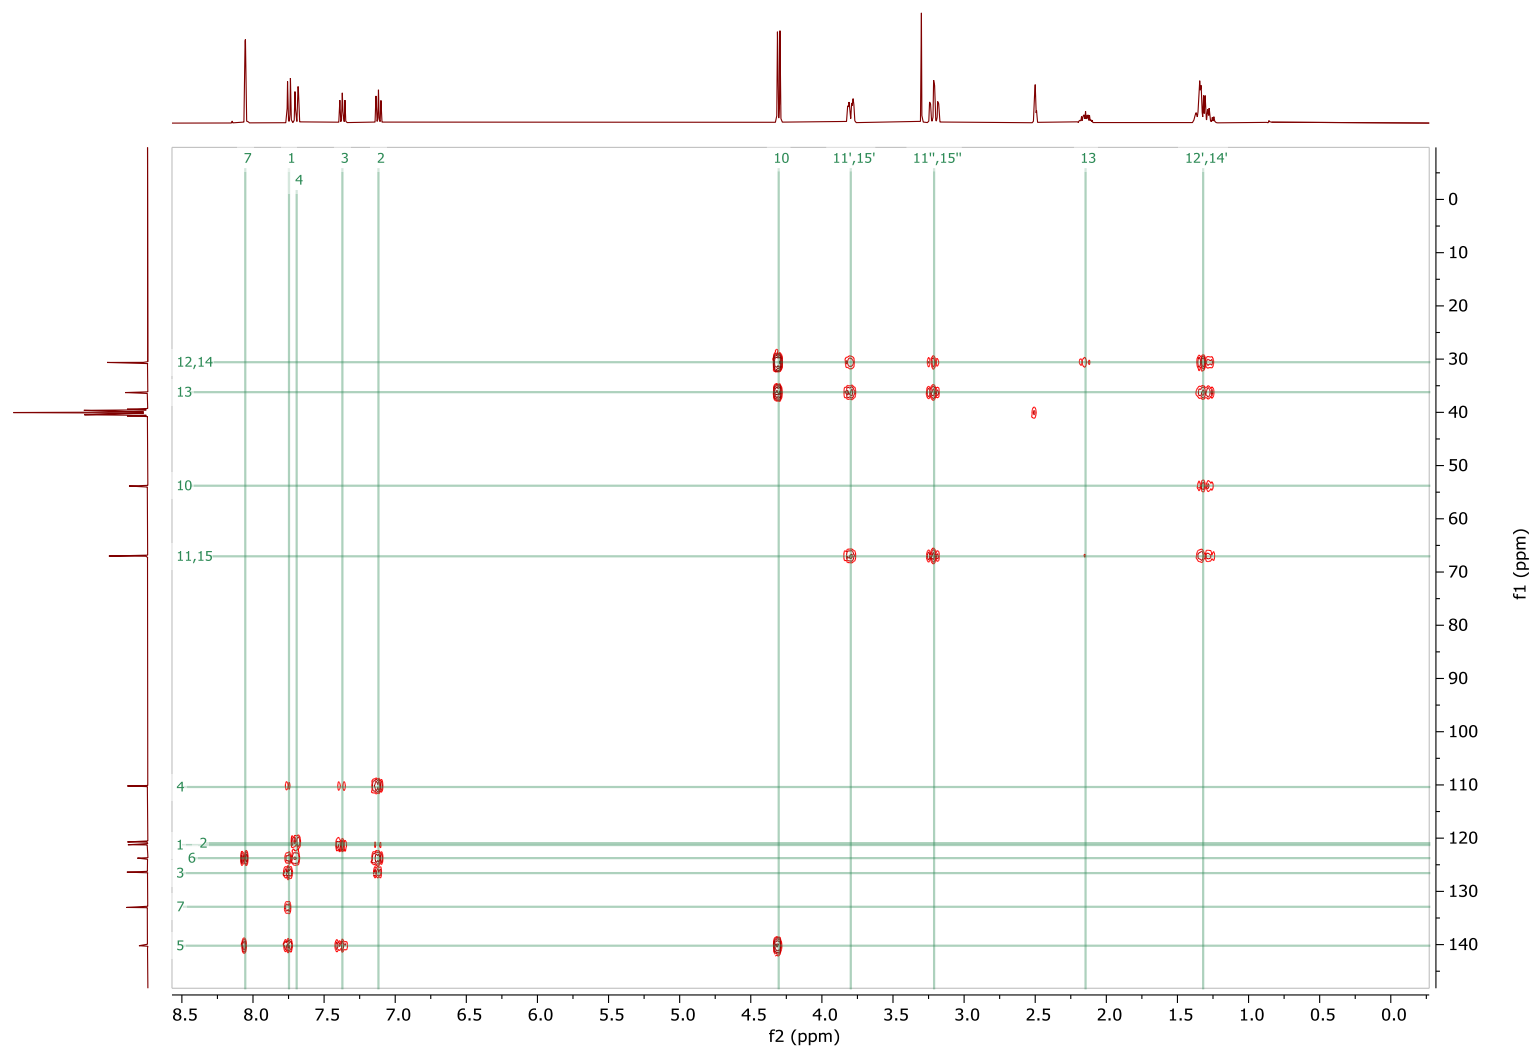

$^1\text{H}$ - $^1\text{H}$  NOESY (400 MHz,  $\text{DMSO}-d_6$ )

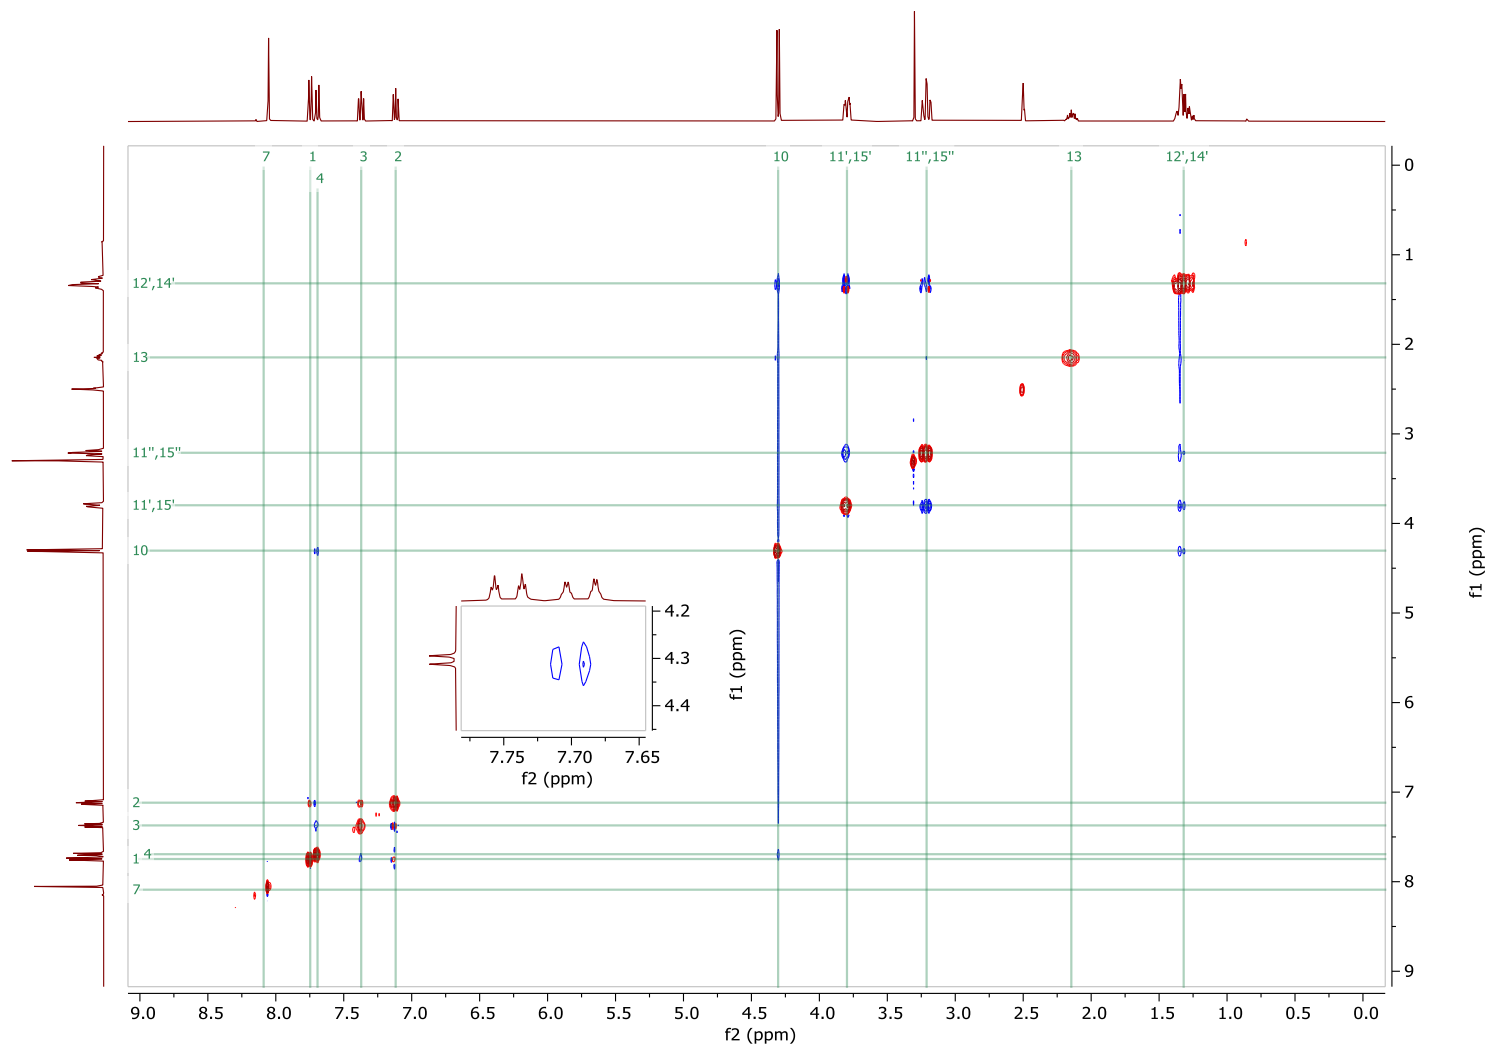

**Methyl 1-isopentyl-1*H*-indazole-3-carboxylate (2s)**

**<sup>1</sup>H NMR (400 MHz, CDCl<sub>3</sub>)**

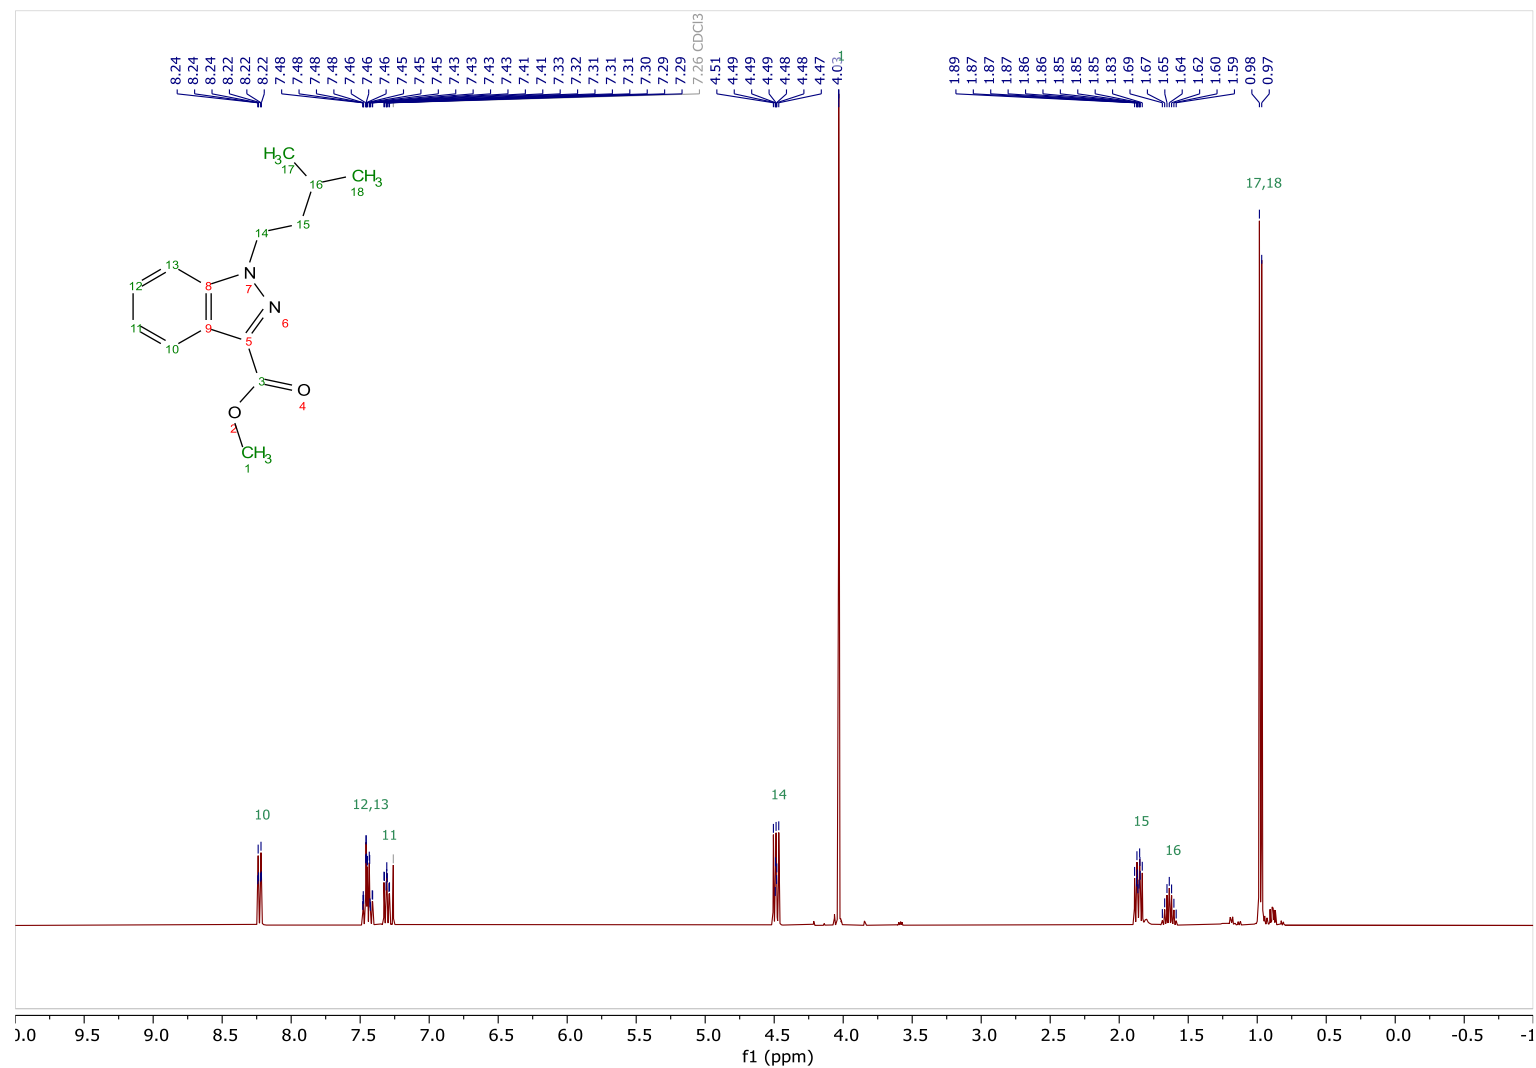

**$^{13}\text{C}$  NMR (101 MHz,  $\text{CDCl}_3$ )**

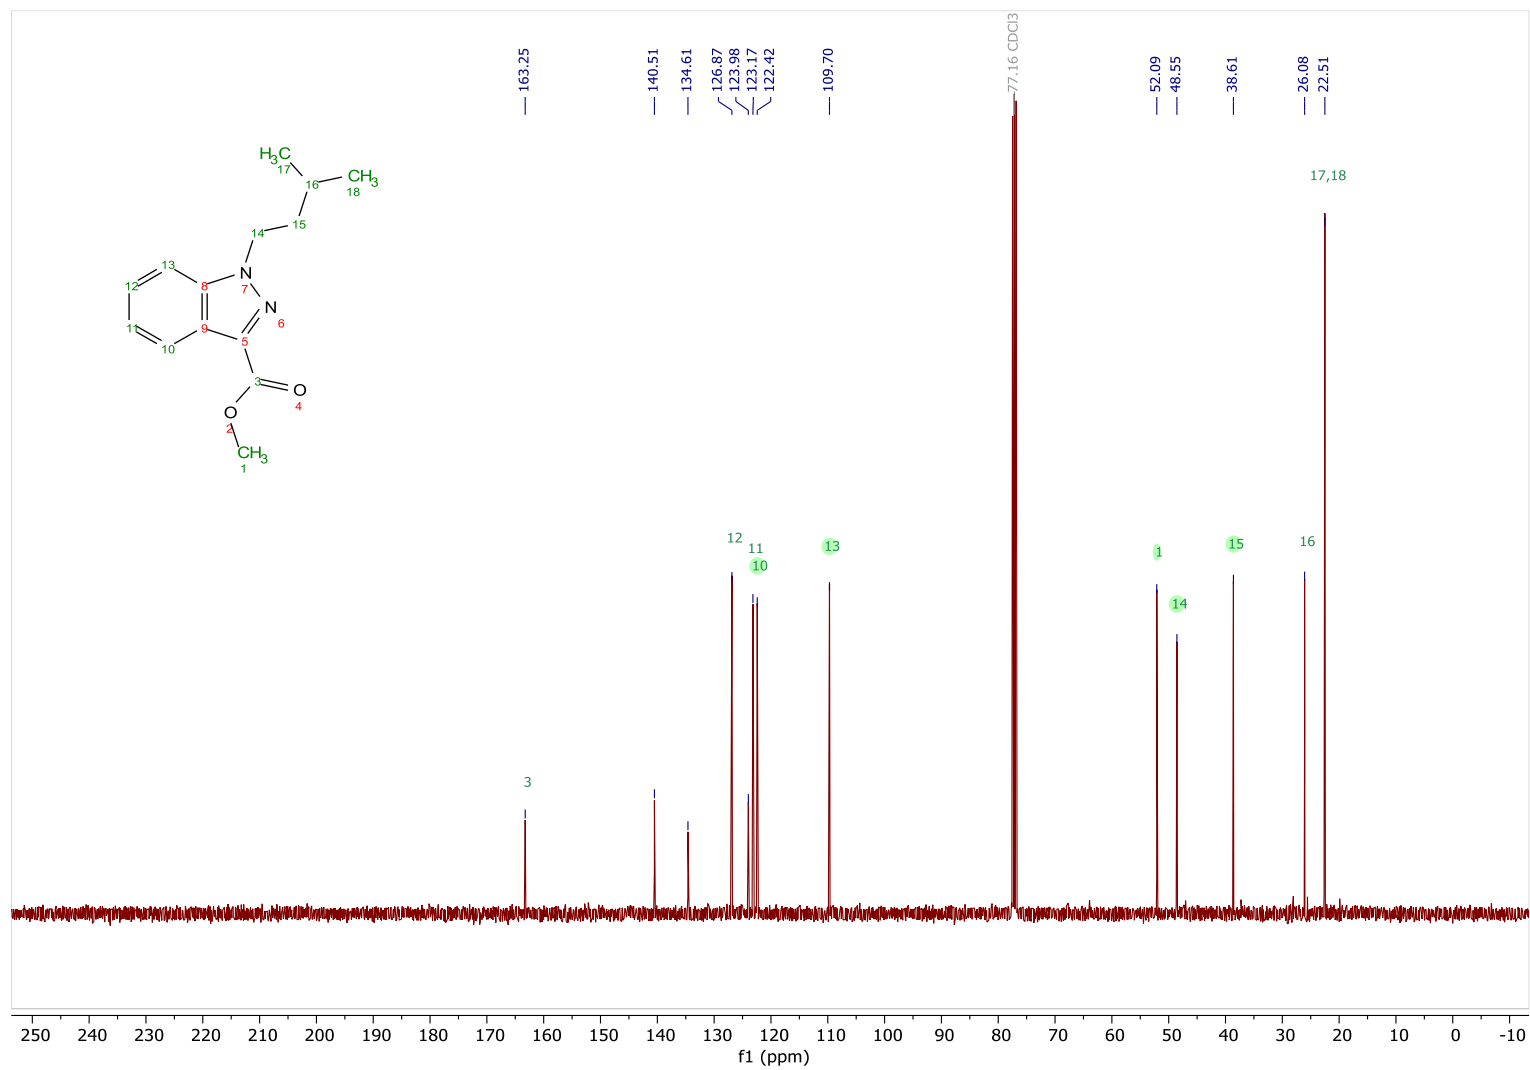

$^1\text{H}$ - $^1\text{H}$  COSY (400 MHz,  $\text{CDCl}_3$ )

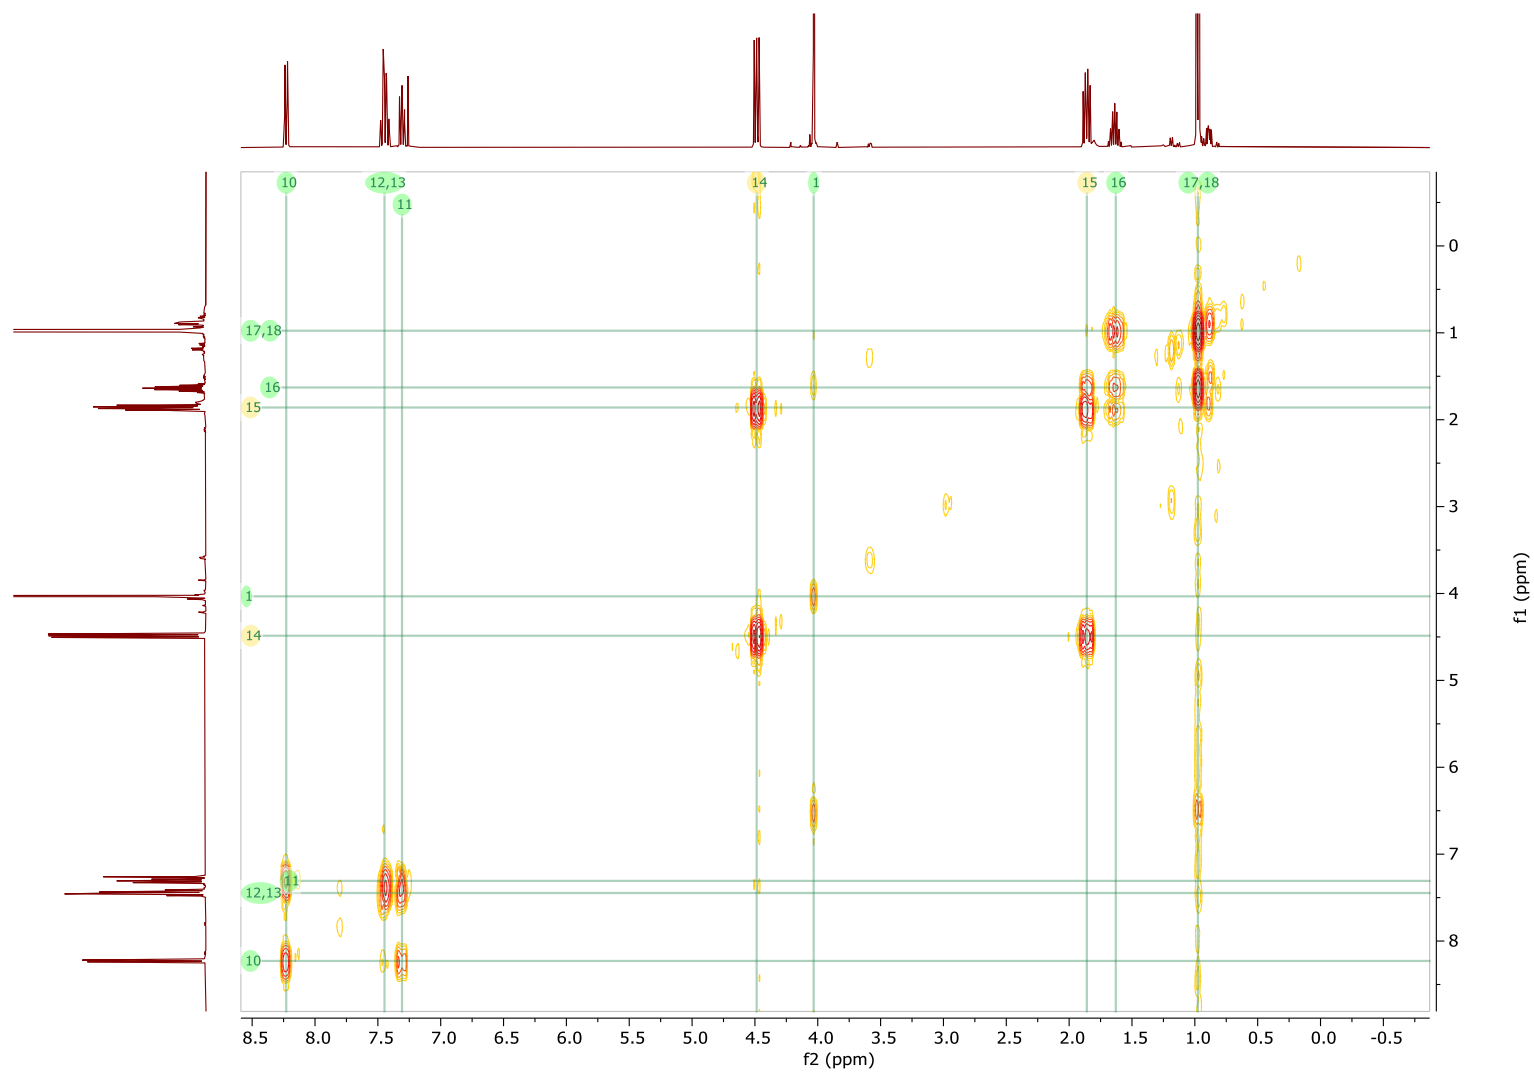

$^1\text{H}$ - $^{13}\text{C}$  HSQC ( $\text{CDCl}_3$ )

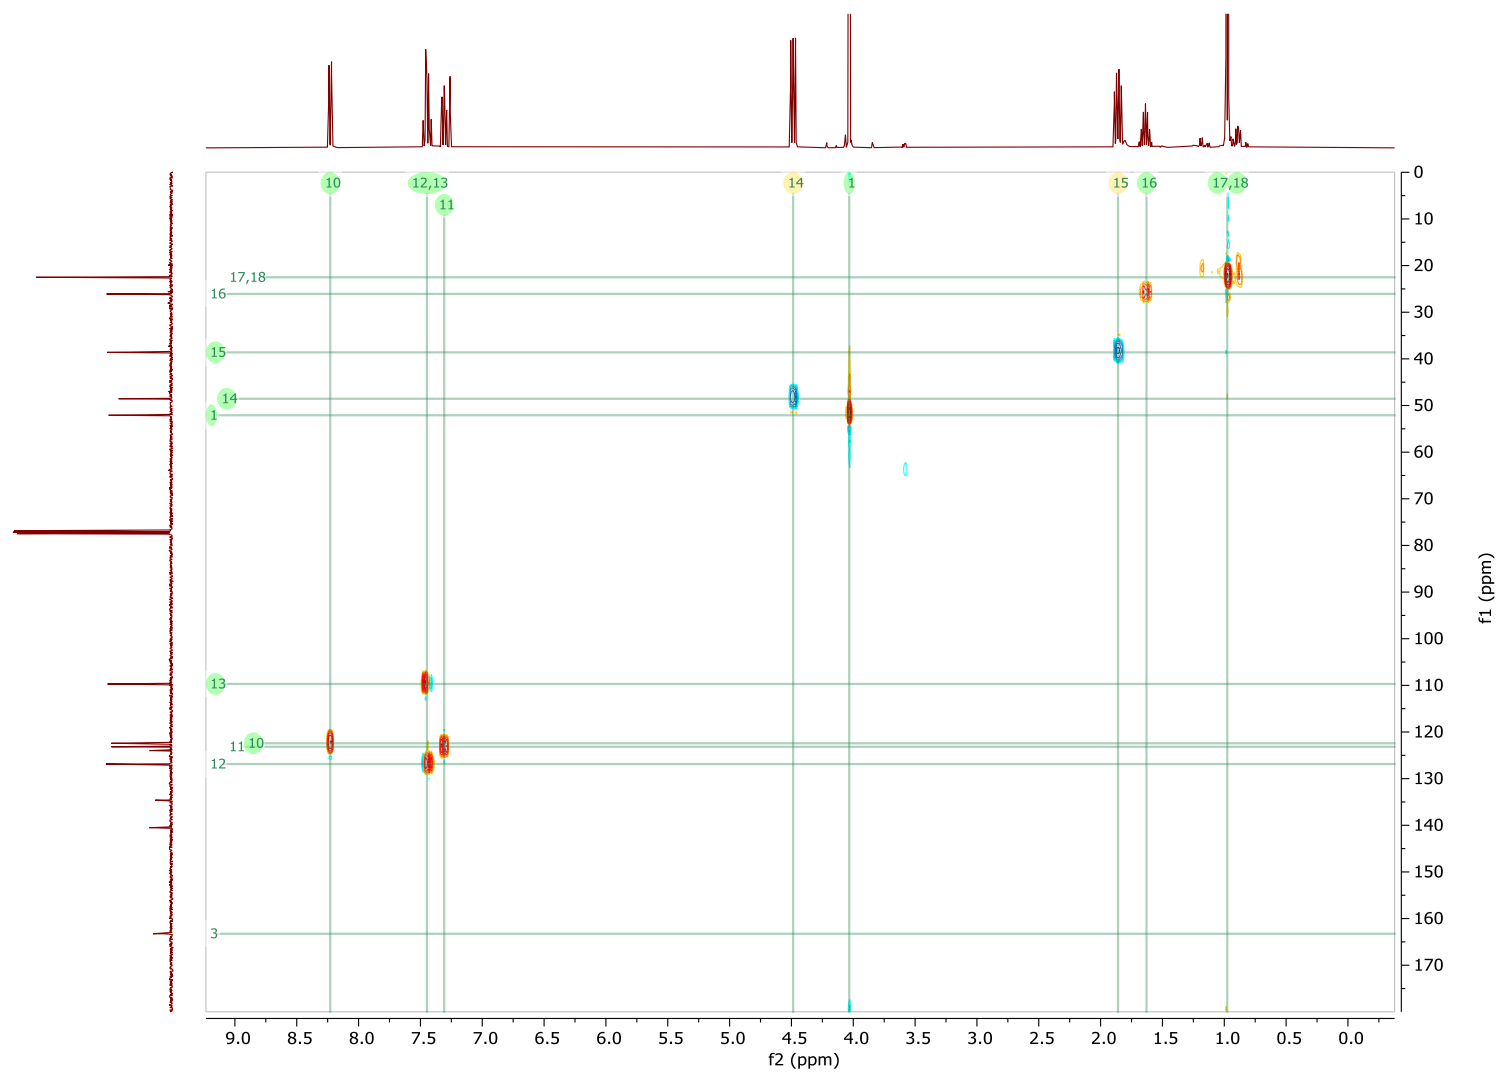

$^1\text{H}$ - $^{13}\text{C}$  HMBC ( $\text{CDCl}_3$ )

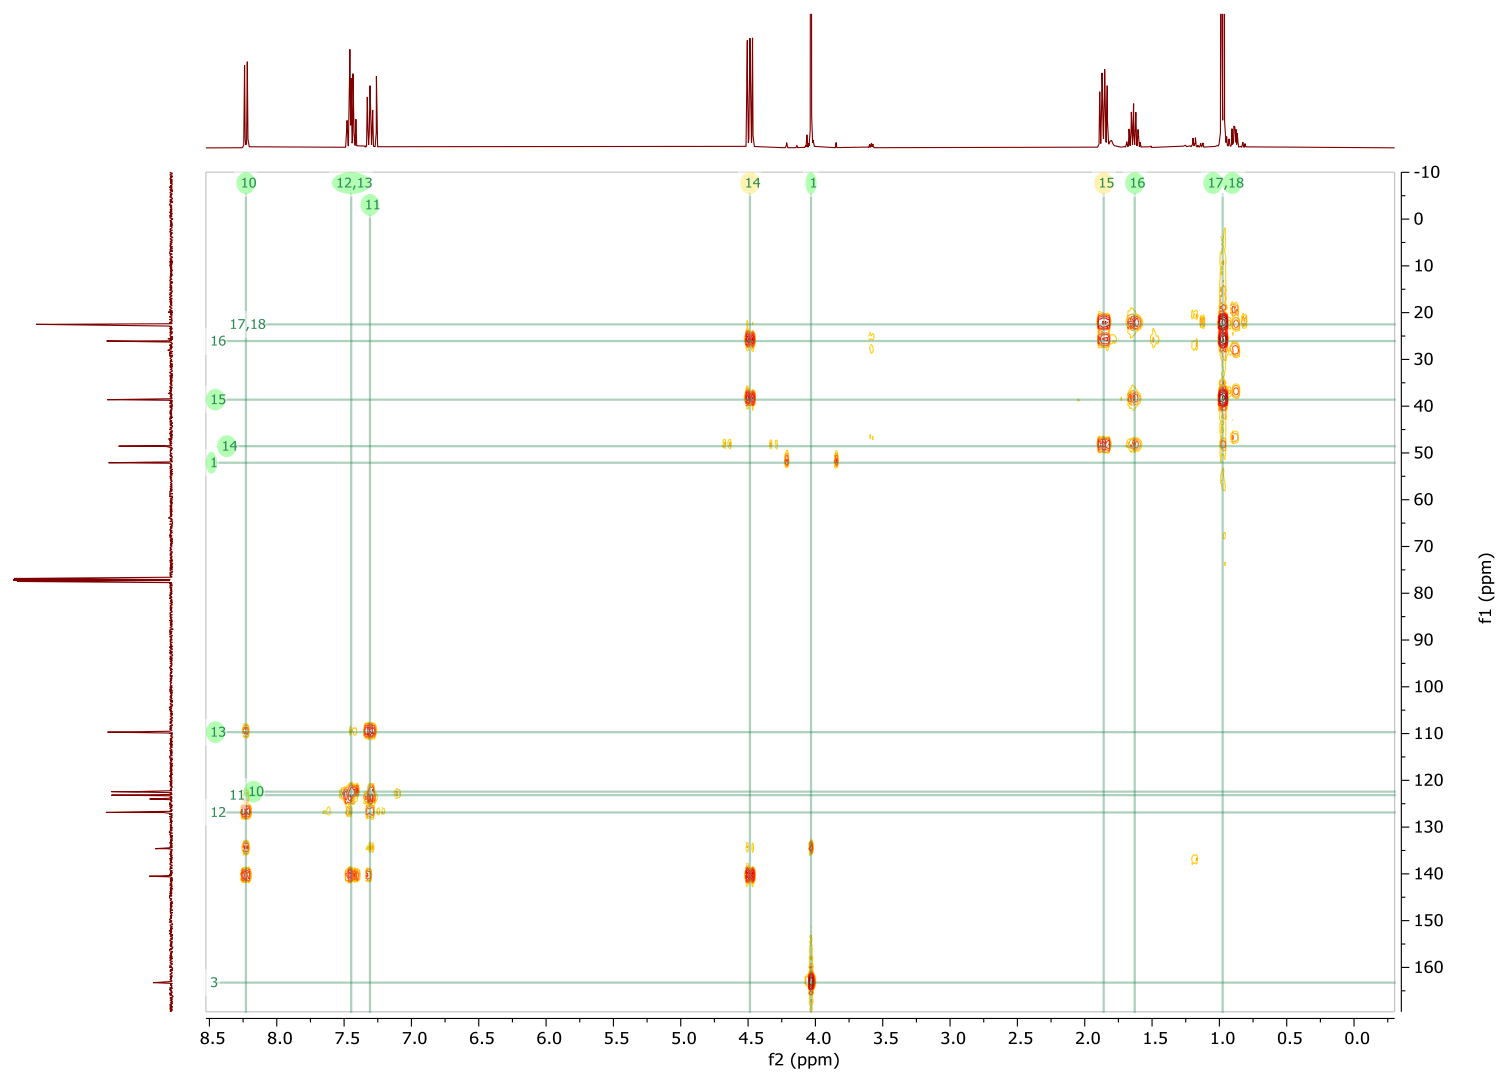

$^1\text{H}$ - $^1\text{H}$  NOESY (400 MHz,  $\text{CDCl}_3$ )

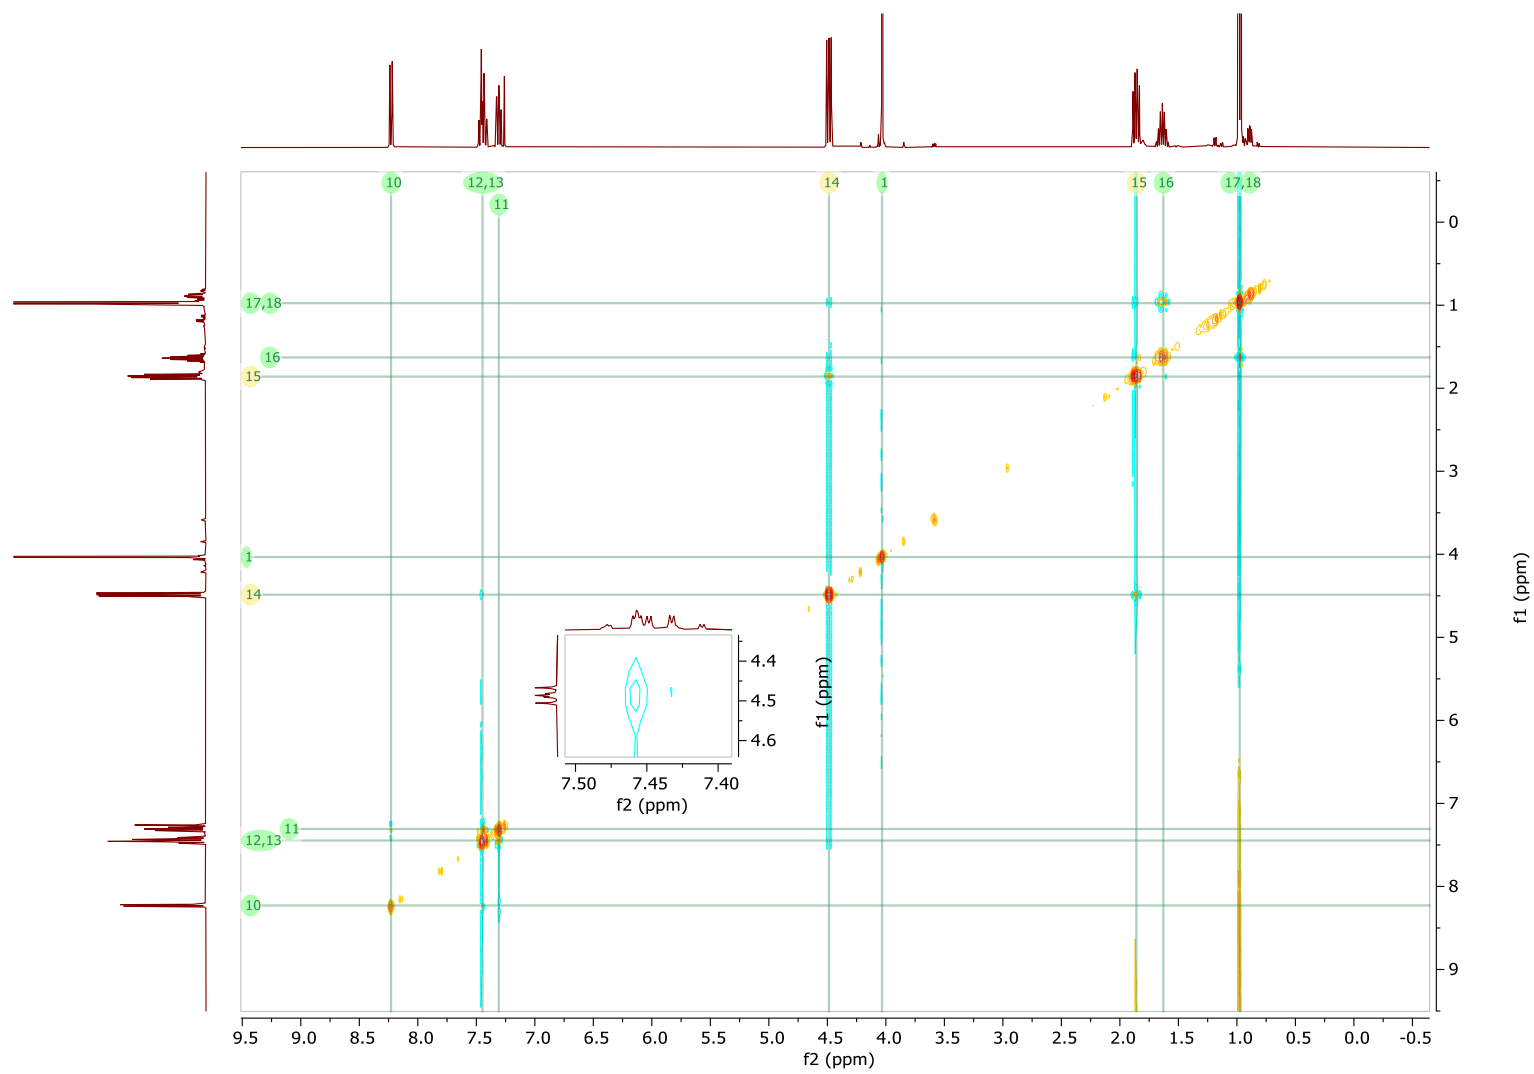

**Methyl 5-bromo-1-(2-phenylethyl)-1H-indazole-6-carboxylate (2t)**

**<sup>1</sup>H NMR (400 MHz, DMSO-*d*<sub>6</sub>)**

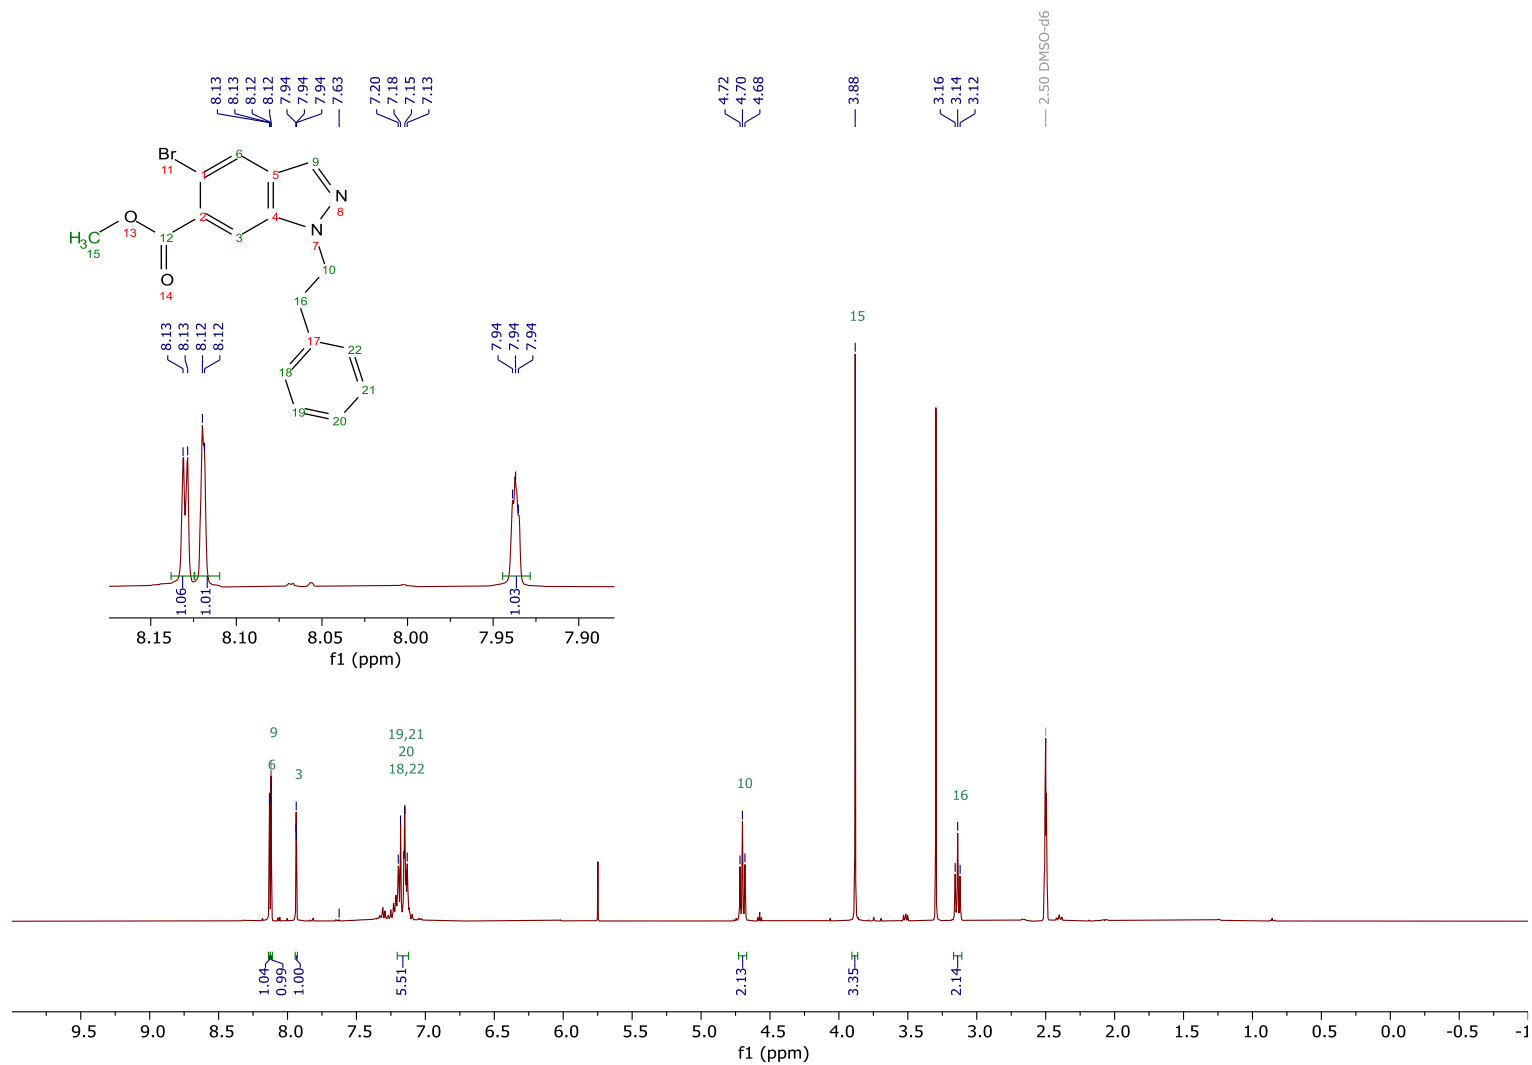

**$^{13}\text{C}$  NMR (101 MHz, DMSO- $d_6$ )**

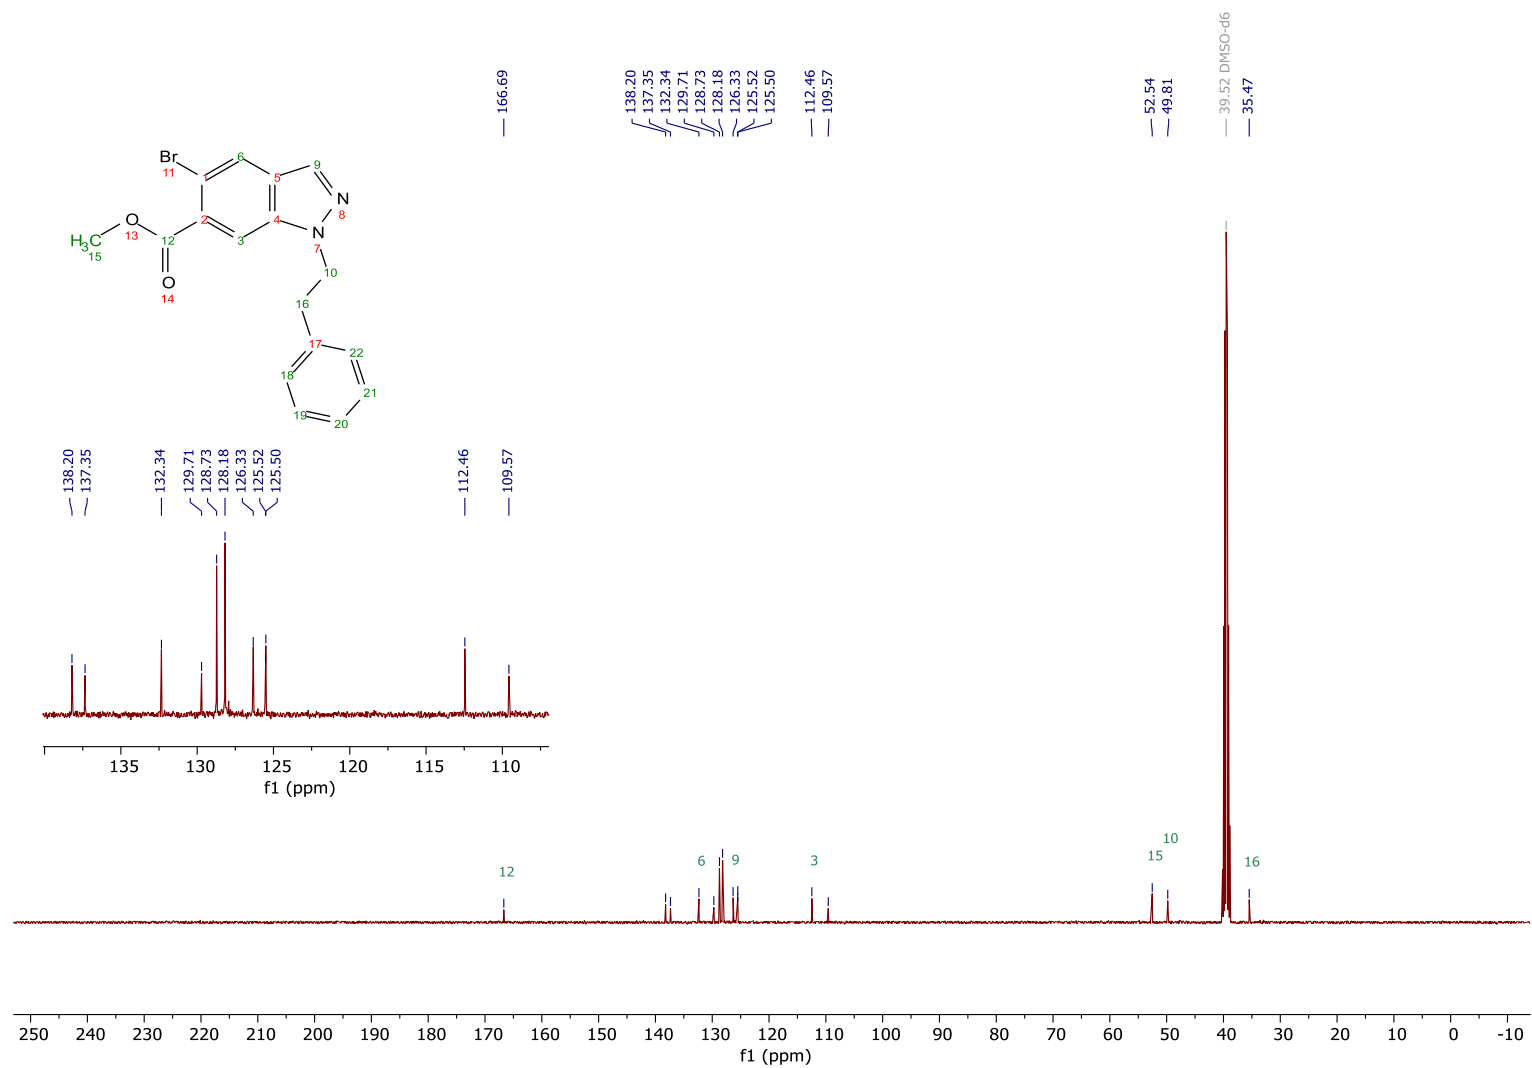

<sup>1</sup>H-<sup>13</sup>C HSQC (DMSO-*d*<sub>6</sub>)

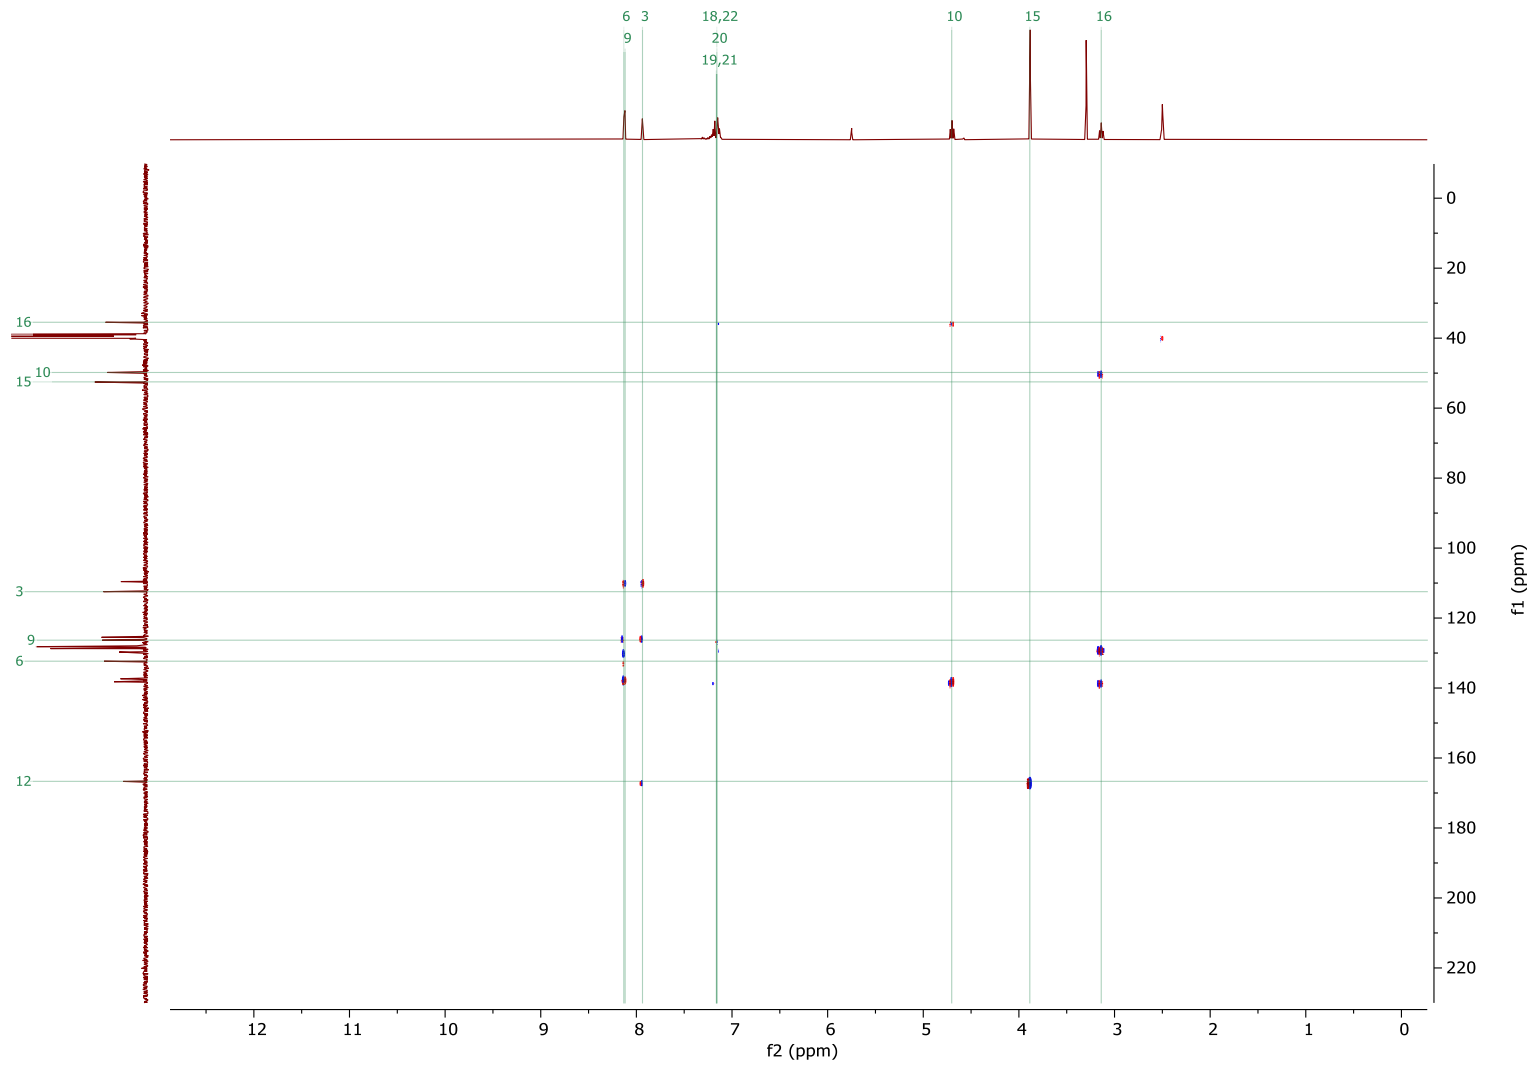

$^1\text{H}$ - $^{13}\text{C}$  HMBC (DMSO- $d_6$ )

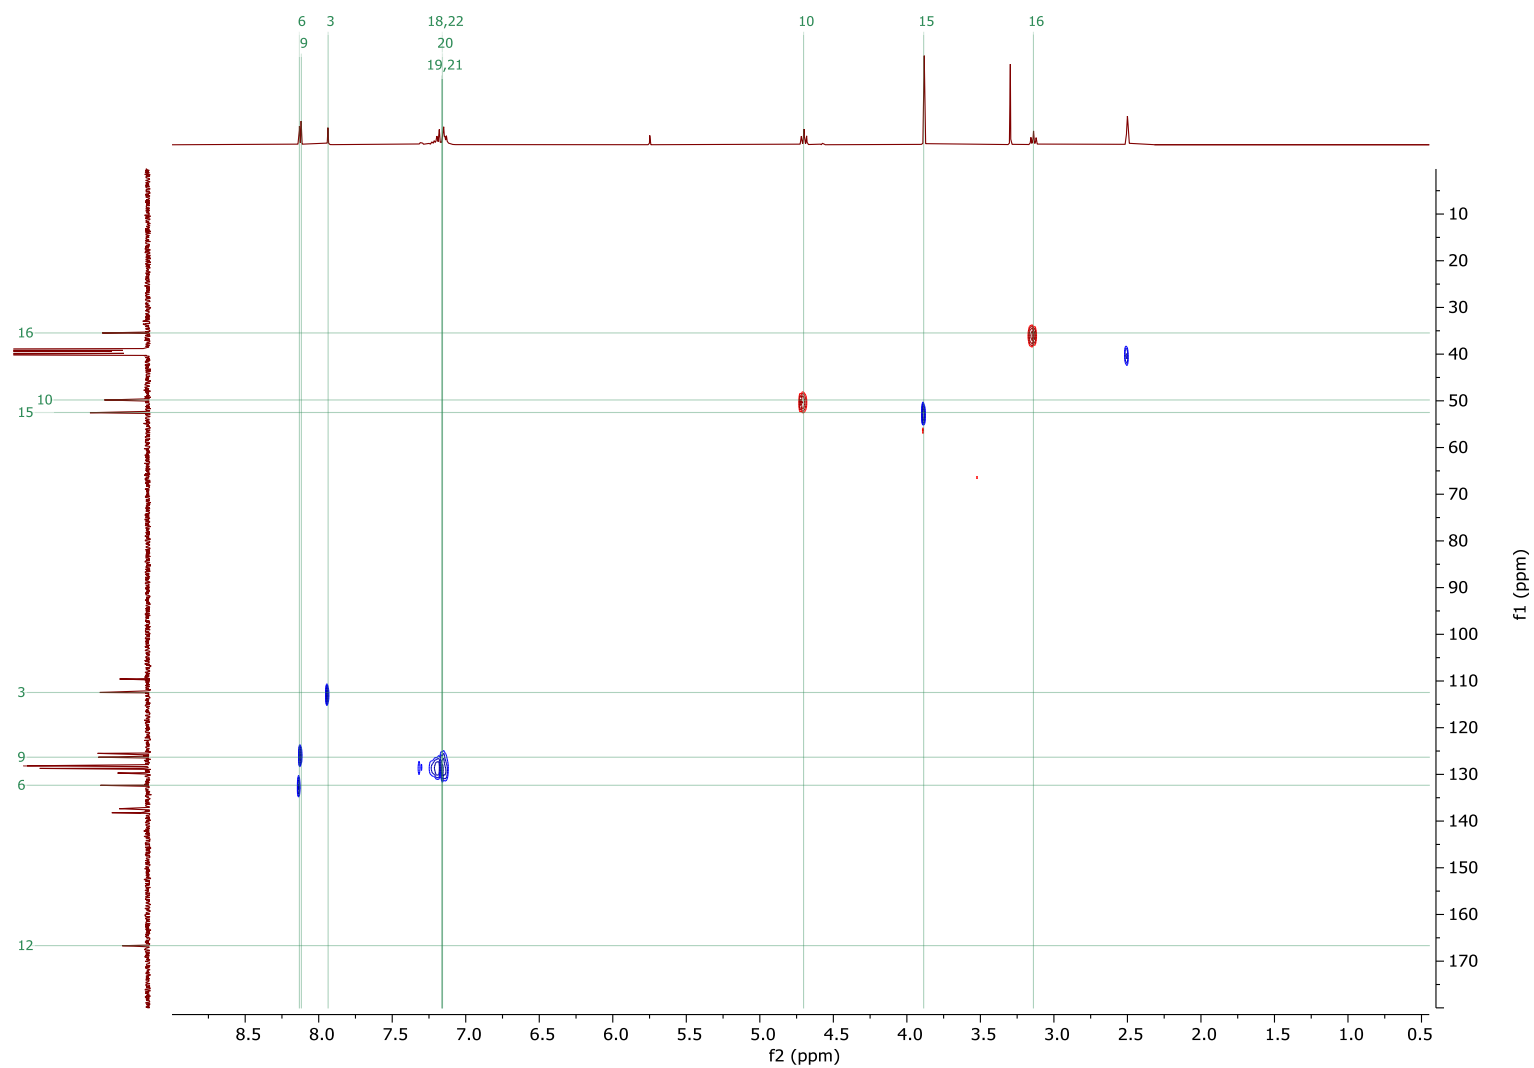

$^1\text{H}$ - $^1\text{H}$  NOESY (400 MHz, DMSO- $d_6$ )

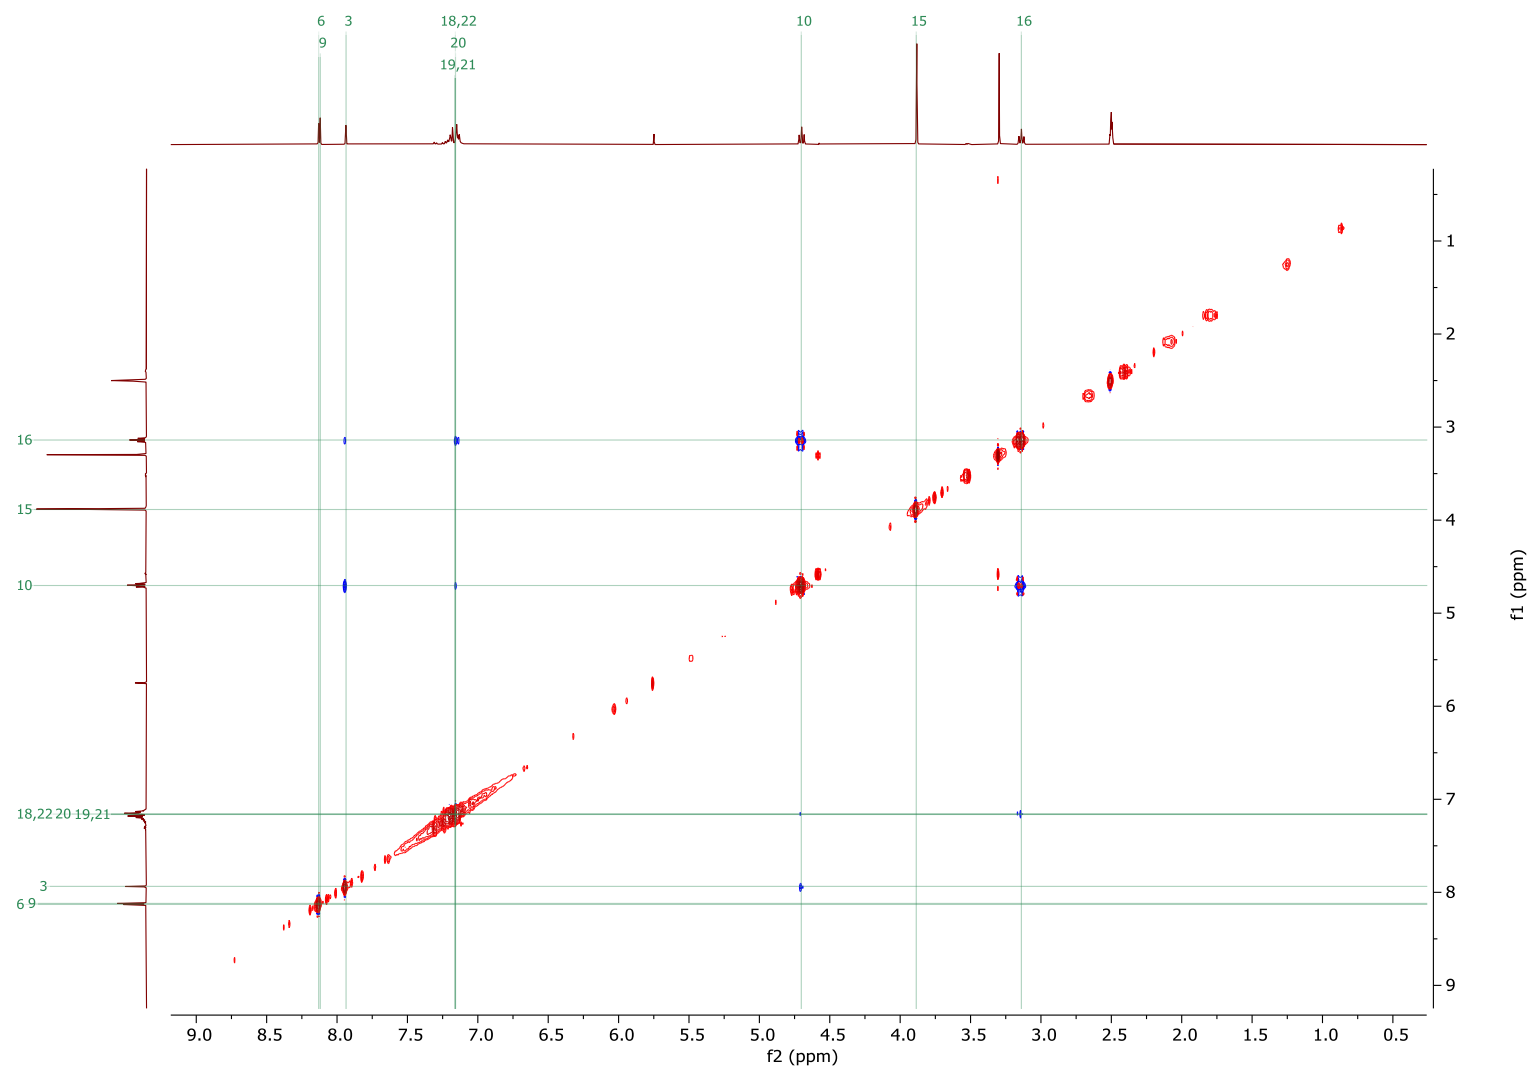

**1-cyclopentyl-1*H*-indazole (2u)**

<sup>1</sup>H NMR (400 MHz, DMSO-*d*<sub>6</sub>)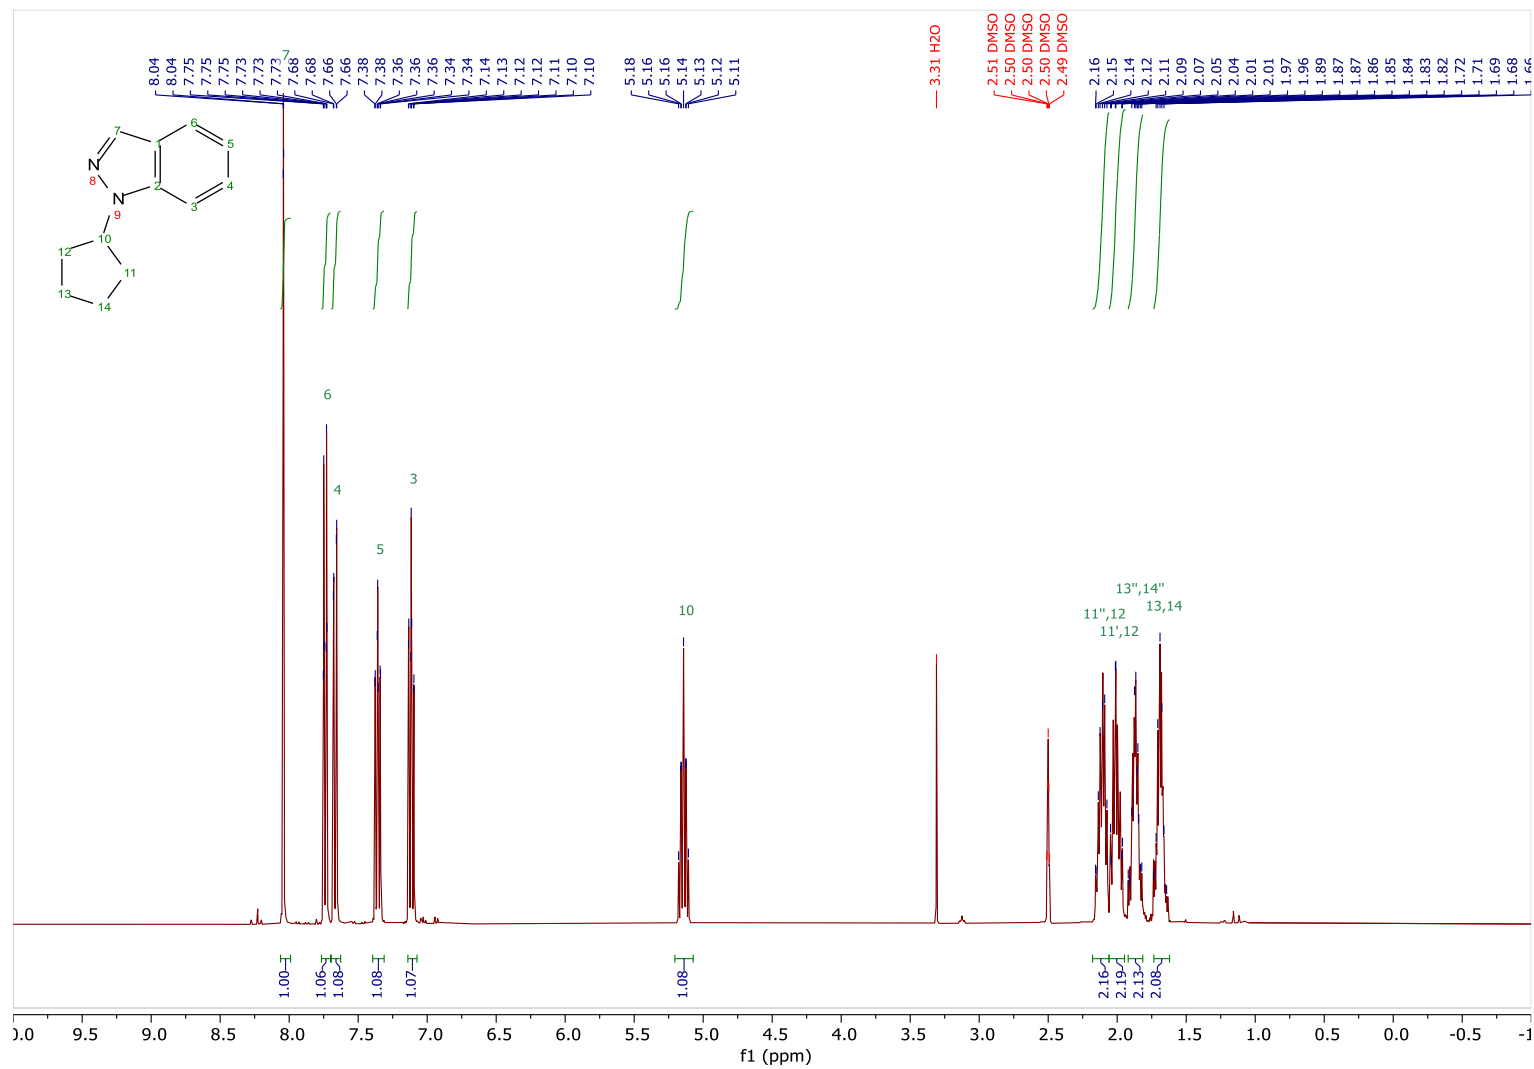

**$^{13}\text{C}$  NMR (101 MHz, DMSO- $d_6$ )**

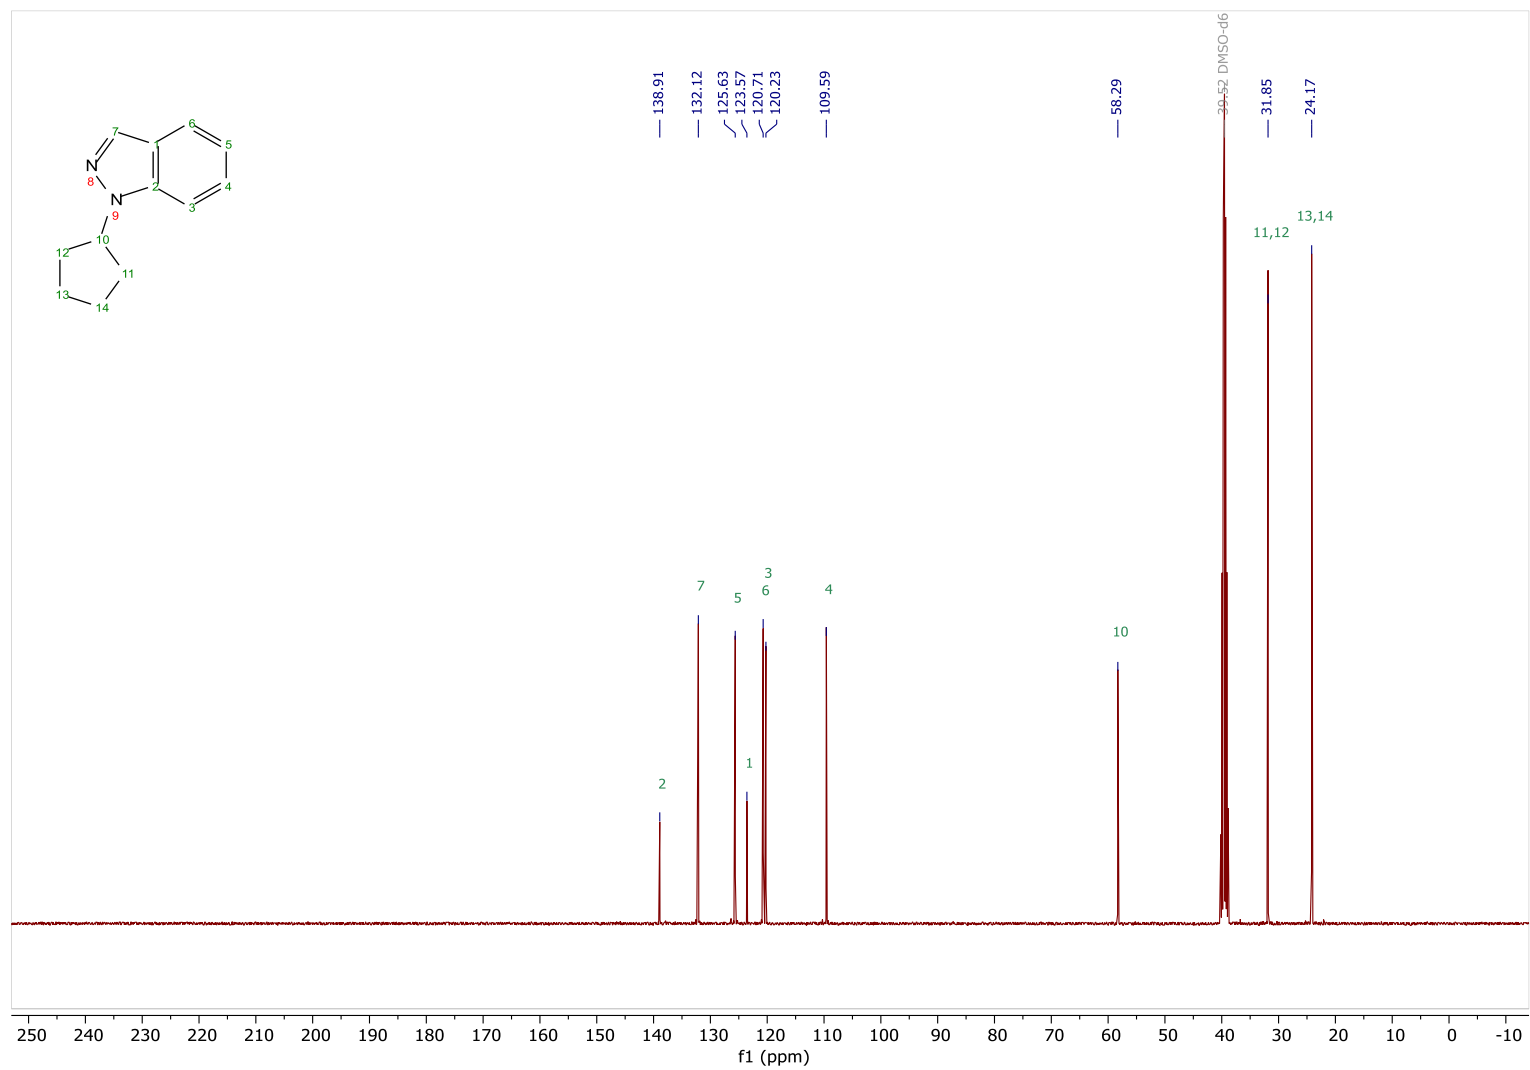

$^1\text{H}$ - $^1\text{H}$  COSY (400 MHz, DMSO- $d_6$ )

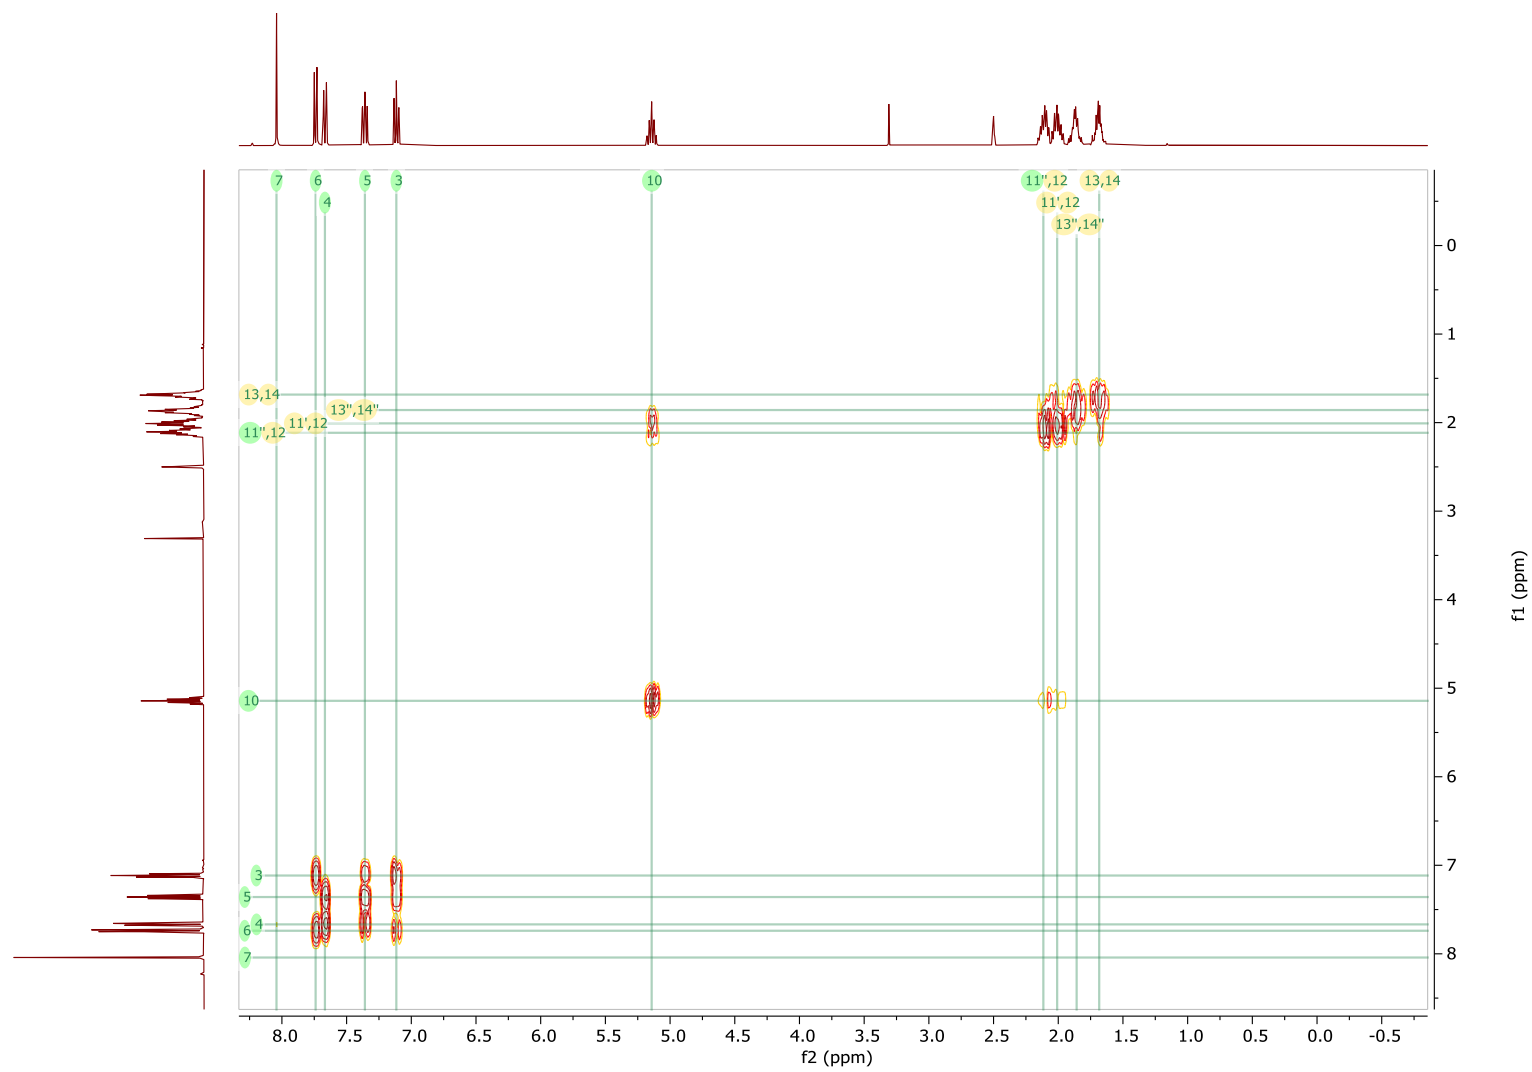

$^1\text{H}$ - $^{13}\text{C}$  HSQC (DMSO- $d_6$ )

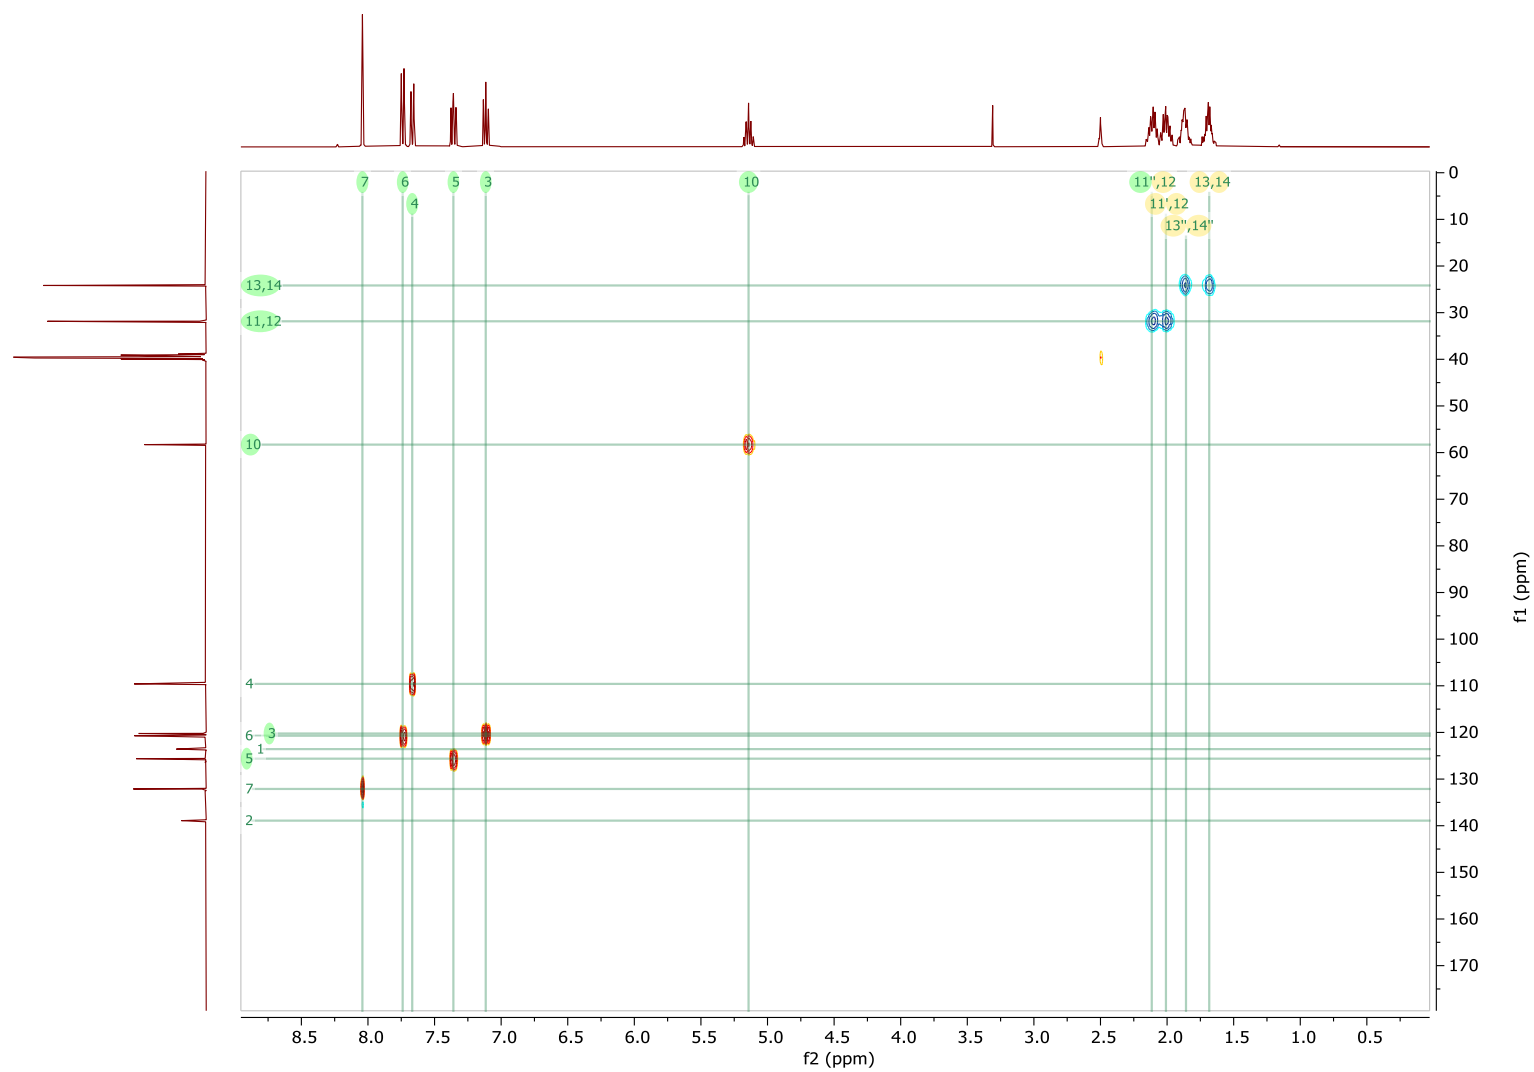

$^1\text{H}$ - $^{13}\text{C}$  HMBC (DMSO- $d_6$ )

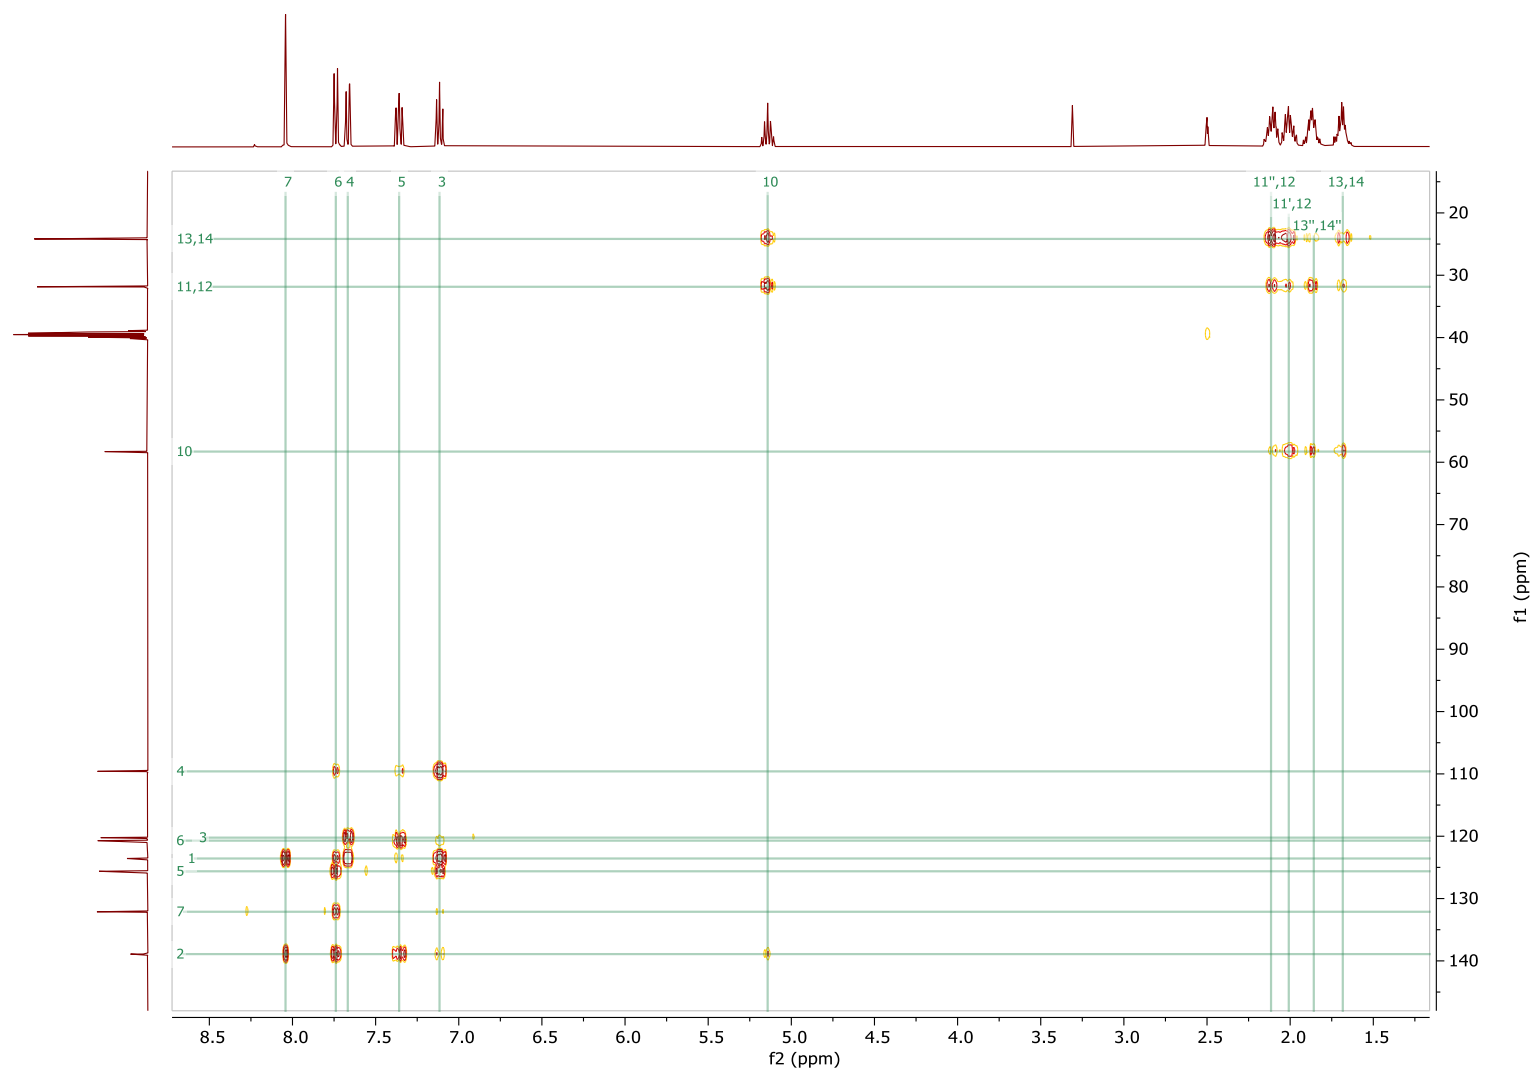

$^1\text{H}$ - $^1\text{H}$  NOESY (400 MHz, DMSO- $d_6$ )

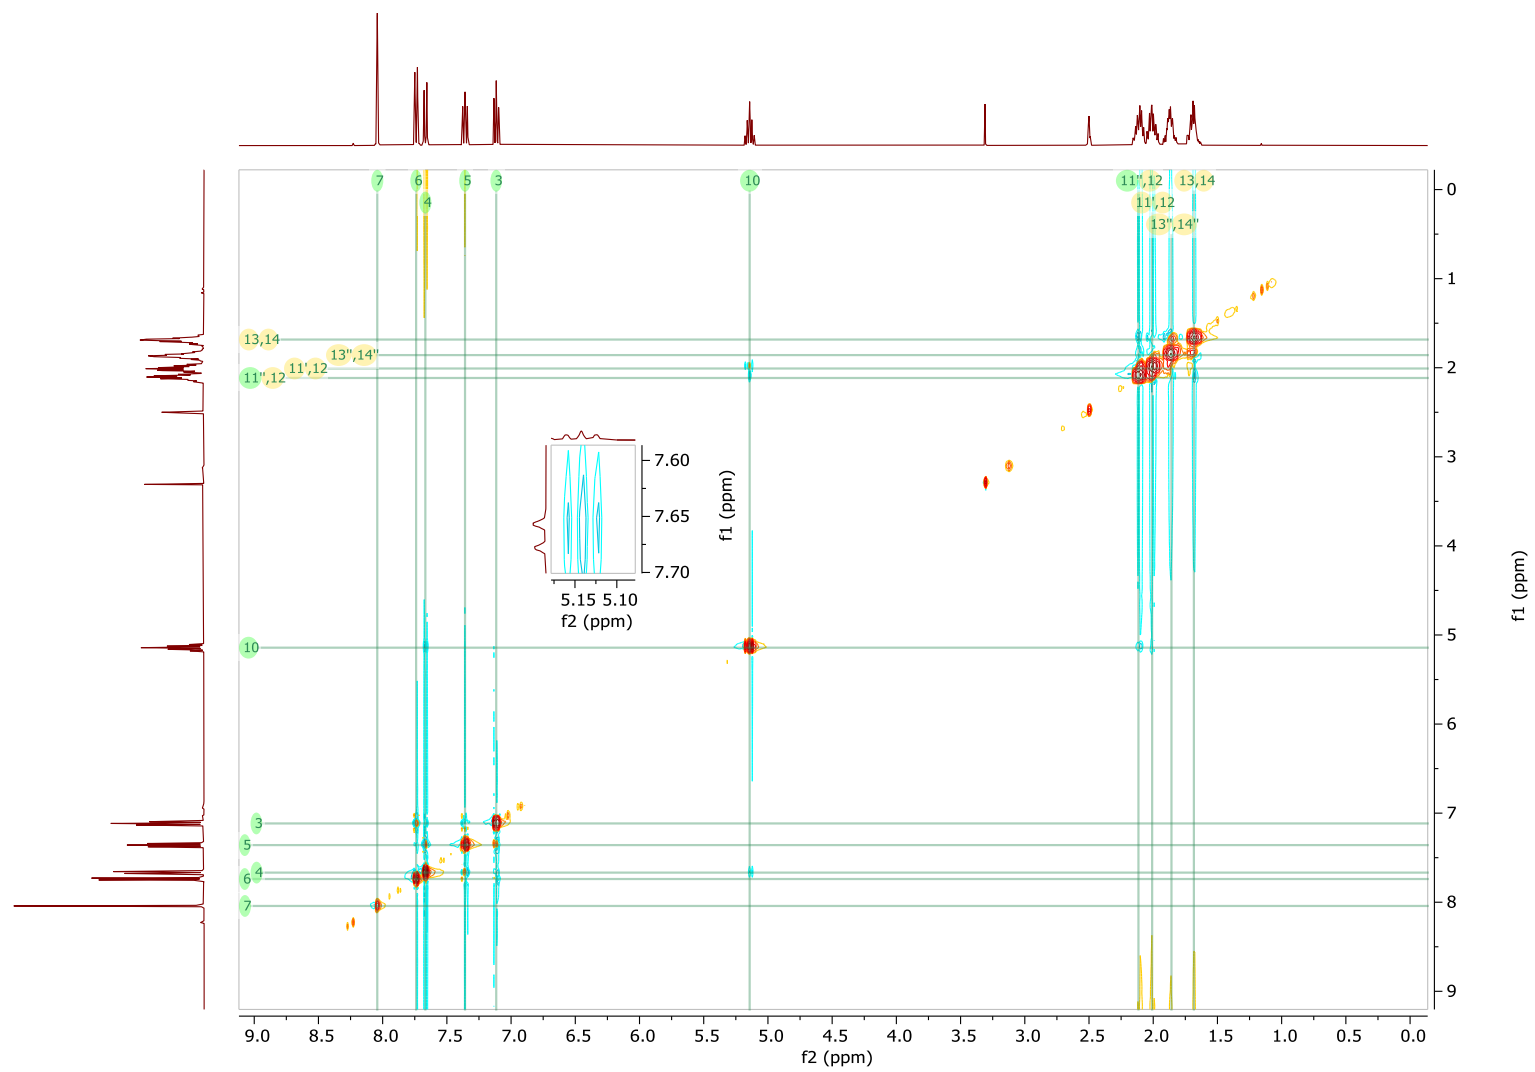

**Methyl 1-cyclohexyl-1*H*-indazole-3-carboxylate (2v)**

**<sup>1</sup>H NMR (400 MHz, CDCl<sub>3</sub>)**

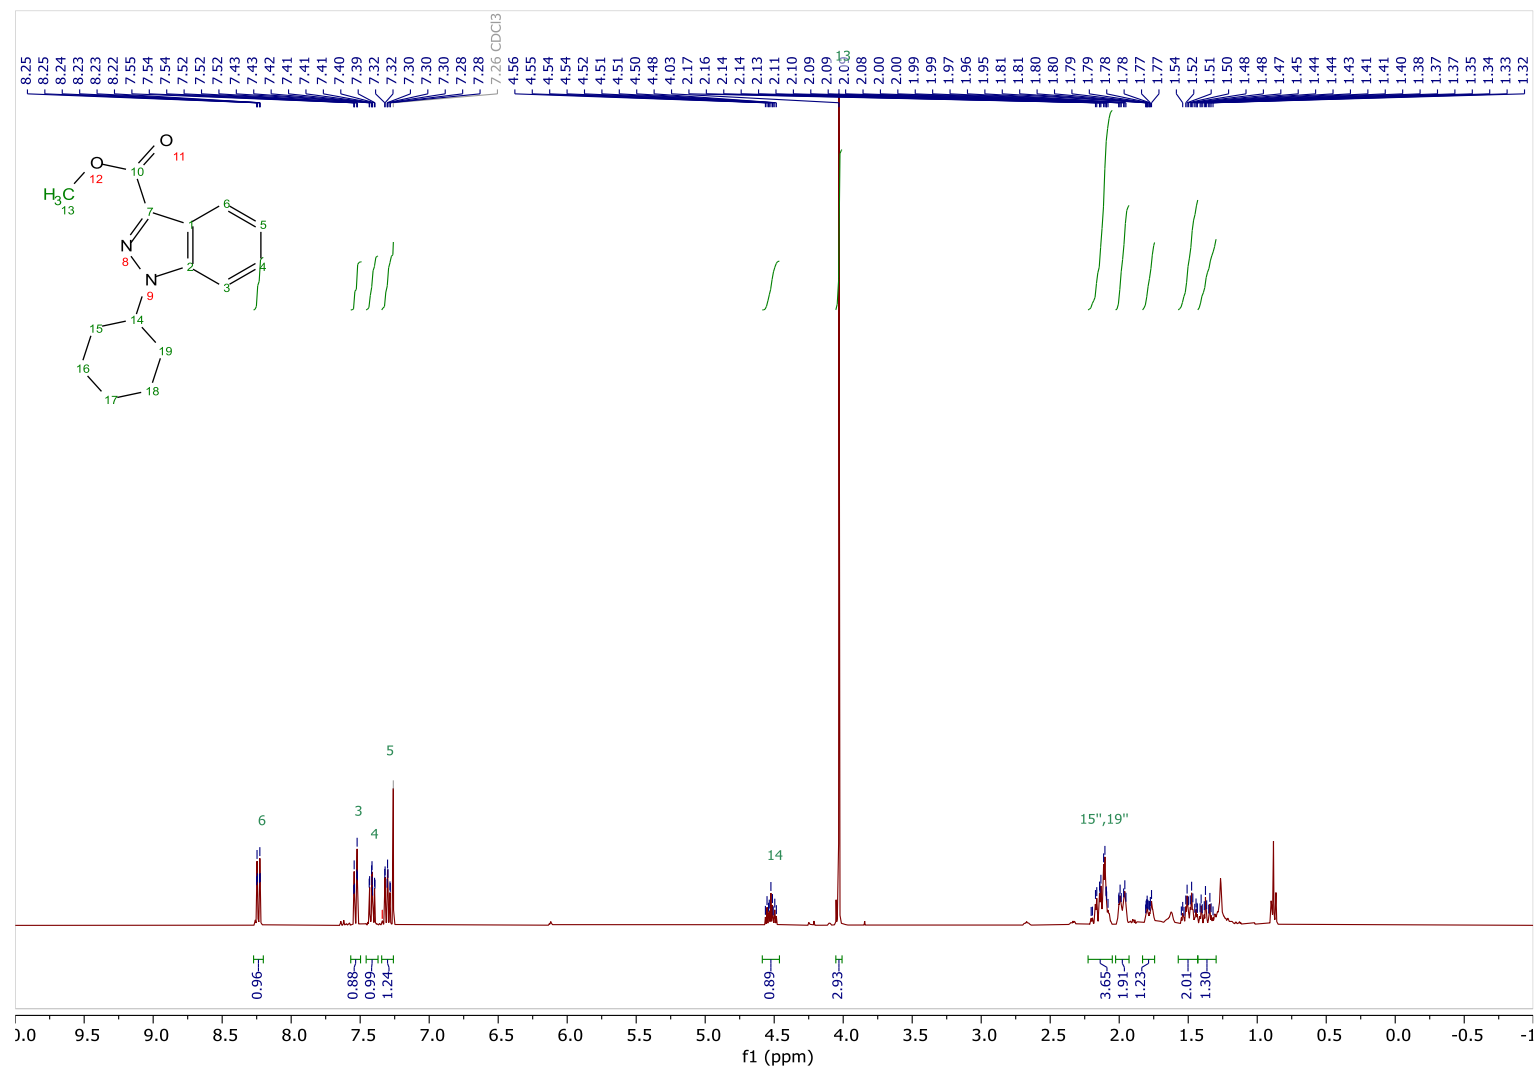

**$^{13}\text{C}$  NMR (101 MHz,  $\text{CDCl}_3$ )**

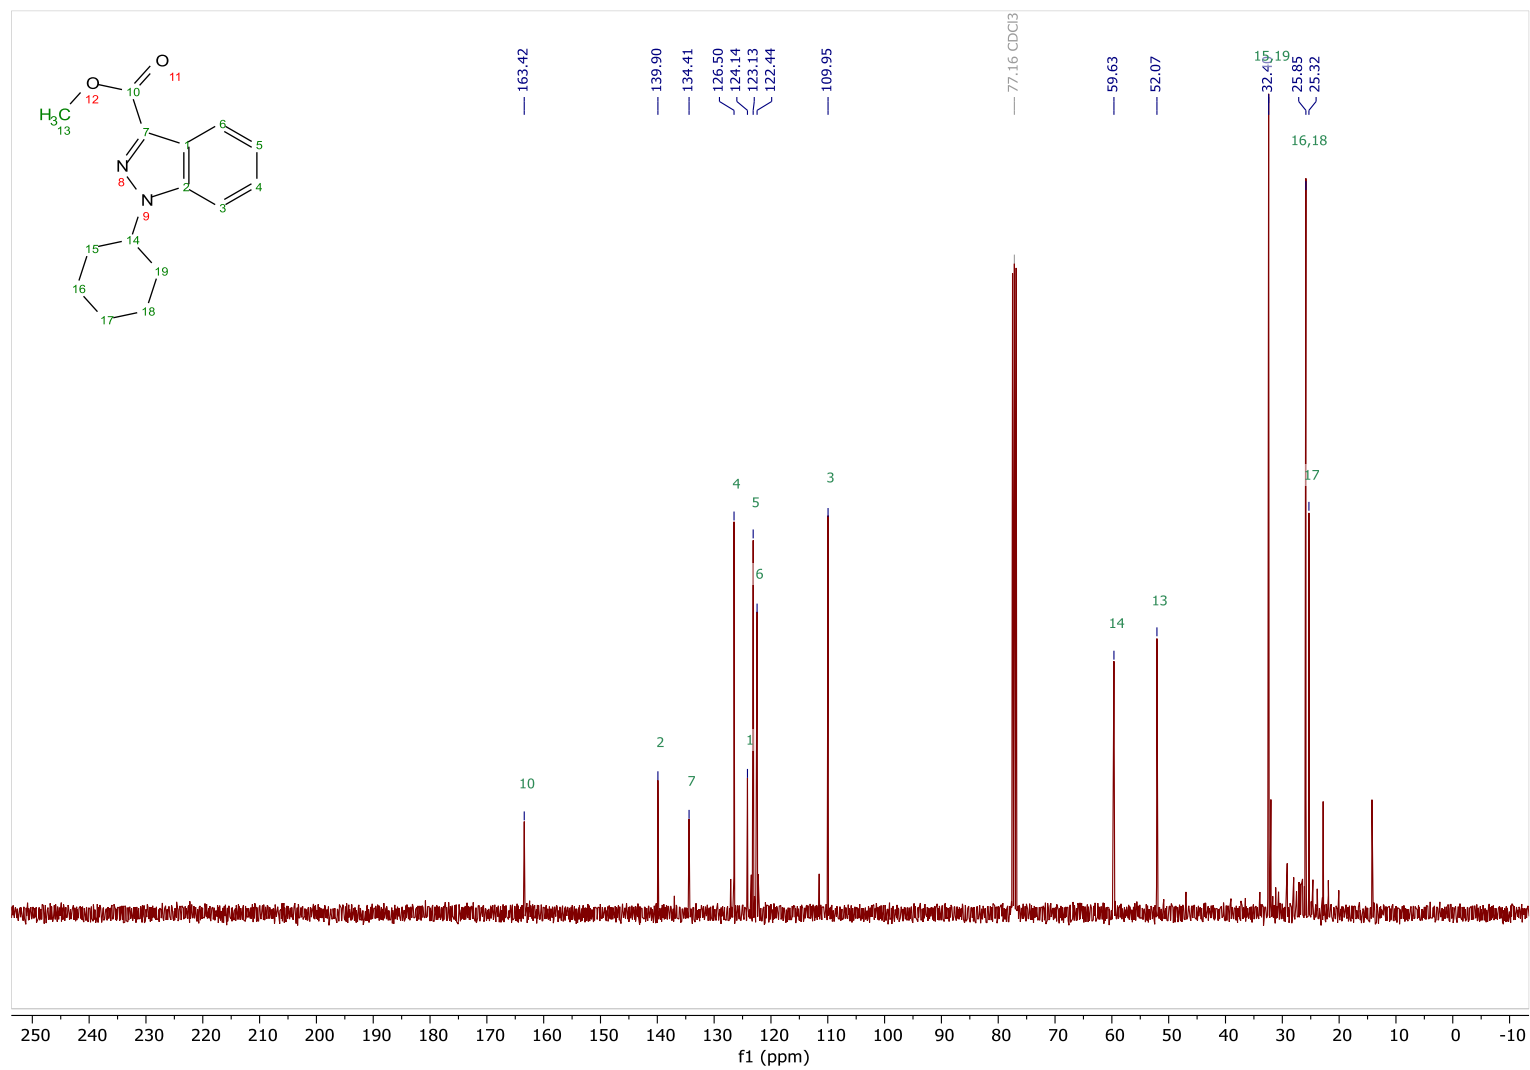

$^1\text{H}$ - $^1\text{H}$  COSY (400 MHz,  $\text{CDCl}_3$ )

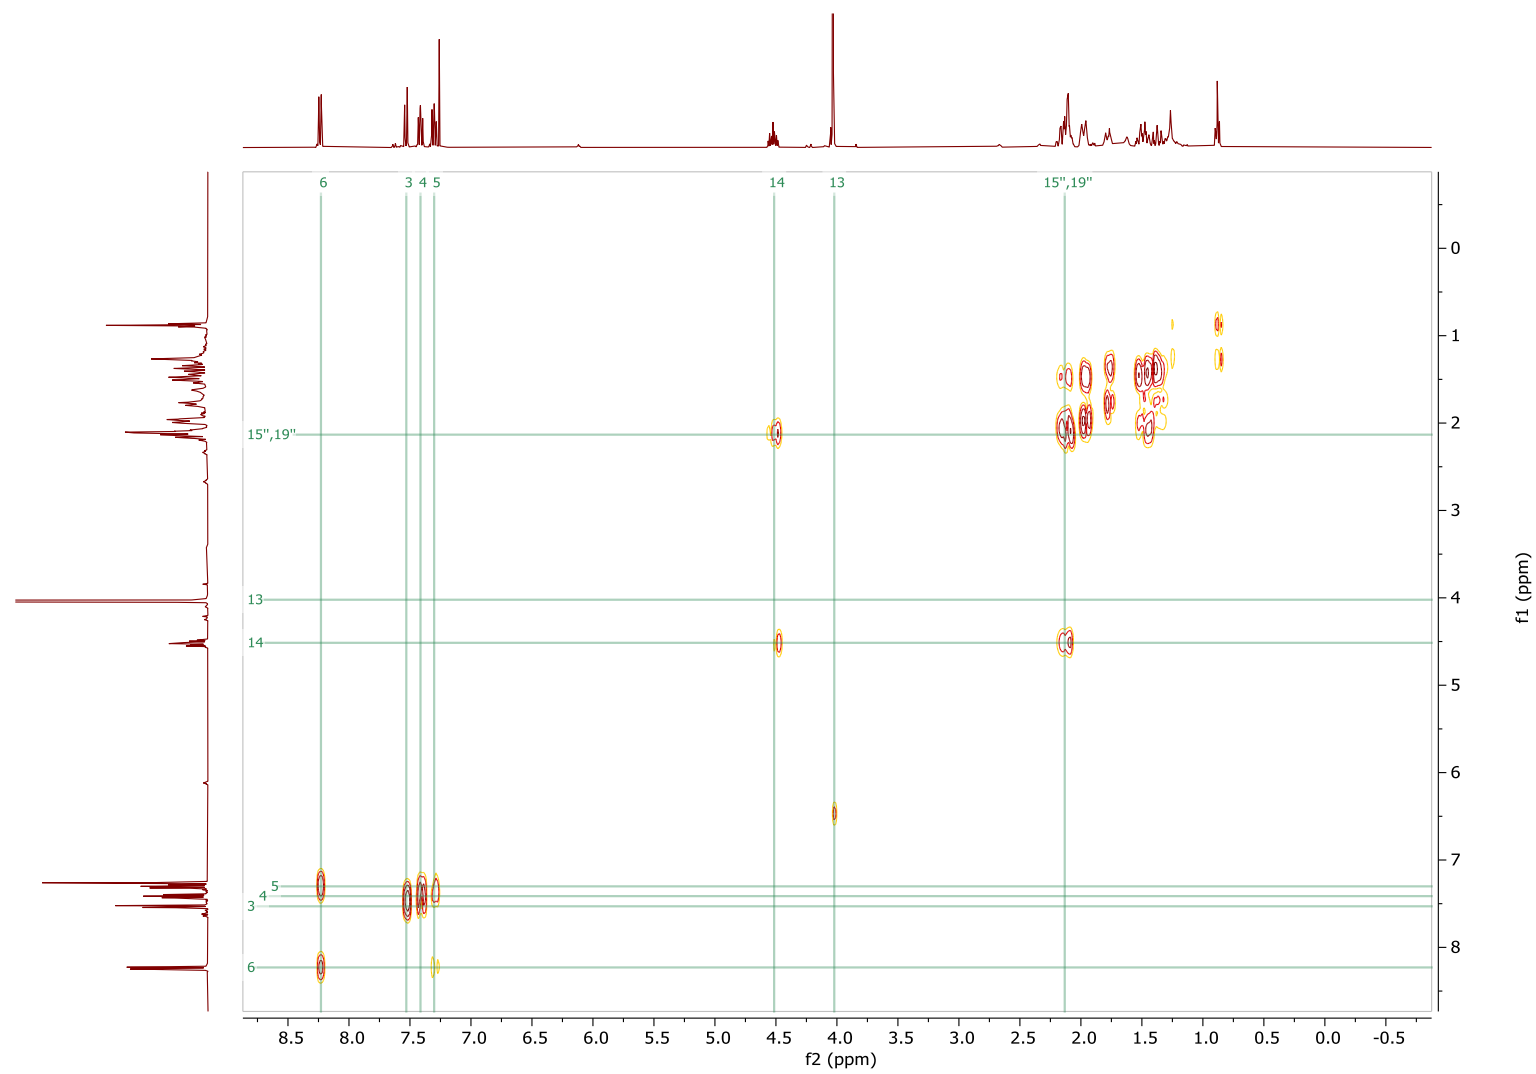

$^1\text{H}$ - $^{13}\text{C}$  HSQC ( $\text{CDCl}_3$ )

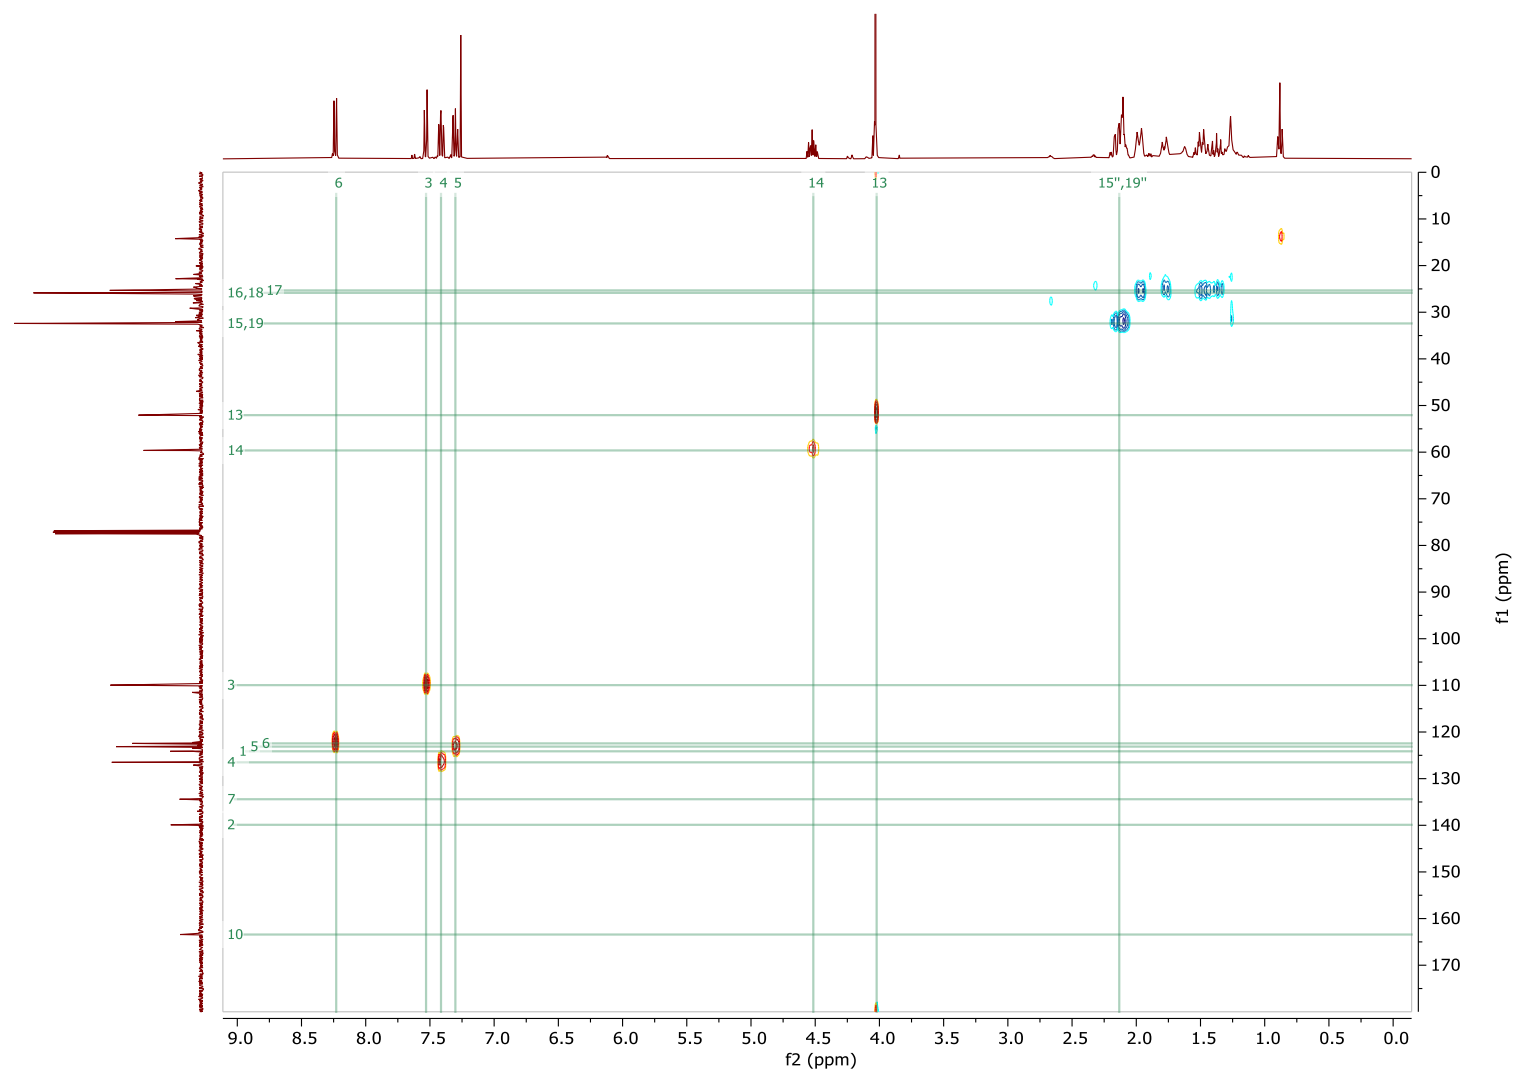

$^1\text{H}$ - $^{13}\text{C}$  HMBC ( $\text{CDCl}_3$ )

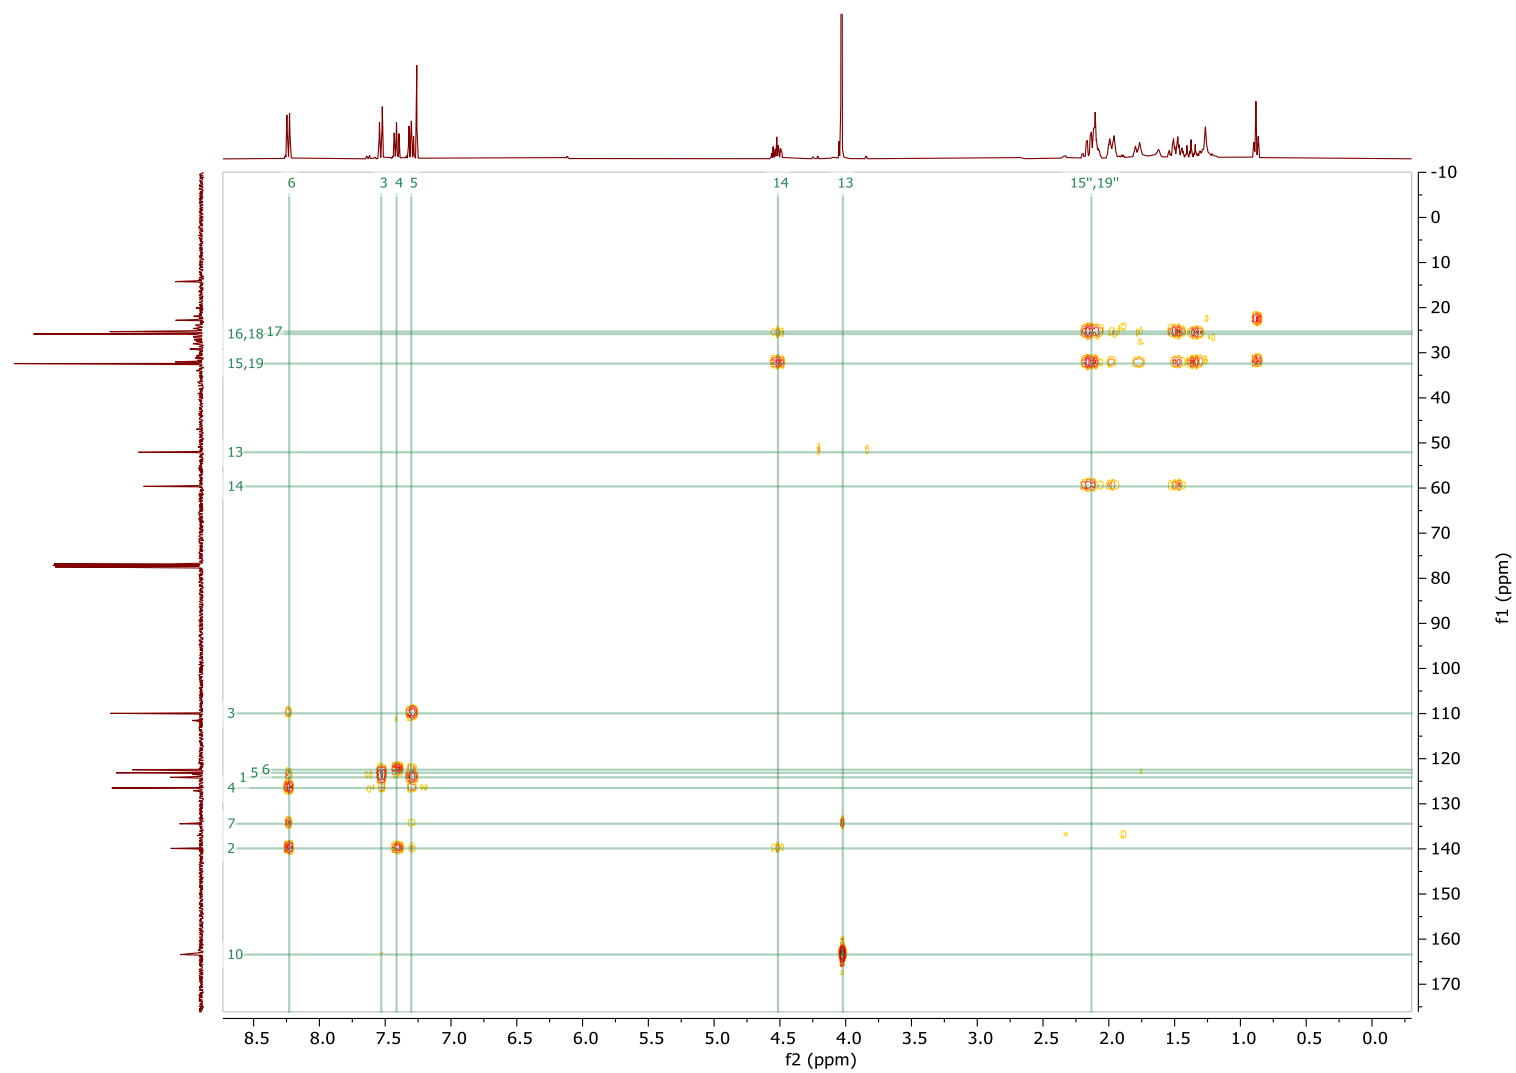

$^1\text{H}$ - $^1\text{H}$  NOESY (400 MHz,  $\text{CDCl}_3$ )

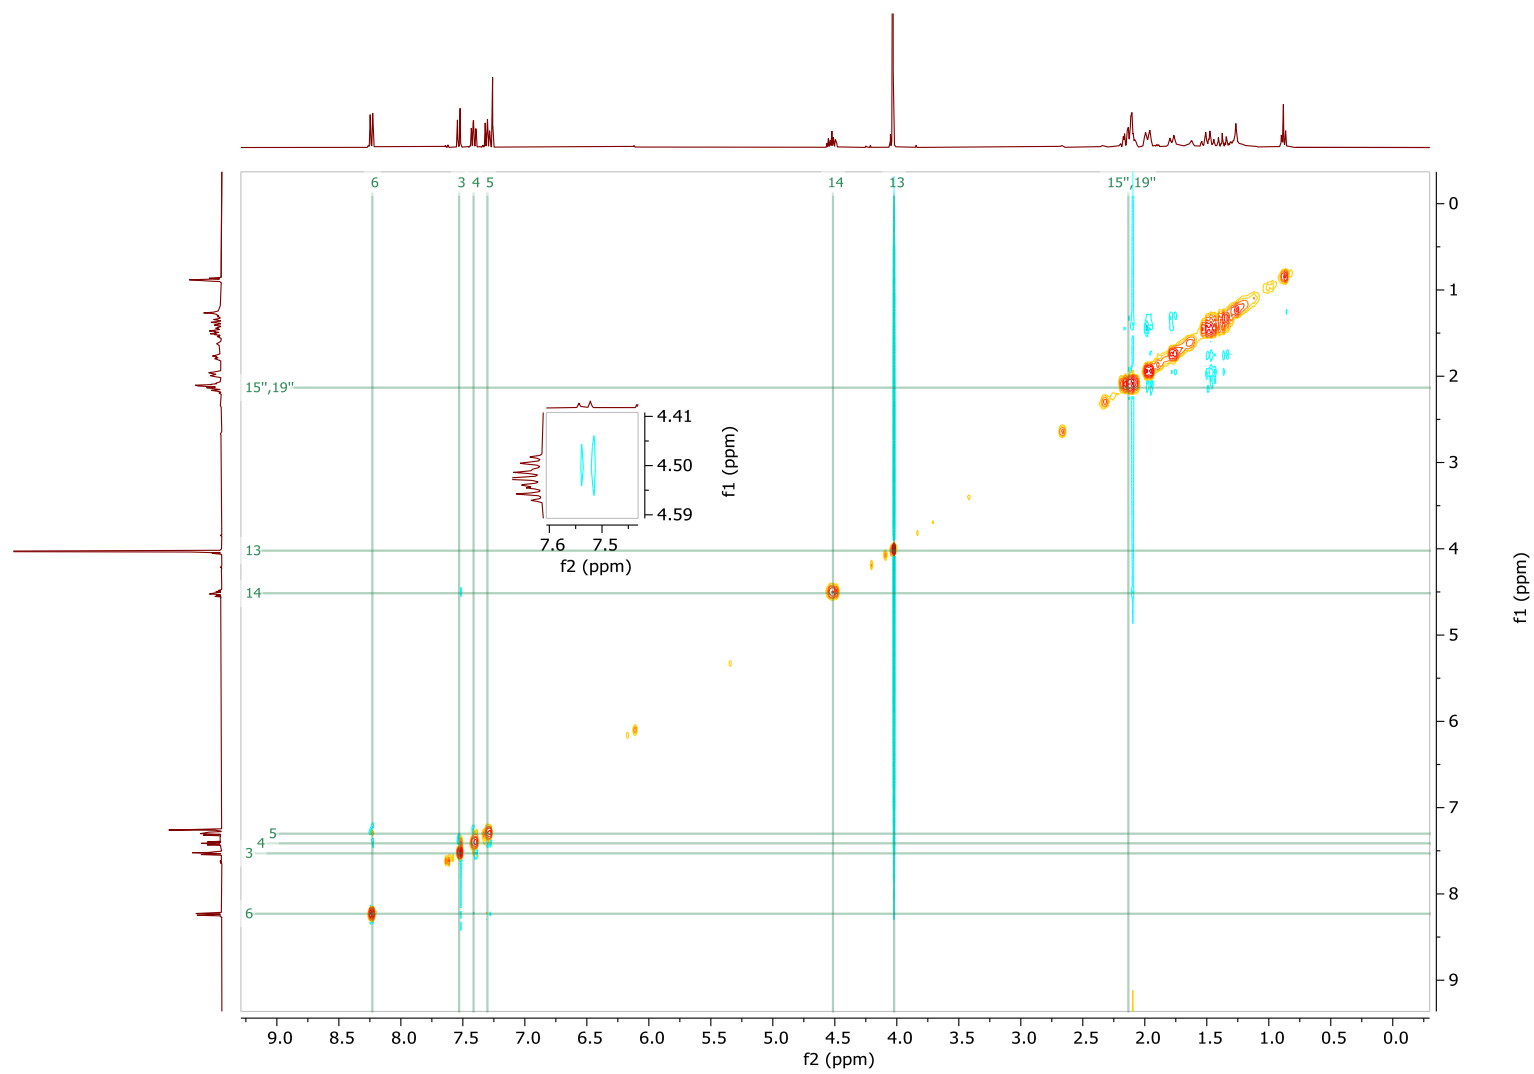

# Methyl 5-bromo-2-(2-methylallyl)-2H-indazole-6-carboxylate

<sup>1</sup>H NMR (400 MHz, CDCl<sub>3</sub>)

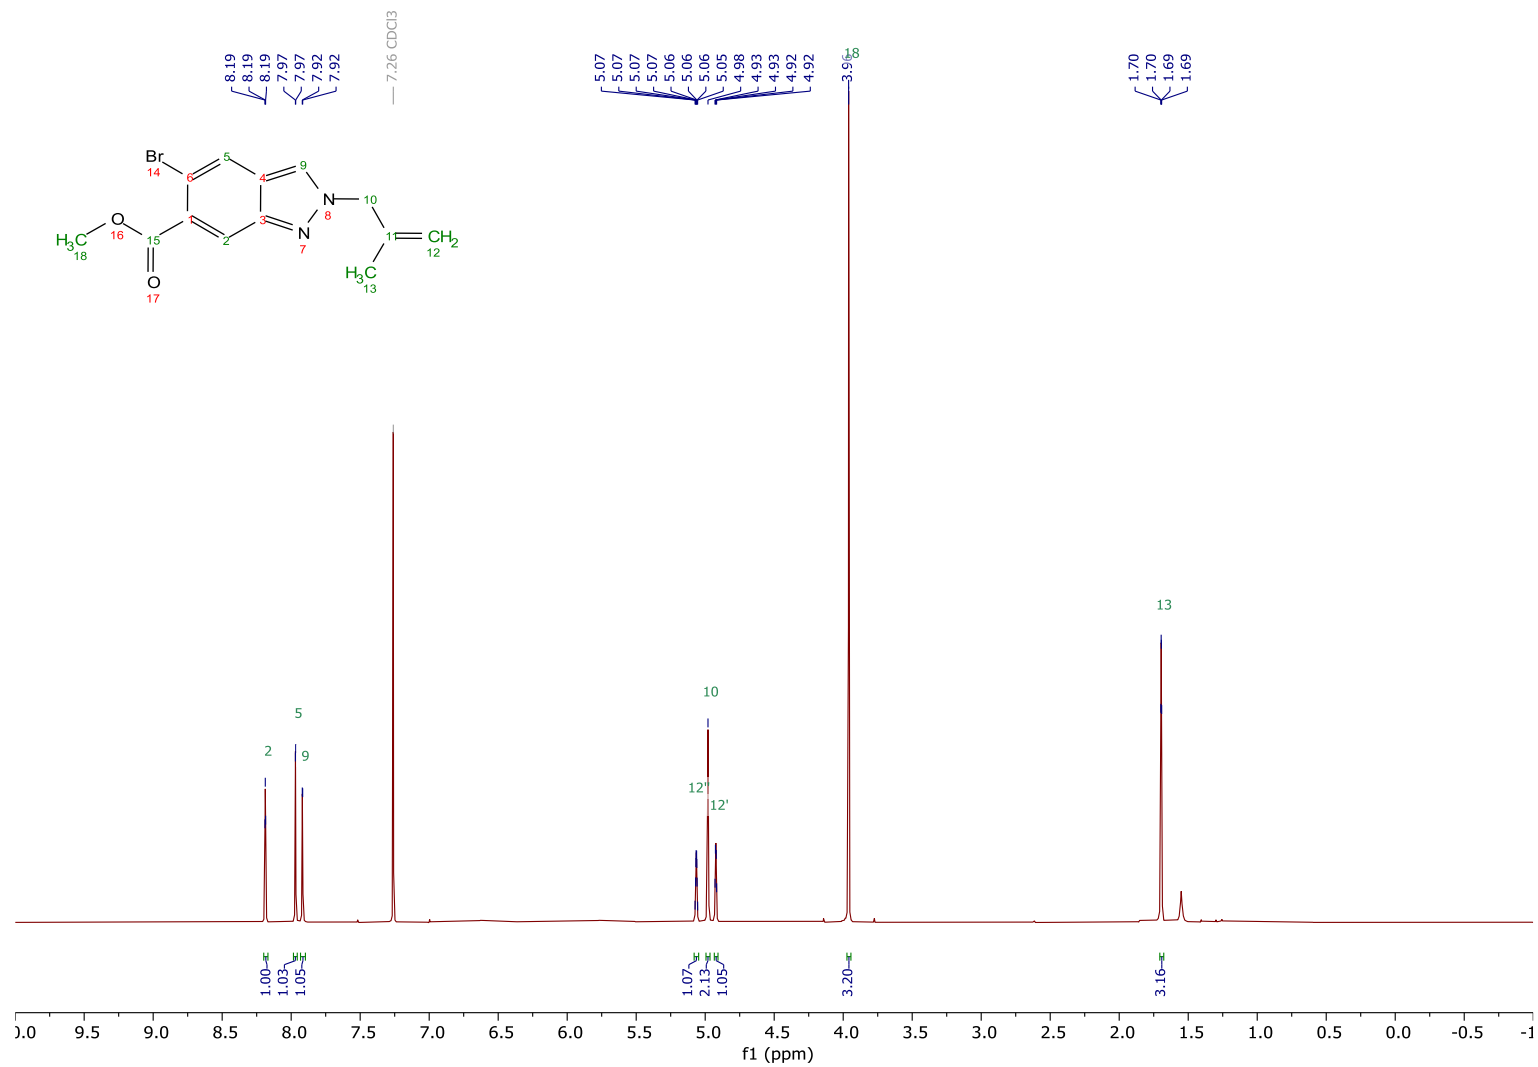

**$^{13}\text{C}$  NMR (101 MHz,  $\text{CDCl}_3$ )**

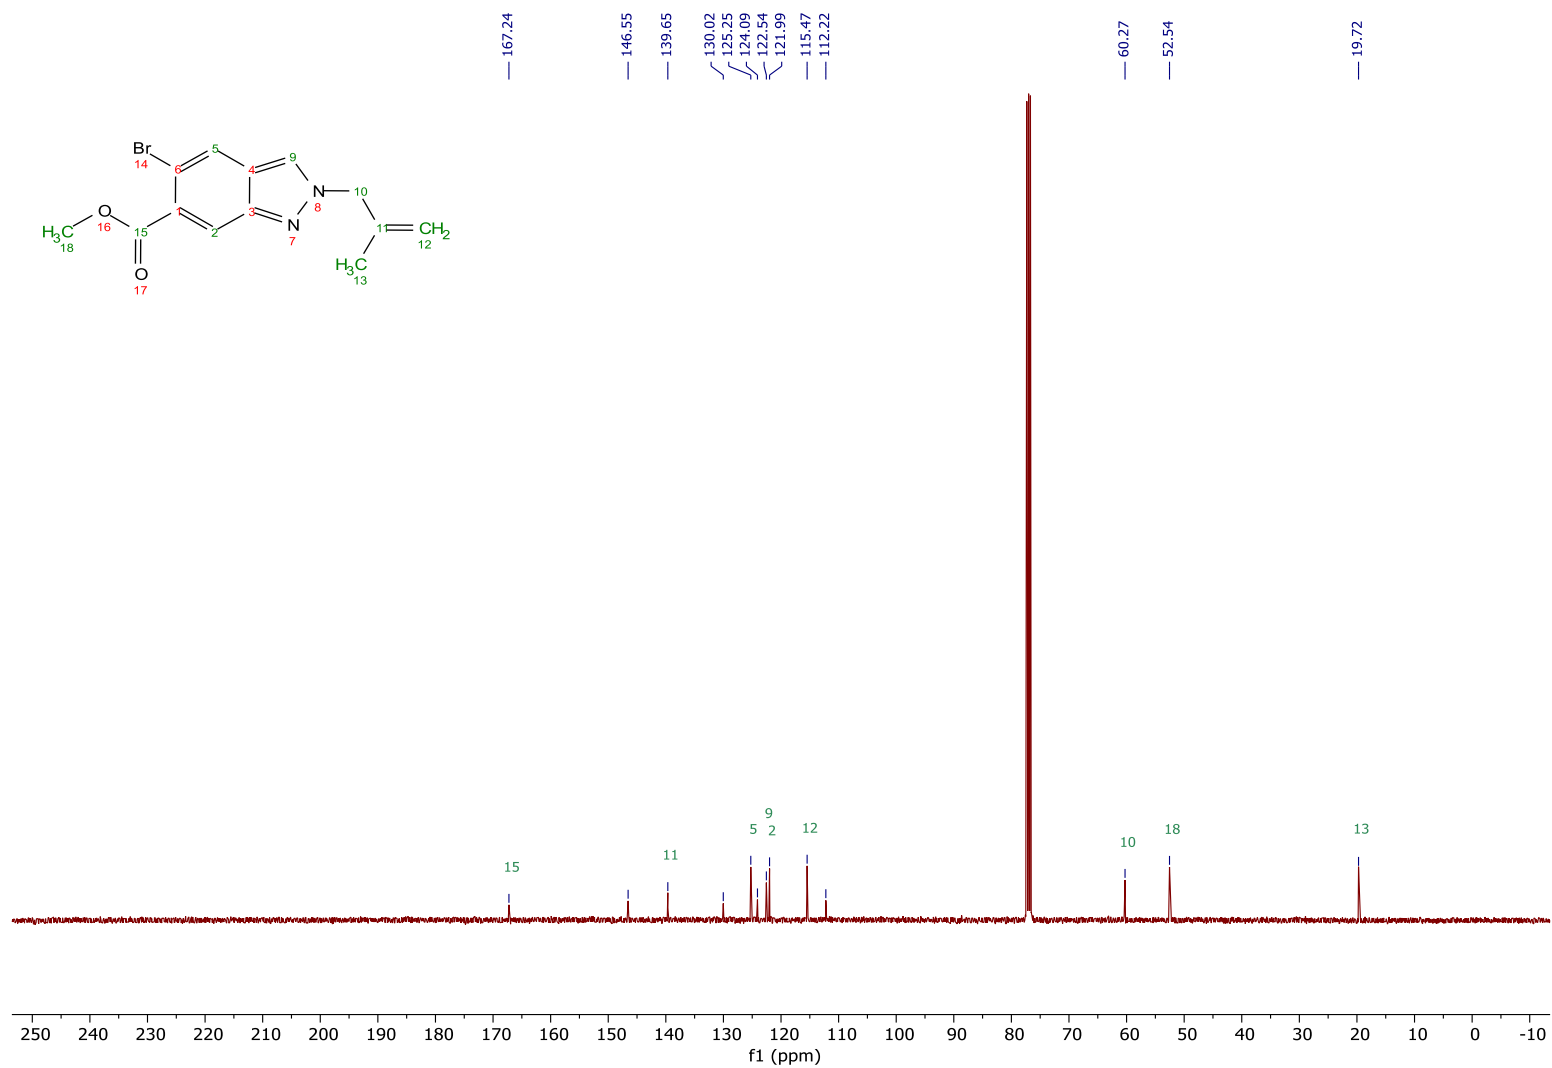

$^1\text{H}$ - $^{13}\text{C}$  HSQC ( $\text{CDCl}_3$ )

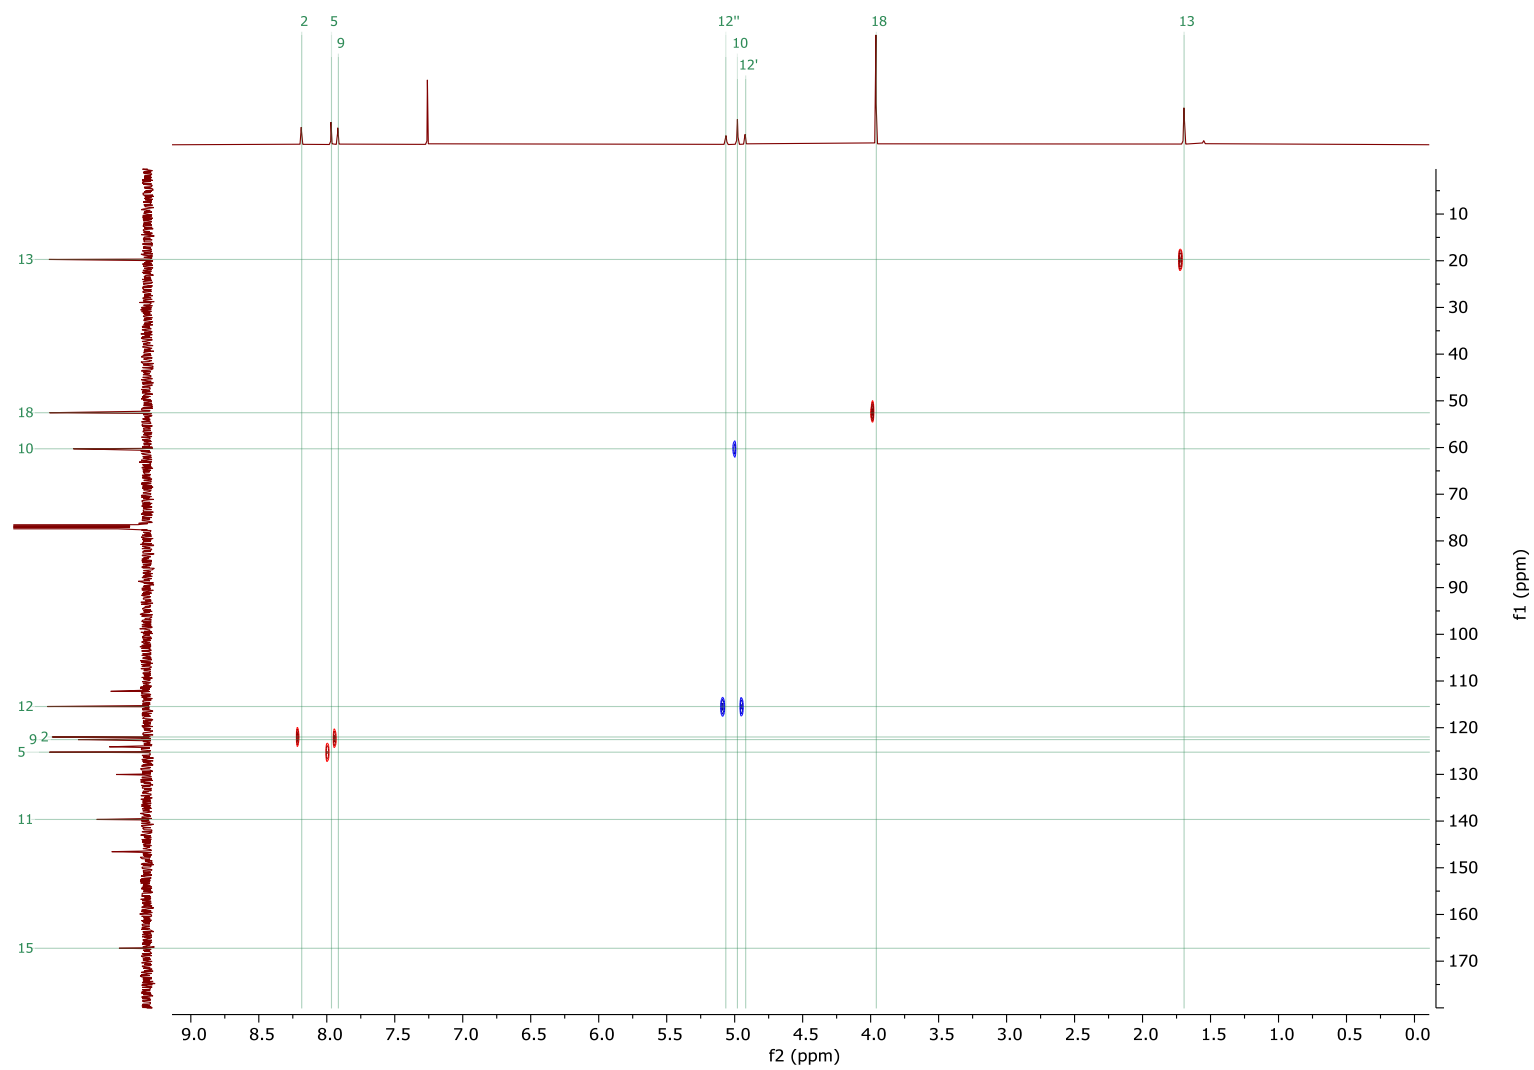

$^1\text{H}$ - $^{13}\text{C}$  HMBC ( $\text{CDCl}_3$ )

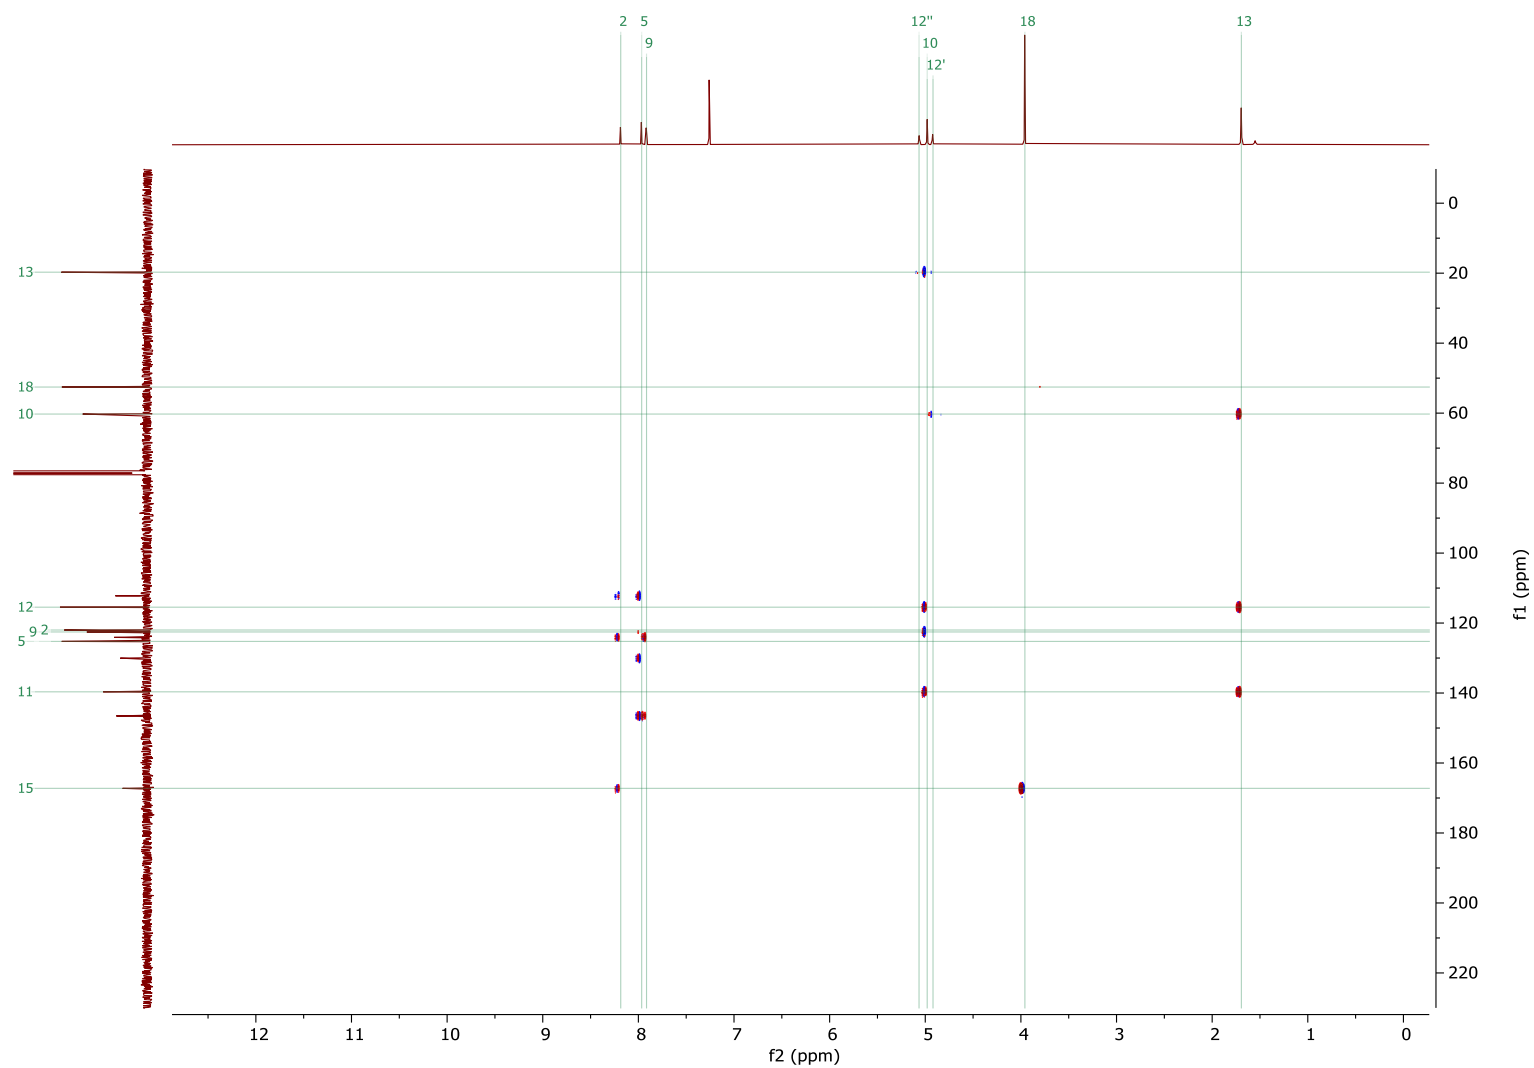

$^1\text{H}$ - $^1\text{H}$  NOESY (400 MHz,  $\text{CDCl}_3$ )

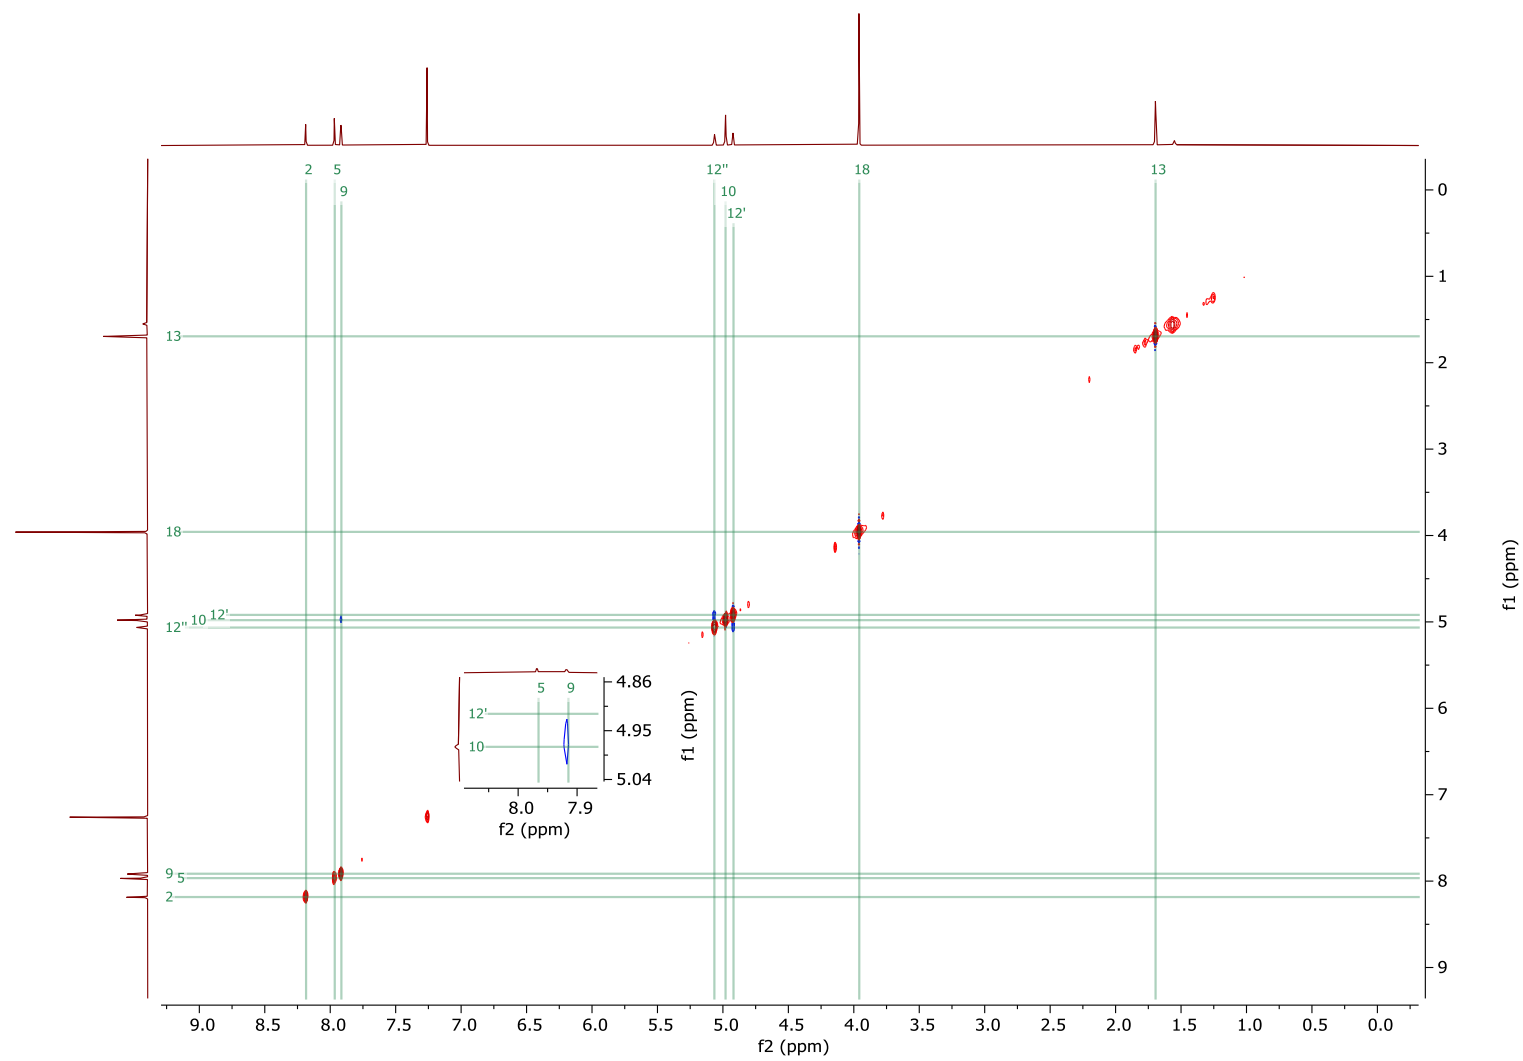

**Methyl 5-bromo-2-(1-(5-bromo-6-(methoxycarbonyl)-1*H*-indazol-1-yl)-2-methylpropyl)-2*H*-indazole-6-carboxylate**

**<sup>1</sup>H NMR (400 MHz, DMSO-*d*<sub>6</sub>)**

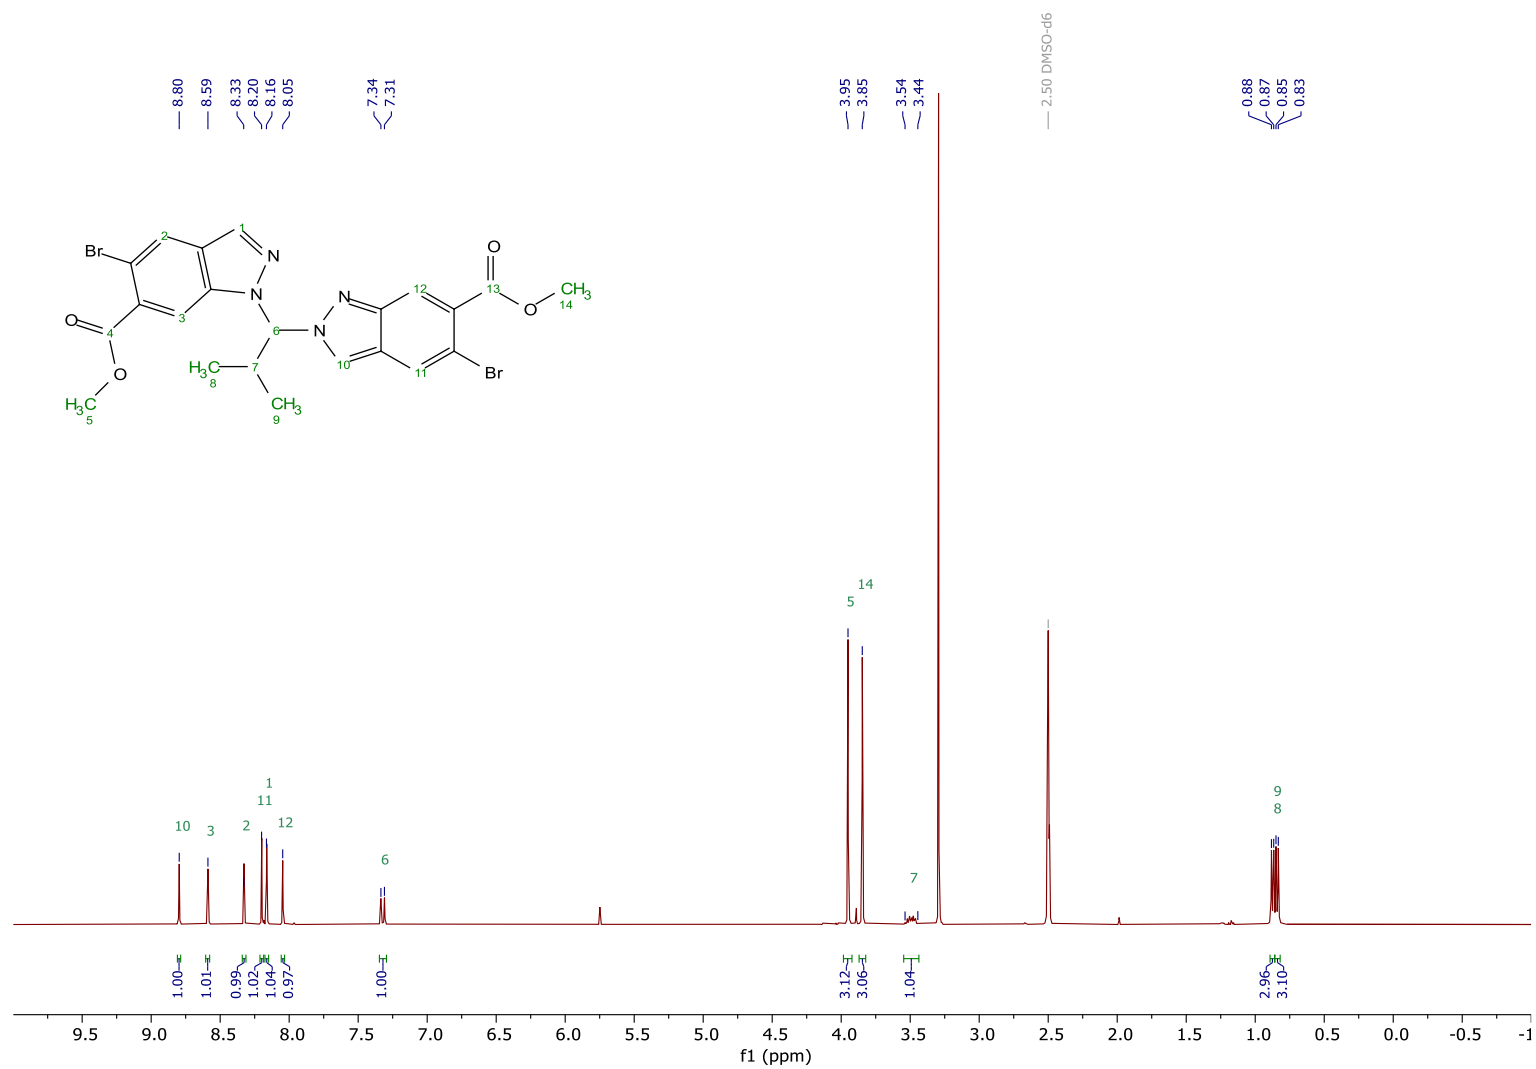

**$^{13}\text{C}$  NMR (101 MHz, DMSO- $d_6$ )**

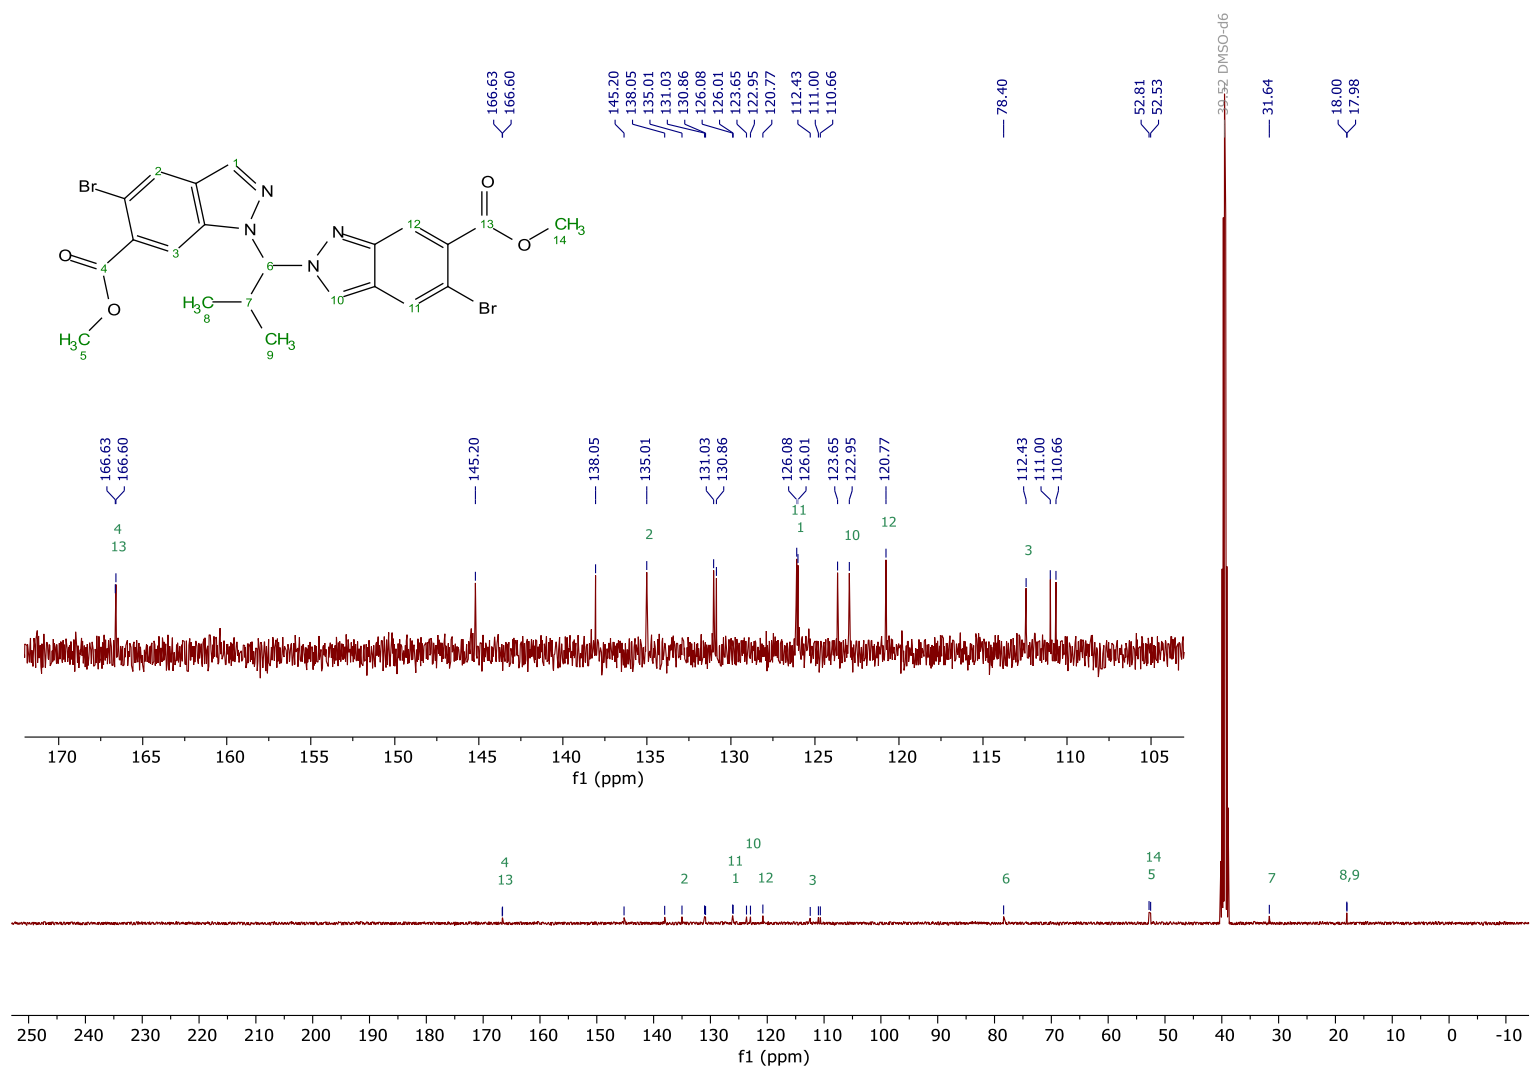

$^1\text{H}$ - $^{13}\text{C}$  HSQC (DMSO- $d_6$ )

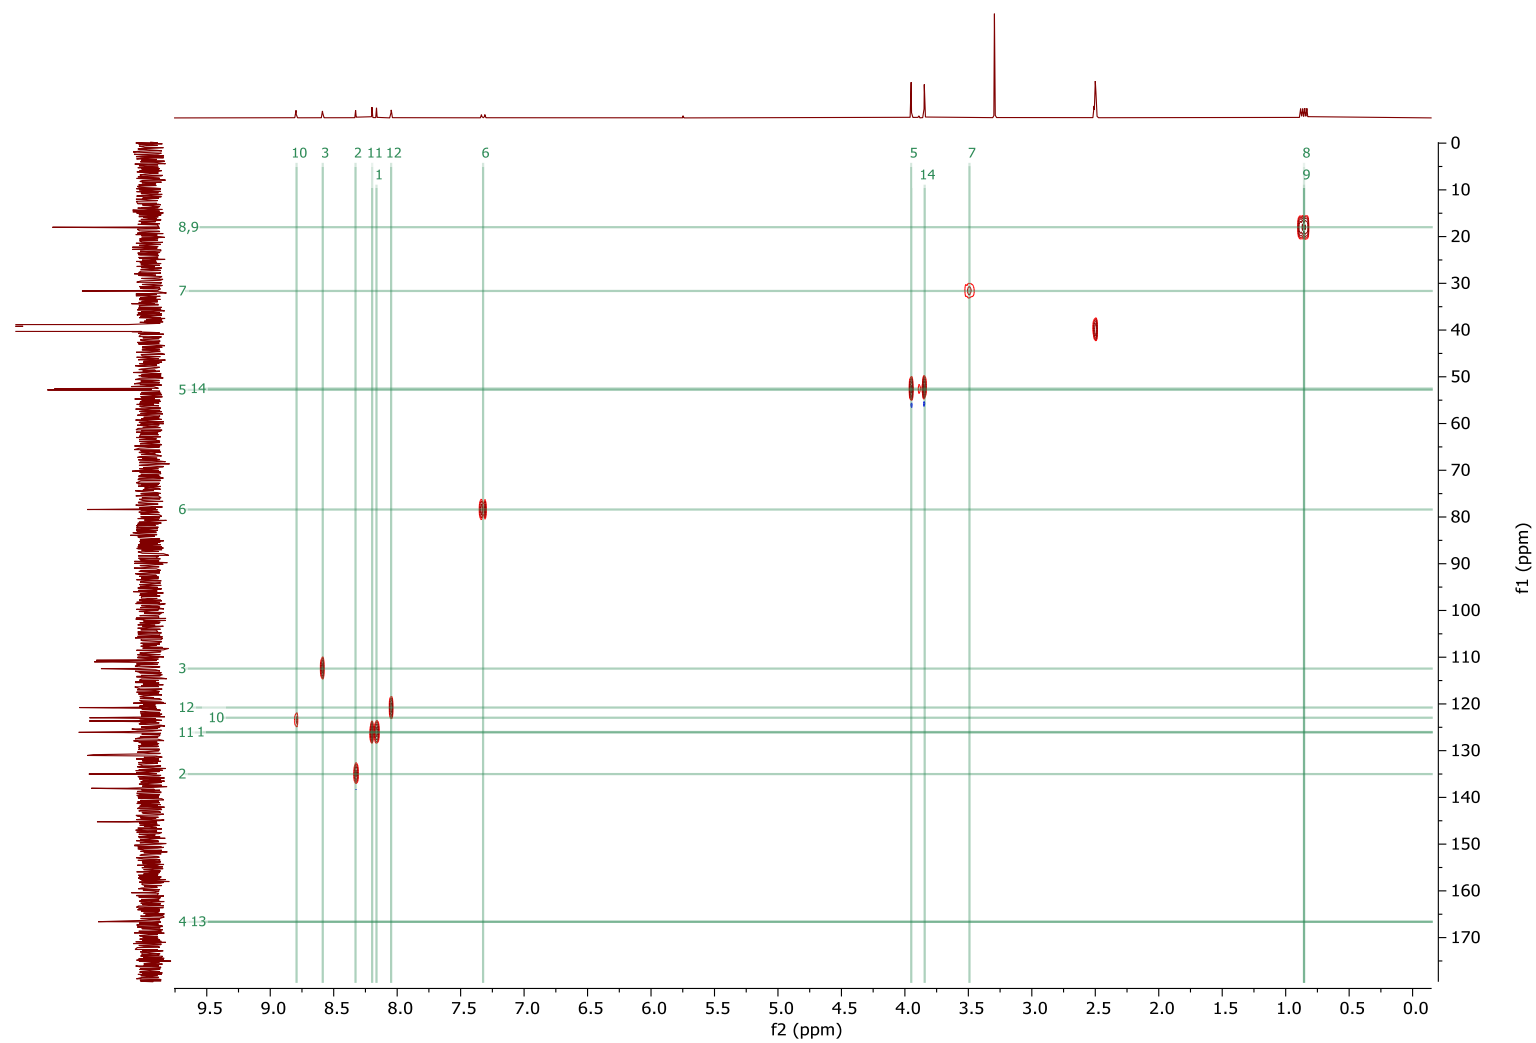

<sup>1</sup>H-<sup>13</sup>C HMBC (DMSO-*d*<sub>6</sub>)

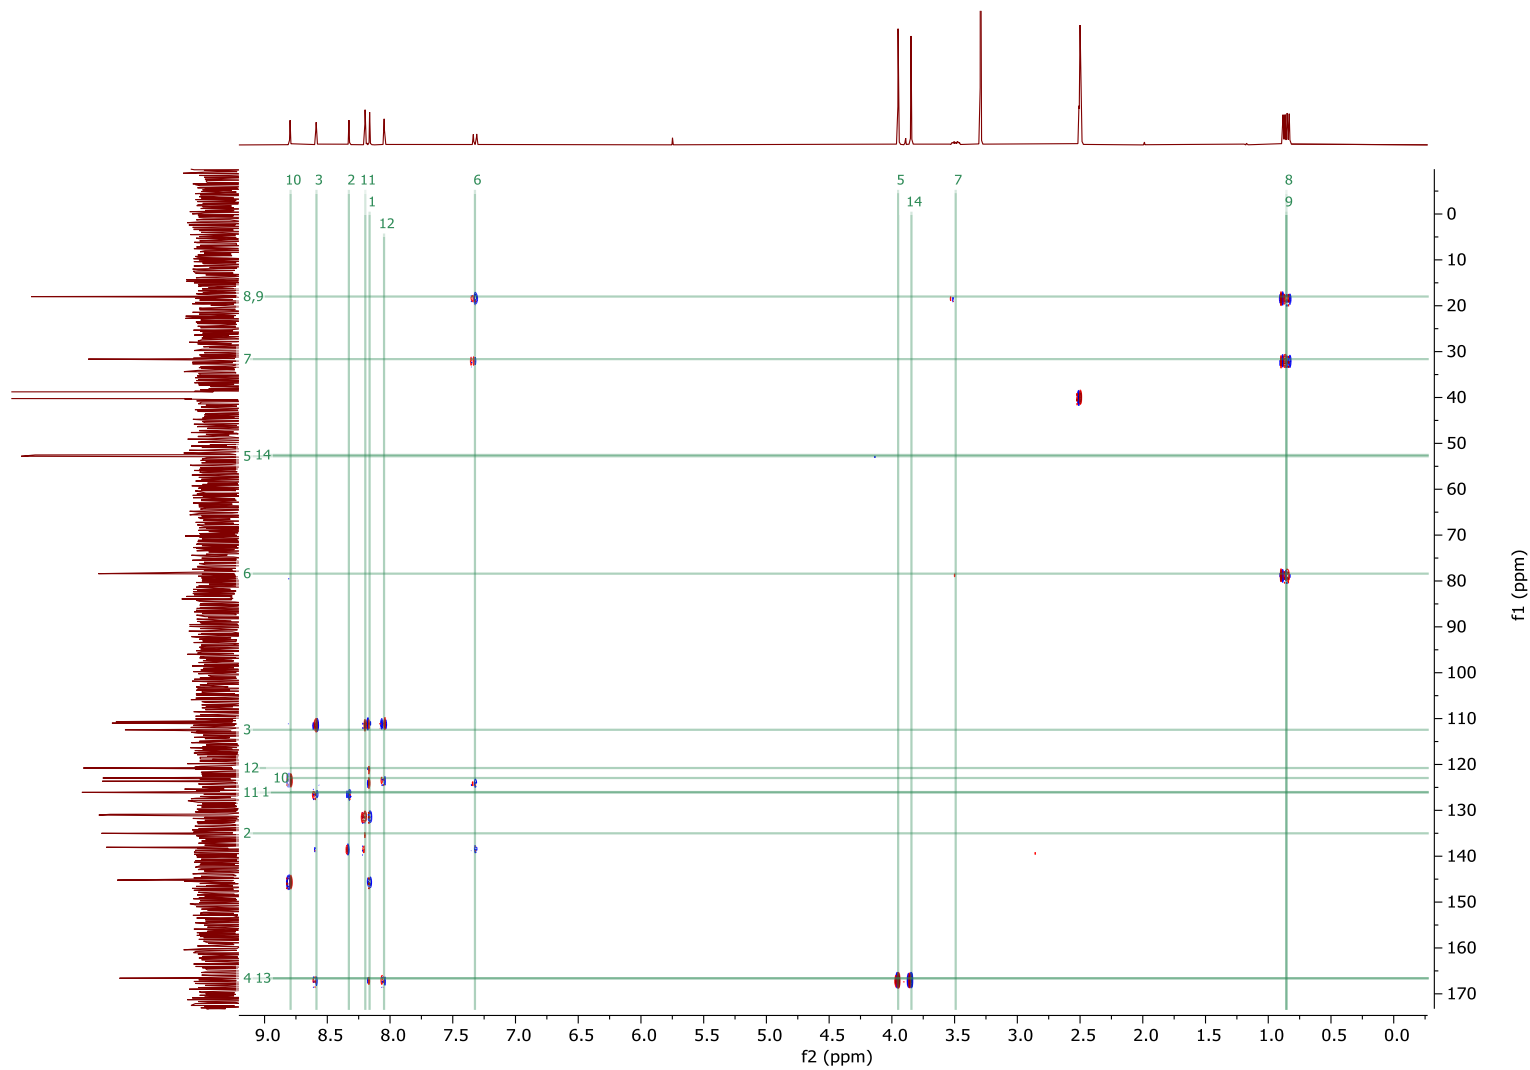

$^1\text{H}$ - $^1\text{H}$  NOESY (400 MHz, DMSO- $d_6$ )

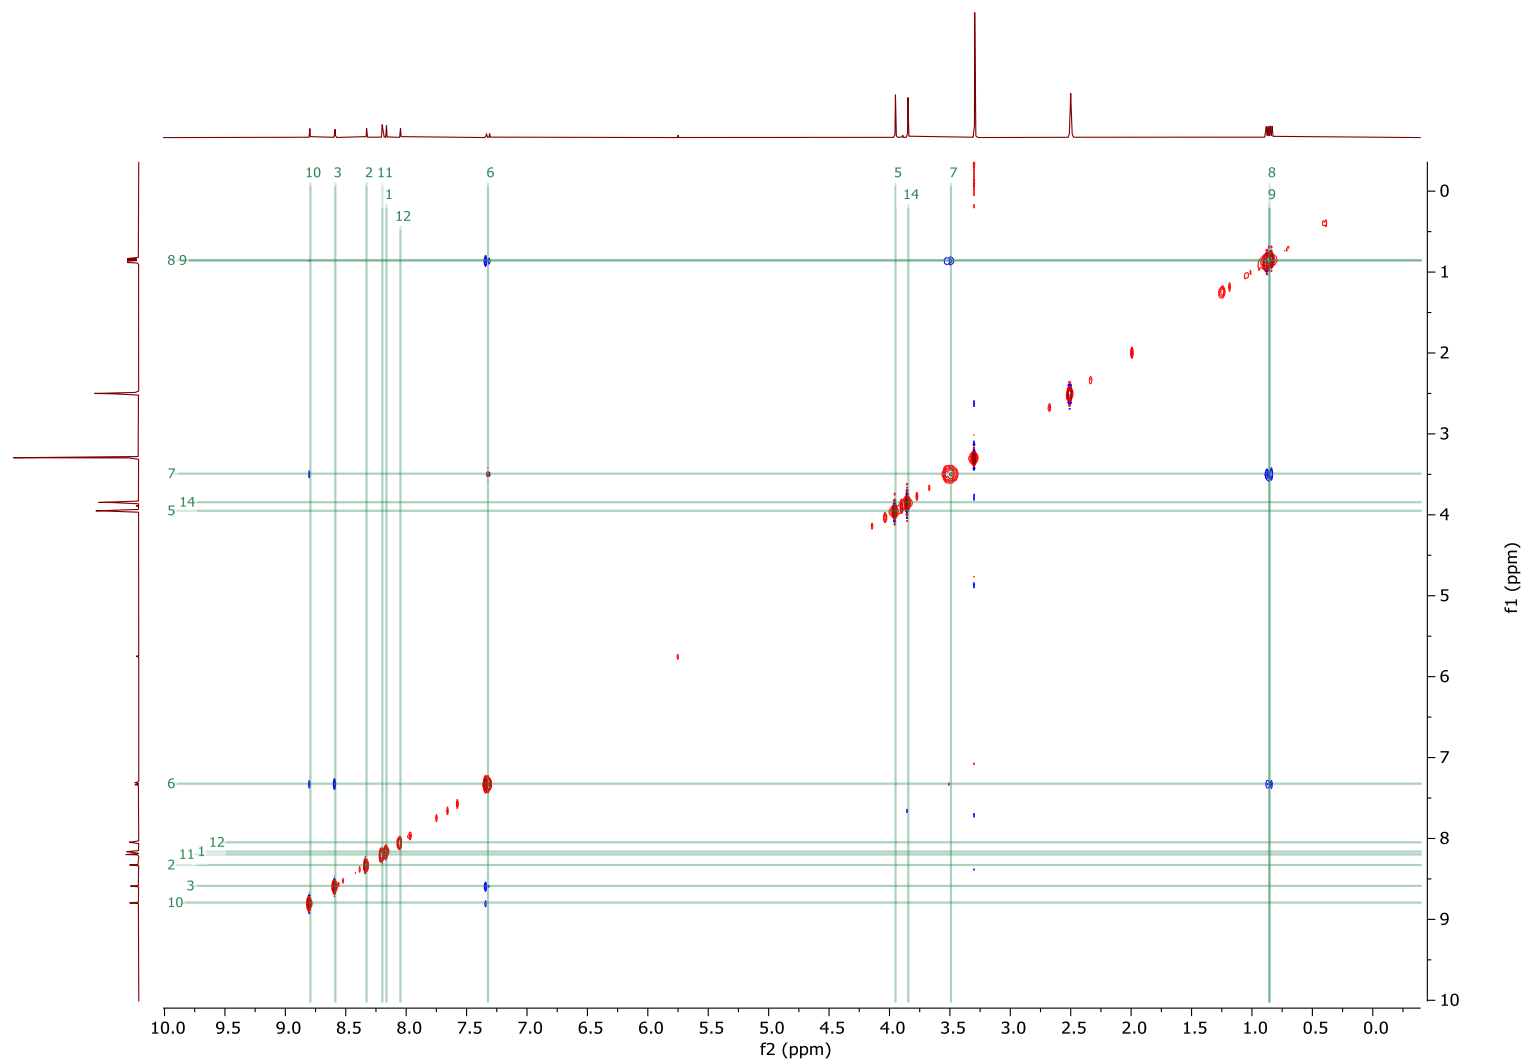

# Methyl 5-bromo-1-isobutyl-1*H*-indazole-6-carboxylate·*p*TSA

<sup>1</sup>H NMR (400 MHz, MeOD)

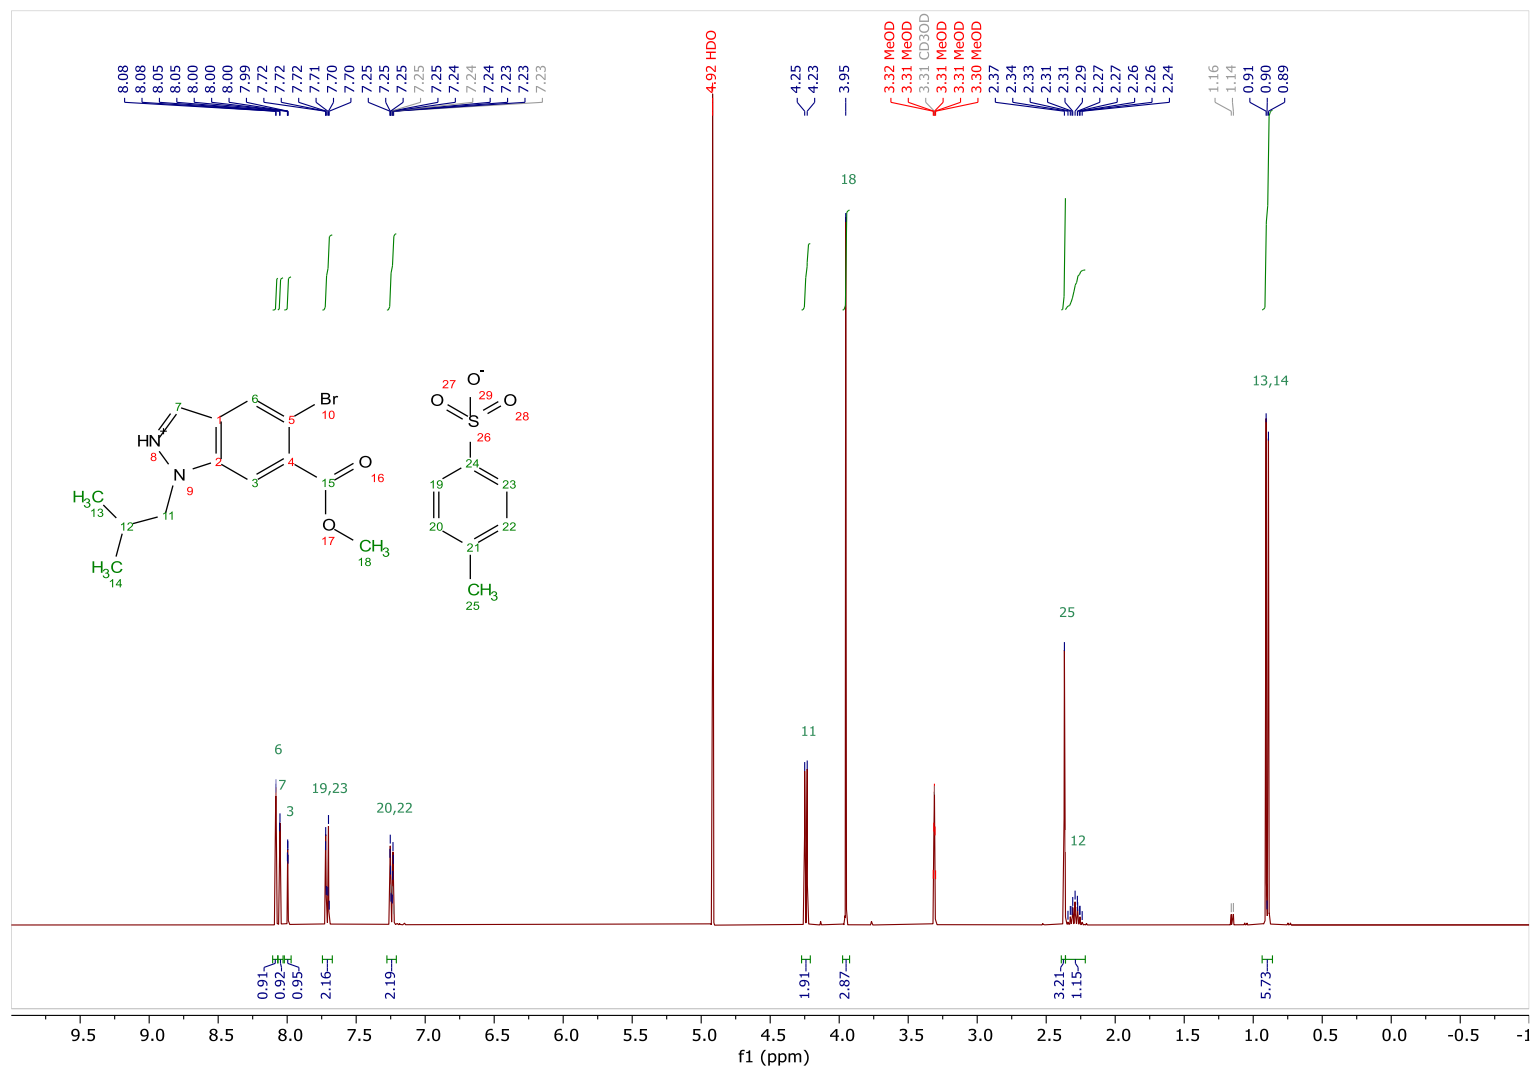

**$^{13}\text{C}$  NMR (101 MHz, MeOD)**

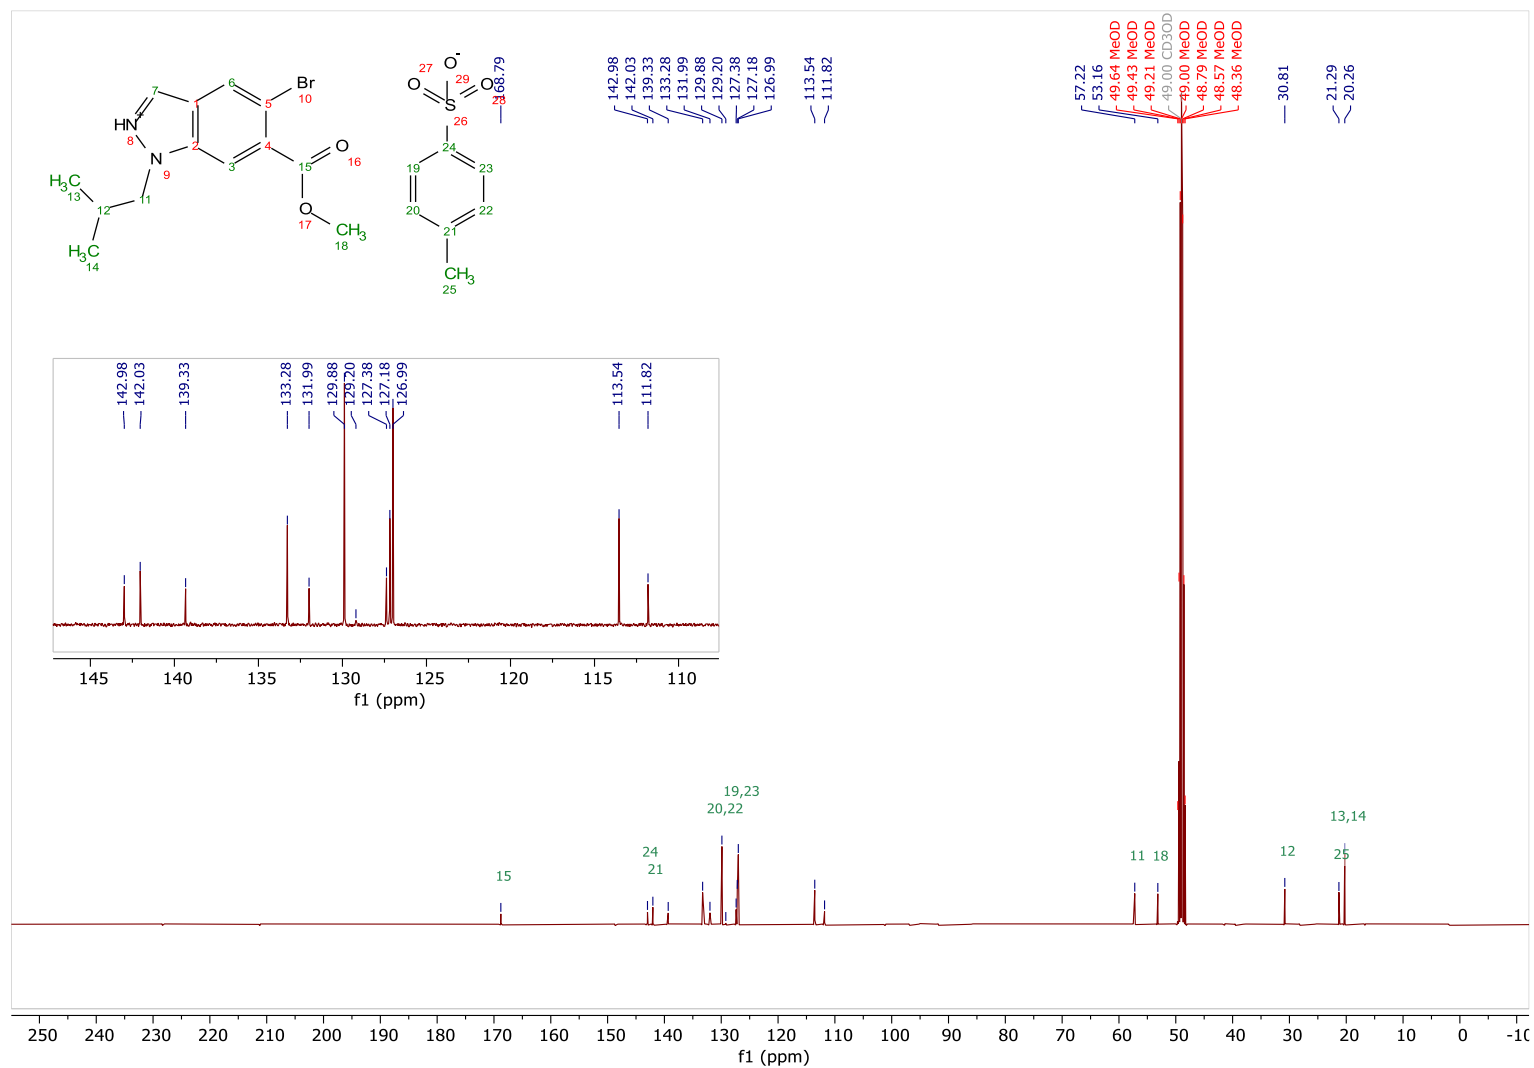

$^1\text{H}$ - $^{13}\text{C}$  HSQC (MeOD)

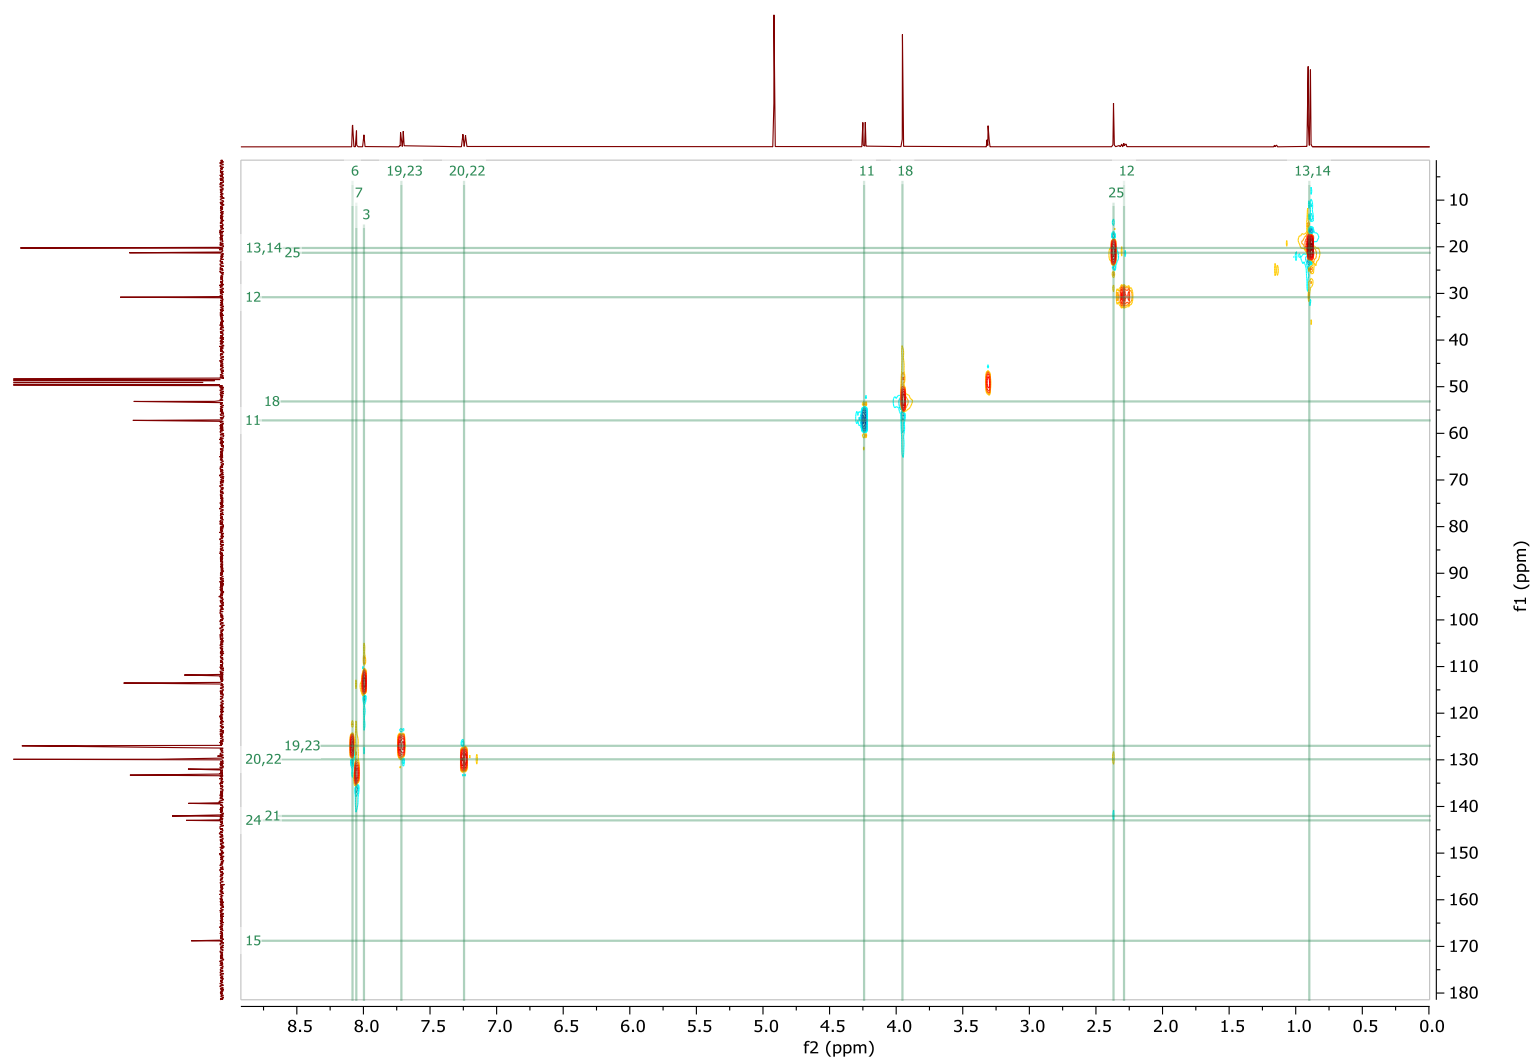

$^1\text{H}$ - $^{13}\text{C}$  HMBC (MeOD)

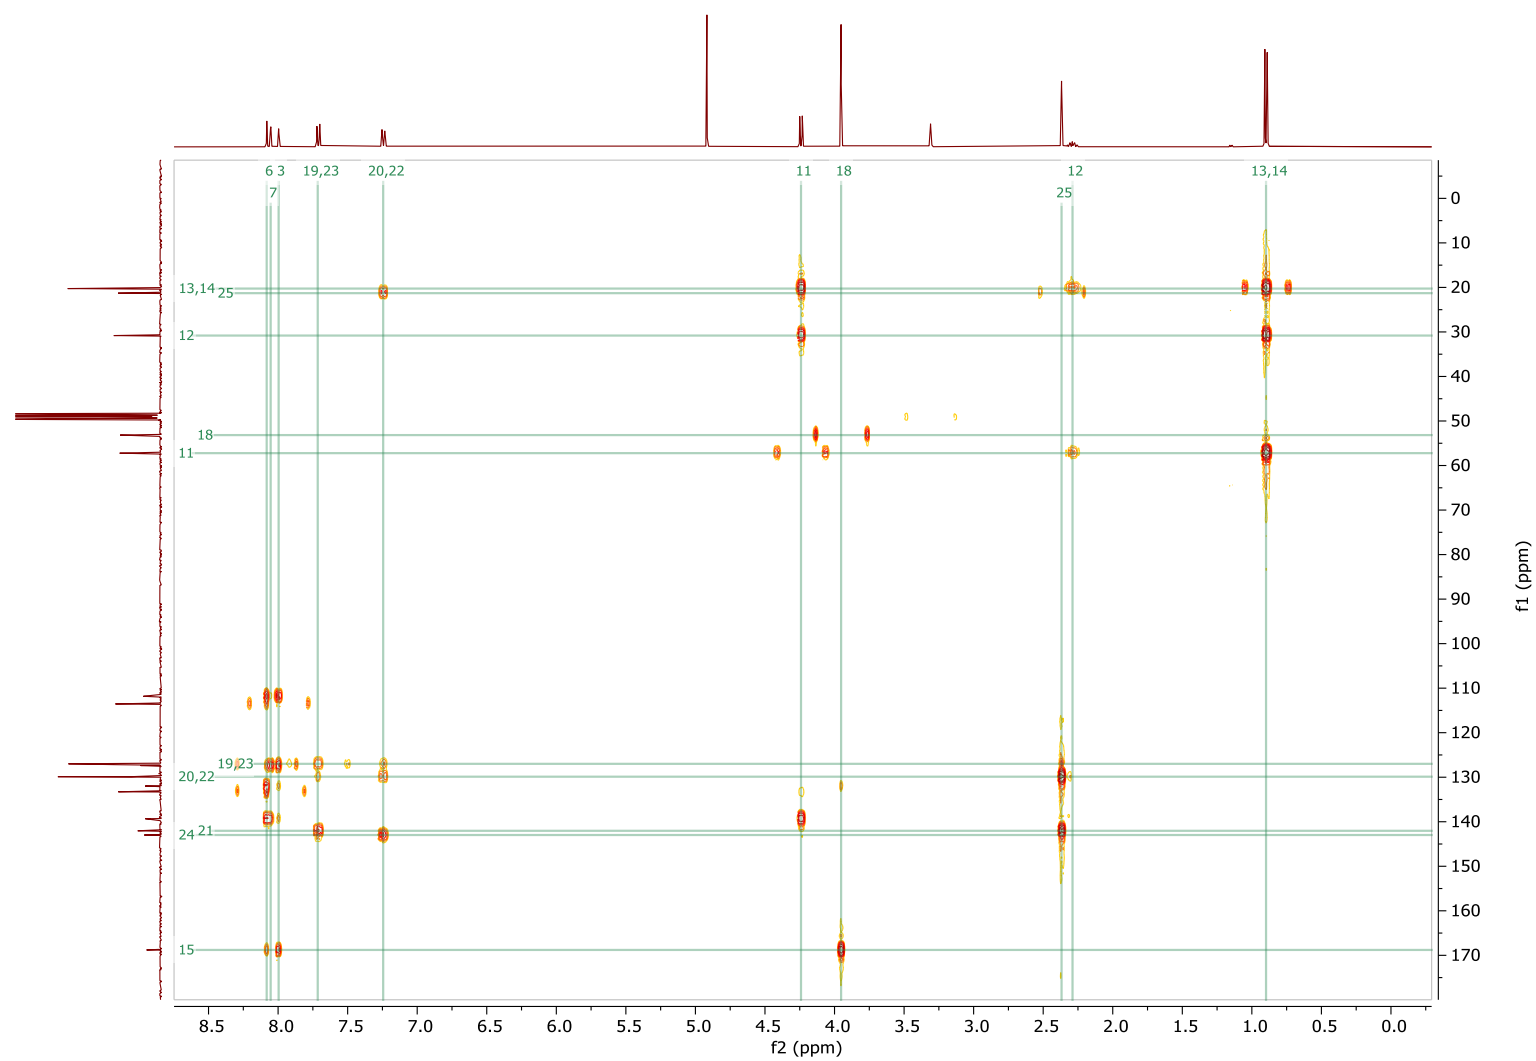

$^1\text{H}$ - $^1\text{H}$  NOESY (400 MHz, MeOD)

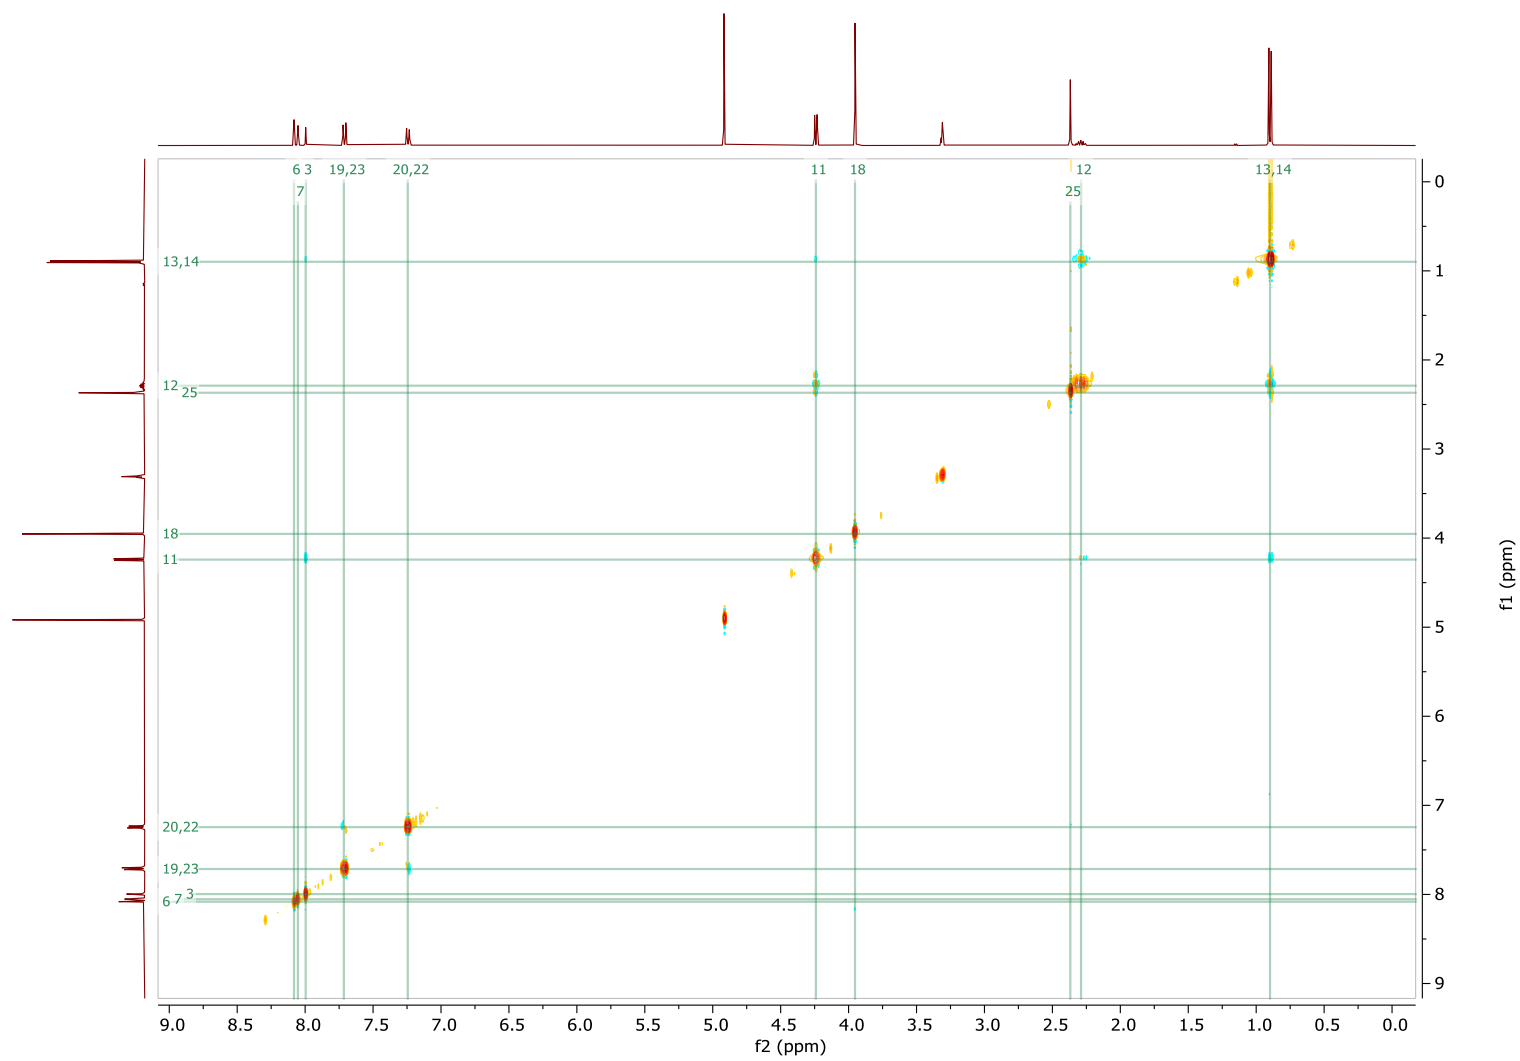

## References

1. H. E. Gottlieb, V. Kotlyar and A. Nudelman, *J Org Chem*, 1997, **62**, 7512-7515.
2. J. S. Derrick, M. Loipersberger, S. K. Nistanaki, A. V. Rothweiler, M. Head-Gordon, E. M. Nichols and C. J. Chang, *J Am Chem Soc*, 2022, **144**, 11656-11663.
3. *CRC Handbook of Chemistry and Physics*, CRC Press/Taylor and Francis Group, 87 edn., 2006.
4. W. Reeve, C. M. Erikson and P. F. Aluotto, *Canadian Journal of Chemistry*, 1979, **57**, 2747-2754.
5. T. Kagiya, Y. z. Sumida and T. Tachi, *Bulletin of the Chemical Society of Japan*, 1970, **43**, 3716-3722.
6. I. Kaljurand, A. Kutt, L. Soovali, T. Rodima, V. Maemets, I. Leito and I. A. Koppel, *J Org Chem*, 2005, **70**, 1019-1028.
7. H. C. Brown and B. Kanner, *Journal of the American Chemical Society*, 2002, **75**, 3865-3865.
8. E. Buncl and B. Menon, *Journal of the American Chemical Society*, 2002, **99**, 4457-4461.
9. H. Gilman and N. J. Beaber, *Journal of the American Chemical Society*, 2002, **47**, 518-525.
10. C. M. Hansen, *Hansen Solubility Parameters: A User's Handbook*, CRC Press, Inc., 1st ed. edn., 1999.
11. L. R. Snyder, *Journal of Chromatographic Science*, 1978, **16**, 223-234.
12. A. T. Londregan, J. Clemens and E. L. Bell, *Synthesis*, 2022, **54**, 3215-3226.
